# Supplementary material
Source: publisher figshare collection journal article supplement (https://diabetesjournals.figshare.com/articles/dataset/_/12170184)
Supplement: Supplementary file 1 [file 2]

## Sheet: RC-KO vs RC-WT
Upregulated								Downregulated
Category	GO	Description	LogP	Enrichment	Z-score	Log(q-value)		Category	GO	Description	LogP	Enrichment	Z-score	Log(q-value)
GO Biological Processes	GO:0006753	nucleoside phosphate metabolic process	-18	2.1	9.9	-14		GO Biological Processes	GO:0007017	microtubule-based process	-12	1.8	7.7	-7.7
GO Biological Processes	GO:0055086	nucleobase-containing small molecule metabolic process	-18	2	9.7	-14		GO Biological Processes	GO:0000226	microtubule cytoskeleton organization	-11	1.9	7.5	-7.2
GO Biological Processes	GO:0009117	nucleotide metabolic process	-18	2.1	9.8	-14		GO Biological Processes	GO:0032870	cellular response to hormone stimulus	-11	1.9	7.4	-7.2
GO Biological Processes	GO:0045333	cellular respiration	-17	3.1	10	-13		GO Biological Processes	GO:0030073	insulin secretion	-11	2.5	7.8	-7.2
KEGG Pathway	mmu00190	Oxidative phosphorylation	-17	3.3	10	-13		GO Biological Processes	GO:0031344	regulation of cell projection organization	-11	1.7	7.1	-6.9
GO Biological Processes	GO:0019693	ribose phosphate metabolic process	-16	2.1	9.3	-13		GO Biological Processes	GO:0030072	peptide hormone secretion	-10	2.3	7.4	-6.7
GO Biological Processes	GO:0007005	mitochondrion organization	-16	2.1	9.2	-12		GO Biological Processes	GO:0120035	regulation of plasma membrane bounded cell projection organization	-10	1.7	6.9	-6.6
GO Biological Processes	GO:0006091	generation of precursor metabolites and energy	-15	2.2	9.2	-12		GO Biological Processes	GO:0006325	chromatin organization	-9.5	1.7	6.7	-6.1
GO Biological Processes	GO:0009259	ribonucleotide metabolic process	-15	2.1	9	-12		GO Biological Processes	GO:0023061	signal release	-9.3	1.8	6.8	-6
GO Biological Processes	GO:0009150	purine ribonucleotide metabolic process	-15	2.1	9	-12		GO Biological Processes	GO:0060322	head development	-9.1	1.7	6.6	-5.8
GO Biological Processes	GO:0009167	purine ribonucleoside monophosphate metabolic process	-15	2.5	9.2	-12		GO Biological Processes	GO:0007420	brain development	-9	1.7	6.6	-5.8
GO Biological Processes	GO:0009123	nucleoside monophosphate metabolic process	-15	2.4	9.1	-12		GO Biological Processes	GO:0120039	plasma membrane bounded cell projection morphogenesis	-9	1.7	6.5	-5.8
GO Biological Processes	GO:0009126	purine nucleoside monophosphate metabolic process	-15	2.5	9.2	-12		GO Biological Processes	GO:0048812	neuron projection morphogenesis	-9	1.7	6.5	-5.8
GO Biological Processes	GO:0009161	ribonucleoside monophosphate metabolic process	-15	2.4	9	-12		GO Biological Processes	GO:0031329	regulation of cellular catabolic process	-8.8	1.7	6.5	-5.7
GO Biological Processes	GO:0006163	purine nucleotide metabolic process	-14	2	8.5	-11		GO Biological Processes	GO:0048858	cell projection morphogenesis	-8.8	1.7	6.4	-5.7
Reactome Gene Sets	R-MMU-1428517	The citric acid (TCA) cycle and respiratory electron transport	-14	3	9	-11		GO Biological Processes	GO:1990778	protein localization to cell periphery	-8.7	2	6.6	-5.7
GO Biological Processes	GO:0015980	energy derivation by oxidation of organic compounds	-13	2.4	8.6	-10		GO Biological Processes	GO:0010563	negative regulation of phosphorus metabolic process	-8.6	1.8	6.4	-5.6
KEGG Pathway	mmu05012	Parkinson's disease	-13	2.9	8.8	-10		GO Biological Processes	GO:0045936	negative regulation of phosphate metabolic process	-8.6	1.8	6.4	-5.6
GO Biological Processes	GO:0072521	purine-containing compound metabolic process	-13	2	8.1	-9.9		GO Biological Processes	GO:0032990	cell part morphogenesis	-8.5	1.7	6.3	-5.5
KEGG Pathway	mmu05016	Huntington's disease	-13	2.6	8.5	-9.9		GO Biological Processes	GO:0045664	regulation of neuron differentiation	-8.5	1.6	6.3	-5.5
GO Biological Processes	GO:0009141	nucleoside triphosphate metabolic process	-12	2.2	8.2	-9.5		Reactome Gene Sets	R-MMU-212436	Generic Transcription Pathway	-8	1.6	6.1	-5
GO Biological Processes	GO:0022904	respiratory electron transport chain	-12	3.6	8.8	-9.5		GO Biological Processes	GO:0046879	hormone secretion	-7.9	1.9	6.2	-5
GO Biological Processes	GO:0051186	cofactor metabolic process	-12	1.9	7.9	-9.5		GO Biological Processes	GO:0007346	regulation of mitotic cell cycle	-7.9	1.8	6.1	-5
GO Biological Processes	GO:0009199	ribonucleoside triphosphate metabolic process	-12	2.3	8.1	-9.3		GO Biological Processes	GO:0009895	negative regulation of catabolic process	-7.9	2	6.3	-5
GO Biological Processes	GO:0017144	drug metabolic process	-12	1.7	7.7	-9.3		GO Biological Processes	GO:0120031	plasma membrane bounded cell projection assembly	-7.8	1.8	6.1	-5
GO Biological Processes	GO:0009144	purine nucleoside triphosphate metabolic process	-12	2.3	8.1	-9.3		GO Biological Processes	GO:0031400	negative regulation of protein modification process	-7.8	1.7	6.1	-5
GO Biological Processes	GO:0046034	ATP metabolic process	-12	2.4	8.2	-9.3		GO Biological Processes	GO:0009914	hormone transport	-7.8	1.9	6.2	-5
GO Biological Processes	GO:0022900	electron transport chain	-12	3.4	8.7	-9.3		GO Biological Processes	GO:0045859	regulation of protein kinase activity	-7.8	1.7	6	-5
GO Biological Processes	GO:0009205	purine ribonucleoside triphosphate metabolic process	-12	2.3	8.1	-9.3		GO Biological Processes	GO:0060271	cilium assembly	-7.7	2	6.2	-4.9
KEGG Pathway	mmu05010	Alzheimer's disease	-12	2.6	8.2	-9.1		GO Biological Processes	GO:0072659	protein localization to plasma membrane	-7.6	2.1	6.2	-4.9
GO Biological Processes	GO:1901137	carbohydrate derivative biosynthetic process	-11	1.8	7.4	-8.3		GO Biological Processes	GO:0030031	cell projection assembly	-7.6	1.8	6	-4.8
GO Biological Processes	GO:0044283	small molecule biosynthetic process	-11	1.7	7.3	-8.1		GO Biological Processes	GO:0042326	negative regulation of phosphorylation	-7.6	1.8	6	-4.8
GO Biological Processes	GO:0006520	cellular amino acid metabolic process	-10	2.2	7.3	-7.5		GO Biological Processes	GO:0010564	regulation of cell cycle process	-7.5	1.7	5.9	-4.8
Reactome Gene Sets	R-MMU-72766	Translation	-10	2.5	7.5	-7.5		GO Biological Processes	GO:0016358	dendrite development	-7.5	2	6.1	-4.8
GO Biological Processes	GO:0042775	mitochondrial ATP synthesis coupled electron transport	-9.8	3.7	7.8	-7		GO Biological Processes	GO:0099173	postsynapse organization	-7.5	2.3	6.2	-4.8
GO Biological Processes	GO:0044282	small molecule catabolic process	-9.6	2	7	-6.9		GO Biological Processes	GO:0009725	response to hormone	-7.3	1.6	5.8	-4.6
GO Biological Processes	GO:0090407	organophosphate biosynthetic process	-9.6	1.8	6.8	-6.9		GO Biological Processes	GO:1902532	negative regulation of intracellular signal transduction	-7.3	1.7	5.8	-4.6
GO Biological Processes	GO:0009060	aerobic respiration	-9.5	3.3	7.6	-6.9		GO Biological Processes	GO:0048880	sensory system development	-7.3	1.8	5.9	-4.6
KEGG Pathway	mmu01200	Carbon metabolism	-9.5	2.7	7.3	-6.8		GO Biological Processes	GO:0033365	protein localization to organelle	-7.2	1.6	5.7	-4.6
GO Biological Processes	GO:0016054	organic acid catabolic process	-9.4	2.2	7	-6.8		GO Biological Processes	GO:0070201	regulation of establishment of protein localization	-7.2	1.6	5.7	-4.5
GO Biological Processes	GO:0046395	carboxylic acid catabolic process	-9.4	2.2	7	-6.8		GO Biological Processes	GO:0150063	visual system development	-7.1	1.8	5.8	-4.4
Reactome Gene Sets	R-MMU-71403	Citric acid cycle (TCA cycle)	-9.4	5.8	8.2	-6.8		GO Biological Processes	GO:0099175	regulation of postsynapse organization	-7	2.6	6.2	-4.4
GO Biological Processes	GO:0006839	mitochondrial transport	-9.4	2.4	7.1	-6.8		GO Biological Processes	GO:0007051	spindle organization	-7	2.3	6	-4.4
GO Biological Processes	GO:0043648	dicarboxylic acid metabolic process	-9.4	3	7.4	-6.8		KEGG Pathway	mmu04068	FoxO signaling pathway	-7	2.5	6.1	-4.4
GO Biological Processes	GO:0006732	coenzyme metabolic process	-9.1	2	6.7	-6.5		GO Biological Processes	GO:0016569	covalent chromatin modification	-7	1.8	5.7	-4.4
GO Biological Processes	GO:0032543	mitochondrial translation	-9	3.2	7.3	-6.4		GO Biological Processes	GO:0044782	cilium organization	-7	1.9	5.8	-4.4
Reactome Gene Sets	R-MMU-556833	Metabolism of lipids	-9	1.6	6.5	-6.4		GO Biological Processes	GO:0050796	regulation of insulin secretion	-6.9	2.3	6	-4.3
GO Biological Processes	GO:0042773	ATP synthesis coupled electron transport	-8.9	3.5	7.4	-6.3		GO Biological Processes	GO:0090276	regulation of peptide hormone secretion	-6.9	2.1	5.9	-4.3
GO Biological Processes	GO:0140053	mitochondrial gene expression	-8.8	2.8	7.1	-6.3		GO Biological Processes	GO:0051493	regulation of cytoskeleton organization	-6.8	1.7	5.6	-4.3
GO Biological Processes	GO:0006518	peptide metabolic process	-8.8	1.6	6.4	-6.2		GO Biological Processes	GO:0001933	negative regulation of protein phosphorylation	-6.8	1.8	5.6	-4.2
GO Biological Processes	GO:0046390	ribose phosphate biosynthetic process	-8.8	2.2	6.7	-6.2		GO Biological Processes	GO:0043549	regulation of kinase activity	-6.7	1.6	5.5	-4.2
GO Biological Processes	GO:0019318	hexose metabolic process	-8.7	2.2	6.7	-6.1		GO Biological Processes	GO:1901653	cellular response to peptide	-6.7	2	5.7	-4.2
GO Biological Processes	GO:1901605	alpha-amino acid metabolic process	-8.7	2.2	6.7	-6.1		GO Biological Processes	GO:0016482	cytosolic transport	-6.7	2.4	5.9	-4.1
GO Biological Processes	GO:0009260	ribonucleotide biosynthetic process	-8.5	2.1	6.6	-6		GO Biological Processes	GO:0031346	positive regulation of cell projection organization	-6.6	1.7	5.5	-4.1
Reactome Gene Sets	R-MMU-71406	Pyruvate metabolism and Citric Acid (TCA) cycle	-8.5	3.6	7.2	-6		GO Biological Processes	GO:0071375	cellular response to peptide hormone stimulus	-6.6	2	5.7	-4.1
GO Biological Processes	GO:0009152	purine ribonucleotide biosynthetic process	-8.4	2.2	6.6	-5.9		GO Biological Processes	GO:0070647	protein modification by small protein conjugation or removal	-6.6	1.6	5.4	-4.1
GO Biological Processes	GO:1990542	mitochondrial transmembrane transport	-8.3	3.1	7	-5.8		KEGG Pathway	mmu04010	MAPK signaling pathway	-6.6	2	5.7	-4.1
KEGG Pathway	mmu04932	Non-alcoholic fatty liver disease (NAFLD)	-8.3	2.4	6.6	-5.8		GO Biological Processes	GO:0009306	protein secretion	-6.5	1.6	5.4	-4
GO Biological Processes	GO:0006119	oxidative phosphorylation	-8.3	2.8	6.8	-5.8		GO Biological Processes	GO:0050769	positive regulation of neurogenesis	-6.4	1.6	5.3	-3.9
GO Biological Processes	GO:0007006	mitochondrial membrane organization	-8.2	2.8	6.8	-5.7		GO Biological Processes	GO:0070507	regulation of microtubule cytoskeleton organization	-6.4	2.1	5.6	-3.9
GO Biological Processes	GO:1901293	nucleoside phosphate biosynthetic process	-8.2	2	6.4	-5.7		GO Biological Processes	GO:0050808	synapse organization	-6.3	1.7	5.4	-3.8
Reactome Gene Sets	R-MMU-71291	Metabolism of amino acids and derivatives	-8.2	2.2	6.4	-5.7		GO Biological Processes	GO:0001654	eye development	-6.3	1.8	5.4	-3.8
GO Biological Processes	GO:0042254	ribosome biogenesis	-8.1	2	6.3	-5.6		KEGG Pathway	mmu04911	Insulin secretion	-6.3	2.8	5.9	-3.8
Reactome Gene Sets	R-MMU-5389840	Mitochondrial translation elongation	-8.1	2.9	6.8	-5.6		GO Biological Processes	GO:0035418	protein localization to synapse	-6.3	2.8	5.9	-3.8
GO Biological Processes	GO:0005975	carbohydrate metabolic process	-8	1.7	6.1	-5.6		GO Biological Processes	GO:0051223	regulation of protein transport	-6.3	1.6	5.2	-3.8
GO Biological Processes	GO:0005996	monosaccharide metabolic process	-8	2	6.3	-5.5		GO Biological Processes	GO:0016567	protein ubiquitination	-6.2	1.6	5.3	-3.8
GO Biological Processes	GO:0009165	nucleotide biosynthetic process	-7.9	2	6.2	-5.5		GO Biological Processes	GO:0071900	regulation of protein serine/threonine kinase activity	-6.2	1.7	5.3	-3.8
KEGG Pathway	mmu01230	Biosynthesis of amino acids	-7.9	3	6.7	-5.4		GO Biological Processes	GO:0051962	positive regulation of nervous system development	-6.2	1.6	5.2	-3.8
GO Biological Processes	GO:0006575	cellular modified amino acid metabolic process	-7.8	2.3	6.4	-5.4		GO Biological Processes	GO:0002790	peptide secretion	-6.2	1.6	5.2	-3.7
Reactome Gene Sets	R-MMU-428157	Sphingolipid metabolism	-7.8	2.8	6.6	-5.4		GO Biological Processes	GO:0050890	cognition	-6.1	1.8	5.4	-3.7
GO Biological Processes	GO:0044242	cellular lipid catabolic process	-7.7	2.1	6.2	-5.3		GO Biological Processes	GO:0090087	regulation of peptide transport	-6.1	1.5	5.2	-3.7
Reactome Gene Sets	R-MMU-5368287	Mitochondrial translation	-7.6	2.8	6.5	-5.2		GO Biological Processes	GO:0048813	dendrite morphogenesis	-6.1	2.2	5.5	-3.7
GO Biological Processes	GO:0009066	aspartate family amino acid metabolic process	-7.6	3.7	6.8	-5.2		GO Biological Processes	GO:0006281	DNA repair	-6.1	1.7	5.3	-3.7
GO Biological Processes	GO:0006790	sulfur compound metabolic process	-7.6	2	6.1	-5.2		GO Biological Processes	GO:0042593	glucose homeostasis	-6.1	1.9	5.4	-3.7
GO Biological Processes	GO:0072522	purine-containing compound biosynthetic process	-7.4	2	6	-5		GO Biological Processes	GO:0032886	regulation of microtubule-based process	-6.1	2	5.4	-3.7
GO Biological Processes	GO:0006164	purine nucleotide biosynthetic process	-7.4	2	6	-5		GO Biological Processes	GO:0010975	regulation of neuron projection development	-6.1	1.6	5.2	-3.7
Reactome Gene Sets	R-MMU-71387	Metabolism of carbohydrates	-7.4	2.1	6	-5		GO Biological Processes	GO:0033500	carbohydrate homeostasis	-6	1.9	5.4	-3.7
Reactome Gene Sets	R-MMU-5419276	Mitochondrial translation termination	-7.2	2.7	6.3	-4.8		GO Biological Processes	GO:0051347	positive regulation of transferase activity	-6	1.6	5.2	-3.7
KEGG Pathway	mmu00330	Arginine and proline metabolism	-7.2	3.4	6.5	-4.8		GO Biological Processes	GO:0032446	protein modification by small protein conjugation	-6	1.6	5.1	-3.6
GO Biological Processes	GO:0009127	purine nucleoside monophosphate biosynthetic process	-7.1	2.3	6	-4.7		GO Biological Processes	GO:0051640	organelle localization	-6	1.6	5.1	-3.6
GO Biological Processes	GO:0009168	purine ribonucleoside monophosphate biosynthetic process	-7.1	2.3	6	-4.7		GO Biological Processes	GO:0048667	cell morphogenesis involved in neuron differentiation	-6	1.6	5.1	-3.6
GO Biological Processes	GO:0009124	nucleoside monophosphate biosynthetic process	-7	2.2	5.9	-4.6		GO Biological Processes	GO:0006974	cellular response to DNA damage stimulus	-6	1.5	5.1	-3.6
GO Biological Processes	GO:0051188	cofactor biosynthetic process	-6.9	2	5.8	-4.6		GO Biological Processes	GO:0034330	cell junction organization	-5.9	1.9	5.3	-3.6
GO Biological Processes	GO:1901136	carbohydrate derivative catabolic process	-6.9	2.4	6	-4.5		GO Biological Processes	GO:1902115	regulation of organelle assembly	-5.9	2.1	5.4	-3.6
GO Biological Processes	GO:0009156	ribonucleoside monophosphate biosynthetic process	-6.7	2.2	5.8	-4.4		GO Biological Processes	GO:0016570	histone modification	-5.9	1.7	5.2	-3.6
KEGG Pathway	mmu04142	Lysosome	-6.7	2.4	5.8	-4.3		GO Biological Processes	GO:1903047	mitotic cell cycle process	-5.9	1.6	5.1	-3.6
GO Biological Processes	GO:0030258	lipid modification	-6.6	2	5.6	-4.2		GO Biological Processes	GO:1903827	regulation of cellular protein localization	-5.9	1.6	5.1	-3.6
GO Biological Processes	GO:1901607	alpha-amino acid biosynthetic process	-6.5	3	6	-4.2		GO Biological Processes	GO:0090307	mitotic spindle assembly	-5.9	3.2	5.8	-3.6
GO Biological Processes	GO:0006733	oxidoreduction coenzyme metabolic process	-6.5	2.1	5.6	-4.1		GO Biological Processes	GO:0010638	positive regulation of organelle organization	-5.8	1.6	5.1	-3.5
GO Biological Processes	GO:0043604	amide biosynthetic process	-6.4	1.5	5.3	-4.1		GO Biological Processes	GO:0072657	protein localization to membrane	-5.8	1.6	5.1	-3.5
GO Biological Processes	GO:0009108	coenzyme biosynthetic process	-6.3	2.1	5.6	-4		GO Biological Processes	GO:0007052	mitotic spindle organization	-5.8	2.5	5.5	-3.5
Reactome Gene Sets	R-MMU-163200	Respiratory electron transport, ATP synthesis by chemiosmotic coupling, and heat production by uncou	-6.3	2.6	5.8	-4		GO Biological Processes	GO:0042177	negative regulation of protein catabolic process	-5.8	2.4	5.4	-3.5
CORUM	CORUM:382	Respiratory chain complex I, mitochondrial	-6.1	3.5	6	-3.9		GO Biological Processes	GO:0007612	learning	-5.8	2.2	5.3	-3.5
Reactome Gene Sets	R-MMU-1660662	Glycosphingolipid metabolism	-6.1	3.5	6	-3.9		GO Biological Processes	GO:0043010	camera-type eye development	-5.7	1.8	5.1	-3.5
GO Biological Processes	GO:0006644	phospholipid metabolic process	-6.1	1.7	5.3	-3.8		GO Biological Processes	GO:0099072	regulation of postsynaptic membrane neurotransmitter receptor levels	-5.7	2.6	5.5	-3.4
GO Biological Processes	GO:1902532	negative regulation of intracellular signal transduction	-6	1.6	5.1	-3.8		GO Biological Processes	GO:0016197	endosomal transport	-5.6	2	5.2	-3.4
GO Biological Processes	GO:0008652	cellular amino acid biosynthetic process	-6	2.8	5.7	-3.8		GO Biological Processes	GO:1901652	response to peptide	-5.6	1.7	5	-3.4
CORUM	CORUM:381	Respiratory chain complex I, mitochondrial	-6	3.5	6	-3.7		GO Biological Processes	GO:0097435	supramolecular fiber organization	-5.6	1.5	4.9	-3.4
GO Biological Processes	GO:0072350	tricarboxylic acid metabolic process	-6	3.5	6	-3.7		GO Biological Processes	GO:0009743	response to carbohydrate	-5.6	2.1	5.2	-3.4
GO Biological Processes	GO:0098655	cation transmembrane transport	-6	1.5	5.1	-3.7		GO Biological Processes	GO:0007264	small GTPase mediated signal transduction	-5.6	1.6	5	-3.4
GO Biological Processes	GO:0033108	mitochondrial respiratory chain complex assembly	-5.9	2.7	5.6	-3.6		GO Biological Processes	GO:1902850	microtubule cytoskeleton organization involved in mitosis	-5.6	2.3	5.3	-3.3
GO Biological Processes	GO:0016042	lipid catabolic process	-5.8	1.8	5.1	-3.5		GO Biological Processes	GO:0030522	intracellular receptor signaling pathway	-5.6	2	5.2	-3.3
KEGG Pathway	M00009	Citrate cycle (TCA cycle, Krebs cycle)	-5.7	4.2	6	-3.5		GO Biological Processes	GO:0051225	spindle assembly	-5.5	2.5	5.4	-3.3
KEGG Pathway	mmu_M00009	Citrate cycle (TCA cycle, Krebs cycle)	-5.7	4.2	6	-3.5		GO Biological Processes	GO:1905475	regulation of protein localization to membrane	-5.5	2.1	5.2	-3.3
Reactome Gene Sets	R-MMU-8868773	rRNA processing in the nucleus and cytosol	-5.7	2.3	5.3	-3.5		Reactome Gene Sets	R-MMU-163685	Integration of energy metabolism	-5.5	2.8	5.5	-3.3
Reactome Gene Sets	R-MMU-72312	rRNA processing	-5.7	2.3	5.3	-3.5		GO Biological Processes	GO:0030029	actin filament-based process	-5.5	1.5	4.8	-3.3
Reactome Gene Sets	R-MMU-6791226	Major pathway of rRNA processing in the nucleolus and cytosol	-5.7	2.3	5.3	-3.5		GO Biological Processes	GO:0009749	response to glucose	-5.5	2.1	5.2	-3.3
GO Biological Processes	GO:0006099	tricarboxylic acid cycle	-5.7	3.7	5.9	-3.5		GO Biological Processes	GO:0006469	negative regulation of protein kinase activity	-5.5	2.1	5.1	-3.3
KEGG Pathway	mmu00511	Other glycan degradation	-5.6	4.7	6.1	-3.4		GO Biological Processes	GO:0010720	positive regulation of cell development	-5.4	1.5	4.8	-3.2
GO Biological Processes	GO:0010823	negative regulation of mitochondrion organization	-5.6	3	5.6	-3.4		GO Biological Processes	GO:0045666	positive regulation of neuron differentiation	-5.4	1.6	4.9	-3.2
GO Biological Processes	GO:0010257	NADH dehydrogenase complex assembly	-5.6	3.2	5.6	-3.4		GO Biological Processes	GO:0031330	negative regulation of cellular catabolic process	-5.4	1.9	5	-3.2
GO Biological Processes	GO:0032981	mitochondrial respiratory chain complex I assembly	-5.6	3.2	5.6	-3.4		GO Biological Processes	GO:0007610	behavior	-5.4	1.5	4.8	-3.2
GO Biological Processes	GO:0006820	anion transport	-5.6	1.5	4.9	-3.4		Reactome Gene Sets	R-MMU-422475	Axon guidance	-5.4	1.9	5	-3.2
GO Biological Processes	GO:0009201	ribonucleoside triphosphate biosynthetic process	-5.5	2.1	5.2	-3.3		KEGG Pathway	mmu04520	Adherens junction	-5.4	2.8	5.4	-3.2
CORUM	CORUM:495	Cytochrome bc1-complex, mitochondrial	-5.5	6.1	6.3	-3.3		GO Biological Processes	GO:1905515	non-motile cilium assembly	-5.4	2.9	5.4	-3.2
GO Biological Processes	GO:0006101	citrate metabolic process	-5.5	3.6	5.7	-3.3		GO Biological Processes	GO:0046883	regulation of hormone secretion	-5.3	1.8	4.9	-3.1
GO Biological Processes	GO:0009142	nucleoside triphosphate biosynthetic process	-5.5	2.1	5.1	-3.3		GO Biological Processes	GO:0080135	regulation of cellular response to stress	-5.3	1.5	4.8	-3.1
GO Biological Processes	GO:0006665	sphingolipid metabolic process	-5.4	2.2	5.2	-3.3		GO Biological Processes	GO:0009746	response to hexose	-5.3	2.1	5	-3.1
GO Biological Processes	GO:0015986	ATP synthesis coupled proton transport	-5.4	4.2	5.8	-3.2		Reactome Gene Sets	R-MMU-2470946	Cohesin Loading onto Chromatin	-5.3	7.2	6.5	-3.1
GO Biological Processes	GO:0015985	energy coupled proton transport, down electrochemical gradient	-5.4	4.2	5.8	-3.2		Reactome Gene Sets	R-MMU-5617833	Cilium Assembly	-5.3	2	5	-3.1
GO Biological Processes	GO:0009206	purine ribonucleoside triphosphate biosynthetic process	-5.4	2.1	5.1	-3.2		GO Biological Processes	GO:0009896	positive regulation of catabolic process	-5.3	1.7	4.8	-3.1
GO Biological Processes	GO:0006754	ATP biosynthetic process	-5.4	2.2	5.1	-3.2		GO Biological Processes	GO:0034762	regulation of transmembrane transport	-5.3	1.6	4.8	-3.1
GO Biological Processes	GO:0030149	sphingolipid catabolic process	-5.4	3.7	5.6	-3.2		GO Biological Processes	GO:0016311	dephosphorylation	-5.3	1.7	4.8	-3.1
GO Biological Processes	GO:0009064	glutamine family amino acid metabolic process	-5.3	2.7	5.3	-3.1		GO Biological Processes	GO:0034284	response to monosaccharide	-5.3	2.1	5	-3.1
GO Biological Processes	GO:0009145	purine nucleoside triphosphate biosynthetic process	-5.3	2.1	5	-3.1		GO Biological Processes	GO:0048589	developmental growth	-5.2	1.5	4.7	-3.1
GO Biological Processes	GO:0046394	carboxylic acid biosynthetic process	-5.3	1.7	4.8	-3.1		Reactome Gene Sets	R-MMU-2990846	SUMOylation	-5.2	2.1	5	-3
GO Biological Processes	GO:0034404	nucleobase-containing small molecule biosynthetic process	-5.2	2	4.9	-3.1		GO Biological Processes	GO:0031023	microtubule organizing center organization	-5.2	2.3	5	-3
GO Biological Processes	GO:0016053	organic acid biosynthetic process	-5.2	1.6	4.8	-3.1		GO Biological Processes	GO:0051348	negative regulation of transferase activity	-5.1	1.9	4.8	-3
GO Biological Processes	GO:2001233	regulation of apoptotic signaling pathway	-5.2	1.6	4.7	-3.1		Reactome Gene Sets	R-MMU-3108232	SUMO E3 ligases SUMOylate target proteins	-5.1	2.1	5	-3
GO Biological Processes	GO:0043549	regulation of kinase activity	-5.2	1.4	4.6	-3		GO Biological Processes	GO:0045787	positive regulation of cell cycle	-5.1	1.7	4.8	-3
GO Biological Processes	GO:0097190	apoptotic signaling pathway	-5.2	1.5	4.6	-3		GO Biological Processes	GO:0050807	regulation of synapse organization	-5.1	1.8	4.8	-2.9
GO Biological Processes	GO:0006364	rRNA processing	-5.2	1.9	4.9	-3		GO Biological Processes	GO:0099003	vesicle-mediated transport in synapse	-5.1	1.9	4.8	-2.9
GO Biological Processes	GO:0019216	regulation of lipid metabolic process	-5.1	1.7	4.7	-3		GO Biological Processes	GO:0046777	protein autophosphorylation	-5	1.9	4.8	-2.9
GO Biological Processes	GO:0042255	ribosome assembly	-5.1	2.6	5.1	-3		GO Biological Processes	GO:0060627	regulation of vesicle-mediated transport	-5	1.5	4.6	-2.9
GO Biological Processes	GO:0006066	alcohol metabolic process	-5.1	1.7	4.7	-3		GO Biological Processes	GO:0008285	negative regulation of cell proliferation	-5	1.5	4.6	-2.9
GO Biological Processes	GO:0098660	inorganic ion transmembrane transport	-5.1	1.5	4.6	-3		GO Biological Processes	GO:0009755	hormone-mediated signaling pathway	-5	2.1	4.9	-2.8
GO Biological Processes	GO:0008610	lipid biosynthetic process	-5.1	1.5	4.6	-3		GO Biological Processes	GO:0051656	establishment of organelle localization	-5	1.6	4.6	-2.8
KEGG Pathway	mmu00480	Glutathione metabolism	-5.1	2.7	5.2	-2.9		GO Biological Processes	GO:0043409	negative regulation of MAPK cascade	-4.9	2.1	4.8	-2.8
GO Biological Processes	GO:0019915	lipid storage	-5.1	2.6	5.1	-2.9		GO Biological Processes	GO:0061572	actin filament bundle organization	-4.9	2.1	4.8	-2.8
GO Biological Processes	GO:1901292	nucleoside phosphate catabolic process	-5	2.1	4.9	-2.9		GO Biological Processes	GO:0045786	negative regulation of cell cycle	-4.9	1.6	4.6	-2.8
GO Biological Processes	GO:0046514	ceramide catabolic process	-5	4.2	5.6	-2.9		GO Biological Processes	GO:1904375	regulation of protein localization to cell periphery	-4.9	2.2	4.9	-2.8
GO Biological Processes	GO:0046496	nicotinamide nucleotide metabolic process	-5	2	4.8	-2.9		GO Biological Processes	GO:0050803	regulation of synapse structure or activity	-4.9	1.8	4.7	-2.8
GO Biological Processes	GO:0046479	glycosphingolipid catabolic process	-4.9	4.9	5.7	-2.8		GO Biological Processes	GO:0090278	negative regulation of peptide hormone secretion	-4.9	2.8	5.1	-2.8
GO Biological Processes	GO:0019395	fatty acid oxidation	-4.9	2.3	4.9	-2.8		GO Biological Processes	GO:0032922	circadian regulation of gene expression	-4.9	2.8	5.1	-2.8
GO Biological Processes	GO:0072524	pyridine-containing compound metabolic process	-4.9	2	4.7	-2.8		GO Biological Processes	GO:0051052	regulation of DNA metabolic process	-4.9	1.6	4.6	-2.8
GO Biological Processes	GO:0043043	peptide biosynthetic process	-4.9	1.5	4.5	-2.8		GO Biological Processes	GO:0007169	transmembrane receptor protein tyrosine kinase signaling pathway	-4.9	1.5	4.5	-2.8
GO Biological Processes	GO:0019362	pyridine nucleotide metabolic process	-4.9	2	4.7	-2.8		Reactome Gene Sets	R-MMU-9006934	Signaling by Receptor Tyrosine Kinases	-4.9	1.7	4.6	-2.8
GO Biological Processes	GO:0015672	monovalent inorganic cation transport	-4.8	1.5	4.5	-2.7		GO Biological Processes	GO:0071901	negative regulation of protein serine/threonine kinase activity	-4.9	2.3	4.9	-2.8
KEGG Pathway	mmu05014	Amyotrophic lateral sclerosis (ALS)	-4.8	2.8	5	-2.7		GO Biological Processes	GO:0007611	learning or memory	-4.9	1.8	4.6	-2.8
GO Biological Processes	GO:1901615	organic hydroxy compound metabolic process	-4.8	1.5	4.5	-2.7		GO Biological Processes	GO:0031331	positive regulation of cellular catabolic process	-4.9	1.7	4.6	-2.8
GO Biological Processes	GO:0007265	Ras protein signal transduction	-4.8	1.6	4.5	-2.7		GO Biological Processes	GO:0030036	actin cytoskeleton organization	-4.9	1.5	4.5	-2.8
GO Biological Processes	GO:0007264	small GTPase mediated signal transduction	-4.8	1.5	4.5	-2.7		GO Biological Processes	GO:0001678	cellular glucose homeostasis	-4.8	2.1	4.8	-2.8
GO Biological Processes	GO:0006672	ceramide metabolic process	-4.8	2.4	4.9	-2.7		GO Biological Processes	GO:0006470	protein dephosphorylation	-4.8	1.9	4.7	-2.8
GO Biological Processes	GO:0009166	nucleotide catabolic process	-4.8	2.1	4.7	-2.7		GO Biological Processes	GO:0097061	dendritic spine organization	-4.8	2.5	4.9	-2.8
GO Biological Processes	GO:0022613	ribonucleoprotein complex biogenesis	-4.8	1.6	4.5	-2.7		Reactome Gene Sets	R-MMU-2468052	Establishment of Sister Chromatid Cohesion	-4.8	6.5	6	-2.8
GO Biological Processes	GO:0006013	mannose metabolic process	-4.7	6	5.8	-2.7		GO Biological Processes	GO:0035264	multicellular organism growth	-4.8	1.9	4.7	-2.8
Reactome Gene Sets	R-MMU-8978868	Fatty acid metabolism	-4.7	1.8	4.6	-2.7		GO Biological Processes	GO:0051668	localization within membrane	-4.8	2	4.7	-2.8
GO Biological Processes	GO:0046466	membrane lipid catabolic process	-4.7	3.4	5.2	-2.7		GO Biological Processes	GO:0072358	cardiovascular system development	-4.8	1.5	4.4	-2.7
KEGG Pathway	mmu00020	Citrate cycle (TCA cycle)	-4.7	3.4	5.2	-2.7		GO Biological Processes	GO:0022604	regulation of cell morphogenesis	-4.8	1.6	4.5	-2.7
GO Biological Processes	GO:0098662	inorganic cation transmembrane transport	-4.7	1.4	4.4	-2.7		GO Biological Processes	GO:0035773	insulin secretion involved in cellular response to glucose stimulus	-4.8	2.5	4.9	-2.7
GO Biological Processes	GO:0034440	lipid oxidation	-4.7	2.2	4.8	-2.7		KEGG Pathway	mmu04015	Rap1 signaling pathway	-4.8	1.9	4.7	-2.7
GO Biological Processes	GO:0042273	ribosomal large subunit biogenesis	-4.7	2.4	4.8	-2.6		GO Biological Processes	GO:0071417	cellular response to organonitrogen compound	-4.8	1.5	4.5	-2.7
GO Biological Processes	GO:0032787	monocarboxylic acid metabolic process	-4.7	1.5	4.4	-2.6		GO Biological Processes	GO:0051017	actin filament bundle assembly	-4.7	2	4.7	-2.7
KEGG Pathway	mmu00071	Fatty acid degradation	-4.6	2.8	4.9	-2.6		GO Biological Processes	GO:0000165	MAPK cascade	-4.7	1.4	4.4	-2.7
GO Biological Processes	GO:0072329	monocarboxylic acid catabolic process	-4.6	2.1	4.7	-2.6		GO Biological Processes	GO:0007423	sensory organ development	-4.7	1.5	4.4	-2.7
GO Biological Processes	GO:0006635	fatty acid beta-oxidation	-4.6	2.5	4.8	-2.6		GO Biological Processes	GO:0033673	negative regulation of kinase activity	-4.7	1.9	4.6	-2.7
GO Biological Processes	GO:0006643	membrane lipid metabolic process	-4.6	1.9	4.6	-2.6		GO Biological Processes	GO:0032386	regulation of intracellular transport	-4.7	1.6	4.5	-2.7
GO Biological Processes	GO:0006006	glucose metabolic process	-4.6	1.8	4.5	-2.6		GO Biological Processes	GO:0071322	cellular response to carbohydrate stimulus	-4.7	2.1	4.7	-2.7
CORUM	CORUM:538	Cytochrome c oxidase, mitochondrial	-4.6	5.1	5.5	-2.6		Reactome Gene Sets	R-MMU-6794362	Protein-protein interactions at synapses	-4.7	2.7	5	-2.6
GO Biological Processes	GO:0019377	glycolipid catabolic process	-4.6	4.6	5.4	-2.6		Reactome Gene Sets	R-MMU-5620912	Anchoring of the basal body to the plasma membrane	-4.7	2.4	4.8	-2.6
GO Biological Processes	GO:0046434	organophosphate catabolic process	-4.6	1.8	4.5	-2.6		GO Biological Processes	GO:0007088	regulation of mitotic nuclear division	-4.7	2	4.7	-2.6
KEGG Pathway	mmu00410	beta-Alanine metabolism	-4.6	3.3	5	-2.5		GO Biological Processes	GO:0106027	neuron projection organization	-4.7	2.4	4.8	-2.6
GO Biological Processes	GO:0006412	translation	-4.6	1.4	4.3	-2.5		GO Biological Processes	GO:0010817	regulation of hormone levels	-4.6	1.5	4.4	-2.6
GO Biological Processes	GO:0000165	MAPK cascade	-4.5	1.4	4.2	-2.5		GO Biological Processes	GO:0043434	response to peptide hormone	-4.6	1.7	4.5	-2.6
GO Biological Processes	GO:0016049	cell growth	-4.5	1.5	4.3	-2.5		GO Biological Processes	GO:0097107	postsynaptic density assembly	-4.6	4.4	5.4	-2.6
Reactome Gene Sets	R-MMU-6799198	Complex I biogenesis	-4.5	2.6	4.8	-2.5		GO Biological Processes	GO:0051129	negative regulation of cellular component organization	-4.6	1.4	4.3	-2.6
GO Biological Processes	GO:0009067	aspartate family amino acid biosynthetic process	-4.5	3.8	5.2	-2.5		GO Biological Processes	GO:0035176	social behavior	-4.6	3	5	-2.6
GO Biological Processes	GO:0015711	organic anion transport	-4.5	1.5	4.3	-2.5		GO Biological Processes	GO:0051703	intraspecies interaction between organisms	-4.6	3	5	-2.6
GO Biological Processes	GO:0044272	sulfur compound biosynthetic process	-4.5	2.4	4.7	-2.5		KEGG Pathway	mmu04930	Type II diabetes mellitus	-4.6	3.1	5	-2.6
Reactome Gene Sets	R-MMU-611105	Respiratory electron transport	-4.5	2.5	4.7	-2.5		Reactome Gene Sets	R-MMU-1852241	Organelle biogenesis and maintenance	-4.6	1.9	4.5	-2.6
Reactome Gene Sets	R-MMU-15869	Metabolism of nucleotides	-4.5	2.2	4.6	-2.5		GO Biological Processes	GO:1903076	regulation of protein localization to plasma membrane	-4.6	2.3	4.7	-2.6
GO Biological Processes	GO:0009100	glycoprotein metabolic process	-4.5	1.6	4.3	-2.5		GO Biological Processes	GO:0051648	vesicle localization	-4.6	1.8	4.5	-2.6
GO Biological Processes	GO:0009062	fatty acid catabolic process	-4.5	2.2	4.6	-2.5		KEGG Pathway	mmu04919	Thyroid hormone signaling pathway	-4.6	2.3	4.7	-2.6
KEGG Pathway	mmu_M00079	Keratan sulfate degradation	-4.4	7.7	5.8	-2.4		GO Biological Processes	GO:0001944	vasculature development	-4.5	1.4	4.3	-2.5
KEGG Pathway	M00079	Keratan sulfate degradation	-4.4	7.7	5.8	-2.4		GO Biological Processes	GO:0051051	negative regulation of transport	-4.5	1.5	4.3	-2.5
KEGG Pathway	mmu01210	2-Oxocarboxylic acid metabolism	-4.4	4	5.1	-2.4		GO Biological Processes	GO:0061178	regulation of insulin secretion involved in cellular response to glucose stimulus	-4.5	2.5	4.8	-2.5
Reactome Gene Sets	R-MMU-196854	Metabolism of vitamins and cofactors	-4.4	1.8	4.4	-2.4		GO Biological Processes	GO:1903531	negative regulation of secretion by cell	-4.5	1.8	4.5	-2.5
GO Biological Processes	GO:0016072	rRNA metabolic process	-4.3	1.7	4.3	-2.3		GO Biological Processes	GO:1901699	cellular response to nitrogen compound	-4.5	1.5	4.3	-2.5
GO Biological Processes	GO:0006531	aspartate metabolic process	-4.3	5.4	5.4	-2.3		KEGG Pathway	mmu04510	Focal adhesion	-4.5	1.9	4.5	-2.5
GO Biological Processes	GO:0042181	ketone biosynthetic process	-4.3	2.9	4.7	-2.3		GO Biological Processes	GO:0007015	actin filament organization	-4.4	1.6	4.3	-2.4
KEGG Pathway	mmu01212	Fatty acid metabolism	-4.2	2.7	4.6	-2.3		GO Biological Processes	GO:0007098	centrosome cycle	-4.4	2.2	4.6	-2.4
GO Biological Processes	GO:0018126	protein hydroxylation	-4.2	3.4	4.9	-2.2		Reactome Gene Sets	R-MMU-2173795	Downregulation of SMAD2/3:SMAD4 transcriptional activity	-4.4	4.6	5.4	-2.4
GO Biological Processes	GO:0010876	lipid localization	-4.2	1.6	4.2	-2.2		GO Biological Processes	GO:0046628	positive regulation of insulin receptor signaling pathway	-4.4	4.2	5.2	-2.4
Reactome Gene Sets	R-MMU-194840	Rho GTPase cycle	-4.2	1.9	4.3	-2.2		GO Biological Processes	GO:0046676	negative regulation of insulin secretion	-4.4	2.9	4.8	-2.4
KEGG Pathway	mmu00600	Sphingolipid metabolism	-4.2	2.7	4.6	-2.2		GO Biological Processes	GO:1903539	protein localization to postsynaptic membrane	-4.4	2.9	4.8	-2.4
KEGG Pathway	mmu00270	Cysteine and methionine metabolism	-4.2	2.7	4.6	-2.2		GO Biological Processes	GO:0031669	cellular response to nutrient levels	-4.4	1.9	4.4	-2.4
GO Biological Processes	GO:0016051	carbohydrate biosynthetic process	-4.2	1.8	4.3	-2.2		KEGG Pathway	mmu04110	Cell cycle	-4.4	2.2	4.5	-2.4
GO Biological Processes	GO:0098656	anion transmembrane transport	-4.1	1.8	4.2	-2.2		KEGG Pathway	mmu04933	AGE-RAGE signaling pathway in diabetic complications	-4.3	2.3	4.6	-2.4
GO Biological Processes	GO:0006631	fatty acid metabolic process	-4.1	1.5	4.1	-2.2		GO Biological Processes	GO:1901987	regulation of cell cycle phase transition	-4.3	1.7	4.3	-2.4
GO Biological Processes	GO:0006120	mitochondrial electron transport, NADH to ubiquinone	-4.1	3.8	4.9	-2.2		GO Biological Processes	GO:0010976	positive regulation of neuron projection development	-4.3	1.6	4.3	-2.3
GO Biological Processes	GO:0006626	protein targeting to mitochondrion	-4.1	2.3	4.4	-2.1		GO Biological Processes	GO:0046888	negative regulation of hormone secretion	-4.3	2.3	4.6	-2.3
Reactome Gene Sets	R-MMU-5683057	MAPK family signaling cascades	-4.1	1.7	4.1	-2.1		GO Biological Processes	GO:0098693	regulation of synaptic vesicle cycle	-4.3	2.1	4.4	-2.3
GO Biological Processes	GO:0022604	regulation of cell morphogenesis	-4	1.4	4	-2.1		GO Biological Processes	GO:0007062	sister chromatid cohesion	-4.3	2.8	4.7	-2.3
GO Biological Processes	GO:0010942	positive regulation of cell death	-4	1.4	4	-2.1		GO Biological Processes	GO:0031668	cellular response to extracellular stimulus	-4.3	1.8	4.3	-2.3
Reactome Gene Sets	R-MMU-156590	Glutathione conjugation	-4	3.3	4.7	-2.1		GO Biological Processes	GO:0032101	regulation of response to external stimulus	-4.3	1.4	4.1	-2.3
GO Biological Processes	GO:0034470	ncRNA processing	-4	1.6	4	-2.1		GO Biological Processes	GO:0042176	regulation of protein catabolic process	-4.3	1.6	4.2	-2.3
GO Biological Processes	GO:0045859	regulation of protein kinase activity	-4	1.4	4	-2.1		GO Biological Processes	GO:0035641	locomotory exploration behavior	-4.2	4.9	5.3	-2.3
GO Biological Processes	GO:0006605	protein targeting	-4	1.7	4.1	-2.1		GO Biological Processes	GO:0030811	regulation of nucleotide catabolic process	-4.2	3	4.8	-2.3
GO Biological Processes	GO:0045017	glycerolipid biosynthetic process	-4	1.9	4.2	-2		GO Biological Processes	GO:0006110	regulation of glycolytic process	-4.2	3	4.8	-2.3
GO Biological Processes	GO:0017185	peptidyl-lysine hydroxylation	-4	5.8	5.2	-2		GO Biological Processes	GO:0140014	mitotic nuclear division	-4.2	1.8	4.3	-2.3
GO Biological Processes	GO:0010975	regulation of neuron projection development	-3.9	1.4	3.9	-2		GO Biological Processes	GO:0045814	negative regulation of gene expression, epigenetic	-4.2	2.4	4.5	-2.3
GO Biological Processes	GO:0006979	response to oxidative stress	-3.9	1.5	4	-2		GO Biological Processes	GO:0050708	regulation of protein secretion	-4.2	1.5	4.1	-2.3
GO Biological Processes	GO:0034660	ncRNA metabolic process	-3.9	1.5	3.9	-2		GO Biological Processes	GO:0070848	response to growth factor	-4.2	1.5	4.1	-2.3
KEGG Pathway	M00011	Citrate cycle, second carbon oxidation, 2-oxoglutarate => oxaloacetate	-3.9	4.4	4.9	-2		GO Biological Processes	GO:0050678	regulation of epithelial cell proliferation	-4.2	1.6	4.2	-2.3
KEGG Pathway	mmu_M00011	Citrate cycle, second carbon oxidation, 2-oxoglutarate => oxaloacetate	-3.9	4.4	4.9	-2		GO Biological Processes	GO:1901990	regulation of mitotic cell cycle phase transition	-4.2	1.8	4.2	-2.3
GO Biological Processes	GO:1902600	proton transmembrane transport	-3.9	2.1	4.2	-2		GO Biological Processes	GO:0002791	regulation of peptide secretion	-4.2	1.5	4.1	-2.2
GO Biological Processes	GO:0072655	establishment of protein localization to mitochondrion	-3.9	2.2	4.2	-2		GO Biological Processes	GO:0043086	negative regulation of catalytic activity	-4.2	1.4	4.1	-2.2
Reactome Gene Sets	R-MMU-5658442	Regulation of RAS by GAPs	-3.9	3.7	4.7	-2		GO Biological Processes	GO:0051298	centrosome duplication	-4.1	2.6	4.6	-2.2
GO Biological Processes	GO:1902229	regulation of intrinsic apoptotic signaling pathway in response to DNA damage	-3.9	2.9	4.5	-2		GO Biological Processes	GO:0061564	axon development	-4.1	1.5	4.1	-2.2
GO Biological Processes	GO:0018198	peptidyl-cysteine modification	-3.9	2.7	4.4	-2		GO Biological Processes	GO:0071333	cellular response to glucose stimulus	-4.1	2.1	4.3	-2.2
GO Biological Processes	GO:0007007	inner mitochondrial membrane organization	-3.9	3.2	4.5	-1.9		GO Biological Processes	GO:0072698	protein localization to microtubule cytoskeleton	-4.1	2.9	4.6	-2.2
Reactome Gene Sets	R-MMU-1483206	Glycerophospholipid biosynthesis	-3.8	2	4.1	-1.9		GO Biological Processes	GO:0045931	positive regulation of mitotic cell cycle	-4.1	2	4.3	-2.2
GO Biological Processes	GO:0009063	cellular amino acid catabolic process	-3.8	2.1	4.2	-1.9		GO Biological Processes	GO:0030866	cortical actin cytoskeleton organization	-4.1	3.1	4.7	-2.2
GO Biological Processes	GO:0055088	lipid homeostasis	-3.8	1.9	4.1	-1.9		GO Biological Processes	GO:0090224	regulation of spindle organization	-4.1	3.1	4.7	-2.2
GO Biological Processes	GO:0006687	glycosphingolipid metabolic process	-3.8	2.7	4.4	-1.9		GO Biological Processes	GO:0060996	dendritic spine development	-4.1	2.1	4.3	-2.2
Reactome Gene Sets	R-MMU-1483257	Phospholipid metabolism	-3.8	1.7	4	-1.9		GO Biological Processes	GO:0090169	regulation of spindle assembly	-4.1	3.6	4.9	-2.2
GO Biological Processes	GO:0001558	regulation of cell growth	-3.8	1.5	3.9	-1.9		GO Biological Processes	GO:1904861	excitatory synapse assembly	-4.1	3.6	4.9	-2.2
GO Biological Processes	GO:0043405	regulation of MAP kinase activity	-3.8	1.6	3.9	-1.9		KEGG Pathway	mmu04530	Tight junction	-4.1	1.9	4.2	-2.2
GO Biological Processes	GO:0043408	regulation of MAPK cascade	-3.8	1.4	3.8	-1.9		GO Biological Processes	GO:0044380	protein localization to cytoskeleton	-4	2.7	4.5	-2.1
GO Biological Processes	GO:0009101	glycoprotein biosynthetic process	-3.7	1.6	3.9	-1.8		GO Biological Processes	GO:0046605	regulation of centrosome cycle	-4	2.7	4.5	-2.1
GO Biological Processes	GO:0009991	response to extracellular stimulus	-3.7	1.5	3.8	-1.8		GO Biological Processes	GO:0008542	visual learning	-4	2.6	4.5	-2.1
KEGG Pathway	mmu00010	Glycolysis / Gluconeogenesis	-3.7	2.3	4.2	-1.8		GO Biological Processes	GO:0032869	cellular response to insulin stimulus	-4	1.9	4.2	-2.1
GO Biological Processes	GO:0120035	regulation of plasma membrane bounded cell projection organization	-3.7	1.3	3.7	-1.8		GO Biological Processes	GO:0051705	multi-organism behavior	-4	2.5	4.4	-2.1
GO Biological Processes	GO:0019751	polyol metabolic process	-3.7	2	4	-1.8		Reactome Gene Sets	R-MMU-6794361	Neurexins and neuroligins	-4	3.4	4.7	-2.1
GO Biological Processes	GO:0097193	intrinsic apoptotic signaling pathway	-3.7	1.6	3.9	-1.8		GO Biological Processes	GO:0071539	protein localization to centrosome	-4	3.4	4.7	-2.1
Reactome Gene Sets	R-MMU-450302	activated TAK1 mediates p38 MAPK activation	-3.7	6.4	5.1	-1.8		GO Biological Processes	GO:0071331	cellular response to hexose stimulus	-4	2	4.3	-2.1
GO Biological Processes	GO:0009154	purine ribonucleotide catabolic process	-3.7	3.5	4.5	-1.8		GO Biological Processes	GO:0098597	observational learning	-4	6.2	5.4	-2.1
GO Biological Processes	GO:0009261	ribonucleotide catabolic process	-3.7	3.5	4.5	-1.8		GO Biological Processes	GO:0043401	steroid hormone mediated signaling pathway	-4	2.2	4.3	-2.1
GO Biological Processes	GO:0031329	regulation of cellular catabolic process	-3.7	1.4	3.7	-1.8		GO Biological Processes	GO:0060236	regulation of mitotic spindle organization	-4	3.2	4.7	-2.1
GO Biological Processes	GO:0042391	regulation of membrane potential	-3.7	1.5	3.8	-1.8		Reactome Gene Sets	R-MMU-5358351	Signaling by Hedgehog	-4	2.3	4.4	-2.1
GO Biological Processes	GO:0031344	regulation of cell projection organization	-3.7	1.3	3.7	-1.8		GO Biological Processes	GO:1902414	protein localization to cell junction	-4	4.6	5.1	-2.1
GO Biological Processes	GO:2001234	negative regulation of apoptotic signaling pathway	-3.7	1.7	3.9	-1.8		GO Biological Processes	GO:0010824	regulation of centrosome duplication	-4	3	4.6	-2.1
GO Biological Processes	GO:0043068	positive regulation of programmed cell death	-3.6	1.4	3.7	-1.8		GO Biological Processes	GO:0071326	cellular response to monosaccharide stimulus	-3.9	2	4.2	-2.1
Reactome Gene Sets	R-MMU-351202	Metabolism of polyamines	-3.6	2.8	4.2	-1.7		GO Biological Processes	GO:1904951	positive regulation of establishment of protein localization	-3.9	1.5	4	-2.1
GO Biological Processes	GO:0043065	positive regulation of apoptotic process	-3.6	1.4	3.7	-1.7		GO Biological Processes	GO:0072330	monocarboxylic acid biosynthetic process	-3.9	1.7	4.1	-2.1
Reactome Gene Sets	R-MMU-5673001	RAF/MAP kinase cascade	-3.6	1.7	3.8	-1.7		GO Biological Processes	GO:0032024	positive regulation of insulin secretion	-3.9	2.3	4.3	-2
GO Biological Processes	GO:0009311	oligosaccharide metabolic process	-3.6	2.9	4.2	-1.7		GO Biological Processes	GO:0045860	positive regulation of protein kinase activity	-3.9	1.5	4	-2
GO Biological Processes	GO:0006122	mitochondrial electron transport, ubiquinol to cytochrome c	-3.6	4.5	4.7	-1.7		GO Biological Processes	GO:0044270	cellular nitrogen compound catabolic process	-3.9	1.5	3.9	-2
CORUM	CORUM:440	Succinate dehydrogenase complex II, mitochondrial	-3.5	7.7	5.2	-1.7		GO Biological Processes	GO:0051056	regulation of small GTPase mediated signal transduction	-3.9	1.7	4	-2
GO Biological Processes	GO:0006564	L-serine biosynthetic process	-3.5	7.7	5.2	-1.7		GO Biological Processes	GO:0033674	positive regulation of kinase activity	-3.9	1.5	3.9	-2
GO Biological Processes	GO:0070585	protein localization to mitochondrion	-3.5	2	3.9	-1.7		GO Biological Processes	GO:0097120	receptor localization to synapse	-3.9	2.5	4.3	-2
CORUM	CORUM:3047	Parvulin-associated pre-rRNP complex	-3.5	2.5	4.1	-1.7		GO Biological Processes	GO:1905508	protein localization to microtubule organizing center	-3.9	3.3	4.6	-2
KEGG Pathway	mmu00510	N-Glycan biosynthesis	-3.5	2.5	4.1	-1.7		GO Biological Processes	GO:0030902	hindbrain development	-3.9	1.9	4.1	-2
GO Biological Processes	GO:0006734	NADH metabolic process	-3.5	3.1	4.3	-1.7		GO Biological Processes	GO:0070303	negative regulation of stress-activated protein kinase signaling cascade	-3.9	2.9	4.5	-2
GO Biological Processes	GO:0006195	purine nucleotide catabolic process	-3.5	3.1	4.3	-1.7		GO Biological Processes	GO:0032873	negative regulation of stress-activated MAPK cascade	-3.9	2.9	4.5	-2
KEGG Pathway	mmu00062	Fatty acid elongation	-3.5	3.1	4.3	-1.7		Reactome Gene Sets	R-MMU-373760	L1CAM interactions	-3.8	2.6	4.4	-2
GO Biological Processes	GO:0010821	regulation of mitochondrion organization	-3.5	1.9	3.8	-1.7		Reactome Gene Sets	R-MMU-1280218	Adaptive Immune System	-3.8	1.4	3.9	-2
GO Biological Processes	GO:0016052	carbohydrate catabolic process	-3.5	1.9	3.8	-1.7		GO Biological Processes	GO:0070861	regulation of protein exit from endoplasmic reticulum	-3.8	3.7	4.7	-2
GO Biological Processes	GO:0044743	protein transmembrane import into intracellular organelle	-3.5	2.7	4.1	-1.6		GO Biological Processes	GO:0001568	blood vessel development	-3.8	1.4	3.8	-2
GO Biological Processes	GO:0034599	cellular response to oxidative stress	-3.5	1.6	3.7	-1.6		GO Biological Processes	GO:0032868	response to insulin	-3.8	1.8	4	-2
GO Biological Processes	GO:1901361	organic cyclic compound catabolic process	-3.5	1.4	3.6	-1.6		GO Biological Processes	GO:0051048	negative regulation of secretion	-3.8	1.7	4	-2
KEGG Pathway	mmu00230	Purine metabolism	-3.5	1.7	3.8	-1.6		GO Biological Processes	GO:0007626	locomotory behavior	-3.8	1.7	4	-2
GO Biological Processes	GO:0031667	response to nutrient levels	-3.5	1.5	3.7	-1.6		GO Biological Processes	GO:0010506	regulation of autophagy	-3.8	1.7	4	-2
GO Biological Processes	GO:0046364	monosaccharide biosynthetic process	-3.5	2.1	3.9	-1.6		GO Biological Processes	GO:0044089	positive regulation of cellular component biogenesis	-3.8	1.5	3.9	-2
GO Biological Processes	GO:0031400	negative regulation of protein modification process	-3.5	1.4	3.6	-1.6		GO Biological Processes	GO:1903651	positive regulation of cytoplasmic transport	-3.8	5	5	-2
GO Biological Processes	GO:0021782	glial cell development	-3.4	2	3.8	-1.6		GO Biological Processes	GO:0045955	negative regulation of calcium ion-dependent exocytosis	-3.8	5	5	-2
GO Biological Processes	GO:0006744	ubiquinone biosynthetic process	-3.4	3.8	4.4	-1.6		Reactome Gene Sets	R-MMU-68884	Mitotic Telophase/Cytokinesis	-3.8	5	5	-2
GO Biological Processes	GO:1901663	quinone biosynthetic process	-3.4	3.8	4.4	-1.6		GO Biological Processes	GO:1905114	cell surface receptor signaling pathway involved in cell-cell signaling	-3.8	1.5	3.9	-1.9
GO Biological Processes	GO:0019439	aromatic compound catabolic process	-3.4	1.4	3.6	-1.6		GO Biological Processes	GO:0007632	visual behavior	-3.8	2.4	4.3	-1.9
GO Biological Processes	GO:0042180	cellular ketone metabolic process	-3.4	1.7	3.7	-1.6		GO Biological Processes	GO:1901673	regulation of mitotic spindle assembly	-3.8	4	4.7	-1.9
Reactome Gene Sets	R-MMU-446203	Asparagine N-linked glycosylation	-3.4	1.6	3.6	-1.6		GO Biological Processes	GO:0045446	endothelial cell differentiation	-3.8	2.1	4.1	-1.9
Reactome Gene Sets	R-MMU-70326	Glucose metabolism	-3.4	2.5	4	-1.6		GO Biological Processes	GO:0030865	cortical cytoskeleton organization	-3.8	2.8	4.4	-1.9
GO Biological Processes	GO:0006749	glutathione metabolic process	-3.4	2.5	4	-1.6		GO Biological Processes	GO:0006302	double-strand break repair	-3.8	1.8	4	-1.9
GO Biological Processes	GO:0033674	positive regulation of kinase activity	-3.4	1.4	3.6	-1.6		GO Biological Processes	GO:0000725	recombinational repair	-3.8	2	4.1	-1.9
Reactome Gene Sets	R-MMU-70614	Amino acid synthesis and interconversion (transamination)	-3.4	2.9	4.1	-1.6		GO Biological Processes	GO:0000724	double-strand break repair via homologous recombination	-3.8	2	4.1	-1.9
GO Biological Processes	GO:0016125	sterol metabolic process	-3.4	1.8	3.7	-1.6		GO Biological Processes	GO:0006342	chromatin silencing	-3.7	2.3	4.2	-1.9
GO Biological Processes	GO:0008630	intrinsic apoptotic signaling pathway in response to DNA damage	-3.4	1.9	3.8	-1.6		GO Biological Processes	GO:0001525	angiogenesis	-3.7	1.5	3.8	-1.9
Reactome Gene Sets	R-MMU-72689	Formation of a pool of free 40S subunits	-3.4	2.6	4	-1.5		GO Biological Processes	GO:0061179	negative regulation of insulin secretion involved in cellular response to glucose stimulus	-3.7	4.4	4.8	-1.9
Reactome Gene Sets	R-MMU-72613	Eukaryotic Translation Initiation	-3.4	2.3	3.9	-1.5		GO Biological Processes	GO:1903829	positive regulation of cellular protein localization	-3.7	1.6	3.9	-1.9
GO Biological Processes	GO:0045936	negative regulation of phosphate metabolic process	-3.4	1.4	3.5	-1.5		GO Biological Processes	GO:0018023	peptidyl-lysine trimethylation	-3.7	2.9	4.4	-1.9
GO Biological Processes	GO:0010563	negative regulation of phosphorus metabolic process	-3.4	1.4	3.5	-1.5		GO Biological Processes	GO:0048511	rhythmic process	-3.7	1.7	3.9	-1.9
GO Biological Processes	GO:0071900	regulation of protein serine/threonine kinase activity	-3.3	1.4	3.5	-1.5		GO Biological Processes	GO:1902903	regulation of supramolecular fiber organization	-3.7	1.6	3.9	-1.9
Reactome Gene Sets	R-MMU-196849	Metabolism of water-soluble vitamins and cofactors	-3.3	1.9	3.7	-1.5		GO Biological Processes	GO:0097106	postsynaptic density organization	-3.7	3.2	4.5	-1.9
GO Biological Processes	GO:0035384	thioester biosynthetic process	-3.3	3.2	4.2	-1.5		GO Biological Processes	GO:0046700	heterocycle catabolic process	-3.7	1.5	3.8	-1.9
GO Biological Processes	GO:0071616	acyl-CoA biosynthetic process	-3.3	3.2	4.2	-1.5		GO Biological Processes	GO:0009855	determination of bilateral symmetry	-3.7	2	4.1	-1.9
GO Biological Processes	GO:0006914	autophagy	-3.3	1.5	3.5	-1.5		GO Biological Processes	GO:0016239	positive regulation of macroautophagy	-3.7	2.5	4.2	-1.9
GO Biological Processes	GO:0061919	process utilizing autophagic mechanism	-3.3	1.5	3.5	-1.5		GO Biological Processes	GO:0031503	protein-containing complex localization	-3.7	1.7	3.9	-1.9
Reactome Gene Sets	R-MMU-5684996	MAPK1/MAPK3 signaling	-3.3	1.6	3.6	-1.5		GO Biological Processes	GO:0048514	blood vessel morphogenesis	-3.7	1.4	3.8	-1.9
GO Biological Processes	GO:2001243	negative regulation of intrinsic apoptotic signaling pathway	-3.3	2	3.7	-1.5		GO Biological Processes	GO:0051592	response to calcium ion	-3.7	2	4.1	-1.9
GO Biological Processes	GO:0043649	dicarboxylic acid catabolic process	-3.3	4.1	4.4	-1.5		GO Biological Processes	GO:1905477	positive regulation of protein localization to membrane	-3.7	2.2	4.1	-1.9
KEGG Pathway	mmu_M00087	beta-Oxidation	-3.3	4.1	4.4	-1.5		GO Biological Processes	GO:0034329	cell junction assembly	-3.7	1.8	3.9	-1.9
KEGG Pathway	M00087	beta-Oxidation	-3.3	4.1	4.4	-1.5		Reactome Gene Sets	R-MMU-9006925	Intracellular signaling by second messengers	-3.7	1.8	3.9	-1.9
GO Biological Processes	GO:0051881	regulation of mitochondrial membrane potential	-3.3	2.1	3.8	-1.5		GO Biological Processes	GO:0061061	muscle structure development	-3.7	1.4	3.8	-1.9
GO Biological Processes	GO:1901606	alpha-amino acid catabolic process	-3.3	2.1	3.8	-1.5		Reactome Gene Sets	R-MMU-194315	Signaling by Rho GTPases	-3.7	1.5	3.8	-1.9
GO Biological Processes	GO:0051828	entry into other organism involved in symbiotic interaction	-3.3	2.3	3.9	-1.5		GO Biological Processes	GO:0001505	regulation of neurotransmitter levels	-3.7	1.6	3.8	-1.9
GO Biological Processes	GO:0044409	entry into host	-3.3	2.3	3.9	-1.5		GO Biological Processes	GO:0009799	specification of symmetry	-3.7	2	4	-1.9
GO Biological Processes	GO:0030260	entry into host cell	-3.3	2.3	3.9	-1.5		GO Biological Processes	GO:1900078	positive regulation of cellular response to insulin stimulus	-3.7	3.6	4.5	-1.9
GO Biological Processes	GO:0051806	entry into cell of other organism involved in symbiotic interaction	-3.3	2.3	3.9	-1.5		GO Biological Processes	GO:0032528	microvillus organization	-3.7	3.6	4.5	-1.9
GO Biological Processes	GO:0042326	negative regulation of phosphorylation	-3.3	1.4	3.5	-1.5		GO Biological Processes	GO:1904893	negative regulation of STAT cascade	-3.7	3.6	4.5	-1.9
GO Biological Processes	GO:0010001	glial cell differentiation	-3.2	1.6	3.6	-1.5		GO Biological Processes	GO:0051783	regulation of nuclear division	-3.7	1.8	3.9	-1.9
GO Biological Processes	GO:0008203	cholesterol metabolic process	-3.2	1.8	3.7	-1.5		GO Biological Processes	GO:0032875	regulation of DNA endoreduplication	-3.6	5.6	5	-1.9
GO Biological Processes	GO:0034655	nucleobase-containing compound catabolic process	-3.2	1.4	3.5	-1.5		GO Biological Processes	GO:0043408	regulation of MAPK cascade	-3.6	1.4	3.7	-1.9
GO Biological Processes	GO:0046486	glycerolipid metabolic process	-3.2	1.5	3.5	-1.4		GO Biological Processes	GO:1904950	negative regulation of establishment of protein localization	-3.6	1.8	3.9	-1.9
GO Biological Processes	GO:0006689	ganglioside catabolic process	-3.2	5.5	4.6	-1.4		GO Biological Processes	GO:0050673	epithelial cell proliferation	-3.6	1.5	3.8	-1.9
GO Biological Processes	GO:0006108	malate metabolic process	-3.2	5.5	4.6	-1.4		KEGG Pathway	mmu05031	Amphetamine addiction	-3.6	2.5	4.2	-1.9
Reactome Gene Sets	R-MMU-111453	BH3-only proteins associate with and inactivate anti-apoptotic BCL-2 members	-3.2	5.5	4.6	-1.4		GO Biological Processes	GO:0051345	positive regulation of hydrolase activity	-3.6	1.5	3.7	-1.8
GO Biological Processes	GO:0046578	regulation of Ras protein signal transduction	-3.2	1.6	3.5	-1.4		GO Biological Processes	GO:0010921	regulation of phosphatase activity	-3.6	2	4	-1.8
GO Biological Processes	GO:0031274	positive regulation of pseudopodium assembly	-3.2	4.6	4.4	-1.4		GO Biological Processes	GO:0042551	neuron maturation	-3.6	2.6	4.2	-1.8
GO Biological Processes	GO:0001933	negative regulation of protein phosphorylation	-3.2	1.4	3.4	-1.4		GO Biological Processes	GO:0009791	post-embryonic development	-3.6	2	4	-1.8
GO Biological Processes	GO:0040008	regulation of growth	-3.2	1.3	3.4	-1.4		GO Biological Processes	GO:0014909	smooth muscle cell migration	-3.6	2.2	4.1	-1.8
GO Biological Processes	GO:0009179	purine ribonucleoside diphosphate metabolic process	-3.2	2	3.7	-1.4		GO Biological Processes	GO:0010827	regulation of glucose transmembrane transport	-3.6	2.3	4.1	-1.8
GO Biological Processes	GO:0009135	purine nucleoside diphosphate metabolic process	-3.2	2	3.7	-1.4		GO Biological Processes	GO:1903753	negative regulation of p38MAPK cascade	-3.6	6.6	5.2	-1.8
GO Biological Processes	GO:0046902	regulation of mitochondrial membrane permeability	-3.2	2.4	3.8	-1.4		Reactome Gene Sets	R-MMU-426496	Post-transcriptional silencing by small RNAs	-3.6	6.6	5.2	-1.8
GO Biological Processes	GO:0006677	glycosylceramide metabolic process	-3.2	3.6	4.2	-1.4		GO Biological Processes	GO:0032876	negative regulation of DNA endoreduplication	-3.6	6.6	5.2	-1.8
GO Biological Processes	GO:0006743	ubiquinone metabolic process	-3.2	3.6	4.2	-1.4		GO Biological Processes	GO:0099504	synaptic vesicle cycle	-3.6	1.7	3.9	-1.8
GO Biological Processes	GO:0051701	interaction with host	-3.2	1.9	3.6	-1.4		GO Biological Processes	GO:0071383	cellular response to steroid hormone stimulus	-3.6	1.9	3.9	-1.8
GO Biological Processes	GO:0046463	acylglycerol biosynthetic process	-3.2	2.6	3.9	-1.4		GO Biological Processes	GO:0043632	modification-dependent macromolecule catabolic process	-3.6	1.4	3.7	-1.8
GO Biological Processes	GO:0051181	cofactor transport	-3.2	2.6	3.9	-1.4		GO Biological Processes	GO:0008306	associative learning	-3.6	2.1	4	-1.8
GO Biological Processes	GO:0046460	neutral lipid biosynthetic process	-3.2	2.6	3.9	-1.4		GO Biological Processes	GO:0060997	dendritic spine morphogenesis	-3.5	2.4	4.1	-1.8
KEGG Pathway	mmu00531	Glycosaminoglycan degradation	-3.1	3.3	4.1	-1.4		GO Biological Processes	GO:0048592	eye morphogenesis	-3.5	1.8	3.9	-1.8
KEGG Pathway	mmu04260	Cardiac muscle contraction	-3.1	2.1	3.7	-1.4		GO Biological Processes	GO:0043900	regulation of multi-organism process	-3.5	1.5	3.7	-1.8
GO Biological Processes	GO:0032091	negative regulation of protein binding	-3.1	1.9	3.6	-1.4		GO Biological Processes	GO:0038092	nodal signaling pathway	-3.5	4.1	4.6	-1.8
Reactome Gene Sets	R-MMU-163841	Gamma carboxylation, hypusine formation and arylsulfatase activation	-3.1	2.7	3.9	-1.4		GO Biological Processes	GO:0043068	positive regulation of programmed cell death	-3.5	1.4	3.7	-1.8
GO Biological Processes	GO:0019319	hexose biosynthetic process	-3.1	2.1	3.7	-1.3		GO Biological Processes	GO:0050773	regulation of dendrite development	-3.5	1.8	3.8	-1.8
GO Biological Processes	GO:0046718	viral entry into host cell	-3.1	2.3	3.7	-1.3		GO Biological Processes	GO:0010948	negative regulation of cell cycle process	-3.5	1.7	3.8	-1.8
KEGG Pathway	mmu05418	Fluid shear stress and atherosclerosis	-3.1	1.7	3.5	-1.3		GO Biological Processes	GO:0044772	mitotic cell cycle phase transition	-3.5	1.6	3.7	-1.7
GO Biological Processes	GO:0051235	maintenance of location	-3.1	1.5	3.4	-1.3		GO Biological Processes	GO:0018107	peptidyl-threonine phosphorylation	-3.5	2	3.9	-1.7
Reactome Gene Sets	R-MMU-77289	Mitochondrial Fatty Acid Beta-Oxidation	-3	2.6	3.8	-1.3		GO Biological Processes	GO:0044257	cellular protein catabolic process	-3.5	1.4	3.6	-1.7
Reactome Gene Sets	R-MMU-3928665	EPH-ephrin mediated repulsion of cells	-3	2.8	3.9	-1.3		GO Biological Processes	GO:0030900	forebrain development	-3.5	1.5	3.7	-1.7
GO Biological Processes	GO:0046700	heterocycle catabolic process	-3	1.4	3.3	-1.3		GO Biological Processes	GO:0034198	cellular response to amino acid starvation	-3.5	2.9	4.2	-1.7
GO Biological Processes	GO:0097164	ammonium ion metabolic process	-3	1.7	3.4	-1.3		GO Biological Processes	GO:0044770	cell cycle phase transition	-3.5	1.5	3.7	-1.7
GO Biological Processes	GO:0044270	cellular nitrogen compound catabolic process	-3	1.4	3.3	-1.3		GO Biological Processes	GO:0002753	cytoplasmic pattern recognition receptor signaling pathway	-3.5	3	4.2	-1.7
GO Biological Processes	GO:0010720	positive regulation of cell development	-3	1.3	3.3	-1.3		Reactome Gene Sets	R-MMU-983168	Antigen processing: Ubiquitination & Proteasome degradation	-3.5	1.7	3.8	-1.7
Reactome Gene Sets	R-MMU-72695	Formation of the ternary complex, and subsequently, the 43S complex	-3	2.4	3.7	-1.3		GO Biological Processes	GO:0033002	muscle cell proliferation	-3.5	1.7	3.8	-1.7
GO Biological Processes	GO:0019674	NAD metabolic process	-3	2.4	3.7	-1.3		GO Biological Processes	GO:0043065	positive regulation of apoptotic process	-3.5	1.4	3.6	-1.7
GO Biological Processes	GO:0070129	regulation of mitochondrial translation	-3	3	3.9	-1.3		GO Biological Processes	GO:0045445	myoblast differentiation	-3.5	2.2	3.9	-1.7
GO Biological Processes	GO:0051604	protein maturation	-3	1.5	3.3	-1.3		GO Biological Processes	GO:0031103	axon regeneration	-3.5	2.6	4.1	-1.7
GO Biological Processes	GO:0071806	protein transmembrane transport	-3	2.2	3.6	-1.3		GO Biological Processes	GO:0034765	regulation of ion transmembrane transport	-3.4	1.5	3.6	-1.7
Reactome Gene Sets	R-MMU-72737	Cap-dependent Translation Initiation	-3	2.2	3.6	-1.3		GO Biological Processes	GO:0000280	nuclear division	-3.4	1.5	3.7	-1.7
GO Biological Processes	GO:0035272	exocrine system development	-3	2.3	3.6	-1.3		GO Biological Processes	GO:0009314	response to radiation	-3.4	1.5	3.7	-1.7
GO Biological Processes	GO:0046320	regulation of fatty acid oxidation	-3	2.6	3.7	-1.2		GO Biological Processes	GO:0010769	regulation of cell morphogenesis involved in differentiation	-3.4	1.6	3.7	-1.7
GO Biological Processes	GO:0032042	mitochondrial DNA metabolic process	-3	3.1	3.9	-1.2		GO Biological Processes	GO:0045596	negative regulation of cell differentiation	-3.4	1.4	3.6	-1.7
GO Biological Processes	GO:0007266	Rho protein signal transduction	-3	1.6	3.4	-1.2		GO Biological Processes	GO:0019941	modification-dependent protein catabolic process	-3.4	1.4	3.6	-1.7
GO Biological Processes	GO:0015748	organophosphate ester transport	-3	2	3.5	-1.2		GO Biological Processes	GO:0006109	regulation of carbohydrate metabolic process	-3.4	1.8	3.8	-1.7
GO Biological Processes	GO:0043410	positive regulation of MAPK cascade	-3	1.4	3.2	-1.2		GO Biological Processes	GO:0034332	adherens junction organization	-3.4	2	3.9	-1.7
GO Biological Processes	GO:0009132	nucleoside diphosphate metabolic process	-2.9	1.8	3.4	-1.2		GO Biological Processes	GO:1903078	positive regulation of protein localization to plasma membrane	-3.4	2.5	4	-1.7
GO Biological Processes	GO:1902652	secondary alcohol metabolic process	-2.9	1.8	3.4	-1.2		GO Biological Processes	GO:0007018	microtubule-based movement	-3.4	1.6	3.7	-1.7
KEGG Pathway	mmu00260	Glycine, serine and threonine metabolism	-2.9	2.5	3.7	-1.2		GO Biological Processes	GO:0034655	nucleobase-containing compound catabolic process	-3.4	1.5	3.6	-1.7
KEGG Pathway	mmu04975	Fat digestion and absorption	-2.9	2.5	3.7	-1.2		GO Biological Processes	GO:0036010	protein localization to endosome	-3.4	3.6	4.4	-1.7
GO Biological Processes	GO:0050808	synapse organization	-2.9	1.4	3.2	-1.2		Reactome Gene Sets	R-MMU-112316	Neuronal System	-3.4	1.6	3.7	-1.7
GO Biological Processes	GO:0043276	anoikis	-2.9	2.7	3.7	-1.2		GO Biological Processes	GO:0000819	sister chromatid segregation	-3.4	1.8	3.8	-1.7
GO Biological Processes	GO:0009185	ribonucleoside diphosphate metabolic process	-2.9	1.9	3.4	-1.2		GO Biological Processes	GO:0048285	organelle fission	-3.4	1.5	3.6	-1.7
GO Biological Processes	GO:0033539	fatty acid beta-oxidation using acyl-CoA dehydrogenase	-2.9	4.2	4.1	-1.2		GO Biological Processes	GO:0006402	mRNA catabolic process	-3.4	1.7	3.7	-1.7
GO Biological Processes	GO:0031272	regulation of pseudopodium assembly	-2.9	4.2	4.1	-1.2		GO Biological Processes	GO:0032200	telomere organization	-3.4	2	3.8	-1.7
GO Biological Processes	GO:0009125	nucleoside monophosphate catabolic process	-2.9	4.2	4.1	-1.2		GO Biological Processes	GO:1903363	negative regulation of cellular protein catabolic process	-3.4	2.2	3.9	-1.7
GO Biological Processes	GO:0006107	oxaloacetate metabolic process	-2.9	4.2	4.1	-1.2		GO Biological Processes	GO:0051222	positive regulation of protein transport	-3.4	1.5	3.6	-1.7
GO Biological Processes	GO:0051646	mitochondrion localization	-2.9	2.4	3.6	-1.2		GO Biological Processes	GO:0098655	cation transmembrane transport	-3.4	1.4	3.5	-1.7
GO Biological Processes	GO:0062012	regulation of small molecule metabolic process	-2.9	1.4	3.2	-1.2		GO Biological Processes	GO:0042594	response to starvation	-3.4	1.8	3.7	-1.7
GO Biological Processes	GO:0030205	dermatan sulfate metabolic process	-2.9	6.1	4.5	-1.2		GO Biological Processes	GO:0071363	cellular response to growth factor stimulus	-3.4	1.4	3.5	-1.7
GO Biological Processes	GO:0042776	mitochondrial ATP synthesis coupled proton transport	-2.9	6.1	4.5	-1.2		GO Biological Processes	GO:1904659	glucose transmembrane transport	-3.4	2.1	3.8	-1.7
GO Biological Processes	GO:0075525	viral translational termination-reinitiation	-2.9	6.1	4.5	-1.2		GO Biological Processes	GO:0098698	postsynaptic specialization assembly	-3.4	3.3	4.3	-1.7
Reactome Gene Sets	R-MMU-382551	Transport of small molecules	-2.9	1.3	3.2	-1.2		GO Biological Processes	GO:0006511	ubiquitin-dependent protein catabolic process	-3.3	1.4	3.5	-1.6
GO Biological Processes	GO:2001242	regulation of intrinsic apoptotic signaling pathway	-2.9	1.7	3.3	-1.2		GO Biological Processes	GO:0070570	regulation of neuron projection regeneration	-3.3	2.9	4.1	-1.6
Reactome Gene Sets	R-MMU-9006934	Signaling by Receptor Tyrosine Kinases	-2.9	1.4	3.2	-1.2		GO Biological Processes	GO:0042023	DNA endoreduplication	-3.3	5.1	4.7	-1.6
GO Biological Processes	GO:0010810	regulation of cell-substrate adhesion	-2.9	1.6	3.3	-1.2		GO Biological Processes	GO:0007507	heart development	-3.3	1.4	3.5	-1.6
GO Biological Processes	GO:0051129	negative regulation of cellular component organization	-2.9	1.3	3.2	-1.2		GO Biological Processes	GO:0003158	endothelium development	-3.3	2	3.8	-1.6
GO Biological Processes	GO:0070997	neuron death	-2.9	1.4	3.2	-1.2		GO Biological Processes	GO:0097479	synaptic vesicle localization	-3.3	1.8	3.7	-1.6
GO Biological Processes	GO:0009158	ribonucleoside monophosphate catabolic process	-2.8	4.8	4.2	-1.1		GO Biological Processes	GO:0018205	peptidyl-lysine modification	-3.3	1.6	3.6	-1.6
GO Biological Processes	GO:0009169	purine ribonucleoside monophosphate catabolic process	-2.8	4.8	4.2	-1.1		GO Biological Processes	GO:0071407	cellular response to organic cyclic compound	-3.3	1.5	3.6	-1.6
Reactome Gene Sets	R-MMU-8854050	FBXL7 down-regulates AURKA during mitotic entry and in early mitosis	-2.8	4.8	4.2	-1.1		GO Biological Processes	GO:0006338	chromatin remodeling	-3.3	1.9	3.8	-1.6
Reactome Gene Sets	R-MMU-171007	p38MAPK events	-2.8	4.8	4.2	-1.1		GO Biological Processes	GO:0007265	Ras protein signal transduction	-3.3	1.5	3.6	-1.6
GO Biological Processes	GO:0007431	salivary gland development	-2.8	2.4	3.6	-1.1		GO Biological Processes	GO:0051650	establishment of vesicle localization	-3.3	1.6	3.6	-1.6
GO Biological Processes	GO:0006664	glycolipid metabolic process	-2.8	2	3.4	-1.1		GO Biological Processes	GO:1902806	regulation of cell cycle G1/S phase transition	-3.3	2	3.8	-1.6
GO Biological Processes	GO:0035461	vitamin transmembrane transport	-2.8	3.6	3.9	-1.1		GO Biological Processes	GO:0048659	smooth muscle cell proliferation	-3.3	1.8	3.7	-1.6
GO Biological Processes	GO:0071243	cellular response to arsenic-containing substance	-2.8	3.6	3.9	-1.1		GO Biological Processes	GO:1900076	regulation of cellular response to insulin stimulus	-3.3	2.2	3.8	-1.6
Reactome Gene Sets	R-MMU-200425	Import of palmitoyl-CoA into the mitochondrial matrix	-2.8	3.6	3.9	-1.1		GO Biological Processes	GO:1904377	positive regulation of protein localization to cell periphery	-3.3	2.4	3.9	-1.6
GO Biological Processes	GO:0007040	lysosome organization	-2.8	2.1	3.5	-1.1		GO Biological Processes	GO:0051054	positive regulation of DNA metabolic process	-3.3	1.7	3.6	-1.6
GO Biological Processes	GO:0080171	lytic vacuole organization	-2.8	2.1	3.5	-1.1		GO Biological Processes	GO:2001252	positive regulation of chromosome organization	-3.3	1.8	3.7	-1.6
GO Biological Processes	GO:0034767	positive regulation of ion transmembrane transport	-2.8	1.6	3.2	-1.1		GO Biological Processes	GO:0120032	regulation of plasma membrane bounded cell projection assembly	-3.3	1.8	3.7	-1.6
GO Biological Processes	GO:0008202	steroid metabolic process	-2.8	1.5	3.2	-1.1		Reactome Gene Sets	R-MMU-2565942	Regulation of PLK1 Activity at G2/M Transition	-3.3	2.2	3.9	-1.6
GO Biological Processes	GO:0060560	developmental growth involved in morphogenesis	-2.8	1.5	3.2	-1.1		GO Biological Processes	GO:0045913	positive regulation of carbohydrate metabolic process	-3.3	2.2	3.9	-1.6
GO Biological Processes	GO:0016999	antibiotic metabolic process	-2.8	1.7	3.3	-1.1		KEGG Pathway	mmu04917	Prolactin signaling pathway	-3.3	2.3	3.9	-1.6
GO Biological Processes	GO:0002931	response to ischemia	-2.8	2.6	3.6	-1.1		KEGG Pathway	mmu04931	Insulin resistance	-3.3	2	3.8	-1.6
GO Biological Processes	GO:0006767	water-soluble vitamin metabolic process	-2.8	2.6	3.6	-1.1		GO Biological Processes	GO:0008645	hexose transmembrane transport	-3.3	2	3.8	-1.6
GO Biological Processes	GO:0006536	glutamate metabolic process	-2.8	2.6	3.6	-1.1		GO Biological Processes	GO:0014070	response to organic cyclic compound	-3.3	1.4	3.5	-1.6
GO Biological Processes	GO:0007584	response to nutrient	-2.8	1.9	3.3	-1.1		GO Biological Processes	GO:0008286	insulin receptor signaling pathway	-3.3	2	3.8	-1.6
GO Biological Processes	GO:0046031	ADP metabolic process	-2.8	1.9	3.3	-1.1		GO Biological Processes	GO:0031347	regulation of defense response	-3.3	1.4	3.5	-1.6
GO Biological Processes	GO:1901214	regulation of neuron death	-2.8	1.4	3.1	-1.1		GO Biological Processes	GO:0040017	positive regulation of locomotion	-3.3	1.4	3.5	-1.6
GO Biological Processes	GO:0042063	gliogenesis	-2.8	1.5	3.1	-1.1		GO Biological Processes	GO:0043470	regulation of carbohydrate catabolic process	-3.3	2.5	3.9	-1.6
GO Biological Processes	GO:0043270	positive regulation of ion transport	-2.8	1.5	3.1	-1.1		GO Biological Processes	GO:0006479	protein methylation	-3.3	1.8	3.7	-1.6
GO Biological Processes	GO:0072657	protein localization to membrane	-2.8	1.3	3.1	-1.1		GO Biological Processes	GO:0008213	protein alkylation	-3.3	1.8	3.7	-1.6
GO Biological Processes	GO:1903509	liposaccharide metabolic process	-2.7	1.9	3.3	-1.1		GO Biological Processes	GO:0022037	metencephalon development	-3.3	2	3.7	-1.6
KEGG Pathway	mmu00564	Glycerophospholipid metabolism	-2.7	1.9	3.3	-1.1		GO Biological Processes	GO:0019439	aromatic compound catabolic process	-3.3	1.5	3.5	-1.6
KEGG Pathway	mmu00250	Alanine, aspartate and glutamate metabolism	-2.7	2.5	3.5	-1.1		GO Biological Processes	GO:0051495	positive regulation of cytoskeleton organization	-3.3	1.7	3.6	-1.6
Reactome Gene Sets	R-MMU-2682334	EPH-Ephrin signaling	-2.7	2.1	3.4	-1.1		KEGG Pathway	mmu04024	cAMP signaling pathway	-3.3	1.7	3.6	-1.6
GO Biological Processes	GO:0060445	branching involved in salivary gland morphogenesis	-2.7	2.7	3.6	-1.1		GO Biological Processes	GO:0051224	negative regulation of protein transport	-3.2	1.7	3.6	-1.6
Reactome Gene Sets	R-MMU-70263	Gluconeogenesis	-2.7	2.7	3.6	-1.1		GO Biological Processes	GO:0050995	negative regulation of lipid catabolic process	-3.2	3.5	4.2	-1.6
GO Biological Processes	GO:0010883	regulation of lipid storage	-2.7	2.4	3.5	-1.1		GO Biological Processes	GO:0009416	response to light stimulus	-3.2	1.6	3.6	-1.6
GO Biological Processes	GO:0007528	neuromuscular junction development	-2.7	2.2	3.4	-1		GO Biological Processes	GO:0060249	anatomical structure homeostasis	-3.2	1.5	3.5	-1.6
GO Biological Processes	GO:0006457	protein folding	-2.7	1.7	3.2	-1		GO Biological Processes	GO:0048286	lung alveolus development	-3.2	2.4	3.9	-1.6
Reactome Gene Sets	R-MMU-1660661	Sphingolipid de novo biosynthesis	-2.7	2.3	3.4	-1		Reactome Gene Sets	R-MMU-109582	Hemostasis	-3.2	1.4	3.5	-1.6
GO Biological Processes	GO:0008654	phospholipid biosynthetic process	-2.7	1.7	3.2	-1		Reactome Gene Sets	R-MMU-73887	Death Receptor Signalling	-3.2	2	3.7	-1.6
GO Biological Processes	GO:0043409	negative regulation of MAPK cascade	-2.7	1.6	3.2	-1		GO Biological Processes	GO:0048660	regulation of smooth muscle cell proliferation	-3.2	1.8	3.6	-1.6
GO Biological Processes	GO:0051056	regulation of small GTPase mediated signal transduction	-2.7	1.5	3.1	-1		GO Biological Processes	GO:0043525	positive regulation of neuron apoptotic process	-3.2	2.2	3.8	-1.6
GO Biological Processes	GO:0072331	signal transduction by p53 class mediator	-2.7	1.7	3.2	-1		GO Biological Processes	GO:0009267	cellular response to starvation	-3.2	1.9	3.7	-1.6
GO Biological Processes	GO:0051347	positive regulation of transferase activity	-2.7	1.3	3	-1		GO Biological Processes	GO:0007224	smoothened signaling pathway	-3.2	1.9	3.7	-1.6
GO Biological Processes	GO:0043407	negative regulation of MAP kinase activity	-2.7	2	3.3	-1		GO Biological Processes	GO:0045930	negative regulation of mitotic cell cycle	-3.2	1.7	3.6	-1.6
GO Biological Processes	GO:0046685	response to arsenic-containing substance	-2.7	2.9	3.6	-1		GO Biological Processes	GO:0007219	Notch signaling pathway	-3.2	1.8	3.6	-1.6
Reactome Gene Sets	R-MMU-1592230	Mitochondrial biogenesis	-2.7	2.9	3.6	-1		GO Biological Processes	GO:0048679	regulation of axon regeneration	-3.2	3	4.1	-1.6
GO Biological Processes	GO:0034311	diol metabolic process	-2.7	2.9	3.6	-1		GO Biological Processes	GO:0030518	intracellular steroid hormone receptor signaling pathway	-3.2	2	3.7	-1.6
GO Biological Processes	GO:0019064	fusion of virus membrane with host plasma membrane	-2.7	7.7	4.5	-1		GO Biological Processes	GO:0021549	cerebellum development	-3.2	2	3.7	-1.6
Reactome Gene Sets	R-MMU-352238	Breakdown of the nuclear lamina	-2.7	7.7	4.5	-1		GO Biological Processes	GO:0060491	regulation of cell projection assembly	-3.2	1.8	3.6	-1.6
GO Biological Processes	GO:0009397	folic acid-containing compound catabolic process	-2.7	7.7	4.5	-1		GO Biological Processes	GO:0060287	epithelial cilium movement involved in determination of left/right asymmetry	-3.2	5.8	4.7	-1.6
GO Biological Processes	GO:0044800	multi-organism membrane fusion	-2.7	7.7	4.5	-1		GO Biological Processes	GO:0071804	cellular potassium ion transport	-3.2	1.7	3.6	-1.6
GO Biological Processes	GO:0042560	pteridine-containing compound catabolic process	-2.7	7.7	4.5	-1		GO Biological Processes	GO:0071805	potassium ion transmembrane transport	-3.2	1.7	3.6	-1.6
KEGG Pathway	M00020	Serine biosynthesis, glycerate-3P => serine	-2.7	7.7	4.5	-1		GO Biological Processes	GO:0045053	protein retention in Golgi apparatus	-3.2	7.4	5	-1.6
GO Biological Processes	GO:0046947	hydroxylysine biosynthetic process	-2.7	7.7	4.5	-1		GO Biological Processes	GO:0040029	regulation of gene expression, epigenetic	-3.2	1.6	3.5	-1.6
GO Biological Processes	GO:0006533	aspartate catabolic process	-2.7	7.7	4.5	-1		GO Biological Processes	GO:0051196	regulation of coenzyme metabolic process	-3.2	2.5	3.9	-1.5
GO Biological Processes	GO:0006106	fumarate metabolic process	-2.7	7.7	4.5	-1		GO Biological Processes	GO:0015749	monosaccharide transmembrane transport	-3.2	2	3.7	-1.5
KEGG Pathway	mmu_M00020	Serine biosynthesis, glycerate-3P => serine	-2.7	7.7	4.5	-1		GO Biological Processes	GO:0030033	microvillus assembly	-3.2	3.7	4.2	-1.5
GO Biological Processes	GO:0046946	hydroxylysine metabolic process	-2.7	7.7	4.5	-1		GO Biological Processes	GO:0031102	neuron projection regeneration	-3.2	2.4	3.8	-1.5
GO Biological Processes	GO:0039663	membrane fusion involved in viral entry into host cell	-2.7	7.7	4.5	-1		GO Biological Processes	GO:0061951	establishment of protein localization to plasma membrane	-3.2	2.4	3.8	-1.5
GO Biological Processes	GO:0030208	dermatan sulfate biosynthetic process	-2.7	7.7	4.5	-1		GO Biological Processes	GO:0090068	positive regulation of cell cycle process	-3.2	1.6	3.5	-1.5
GO Biological Processes	GO:0070681	glutaminyl-tRNAGln biosynthesis via transamidation	-2.7	7.7	4.5	-1		GO Biological Processes	GO:0032102	negative regulation of response to external stimulus	-3.2	1.5	3.5	-1.5
GO Biological Processes	GO:0002337	B-1a B cell differentiation	-2.7	7.7	4.5	-1		Reactome Gene Sets	R-MMU-68877	Mitotic Prometaphase	-3.1	1.7	3.5	-1.5
GO Biological Processes	GO:0009068	aspartate family amino acid catabolic process	-2.7	3.8	3.8	-1		GO Biological Processes	GO:0007368	determination of left/right symmetry	-3.1	1.9	3.6	-1.5
GO Biological Processes	GO:0031668	cellular response to extracellular stimulus	-2.6	1.5	3.1	-1		GO Biological Processes	GO:0000723	telomere maintenance	-3.1	1.9	3.6	-1.5
Reactome Gene Sets	R-MMU-3371453	Regulation of HSF1-mediated heat shock response	-2.6	2.1	3.3	-1		GO Biological Processes	GO:0061001	regulation of dendritic spine morphogenesis	-3.1	2.5	3.8	-1.5
GO Biological Processes	GO:0010811	positive regulation of cell-substrate adhesion	-2.6	1.7	3.2	-1		GO Biological Processes	GO:0034219	carbohydrate transmembrane transport	-3.1	2	3.6	-1.5
Reactome Gene Sets	R-MMU-8953854	Metabolism of RNA	-2.6	1.4	3	-1		GO Biological Processes	GO:0006260	DNA replication	-3.1	1.6	3.5	-1.5
GO Biological Processes	GO:0042149	cellular response to glucose starvation	-2.6	2.4	3.4	-1		GO Biological Processes	GO:0030155	regulation of cell adhesion	-3.1	1.4	3.4	-1.5
GO Biological Processes	GO:0065002	intracellular protein transmembrane transport	-2.6	2.1	3.3	-1		GO Biological Processes	GO:1903649	regulation of cytoplasmic transport	-3.1	3.3	4.1	-1.5
GO Biological Processes	GO:0043954	cellular component maintenance	-2.6	2.1	3.3	-1		GO Biological Processes	GO:0086019	cell-cell signaling involved in cardiac conduction	-3.1	3.3	4.1	-1.5
GO Biological Processes	GO:0009267	cellular response to starvation	-2.6	1.7	3.1	-1		GO Biological Processes	GO:0030325	adrenal gland development	-3.1	3.3	4.1	-1.5
Reactome Gene Sets	R-MMU-156827	L13a-mediated translational silencing of Ceruloplasmin expression	-2.6	2.2	3.3	-1		GO Biological Processes	GO:0046426	negative regulation of JAK-STAT cascade	-3.1	3.3	4.1	-1.5
GO Biological Processes	GO:0072527	pyrimidine-containing compound metabolic process	-2.6	2.2	3.3	-1		GO Biological Processes	GO:1903320	regulation of protein modification by small protein conjugation or removal	-3.1	1.7	3.5	-1.5
Reactome Gene Sets	R-MMU-163210	Formation of ATP by chemiosmotic coupling	-2.6	3.4	3.7	-1		GO Biological Processes	GO:0014812	muscle cell migration	-3.1	2	3.6	-1.5
Reactome Gene Sets	R-MMU-196757	Metabolism of folate and pterines	-2.6	3.4	3.7	-1		GO Biological Processes	GO:0045926	negative regulation of growth	-3.1	1.6	3.5	-1.5
KEGG Pathway	mmu_M00075	N-glycan biosynthesis, complex type	-2.6	3.4	3.7	-1		GO Biological Processes	GO:0098813	nuclear chromosome segregation	-3.1	1.6	3.5	-1.5
Reactome Gene Sets	R-MMU-8949613	Cristae formation	-2.6	3.4	3.7	-1		GO Biological Processes	GO:0070986	left/right axis specification	-3.1	4.6	4.4	-1.5
GO Biological Processes	GO:0006103	2-oxoglutarate metabolic process	-2.6	3.4	3.7	-1		GO Biological Processes	GO:1902946	protein localization to early endosome	-3.1	4.6	4.4	-1.5
KEGG Pathway	M00089	Triacylglycerol biosynthesis	-2.6	3.4	3.7	-1		GO Biological Processes	GO:0001667	ameboidal-type cell migration	-3.1	1.5	3.4	-1.5
KEGG Pathway	mmu_M00089	Triacylglycerol biosynthesis	-2.6	3.4	3.7	-1		GO Biological Processes	GO:0010631	epithelial cell migration	-3.1	1.6	3.4	-1.5
GO Biological Processes	GO:0030322	stabilization of membrane potential	-2.6	3.4	3.7	-1		GO Biological Processes	GO:0007623	circadian rhythm	-3.1	1.7	3.5	-1.5
GO Biological Processes	GO:0042407	cristae formation	-2.6	3.4	3.7	-1		GO Biological Processes	GO:0099645	neurotransmitter receptor localization to postsynaptic specialization membrane	-3.1	3.1	4	-1.5
KEGG Pathway	M00075	N-glycan biosynthesis, complex type	-2.6	3.4	3.7	-1		GO Biological Processes	GO:0099633	protein localization to postsynaptic specialization membrane	-3.1	3.1	4	-1.5
GO Biological Processes	GO:0000463	maturation of LSU-rRNA from tricistronic rRNA transcript (SSU-rRNA, 5.8S rRNA, LSU-rRNA)	-2.6	3.4	3.7	-1		GO Biological Processes	GO:0010922	positive regulation of phosphatase activity	-3.1	3.1	4	-1.5
GO Biological Processes	GO:0042771	intrinsic apoptotic signaling pathway in response to DNA damage by p53 class mediator	-2.6	2.3	3.4	-1		GO Biological Processes	GO:0090066	regulation of anatomical structure size	-3.1	1.4	3.4	-1.5
GO Biological Processes	GO:0045834	positive regulation of lipid metabolic process	-2.6	1.6	3.1	-1		Reactome Gene Sets	R-MMU-3214841	PKMTs methylate histone lysines	-3.1	2.4	3.7	-1.5
GO Biological Processes	GO:0051051	negative regulation of transport	-2.6	1.3	3	-1		GO Biological Processes	GO:2001169	regulation of ATP biosynthetic process	-3.1	2.4	3.7	-1.5
GO Biological Processes	GO:0042632	cholesterol homeostasis	-2.6	1.9	3.2	-1		GO Biological Processes	GO:0001655	urogenital system development	-3.1	1.5	3.4	-1.5
GO Biological Processes	GO:0014902	myotube differentiation	-2.6	1.7	3.1	-0.99		GO Biological Processes	GO:0043087	regulation of GTPase activity	-3.1	1.6	3.4	-1.5
GO Biological Processes	GO:0045664	regulation of neuron differentiation	-2.6	1.3	2.9	-0.99		Reactome Gene Sets	R-MMU-380284	Loss of proteins required for interphase microtubule organization from the centrosome	-3.1	2.3	3.7	-1.5
GO Biological Processes	GO:0051260	protein homooligomerization	-2.6	1.4	3	-0.99		Reactome Gene Sets	R-MMU-380259	Loss of Nlp from mitotic centrosomes	-3.1	2.3	3.7	-1.5
Reactome Gene Sets	R-MMU-446193	Biosynthesis of the N-glycan precursor (dolichol lipid-linked oligosaccharide, LLO) and transfer to	-2.6	2	3.2	-0.98		GO Biological Processes	GO:0030335	positive regulation of cell migration	-3.1	1.4	3.3	-1.5
GO Biological Processes	GO:1903859	regulation of dendrite extension	-2.6	2.6	3.4	-0.98		GO Biological Processes	GO:0051603	proteolysis involved in cellular protein catabolic process	-3.1	1.4	3.3	-1.5
Reactome Gene Sets	R-MMU-389661	Glyoxylate metabolism and glycine degradation	-2.6	2.6	3.4	-0.98		GO Biological Processes	GO:1990928	response to amino acid starvation	-3.1	2.6	3.8	-1.5
GO Biological Processes	GO:0032414	positive regulation of ion transmembrane transporter activity	-2.6	1.8	3.1	-0.97		GO Biological Processes	GO:0090596	sensory organ morphogenesis	-3.1	1.6	3.4	-1.5
GO Biological Processes	GO:0009451	RNA modification	-2.6	1.7	3.1	-0.97		GO Biological Processes	GO:0018210	peptidyl-threonine modification	-3	1.9	3.5	-1.4
GO Biological Processes	GO:0090559	regulation of membrane permeability	-2.6	2	3.2	-0.96		GO Biological Processes	GO:0043405	regulation of MAP kinase activity	-3	1.6	3.4	-1.4
GO Biological Processes	GO:0010506	regulation of autophagy	-2.6	1.5	3	-0.96		GO Biological Processes	GO:0090277	positive regulation of peptide hormone secretion	-3	1.9	3.6	-1.4
GO Biological Processes	GO:0032006	regulation of TOR signaling	-2.6	1.8	3.1	-0.96		GO Biological Processes	GO:0010508	positive regulation of autophagy	-3	1.9	3.6	-1.4
GO Biological Processes	GO:0006739	NADP metabolic process	-2.5	2.5	3.4	-0.95		Reactome Gene Sets	R-MMU-186797	Signaling by PDGF	-3	2.5	3.8	-1.4
GO Biological Processes	GO:0000002	mitochondrial genome maintenance	-2.5	2.5	3.4	-0.95		GO Biological Processes	GO:0051272	positive regulation of cellular component movement	-3	1.4	3.3	-1.4
GO Biological Processes	GO:0055092	sterol homeostasis	-2.5	1.9	3.1	-0.95		GO Biological Processes	GO:0016458	gene silencing	-3	1.6	3.4	-1.4
GO Biological Processes	GO:0006563	L-serine metabolic process	-2.5	4.3	3.8	-0.94		GO Biological Processes	GO:0099084	postsynaptic specialization organization	-3	2.7	3.8	-1.4
GO Biological Processes	GO:0060677	ureteric bud elongation	-2.5	4.3	3.8	-0.94		GO Biological Processes	GO:0090132	epithelium migration	-3	1.6	3.4	-1.4
Reactome Gene Sets	R-MMU-77286	mitochondrial fatty acid beta-oxidation of saturated fatty acids	-2.5	4.3	3.8	-0.94		GO Biological Processes	GO:1904062	regulation of cation transmembrane transport	-3	1.5	3.4	-1.4
GO Biological Processes	GO:0006681	galactosylceramide metabolic process	-2.5	4.3	3.8	-0.94		GO Biological Processes	GO:0031646	positive regulation of neurological system process	-3	2.1	3.6	-1.4
GO Biological Processes	GO:0006560	proline metabolic process	-2.5	4.3	3.8	-0.94		GO Biological Processes	GO:1903311	regulation of mRNA metabolic process	-3	1.6	3.4	-1.4
GO Biological Processes	GO:0006012	galactose metabolic process	-2.5	4.3	3.8	-0.94		Reactome Gene Sets	R-MMU-5683057	MAPK family signaling cascades	-3	1.7	3.4	-1.4
GO Biological Processes	GO:0009128	purine nucleoside monophosphate catabolic process	-2.5	4.3	3.8	-0.94		Reactome Gene Sets	R-MMU-1280215	Cytokine Signaling in Immune system	-3	1.4	3.3	-1.4
GO Biological Processes	GO:0072523	purine-containing compound catabolic process	-2.5	2.4	3.3	-0.93		GO Biological Processes	GO:0048814	regulation of dendrite morphogenesis	-3	2	3.5	-1.4
GO Biological Processes	GO:1902230	negative regulation of intrinsic apoptotic signaling pathway in response to DNA damage	-2.5	2.8	3.4	-0.93		GO Biological Processes	GO:2000045	regulation of G1/S transition of mitotic cell cycle	-3	2	3.5	-1.4
Reactome Gene Sets	R-MMU-975576	N-glycan antennae elongation in the medial/trans-Golgi	-2.5	2.8	3.4	-0.93		GO Biological Processes	GO:0046626	regulation of insulin receptor signaling pathway	-3	2.2	3.6	-1.4
KEGG Pathway	mmu00562	Inositol phosphate metabolism	-2.5	2	3.2	-0.93		GO Biological Processes	GO:1903322	positive regulation of protein modification by small protein conjugation or removal	-3	1.9	3.5	-1.4
GO Biological Processes	GO:0006094	gluconeogenesis	-2.5	2	3.2	-0.93		GO Biological Processes	GO:0017156	calcium ion regulated exocytosis	-3	1.7	3.5	-1.4
GO Biological Processes	GO:0043244	regulation of protein complex disassembly	-2.5	1.7	3.1	-0.92		GO Biological Processes	GO:0030336	negative regulation of cell migration	-3	1.6	3.4	-1.4
GO Biological Processes	GO:0043467	regulation of generation of precursor metabolites and energy	-2.5	1.7	3.1	-0.92		GO Biological Processes	GO:2001032	regulation of double-strand break repair via nonhomologous end joining	-3	3.5	4	-1.4
GO Biological Processes	GO:0032411	positive regulation of transporter activity	-2.5	1.7	3.1	-0.92		GO Biological Processes	GO:0051197	positive regulation of coenzyme metabolic process	-3	3.5	4	-1.4
Reactome Gene Sets	R-MMU-8957275	Post-translational protein phosphorylation	-2.5	1.7	3	-0.91		GO Biological Processes	GO:0030813	positive regulation of nucleotide catabolic process	-3	3.5	4	-1.4
GO Biological Processes	GO:0006469	negative regulation of protein kinase activity	-2.5	1.6	3	-0.91		GO Biological Processes	GO:0045444	fat cell differentiation	-3	1.6	3.4	-1.4
Reactome Gene Sets	R-MMU-9033241	Peroxisomal protein import	-2.5	2	3.2	-0.91		GO Biological Processes	GO:0046329	negative regulation of JNK cascade	-3	2.8	3.8	-1.4
GO Biological Processes	GO:0031589	cell-substrate adhesion	-2.5	1.4	2.9	-0.9		GO Biological Processes	GO:0098662	inorganic cation transmembrane transport	-3	1.4	3.3	-1.4
KEGG Pathway	mmu00240	Pyrimidine metabolism	-2.5	1.8	3.1	-0.9		GO Biological Processes	GO:0002683	negative regulation of immune system process	-3	1.4	3.3	-1.4
GO Biological Processes	GO:0010866	regulation of triglyceride biosynthetic process	-2.5	2.9	3.4	-0.9		GO Biological Processes	GO:0016071	mRNA metabolic process	-3	1.4	3.3	-1.4
GO Biological Processes	GO:0046339	diacylglycerol metabolic process	-2.5	2.9	3.4	-0.9		Reactome Gene Sets	R-MMU-380320	Recruitment of NuMA to mitotic centrosomes	-3	2.1	3.6	-1.4
GO Biological Processes	GO:2000209	regulation of anoikis	-2.5	2.9	3.4	-0.9		GO Biological Processes	GO:1901361	organic cyclic compound catabolic process	-3	1.4	3.3	-1.4
Reactome Gene Sets	R-MMU-69656	Cyclin A:Cdk2-associated events at S phase entry	-2.5	2.9	3.4	-0.9		GO Biological Processes	GO:0002792	negative regulation of peptide secretion	-3	1.8	3.4	-1.4
GO Biological Processes	GO:0032782	bile acid secretion	-2.5	5.1	3.9	-0.9		KEGG Pathway	mmu04320	Dorso-ventral axis formation	-3	3.2	3.9	-1.4
KEGG Pathway	mmu_M00085	Fatty acid biosynthesis, elongation, mitochondria	-2.5	5.1	3.9	-0.9		GO Biological Processes	GO:0098727	maintenance of cell number	-3	1.8	3.4	-1.4
GO Biological Processes	GO:1901858	regulation of mitochondrial DNA metabolic process	-2.5	5.1	3.9	-0.9		GO Biological Processes	GO:0090130	tissue migration	-2.9	1.6	3.3	-1.4
GO Biological Processes	GO:0006102	isocitrate metabolic process	-2.5	5.1	3.9	-0.9		GO Biological Processes	GO:0043666	regulation of phosphoprotein phosphatase activity	-2.9	2.4	3.7	-1.4
KEGG Pathway	M00085	Fatty acid biosynthesis, elongation, mitochondria	-2.5	5.1	3.9	-0.9		GO Biological Processes	GO:0018022	peptidyl-lysine methylation	-2.9	1.9	3.5	-1.4
GO Biological Processes	GO:0046655	folic acid metabolic process	-2.5	5.1	3.9	-0.9		Reactome Gene Sets	R-MMU-422356	Regulation of insulin secretion	-2.9	2.4	3.6	-1.4
GO Biological Processes	GO:1901661	quinone metabolic process	-2.5	2.6	3.3	-0.9		GO Biological Processes	GO:0031122	cytoplasmic microtubule organization	-2.9	2.4	3.6	-1.4
Reactome Gene Sets	R-MMU-1630316	Glycosaminoglycan metabolism	-2.5	1.7	3	-0.89		KEGG Pathway	mmu04070	Phosphatidylinositol signaling system	-2.9	2	3.5	-1.4
GO Biological Processes	GO:1904950	negative regulation of establishment of protein localization	-2.5	1.5	2.9	-0.89		GO Biological Processes	GO:1903051	negative regulation of proteolysis involved in cellular protein catabolic process	-2.9	2.2	3.6	-1.4
GO Biological Processes	GO:0006869	lipid transport	-2.4	1.4	2.9	-0.88		GO Biological Processes	GO:2000147	positive regulation of cell motility	-2.9	1.4	3.2	-1.4
Reactome Gene Sets	R-MMU-453279	Mitotic G1-G1/S phases	-2.4	1.9	3.1	-0.88		GO Biological Processes	GO:0097480	establishment of synaptic vesicle localization	-2.9	1.7	3.4	-1.3
GO Biological Processes	GO:0031269	pseudopodium assembly	-2.4	3.5	3.6	-0.88		GO Biological Processes	GO:0048489	synaptic vesicle transport	-2.9	1.7	3.4	-1.3
GO Biological Processes	GO:0033673	negative regulation of kinase activity	-2.4	1.5	2.9	-0.88		GO Biological Processes	GO:0034349	glial cell apoptotic process	-2.9	3.8	4	-1.3
GO Biological Processes	GO:0006085	acetyl-CoA biosynthetic process	-2.4	3.2	3.5	-0.88		GO Biological Processes	GO:0110053	regulation of actin filament organization	-2.9	1.6	3.3	-1.3
GO Biological Processes	GO:0010801	negative regulation of peptidyl-threonine phosphorylation	-2.4	3.2	3.5	-0.88		GO Biological Processes	GO:1904761	negative regulation of myofibroblast differentiation	-2.9	9.3	5	-1.3
GO Biological Processes	GO:0019432	triglyceride biosynthetic process	-2.4	2.4	3.2	-0.88		CORUM	CORUM:2831	TIF1gamma-Smad2-Smad3 complex	-2.9	9.3	5	-1.3
GO Biological Processes	GO:0034030	ribonucleoside bisphosphate biosynthetic process	-2.4	2.4	3.2	-0.88		GO Biological Processes	GO:0097694	establishment of RNA localization to telomere	-2.9	9.3	5	-1.3
GO Biological Processes	GO:2000171	negative regulation of dendrite development	-2.4	2.4	3.2	-0.88		CORUM	CORUM:5566	Isl1-Jak1-Stat3 complex	-2.9	9.3	5	-1.3
GO Biological Processes	GO:0033866	nucleoside bisphosphate biosynthetic process	-2.4	2.4	3.2	-0.88		CORUM	CORUM:1122	Smcb-Smcd-PW29 complex	-2.9	9.3	5	-1.3
GO Biological Processes	GO:0034033	purine nucleoside bisphosphate biosynthetic process	-2.4	2.4	3.2	-0.88		GO Biological Processes	GO:0009611	response to wounding	-2.9	1.4	3.2	-1.3
Reactome Gene Sets	R-MMU-72702	Ribosomal scanning and start codon recognition	-2.4	2.2	3.2	-0.87		GO Biological Processes	GO:0071481	cellular response to X-ray	-2.9	5.1	4.3	-1.3
GO Biological Processes	GO:1904064	positive regulation of cation transmembrane transport	-2.4	1.6	2.9	-0.87		GO Biological Processes	GO:1902966	positive regulation of protein localization to early endosome	-2.9	5.1	4.3	-1.3
GO Biological Processes	GO:0031647	regulation of protein stability	-2.4	1.5	2.9	-0.87		GO Biological Processes	GO:1902965	regulation of protein localization to early endosome	-2.9	5.1	4.3	-1.3
GO Biological Processes	GO:0051962	positive regulation of nervous system development	-2.4	1.3	2.8	-0.87		KEGG Pathway	mmu04210	Apoptosis	-2.9	1.8	3.4	-1.3
GO Biological Processes	GO:0097484	dendrite extension	-2.4	2.3	3.2	-0.87		Reactome Gene Sets	R-MMU-449836	Other interleukin signaling	-2.9	1.6	3.3	-1.3
KEGG Pathway	mmu04010	MAPK signaling pathway	-2.4	1.5	2.9	-0.84		GO Biological Processes	GO:0021537	telencephalon development	-2.9	1.6	3.3	-1.3
GO Biological Processes	GO:1903861	positive regulation of dendrite extension	-2.4	2.7	3.3	-0.84		GO Biological Processes	GO:0031396	regulation of protein ubiquitination	-2.9	1.7	3.3	-1.3
GO Biological Processes	GO:0006760	folic acid-containing compound metabolic process	-2.4	2.7	3.3	-0.84		GO Biological Processes	GO:0046578	regulation of Ras protein signal transduction	-2.9	1.6	3.3	-1.3
GO Biological Processes	GO:0000470	maturation of LSU-rRNA	-2.4	2.7	3.3	-0.84		GO Biological Processes	GO:2001034	positive regulation of double-strand break repair via nonhomologous end joining	-2.9	4.3	4.1	-1.3
GO Biological Processes	GO:0000154	rRNA modification	-2.4	2.7	3.3	-0.84		GO Biological Processes	GO:0006895	Golgi to endosome transport	-2.9	4.3	4.1	-1.3
Reactome Gene Sets	R-MMU-373752	Netrin-1 signaling	-2.4	2.7	3.3	-0.84		Reactome Gene Sets	R-MMU-380270	Recruitment of mitotic centrosome proteins and complexes	-2.9	2.1	3.5	-1.3
GO Biological Processes	GO:2001238	positive regulation of extrinsic apoptotic signaling pathway	-2.4	2	3.1	-0.84		Reactome Gene Sets	R-MMU-380287	Centrosome maturation	-2.9	2.1	3.5	-1.3
Reactome Gene Sets	R-MMU-6807070	PTEN Regulation	-2.4	2	3.1	-0.84		GO Biological Processes	GO:0045638	negative regulation of myeloid cell differentiation	-2.9	2	3.5	-1.3
Reactome Gene Sets	R-MMU-156580	Phase II - Conjugation of compounds	-2.4	1.8	3	-0.83		GO Biological Processes	GO:0006979	response to oxidative stress	-2.9	1.5	3.2	-1.3
GO Biological Processes	GO:2001259	positive regulation of cation channel activity	-2.4	1.9	3	-0.83		GO Biological Processes	GO:0032147	activation of protein kinase activity	-2.9	1.6	3.3	-1.3
KEGG Pathway	mmu00280	Valine, leucine and isoleucine degradation	-2.4	2.1	3.1	-0.82		Reactome Gene Sets	R-MMU-8854518	AURKA Activation by TPX2	-2.8	2.2	3.5	-1.3
GO Biological Processes	GO:0010976	positive regulation of neuron projection development	-2.4	1.4	2.8	-0.82		GO Biological Processes	GO:0007409	axonogenesis	-2.8	1.4	3.2	-1.3
GO Biological Processes	GO:0043269	regulation of ion transport	-2.3	1.3	2.7	-0.8		GO Biological Processes	GO:0007059	chromosome segregation	-2.8	1.5	3.2	-1.3
GO Biological Processes	GO:0006855	drug transmembrane transport	-2.3	1.9	3	-0.8		GO Biological Processes	GO:1902017	regulation of cilium assembly	-2.8	2.3	3.6	-1.3
GO Biological Processes	GO:0072332	intrinsic apoptotic signaling pathway by p53 class mediator	-2.3	1.9	3	-0.8		Reactome Gene Sets	R-MMU-1169410	Antiviral mechanism by IFN-stimulated genes	-2.8	2.9	3.7	-1.3
GO Biological Processes	GO:0051289	protein homotetramerization	-2.3	1.8	2.9	-0.8		GO Biological Processes	GO:0031098	stress-activated protein kinase signaling cascade	-2.8	1.5	3.2	-1.3
GO Biological Processes	GO:0006165	nucleoside diphosphate phosphorylation	-2.3	1.8	2.9	-0.8		GO Biological Processes	GO:0048568	embryonic organ development	-2.8	1.4	3.2	-1.3
GO Biological Processes	GO:0006650	glycerophospholipid metabolic process	-2.3	1.5	2.8	-0.8		GO Biological Processes	GO:0007269	neurotransmitter secretion	-2.8	1.7	3.3	-1.3
Reactome Gene Sets	R-MMU-381426	Regulation of Insulin-like Growth Factor (IGF) transport and uptake by Insulin-like Growth Factor Bi	-2.3	1.6	2.9	-0.8		Reactome Gene Sets	R-MMU-4839726	Chromatin organization	-2.8	1.7	3.3	-1.3
Reactome Gene Sets	R-MMU-1793185	Chondroitin sulfate/dermatan sulfate metabolism	-2.3	2.2	3.1	-0.79		Reactome Gene Sets	R-MMU-3247509	Chromatin modifying enzymes	-2.8	1.7	3.3	-1.3
Reactome Gene Sets	R-MMU-8956319	Nucleobase catabolism	-2.3	2.3	3.1	-0.79		GO Biological Processes	GO:0019827	stem cell population maintenance	-2.8	1.7	3.3	-1.3
GO Biological Processes	GO:0031669	cellular response to nutrient levels	-2.3	1.5	2.8	-0.79		GO Biological Processes	GO:0040008	regulation of growth	-2.8	1.3	3.1	-1.3
GO Biological Processes	GO:0010884	positive regulation of lipid storage	-2.3	2.8	3.3	-0.79		GO Biological Processes	GO:0010907	positive regulation of glucose metabolic process	-2.8	2.6	3.6	-1.3
Reactome Gene Sets	R-MMU-9609507	Protein localization	-2.3	1.9	3	-0.77		GO Biological Processes	GO:0072001	renal system development	-2.8	1.5	3.2	-1.3
GO Biological Processes	GO:0001952	regulation of cell-matrix adhesion	-2.3	1.7	2.9	-0.77		GO Biological Processes	GO:1901214	regulation of neuron death	-2.8	1.5	3.2	-1.3
GO Biological Processes	GO:0046890	regulation of lipid biosynthetic process	-2.3	1.6	2.8	-0.77		GO Biological Processes	GO:0002088	lens development in camera-type eye	-2.8	2.1	3.4	-1.3
GO Biological Processes	GO:0051348	negative regulation of transferase activity	-2.3	1.5	2.8	-0.77		GO Biological Processes	GO:0014910	regulation of smooth muscle cell migration	-2.8	2.1	3.4	-1.3
Reactome Gene Sets	R-MMU-6798695	Neutrophil degranulation	-2.3	1.3	2.7	-0.76		GO Biological Processes	GO:2000146	negative regulation of cell motility	-2.8	1.5	3.2	-1.3
Reactome Gene Sets	R-MMU-3700989	Transcriptional Regulation by TP53	-2.3	1.5	2.8	-0.76		Reactome Gene Sets	R-MMU-194138	Signaling by VEGF	-2.8	2	3.4	-1.3
GO Biological Processes	GO:0034765	regulation of ion transmembrane transport	-2.3	1.3	2.7	-0.76		GO Biological Processes	GO:0046394	carboxylic acid biosynthetic process	-2.8	1.5	3.2	-1.3
Reactome Gene Sets	R-MMU-422475	Axon guidance	-2.3	1.4	2.8	-0.76		Reactome Gene Sets	R-MMU-449147	Signaling by Interleukins	-2.8	1.5	3.2	-1.3
GO Biological Processes	GO:0019359	nicotinamide nucleotide biosynthetic process	-2.3	1.8	2.9	-0.76		GO Biological Processes	GO:0042147	retrograde transport, endosome to Golgi	-2.8	2.1	3.4	-1.3
Reactome Gene Sets	R-MMU-1855167	Synthesis of pyrophosphates in the cytosol	-2.3	3.8	3.5	-0.76		GO Biological Processes	GO:0007249	I-kappaB kinase/NF-kappaB signaling	-2.8	1.7	3.3	-1.3
GO Biological Processes	GO:0019374	galactolipid metabolic process	-2.3	3.8	3.5	-0.76		GO Biological Processes	GO:0099643	signal release from synapse	-2.8	1.7	3.3	-1.3
GO Biological Processes	GO:0009313	oligosaccharide catabolic process	-2.3	3.8	3.5	-0.76		GO Biological Processes	GO:0050709	negative regulation of protein secretion	-2.8	1.8	3.3	-1.3
GO Biological Processes	GO:0015780	nucleotide-sugar transmembrane transport	-2.3	3.8	3.5	-0.76		GO Biological Processes	GO:2000779	regulation of double-strand break repair	-2.8	2.2	3.4	-1.3
KEGG Pathway	M00010	Citrate cycle, first carbon oxidation, oxaloacetate => 2-oxoglutarate	-2.3	3.8	3.5	-0.76		GO Biological Processes	GO:0010942	positive regulation of cell death	-2.8	1.3	3.1	-1.3
GO Biological Processes	GO:0061684	chaperone-mediated autophagy	-2.3	3.8	3.5	-0.76		GO Biological Processes	GO:0060998	regulation of dendritic spine development	-2.8	2	3.4	-1.3
KEGG Pathway	mmu_M00010	Citrate cycle, first carbon oxidation, oxaloacetate => 2-oxoglutarate	-2.3	3.8	3.5	-0.76		GO Biological Processes	GO:2000015	regulation of determination of dorsal identity	-2.8	6.2	4.4	-1.3
GO Biological Processes	GO:0072321	chaperone-mediated protein transport	-2.3	3.8	3.5	-0.76		GO Biological Processes	GO:1905323	telomerase holoenzyme complex assembly	-2.8	6.2	4.4	-1.3
GO Biological Processes	GO:0030168	platelet activation	-2.3	1.8	2.9	-0.76		GO Biological Processes	GO:1904683	regulation of metalloendopeptidase activity	-2.8	6.2	4.4	-1.3
GO Biological Processes	GO:0051193	regulation of cofactor metabolic process	-2.3	1.9	2.9	-0.76		GO Biological Processes	GO:0006798	polyphosphate catabolic process	-2.8	6.2	4.4	-1.3
GO Biological Processes	GO:0070131	positive regulation of mitochondrial translation	-2.3	3	3.3	-0.76		GO Biological Processes	GO:0009912	auditory receptor cell fate commitment	-2.8	6.2	4.4	-1.3
GO Biological Processes	GO:0010544	negative regulation of platelet activation	-2.3	3	3.3	-0.76		GO Biological Processes	GO:0060120	inner ear receptor cell fate commitment	-2.8	6.2	4.4	-1.3
Reactome Gene Sets	R-MMU-8948751	Regulation of PTEN stability and activity	-2.3	3	3.3	-0.76		Reactome Gene Sets	R-MMU-9645139	Stat5 Activation	-2.8	6.2	4.4	-1.3
GO Biological Processes	GO:0030150	protein import into mitochondrial matrix	-2.3	3	3.3	-0.76		GO Biological Processes	GO:0006797	polyphosphate metabolic process	-2.8	6.2	4.4	-1.3
GO Biological Processes	GO:0000460	maturation of 5.8S rRNA	-2.3	2.6	3.1	-0.75		GO Biological Processes	GO:0061512	protein localization to cilium	-2.8	2.4	3.5	-1.3
GO Biological Processes	GO:0043268	positive regulation of potassium ion transport	-2.3	2.1	3	-0.75		Reactome Gene Sets	R-MMU-5610787	Hedgehog 'off' state	-2.8	2.4	3.5	-1.3
Reactome Gene Sets	R-MMU-72649	Translation initiation complex formation	-2.3	2.1	3	-0.75		GO Biological Processes	GO:0016053	organic acid biosynthetic process	-2.8	1.5	3.2	-1.3
GO Biological Processes	GO:0061138	morphogenesis of a branching epithelium	-2.3	1.5	2.8	-0.75		KEGG Pathway	mmu04720	Long-term potentiation	-2.8	2.2	3.5	-1.3
GO Biological Processes	GO:0006090	pyruvate metabolic process	-2.3	1.7	2.8	-0.74		GO Biological Processes	GO:2000463	positive regulation of excitatory postsynaptic potential	-2.8	2.7	3.6	-1.3
GO Biological Processes	GO:2001236	regulation of extrinsic apoptotic signaling pathway	-2.2	1.6	2.8	-0.74		GO Biological Processes	GO:0031398	positive regulation of protein ubiquitination	-2.8	1.9	3.3	-1.2
GO Biological Processes	GO:0030308	negative regulation of cell growth	-2.2	1.5	2.8	-0.74		GO Biological Processes	GO:0007044	cell-substrate junction assembly	-2.7	2	3.4	-1.2
GO Biological Processes	GO:0099550	trans-synaptic signaling, modulating synaptic transmission	-2.2	3.3	3.3	-0.74		GO Biological Processes	GO:0006892	post-Golgi vesicle-mediated transport	-2.7	2	3.3	-1.2
GO Biological Processes	GO:0043087	regulation of GTPase activity	-2.2	1.4	2.7	-0.73		GO Biological Processes	GO:1901988	negative regulation of cell cycle phase transition	-2.7	1.7	3.3	-1.2
GO Biological Processes	GO:0006814	sodium ion transport	-2.2	1.5	2.7	-0.73		GO Biological Processes	GO:0043433	negative regulation of DNA-binding transcription factor activity	-2.7	1.7	3.3	-1.2
GO Biological Processes	GO:1901264	carbohydrate derivative transport	-2.2	2	2.9	-0.73		GO Biological Processes	GO:1904262	negative regulation of TORC1 signaling	-2.7	3.6	3.8	-1.2
GO Biological Processes	GO:0006084	acetyl-CoA metabolic process	-2.2	2.4	3.1	-0.73		GO Biological Processes	GO:0072578	neurotransmitter-gated ion channel clustering	-2.7	3.6	3.8	-1.2
KEGG Pathway	mmu00052	Galactose metabolism	-2.2	2.4	3.1	-0.73		GO Biological Processes	GO:0035278	miRNA mediated inhibition of translation	-2.7	3.6	3.8	-1.2
GO Biological Processes	GO:0051180	vitamin transport	-2.2	2.4	3.1	-0.73		GO Biological Processes	GO:0072148	epithelial cell fate commitment	-2.7	3.6	3.8	-1.2
GO Biological Processes	GO:0010543	regulation of platelet activation	-2.2	2.4	3.1	-0.73		GO Biological Processes	GO:0006401	RNA catabolic process	-2.7	1.6	3.2	-1.2
Reactome Gene Sets	R-MMU-425397	Transport of vitamins, nucleosides, and related molecules	-2.2	2.2	3	-0.73		GO Biological Processes	GO:0034142	toll-like receptor 4 signaling pathway	-2.7	2.8	3.6	-1.2
GO Biological Processes	GO:2001235	positive regulation of apoptotic signaling pathway	-2.2	1.5	2.8	-0.73		Reactome Gene Sets	R-MMU-177929	Signaling by EGFR	-2.7	2.5	3.5	-1.2
GO Biological Processes	GO:0007435	salivary gland morphogenesis	-2.2	2.3	3	-0.73		Reactome Gene Sets	R-MMU-9607240	FLT3 Signaling	-2.7	1.6	3.2	-1.2
Reactome Gene Sets	R-MMU-3928662	EPHB-mediated forward signaling	-2.2	2.3	3	-0.73		GO Biological Processes	GO:0002009	morphogenesis of an epithelium	-2.7	1.4	3.1	-1.2
GO Biological Processes	GO:0046942	carboxylic acid transport	-2.2	1.4	2.7	-0.73		GO Biological Processes	GO:0043254	regulation of protein complex assembly	-2.7	1.4	3.1	-1.2
GO Biological Processes	GO:0046939	nucleotide phosphorylation	-2.2	1.7	2.8	-0.72		GO Biological Processes	GO:0010038	response to metal ion	-2.7	1.5	3.2	-1.2
GO Biological Processes	GO:0060828	regulation of canonical Wnt signaling pathway	-2.2	1.5	2.7	-0.72		GO Biological Processes	GO:0046928	regulation of neurotransmitter secretion	-2.7	1.8	3.3	-1.2
GO Biological Processes	GO:0030203	glycosaminoglycan metabolic process	-2.2	1.8	2.9	-0.72		GO Biological Processes	GO:0007389	pattern specification process	-2.7	1.4	3.1	-1.2
GO Biological Processes	GO:0072525	pyridine-containing compound biosynthetic process	-2.2	1.7	2.8	-0.71		Reactome Gene Sets	R-MMU-75153	Apoptotic execution phase	-2.7	2.4	3.5	-1.2
Reactome Gene Sets	R-MMU-166520	Signaling by NTRKs	-2.2	1.9	2.9	-0.71		GO Biological Processes	GO:0060612	adipose tissue development	-2.7	2.4	3.5	-1.2
Reactome Gene Sets	R-MMU-202733	Cell surface interactions at the vascular wall	-2.2	1.7	2.8	-0.7		GO Biological Processes	GO:0051589	negative regulation of neurotransmitter transport	-2.7	3	3.6	-1.2
GO Biological Processes	GO:0015849	organic acid transport	-2.2	1.4	2.7	-0.7		Reactome Gene Sets	R-MMU-1169408	ISG15 antiviral mechanism	-2.7	3	3.6	-1.2
GO Biological Processes	GO:0071870	cellular response to catecholamine stimulus	-2.2	2.7	3.1	-0.7		GO Biological Processes	GO:0045724	positive regulation of cilium assembly	-2.7	3	3.6	-1.2
GO Biological Processes	GO:0019320	hexose catabolic process	-2.2	2.7	3.1	-0.7		GO Biological Processes	GO:0008643	carbohydrate transport	-2.7	1.8	3.2	-1.2
Reactome Gene Sets	R-MMU-70895	Branched-chain amino acid catabolism	-2.2	2.7	3.1	-0.7		KEGG Pathway	mmu04360	Axon guidance	-2.7	1.7	3.2	-1.2
GO Biological Processes	GO:0010038	response to metal ion	-2.2	1.4	2.7	-0.69		GO Biological Processes	GO:1903306	negative regulation of regulated secretory pathway	-2.7	3.2	3.7	-1.2
Reactome Gene Sets	R-MMU-72662	Activation of the mRNA upon binding of the cap-binding complex and eIFs, and subsequent binding to 4	-2.2	2	2.9	-0.69		GO Biological Processes	GO:0050765	negative regulation of phagocytosis	-2.7	3.2	3.7	-1.2
Reactome Gene Sets	R-MMU-193648	NRAGE signals death through JNK	-2.2	2	2.9	-0.69		GO Biological Processes	GO:0014911	positive regulation of smooth muscle cell migration	-2.7	2.2	3.4	-1.2
GO Biological Processes	GO:0051224	negative regulation of protein transport	-2.2	1.5	2.7	-0.68		Reactome Gene Sets	R-MMU-6807070	PTEN Regulation	-2.7	2.2	3.4	-1.2
GO Biological Processes	GO:0032102	negative regulation of response to external stimulus	-2.2	1.4	2.6	-0.68		KEGG Pathway	mmu04658	Th1 and Th2 cell differentiation	-2.7	2	3.3	-1.2
GO Biological Processes	GO:0051259	protein complex oligomerization	-2.2	1.3	2.6	-0.68		GO Biological Processes	GO:0071496	cellular response to external stimulus	-2.7	1.5	3.1	-1.2
Reactome Gene Sets	R-MMU-76002	Platelet activation, signaling and aggregation	-2.2	1.4	2.7	-0.68		GO Biological Processes	GO:1902275	regulation of chromatin organization	-2.7	1.6	3.2	-1.2
GO Biological Processes	GO:0006399	tRNA metabolic process	-2.2	1.5	2.7	-0.68		GO Biological Processes	GO:0030855	epithelial cell differentiation	-2.7	1.3	3	-1.2
Reactome Gene Sets	R-MMU-1483249	Inositol phosphate metabolism	-2.2	2.1	2.9	-0.67		GO Biological Processes	GO:0048193	Golgi vesicle transport	-2.7	1.5	3.1	-1.2
GO Biological Processes	GO:0050769	positive regulation of neurogenesis	-2.2	1.3	2.6	-0.67		Reactome Gene Sets	R-MMU-1257604	PIP3 activates AKT signaling	-2.7	1.7	3.2	-1.2
GO Biological Processes	GO:0008360	regulation of cell shape	-2.1	1.6	2.7	-0.67		GO Biological Processes	GO:0099151	regulation of postsynaptic density assembly	-2.7	4	3.9	-1.2
GO Biological Processes	GO:0071901	negative regulation of protein serine/threonine kinase activity	-2.1	1.7	2.7	-0.67		GO Biological Processes	GO:0031937	positive regulation of chromatin silencing	-2.7	4	3.9	-1.2
GO Biological Processes	GO:0008637	apoptotic mitochondrial changes	-2.1	1.7	2.7	-0.67		GO Biological Processes	GO:0042921	glucocorticoid receptor signaling pathway	-2.7	4	3.9	-1.2
GO Biological Processes	GO:0044003	modification by symbiont of host morphology or physiology	-2.1	2.5	3	-0.67		GO Biological Processes	GO:0010225	response to UV-C	-2.7	4	3.9	-1.2
GO Biological Processes	GO:0043457	regulation of cellular respiration	-2.1	2.5	3	-0.67		GO Biological Processes	GO:0035970	peptidyl-threonine dephosphorylation	-2.7	4	3.9	-1.2
GO Biological Processes	GO:0097345	mitochondrial outer membrane permeabilization	-2.1	2.5	3	-0.67		KEGG Pathway	mmu04910	Insulin signaling pathway	-2.7	1.8	3.2	-1.2
KEGG Pathway	mmu01040	Biosynthesis of unsaturated fatty acids	-2.1	2.5	3	-0.67		GO Biological Processes	GO:1902882	regulation of response to oxidative stress	-2.7	2	3.3	-1.2
KEGG Pathway	mmu03010	Ribosome	-2.1	1.5	2.7	-0.67		Reactome Gene Sets	R-MMU-5653656	Vesicle-mediated transport	-2.7	1.4	3	-1.2
GO Biological Processes	GO:0006566	threonine metabolic process	-2.1	4.4	3.5	-0.67		GO Biological Processes	GO:0051271	negative regulation of cellular component movement	-2.6	1.5	3.1	-1.2
GO Biological Processes	GO:0006678	glucosylceramide metabolic process	-2.1	4.4	3.5	-0.67		GO Biological Processes	GO:0006813	potassium ion transport	-2.6	1.6	3.1	-1.2
GO Biological Processes	GO:0046477	glycosylceramide catabolic process	-2.1	4.4	3.5	-0.67		GO Biological Processes	GO:0070997	neuron death	-2.6	1.4	3.1	-1.2
GO Biological Processes	GO:0050655	dermatan sulfate proteoglycan metabolic process	-2.1	4.4	3.5	-0.67		GO Biological Processes	GO:1900371	regulation of purine nucleotide biosynthetic process	-2.6	2.1	3.3	-1.2
Reactome Gene Sets	R-MMU-1482883	Acyl chain remodeling of DAG and TAG	-2.1	4.4	3.5	-0.67		GO Biological Processes	GO:0070373	negative regulation of ERK1 and ERK2 cascade	-2.6	2.1	3.3	-1.2
GO Biological Processes	GO:1901029	negative regulation of mitochondrial outer membrane permeabilization involved in apoptotic signaling	-2.1	4.4	3.5	-0.67		GO Biological Processes	GO:0030808	regulation of nucleotide biosynthetic process	-2.6	2.1	3.3	-1.2
GO Biological Processes	GO:0019388	galactose catabolic process	-2.1	4.4	3.5	-0.67		Reactome Gene Sets	R-MMU-73614	Pyrimidine salvage	-2.6	4.6	4	-1.2
GO Biological Processes	GO:0072330	monocarboxylic acid biosynthetic process	-2.1	1.4	2.6	-0.67		GO Biological Processes	GO:0002315	marginal zone B cell differentiation	-2.6	4.6	4	-1.2
GO Biological Processes	GO:0006766	vitamin metabolic process	-2.1	1.9	2.8	-0.67		GO Biological Processes	GO:0070857	regulation of bile acid biosynthetic process	-2.6	4.6	4	-1.2
GO Biological Processes	GO:0010631	epithelial cell migration	-2.1	1.4	2.6	-0.67		Reactome Gene Sets	R-MMU-399955	SEMA3A-Plexin repulsion signaling by inhibiting Integrin adhesion	-2.6	4.6	4	-1.2
KEGG Pathway	mmu00561	Glycerolipid metabolism	-2.1	2	2.8	-0.67		GO Biological Processes	GO:0045176	apical protein localization	-2.6	4.6	4	-1.2
GO Biological Processes	GO:1903510	mucopolysaccharide metabolic process	-2.1	2	2.8	-0.67		Reactome Gene Sets	R-MMU-2122948	Activated NOTCH1 Transmits Signal to the Nucleus	-2.6	4.6	4	-1.2
GO Biological Processes	GO:0006487	protein N-linked glycosylation	-2.1	2	2.8	-0.67		GO Biological Processes	GO:0035196	production of miRNAs involved in gene silencing by miRNA	-2.6	2.5	3.4	-1.2
GO Biological Processes	GO:0021680	cerebellar Purkinje cell layer development	-2.1	2.3	3	-0.67		GO Biological Processes	GO:0048678	response to axon injury	-2.6	2.1	3.3	-1.2
GO Biological Processes	GO:0006220	pyrimidine nucleotide metabolic process	-2.1	2.3	3	-0.67		GO Biological Processes	GO:0050885	neuromuscular process controlling balance	-2.6	2.1	3.3	-1.2
GO Biological Processes	GO:0090218	positive regulation of lipid kinase activity	-2.1	2.3	3	-0.67		GO Biological Processes	GO:0040013	negative regulation of locomotion	-2.6	1.5	3.1	-1.2
GO Biological Processes	GO:0042558	pteridine-containing compound metabolic process	-2.1	2.3	3	-0.67		GO Biological Processes	GO:0048871	multicellular organismal homeostasis	-2.6	1.4	3	-1.2
GO Biological Processes	GO:1902686	mitochondrial outer membrane permeabilization involved in programmed cell death	-2.1	2.3	3	-0.67		GO Biological Processes	GO:0099068	postsynapse assembly	-2.6	2.7	3.5	-1.2
GO Biological Processes	GO:1905710	positive regulation of membrane permeability	-2.1	2.2	2.9	-0.67		Reactome Gene Sets	R-MMU-2173793	Transcriptional activity of SMAD2/SMAD3:SMAD4 heterotrimer	-2.6	2.7	3.5	-1.2
KEGG Pathway	mmu00620	Pyruvate metabolism	-2.1	2.2	2.9	-0.67		GO Biological Processes	GO:0043618	regulation of transcription from RNA polymerase II promoter in response to stress	-2.6	2.4	3.4	-1.2
GO Biological Processes	GO:0000027	ribosomal large subunit assembly	-2.1	2.2	2.9	-0.67		GO Biological Processes	GO:0048729	tissue morphogenesis	-2.6	1.3	3	-1.2
GO Biological Processes	GO:1990138	neuron projection extension	-2.1	1.5	2.7	-0.66		Reactome Gene Sets	R-MMU-199991	Membrane Trafficking	-2.6	1.4	3	-1.2
GO Biological Processes	GO:0010766	negative regulation of sodium ion transport	-2.1	2.8	3.1	-0.66		GO Biological Processes	GO:0007528	neuromuscular junction development	-2.6	2.3	3.4	-1.2
GO Biological Processes	GO:1901028	regulation of mitochondrial outer membrane permeabilization involved in apoptotic signaling pathway	-2.1	2.8	3.1	-0.66		GO Biological Processes	GO:1900006	positive regulation of dendrite development	-2.6	1.9	3.2	-1.2
GO Biological Processes	GO:0016137	glycoside metabolic process	-2.1	2.8	3.1	-0.66		Reactome Gene Sets	R-MMU-1640170	Cell Cycle	-2.6	1.4	3	-1.1
GO Biological Processes	GO:0090502	RNA phosphodiester bond hydrolysis, endonucleolytic	-2.1	2.8	3.1	-0.66		GO Biological Processes	GO:0033044	regulation of chromosome organization	-2.6	1.5	3	-1.1
Reactome Gene Sets	R-MMU-3928663	EPHA-mediated growth cone collapse	-2.1	2.8	3.1	-0.66		Reactome Gene Sets	R-MMU-1168372	Downstream signaling events of B Cell Receptor (BCR)	-2.6	2.9	3.5	-1.1
Reactome Gene Sets	R-MMU-69615	G1/S DNA Damage Checkpoints	-2.1	2.8	3.1	-0.66		GO Biological Processes	GO:0010586	miRNA metabolic process	-2.6	2.9	3.5	-1.1
GO Biological Processes	GO:0019363	pyridine nucleotide biosynthetic process	-2.1	1.7	2.7	-0.66		GO Biological Processes	GO:1904029	regulation of cyclin-dependent protein kinase activity	-2.6	2.1	3.3	-1.1
GO Biological Processes	GO:0043406	positive regulation of MAP kinase activity	-2.1	1.5	2.6	-0.66		GO Biological Processes	GO:0008088	axo-dendritic transport	-2.6	2.1	3.3	-1.1
KEGG Pathway	mmu04072	Phospholipase D signaling pathway	-2.1	1.6	2.7	-0.66		Reactome Gene Sets	R-MMU-1980143	Signaling by NOTCH1	-2.6	3.4	3.7	-1.1
GO Biological Processes	GO:0022612	gland morphogenesis	-2.1	1.6	2.7	-0.66		GO Biological Processes	GO:0045974	regulation of translation, ncRNA-mediated	-2.6	3.4	3.7	-1.1
GO Biological Processes	GO:0070085	glycosylation	-2.1	1.5	2.6	-0.66		GO Biological Processes	GO:0040033	negative regulation of translation, ncRNA-mediated	-2.6	3.4	3.7	-1.1
GO Biological Processes	GO:0071902	positive regulation of protein serine/threonine kinase activity	-2.1	1.4	2.6	-0.66		GO Biological Processes	GO:0021535	cell migration in hindbrain	-2.6	3.4	3.7	-1.1
GO Biological Processes	GO:0032990	cell part morphogenesis	-2.1	1.2	2.5	-0.66		GO Biological Processes	GO:0031532	actin cytoskeleton reorganization	-2.6	1.9	3.2	-1.1
GO Biological Processes	GO:1901908	diadenosine hexaphosphate metabolic process	-2.1	5.8	3.7	-0.66		GO Biological Processes	GO:0098534	centriole assembly	-2.6	2.5	3.4	-1.1
GO Biological Processes	GO:1905881	positive regulation of oogenesis	-2.1	5.8	3.7	-0.66		GO Biological Processes	GO:0038179	neurotrophin signaling pathway	-2.6	2.5	3.4	-1.1
GO Biological Processes	GO:1901909	diadenosine hexaphosphate catabolic process	-2.1	5.8	3.7	-0.66		Reactome Gene Sets	R-MMU-421270	Cell-cell junction organization	-2.6	2.5	3.4	-1.1
GO Biological Processes	GO:1990086	lens fiber cell apoptotic process	-2.1	5.8	3.7	-0.66		Reactome Gene Sets	R-MMU-157118	Signaling by NOTCH	-2.6	2.5	3.4	-1.1
CORUM	CORUM:6879	Dystrophin-glycoprotein complex (DGC)	-2.1	5.8	3.7	-0.66		GO Biological Processes	GO:0017158	regulation of calcium ion-dependent exocytosis	-2.6	1.8	3.1	-1.1
GO Biological Processes	GO:0071543	diphosphoinositol polyphosphate metabolic process	-2.1	5.8	3.7	-0.66		GO Biological Processes	GO:1901991	negative regulation of mitotic cell cycle phase transition	-2.6	1.7	3.1	-1.1
Reactome Gene Sets	R-MMU-8853383	Lysosomal oligosaccharide catabolism	-2.1	5.8	3.7	-0.66		GO Biological Processes	GO:0007064	mitotic sister chromatid cohesion	-2.6	3.1	3.6	-1.1
GO Biological Processes	GO:0006121	mitochondrial electron transport, succinate to ubiquinone	-2.1	5.8	3.7	-0.66		GO Biological Processes	GO:0032388	positive regulation of intracellular transport	-2.6	1.6	3.1	-1.1
KEGG Pathway	M00015	Proline biosynthesis, glutamate => proline	-2.1	5.8	3.7	-0.66		GO Biological Processes	GO:0017157	regulation of exocytosis	-2.6	1.6	3	-1.1
GO Biological Processes	GO:1901910	adenosine 5'-(hexahydrogen pentaphosphate) metabolic process	-2.1	5.8	3.7	-0.66		GO Biological Processes	GO:0198738	cell-cell signaling by wnt	-2.6	1.4	3	-1.1
GO Biological Processes	GO:0043985	histone H4-R3 methylation	-2.1	5.8	3.7	-0.66		GO Biological Processes	GO:0051259	protein complex oligomerization	-2.5	1.3	2.9	-1.1
GO Biological Processes	GO:1901906	diadenosine pentaphosphate metabolic process	-2.1	5.8	3.7	-0.66		GO Biological Processes	GO:0010676	positive regulation of cellular carbohydrate metabolic process	-2.5	2.2	3.3	-1.1
GO Biological Processes	GO:1903553	positive regulation of extracellular exosome assembly	-2.1	5.8	3.7	-0.66		Reactome Gene Sets	R-MMU-1500931	Cell-Cell communication	-2.5	2	3.2	-1.1
GO Biological Processes	GO:0072093	metanephric renal vesicle formation	-2.1	5.8	3.7	-0.66		Reactome Gene Sets	R-MMU-68886	M Phase	-2.5	1.5	3	-1.1
GO Biological Processes	GO:0003104	positive regulation of glomerular filtration	-2.1	5.8	3.7	-0.66		GO Biological Processes	GO:0001822	kidney development	-2.5	1.5	3	-1.1
GO Biological Processes	GO:0060282	positive regulation of oocyte development	-2.1	5.8	3.7	-0.66		GO Biological Processes	GO:0043523	regulation of neuron apoptotic process	-2.5	1.5	3	-1.1
GO Biological Processes	GO:1901907	diadenosine pentaphosphate catabolic process	-2.1	5.8	3.7	-0.66		GO Biological Processes	GO:0098930	axonal transport	-2.5	2.2	3.3	-1.1
GO Biological Processes	GO:1900738	positive regulation of phospholipase C-activating G protein-coupled receptor signaling pathway	-2.1	5.8	3.7	-0.66		KEGG Pathway	mmu05223	Non-small cell lung cancer	-2.5	2.2	3.3	-1.1
GO Biological Processes	GO:0090155	negative regulation of sphingolipid biosynthetic process	-2.1	5.8	3.7	-0.66		GO Biological Processes	GO:0051090	regulation of DNA-binding transcription factor activity	-2.5	1.4	3	-1.1
GO Biological Processes	GO:0006561	proline biosynthetic process	-2.1	5.8	3.7	-0.66		GO Biological Processes	GO:0048593	camera-type eye morphogenesis	-2.5	1.8	3.1	-1.1
Reactome Gene Sets	R-MMU-140179	Amine Oxidase reactions	-2.1	5.8	3.7	-0.66		GO Biological Processes	GO:1903707	negative regulation of hemopoiesis	-2.5	1.7	3.1	-1.1
GO Biological Processes	GO:0032286	central nervous system myelin maintenance	-2.1	5.8	3.7	-0.66		GO Biological Processes	GO:0070371	ERK1 and ERK2 cascade	-2.5	1.5	3	-1.1
GO Biological Processes	GO:1901911	adenosine 5'-(hexahydrogen pentaphosphate) catabolic process	-2.1	5.8	3.7	-0.66		GO Biological Processes	GO:0006165	nucleoside diphosphate phosphorylation	-2.5	1.9	3.1	-1.1
GO Biological Processes	GO:0070125	mitochondrial translational elongation	-2.1	5.8	3.7	-0.66		GO Biological Processes	GO:0032231	regulation of actin filament bundle assembly	-2.5	1.9	3.1	-1.1
KEGG Pathway	mmu_M00015	Proline biosynthesis, glutamate => proline	-2.1	5.8	3.7	-0.66		GO Biological Processes	GO:0032088	negative regulation of NF-kappaB transcription factor activity	-2.5	2	3.2	-1.1
GO Biological Processes	GO:0045860	positive regulation of protein kinase activity	-2.1	1.3	2.6	-0.66		Reactome Gene Sets	R-MMU-375165	NCAM signaling for neurite out-growth	-2.5	2.6	3.4	-1.1
GO Biological Processes	GO:0042274	ribosomal small subunit biogenesis	-2.1	1.9	2.8	-0.66		Reactome Gene Sets	R-MMU-4420097	VEGFA-VEGFR2 Pathway	-2.5	2	3.2	-1.1
GO Biological Processes	GO:0045727	positive regulation of translation	-2.1	1.6	2.7	-0.66		GO Biological Processes	GO:0045833	negative regulation of lipid metabolic process	-2.5	2	3.2	-1.1
Reactome Gene Sets	R-MMU-3371556	Cellular response to heat stress	-2.1	1.8	2.7	-0.66		GO Biological Processes	GO:0006096	glycolytic process	-2.5	2	3.2	-1.1
GO Biological Processes	GO:0034764	positive regulation of transmembrane transport	-2.1	1.4	2.6	-0.65		GO Biological Processes	GO:0060541	respiratory system development	-2.5	1.5	3	-1.1
GO Biological Processes	GO:0022411	cellular component disassembly	-2.1	1.3	2.6	-0.65		GO Biological Processes	GO:0016032	viral process	-2.5	1.5	3	-1.1
KEGG Pathway	mmu00520	Amino sugar and nucleotide sugar metabolism	-2.1	2	2.8	-0.65		GO Biological Processes	GO:0010675	regulation of cellular carbohydrate metabolic process	-2.5	1.7	3	-1.1
GO Biological Processes	GO:0043550	regulation of lipid kinase activity	-2.1	2	2.8	-0.65		GO Biological Processes	GO:0016571	histone methylation	-2.5	1.7	3.1	-1.1
GO Biological Processes	GO:0090132	epithelium migration	-2.1	1.4	2.6	-0.65		GO Biological Processes	GO:0007050	cell cycle arrest	-2.5	1.7	3.1	-1.1
GO Biological Processes	GO:0009083	branched-chain amino acid catabolic process	-2.1	3.1	3.1	-0.65		GO Biological Processes	GO:0060396	growth hormone receptor signaling pathway	-2.5	3.7	3.6	-1.1
GO Biological Processes	GO:0009312	oligosaccharide biosynthetic process	-2.1	3.1	3.1	-0.65		GO Biological Processes	GO:0031958	corticosteroid receptor signaling pathway	-2.5	3.7	3.6	-1.1
GO Biological Processes	GO:0046033	AMP metabolic process	-2.1	3.1	3.1	-0.65		GO Biological Processes	GO:0000722	telomere maintenance via recombination	-2.5	3.7	3.6	-1.1
KEGG Pathway	mmu00604	Glycosphingolipid biosynthesis - ganglio series	-2.1	3.1	3.1	-0.65		Reactome Gene Sets	R-MMU-2243919	Crosslinking of collagen fibrils	-2.5	3.7	3.6	-1.1
GO Biological Processes	GO:0031268	pseudopodium organization	-2.1	3.1	3.1	-0.65		GO Biological Processes	GO:0071378	cellular response to growth hormone stimulus	-2.5	3.7	3.6	-1.1
GO Biological Processes	GO:0034698	response to gonadotropin	-2.1	3.1	3.1	-0.65		GO Biological Processes	GO:0002832	negative regulation of response to biotic stimulus	-2.5	2.5	3.3	-1.1
Reactome Gene Sets	R-MMU-8956320	Nucleobase biosynthesis	-2.1	3.1	3.1	-0.65		GO Biological Processes	GO:0045494	photoreceptor cell maintenance	-2.5	2.5	3.3	-1.1
GO Biological Processes	GO:2000811	negative regulation of anoikis	-2.1	3.1	3.1	-0.65		GO Biological Processes	GO:1902905	positive regulation of supramolecular fiber organization	-2.5	1.6	3	-1.1
GO Biological Processes	GO:1900451	positive regulation of glutamate receptor signaling pathway	-2.1	3.1	3.1	-0.65		Reactome Gene Sets	R-MMU-446728	Cell junction organization	-2.5	2.1	3.2	-1.1
GO Biological Processes	GO:0010878	cholesterol storage	-2.1	3.1	3.1	-0.65		GO Biological Processes	GO:0050804	modulation of chemical synaptic transmission	-2.5	1.3	2.9	-1.1
GO Biological Processes	GO:1903725	regulation of phospholipid metabolic process	-2.1	1.8	2.7	-0.65		GO Biological Processes	GO:0051983	regulation of chromosome segregation	-2.5	1.9	3.1	-1
Reactome Gene Sets	R-MMU-168179	Toll Like Receptor TLR1:TLR2 Cascade	-2.1	1.8	2.7	-0.65		GO Biological Processes	GO:0048598	embryonic morphogenesis	-2.5	1.3	2.9	-1
Reactome Gene Sets	R-MMU-166058	MyD88:MAL(TIRAP) cascade initiated on plasma membrane	-2.1	1.8	2.7	-0.65		GO Biological Processes	GO:0035640	exploration behavior	-2.5	2.8	3.4	-1
Reactome Gene Sets	R-MMU-168188	Toll Like Receptor TLR6:TLR2 Cascade	-2.1	1.8	2.7	-0.65		GO Biological Processes	GO:0070936	protein K48-linked ubiquitination	-2.5	2.2	3.2	-1
Reactome Gene Sets	R-MMU-181438	Toll Like Receptor 2 (TLR2) Cascade	-2.1	1.8	2.7	-0.65		GO Biological Processes	GO:0070918	production of small RNA involved in gene silencing by RNA	-2.5	2.4	3.3	-1
GO Biological Processes	GO:0007416	synapse assembly	-2.1	1.5	2.6	-0.65		GO Biological Processes	GO:0031050	dsRNA processing	-2.5	2.4	3.3	-1
GO Biological Processes	GO:0045666	positive regulation of neuron differentiation	-2.1	1.3	2.5	-0.65		GO Biological Processes	GO:1901799	negative regulation of proteasomal protein catabolic process	-2.5	2.3	3.2	-1
GO Biological Processes	GO:0010817	regulation of hormone levels	-2.1	1.3	2.5	-0.65		Reactome Gene Sets	R-MMU-983705	Signaling by the B Cell Receptor (BCR)	-2.5	2.3	3.2	-1
GO Biological Processes	GO:0019048	modulation by virus of host morphology or physiology	-2.1	2.6	3	-0.65		GO Biological Processes	GO:0019079	viral genome replication	-2.5	1.8	3.1	-1
GO Biological Processes	GO:0071868	cellular response to monoamine stimulus	-2.1	2.6	3	-0.65		GO Biological Processes	GO:0099177	regulation of trans-synaptic signaling	-2.5	1.3	2.9	-1
GO Biological Processes	GO:0009065	glutamine family amino acid catabolic process	-2.1	2.6	3	-0.65		GO Biological Processes	GO:0046683	response to organophosphorus	-2.5	1.9	3.1	-1
GO Biological Processes	GO:0071869	response to catecholamine	-2.1	2.6	3	-0.65		GO Biological Processes	GO:0006757	ATP generation from ADP	-2.5	1.9	3.1	-1
GO Biological Processes	GO:1902231	positive regulation of intrinsic apoptotic signaling pathway in response to DNA damage	-2.1	3.5	3.2	-0.65		GO Biological Processes	GO:0001938	positive regulation of endothelial cell proliferation	-2.5	1.9	3.1	-1
KEGG Pathway	M00032	Lysine degradation, lysine => saccharopine => acetoacetyl-CoA	-2.1	3.5	3.2	-0.65		GO Biological Processes	GO:0046785	microtubule polymerization	-2.5	2	3.1	-1
KEGG Pathway	mmu_M00034	Methionine salvage pathway	-2.1	3.5	3.2	-0.65		GO Biological Processes	GO:0010632	regulation of epithelial cell migration	-2.5	1.6	3	-1
KEGG Pathway	mmu00130	Ubiquinone and other terpenoid-quinone biosynthesis	-2.1	3.5	3.2	-0.65		Reactome Gene Sets	R-MMU-983169	Class I MHC mediated antigen processing & presentation	-2.5	1.5	2.9	-1
KEGG Pathway	mmu_M00032	Lysine degradation, lysine => saccharopine => acetoacetyl-CoA	-2.1	3.5	3.2	-0.65		GO Biological Processes	GO:0007179	transforming growth factor beta receptor signaling pathway	-2.4	1.7	3	-1
KEGG Pathway	M00034	Methionine salvage pathway	-2.1	3.5	3.2	-0.65		GO Biological Processes	GO:0009615	response to virus	-2.4	1.5	2.9	-1
GO Biological Processes	GO:0043039	tRNA aminoacylation	-2.1	2.1	2.8	-0.64		GO Biological Processes	GO:0050727	regulation of inflammatory response	-2.4	1.4	2.9	-1
GO Biological Processes	GO:0046474	glycerophospholipid biosynthetic process	-2.1	1.7	2.7	-0.64		GO Biological Processes	GO:0035865	cellular response to potassium ion	-2.4	5.3	4	-1
GO Biological Processes	GO:0071277	cellular response to calcium ion	-2	1.8	2.7	-0.64		GO Biological Processes	GO:0106104	regulation of glutamate receptor clustering	-2.4	5.3	4	-1
GO Biological Processes	GO:0032984	protein-containing complex disassembly	-2	1.5	2.6	-0.64		GO Biological Processes	GO:0035864	response to potassium ion	-2.4	5.3	4	-1
GO Biological Processes	GO:0001763	morphogenesis of a branching structure	-2	1.4	2.6	-0.64		GO Biological Processes	GO:1904717	regulation of AMPA glutamate receptor clustering	-2.4	5.3	4	-1
GO Biological Processes	GO:0048588	developmental cell growth	-2	1.4	2.6	-0.64		GO Biological Processes	GO:0042297	vocal learning	-2.4	5.3	4	-1
KEGG Pathway	mmu00350	Tyrosine metabolism	-2	2.2	2.8	-0.63		GO Biological Processes	GO:0098596	imitative learning	-2.4	5.3	4	-1
GO Biological Processes	GO:0061082	myeloid leukocyte cytokine production	-2	2.4	2.9	-0.63		GO Biological Processes	GO:0051053	negative regulation of DNA metabolic process	-2.4	1.7	3	-1
KEGG Pathway	mmu00630	Glyoxylate and dicarboxylate metabolism	-2	2.4	2.9	-0.63		KEGG Pathway	mmu04921	Oxytocin signaling pathway	-2.4	1.7	3	-1
GO Biological Processes	GO:0010977	negative regulation of neuron projection development	-2	1.5	2.6	-0.61		Reactome Gene Sets	R-MMU-5693554	Resolution of D-loop Structures through Synthesis-Dependent Strand Annealing (SDSA)	-2.4	3	3.4	-1
Reactome Gene Sets	R-MMU-425407	SLC-mediated transmembrane transport	-2	1.4	2.5	-0.61		GO Biological Processes	GO:0000289	nuclear-transcribed mRNA poly(A) tail shortening	-2.4	3	3.4	-1
GO Biological Processes	GO:0090130	tissue migration	-2	1.4	2.5	-0.61		GO Biological Processes	GO:1904030	negative regulation of cyclin-dependent protein kinase activity	-2.4	3	3.4	-1
GO Biological Processes	GO:0050920	regulation of chemotaxis	-2	1.4	2.5	-0.61		GO Biological Processes	GO:0030728	ovulation	-2.4	3	3.4	-1
GO Biological Processes	GO:0099565	chemical synaptic transmission, postsynaptic	-2	1.7	2.6	-0.61		GO Biological Processes	GO:0051443	positive regulation of ubiquitin-protein transferase activity	-2.4	3	3.4	-1
GO Biological Processes	GO:0034250	positive regulation of cellular amide metabolic process	-2	1.6	2.6	-0.61		GO Biological Processes	GO:0032495	response to muramyl dipeptide	-2.4	3.2	3.5	-1
GO Biological Processes	GO:0010507	negative regulation of autophagy	-2	1.8	2.7	-0.61		GO Biological Processes	GO:0045821	positive regulation of glycolytic process	-2.4	3.2	3.5	-1
GO Biological Processes	GO:0035725	sodium ion transmembrane transport	-2	1.7	2.6	-0.6		GO Biological Processes	GO:0070828	heterochromatin organization	-2.4	3.2	3.5	-1
GO Biological Processes	GO:0050773	regulation of dendrite development	-2	1.5	2.5	-0.6		GO Biological Processes	GO:0048638	regulation of developmental growth	-2.4	1.4	2.9	-1
GO Biological Processes	GO:0051196	regulation of coenzyme metabolic process	-2	2	2.7	-0.6		GO Biological Processes	GO:0000079	regulation of cyclin-dependent protein serine/threonine kinase activity	-2.4	2.1	3.1	-1
								GO Biological Processes	GO:0097755	positive regulation of blood vessel diameter	-2.4	2.1	3.1	-1
								GO Biological Processes	GO:0071559	response to transforming growth factor beta	-2.4	1.6	2.9	-1
								KEGG Pathway	mmu04012	ErbB signaling pathway	-2.4	2	3.1	-1
								GO Biological Processes	GO:0000956	nuclear-transcribed mRNA catabolic process	-2.4	1.9	3	-1
								GO Biological Processes	GO:0016241	regulation of macroautophagy	-2.4	1.9	3	-1
								GO Biological Processes	GO:0046939	nucleotide phosphorylation	-2.4	1.9	3	-1
								GO Biological Processes	GO:0061919	process utilizing autophagic mechanism	-2.4	1.4	2.9	-1
								GO Biological Processes	GO:0006914	autophagy	-2.4	1.4	2.9	-1
								GO Biological Processes	GO:0001666	response to hypoxia	-2.4	1.6	2.9	-1
								GO Biological Processes	GO:0016055	Wnt signaling pathway	-2.4	1.4	2.9	-1
								Reactome Gene Sets	R-MMU-111465	Apoptotic cleavage of cellular proteins	-2.4	2.6	3.3	-1
								KEGG Pathway	M00035	Methionine degradation	-2.4	4.2	3.7	-1
								GO Biological Processes	GO:0090209	negative regulation of triglyceride metabolic process	-2.4	4.2	3.7	-1
								Reactome Gene Sets	R-MMU-5218921	VEGFR2 mediated cell proliferation	-2.4	4.2	3.7	-1
								GO Biological Processes	GO:0045876	positive regulation of sister chromatid cohesion	-2.4	4.2	3.7	-1
								GO Biological Processes	GO:0030953	astral microtubule organization	-2.4	4.2	3.7	-1
								KEGG Pathway	mmu_M00035	Methionine degradation	-2.4	4.2	3.7	-1
								GO Biological Processes	GO:0097113	AMPA glutamate receptor clustering	-2.4	4.2	3.7	-1
								Reactome Gene Sets	R-MMU-982772	Growth hormone receptor signaling	-2.4	4.2	3.7	-1
								GO Biological Processes	GO:0046324	regulation of glucose import	-2.4	2.1	3.1	-1
								GO Biological Processes	GO:0071248	cellular response to metal ion	-2.4	1.7	3	-1
								GO Biological Processes	GO:0045216	cell-cell junction organization	-2.4	1.7	3	-1
								GO Biological Processes	GO:0002831	regulation of response to biotic stimulus	-2.4	1.7	3	-1
								GO Biological Processes	GO:0032465	regulation of cytokinesis	-2.4	2	3.1	-1
								GO Biological Processes	GO:1902117	positive regulation of organelle assembly	-2.4	2	3.1	-1
								GO Biological Processes	GO:0016573	histone acetylation	-2.4	1.7	3	-1
								KEGG Pathway	mmu04120	Ubiquitin mediated proteolysis	-2.4	1.7	3	-1
								Reactome Gene Sets	R-MMU-3108214	SUMOylation of DNA damage response and repair proteins	-2.4	2.2	3.1	-1
								GO Biological Processes	GO:0098927	vesicle-mediated transport between endosomal compartments	-2.4	2.4	3.2	-1
								GO Biological Processes	GO:0042692	muscle cell differentiation	-2.4	1.4	2.8	-1
								GO Biological Processes	GO:0051262	protein tetramerization	-2.4	1.6	2.9	-1
								GO Biological Processes	GO:0032409	regulation of transporter activity	-2.4	1.5	2.9	-1
								GO Biological Processes	GO:0098609	cell-cell adhesion	-2.4	1.3	2.8	-1
								GO Biological Processes	GO:0045604	regulation of epidermal cell differentiation	-2.4	2.2	3.1	-1
								GO Biological Processes	GO:0051290	protein heterotetramerization	-2.4	2.2	3.1	-1
								KEGG Pathway	mmu05030	Cocaine addiction	-2.4	2.3	3.2	-1
								GO Biological Processes	GO:1902803	regulation of synaptic vesicle transport	-2.4	1.8	3	-0.99
								GO Biological Processes	GO:0051865	protein autoubiquitination	-2.4	2	3.1	-0.99
								GO Biological Processes	GO:0045920	negative regulation of exocytosis	-2.4	2.7	3.3	-0.99
								KEGG Pathway	mmu04710	Circadian rhythm	-2.4	2.7	3.3	-0.99
								GO Biological Processes	GO:0048011	neurotrophin TRK receptor signaling pathway	-2.4	2.7	3.3	-0.99
								GO Biological Processes	GO:2000781	positive regulation of double-strand break repair	-2.4	2.7	3.3	-0.99
								GO Biological Processes	GO:0070372	regulation of ERK1 and ERK2 cascade	-2.4	1.5	2.8	-0.98
								GO Biological Processes	GO:0001701	in utero embryonic development	-2.4	1.3	2.8	-0.98
								GO Biological Processes	GO:0030856	regulation of epithelial cell differentiation	-2.4	1.7	2.9	-0.98
								GO Biological Processes	GO:0051402	neuron apoptotic process	-2.3	1.5	2.8	-0.97
								Reactome Gene Sets	R-MMU-69275	G2/M Transition	-2.3	1.7	2.9	-0.97
								GO Biological Processes	GO:0002698	negative regulation of immune effector process	-2.3	1.7	2.9	-0.97
								GO Biological Processes	GO:0019058	viral life cycle	-2.3	1.6	2.9	-0.97
								Reactome Gene Sets	R-MMU-165158	Activation of AKT2	-2.3	6.9	4.1	-0.97
								GO Biological Processes	GO:0006499	N-terminal protein myristoylation	-2.3	6.9	4.1	-0.97
								GO Biological Processes	GO:1904684	negative regulation of metalloendopeptidase activity	-2.3	6.9	4.1	-0.97
								GO Biological Processes	GO:0036446	myofibroblast differentiation	-2.3	6.9	4.1	-0.97
								GO Biological Processes	GO:1904760	regulation of myofibroblast differentiation	-2.3	6.9	4.1	-0.97
								Reactome Gene Sets	R-MMU-400511	Synthesis, secretion, and inactivation of Glucose-dependent Insulinotropic Polypeptide (GIP)	-2.3	6.9	4.1	-0.97
								GO Biological Processes	GO:0018377	protein myristoylation	-2.3	6.9	4.1	-0.97
								GO Biological Processes	GO:0060125	negative regulation of growth hormone secretion	-2.3	6.9	4.1	-0.97
								GO Biological Processes	GO:0014916	regulation of lung blood pressure	-2.3	6.9	4.1	-0.97
								GO Biological Processes	GO:1904879	positive regulation of calcium ion transmembrane transport via high voltage-gated calcium channel	-2.3	6.9	4.1	-0.97
								GO Biological Processes	GO:0090074	negative regulation of protein homodimerization activity	-2.3	6.9	4.1	-0.97
								CORUM	CORUM:2954	Smad1-Notch1-p300-Pcaf complex	-2.3	6.9	4.1	-0.97
								GO Biological Processes	GO:1905205	positive regulation of connective tissue replacement	-2.3	6.9	4.1	-0.97
								GO Biological Processes	GO:0032324	molybdopterin cofactor biosynthetic process	-2.3	6.9	4.1	-0.97
								GO Biological Processes	GO:0090660	cerebrospinal fluid circulation	-2.3	6.9	4.1	-0.97
								KEGG Pathway	mmu01521	EGFR tyrosine kinase inhibitor resistance	-2.3	2	3	-0.97
								GO Biological Processes	GO:0097237	cellular response to toxic substance	-2.3	1.6	2.9	-0.97
								Reactome Gene Sets	R-MMU-5693579	Homologous DNA Pairing and Strand Exchange	-2.3	2.5	3.2	-0.96
								GO Biological Processes	GO:0086065	cell communication involved in cardiac conduction	-2.3	2.5	3.2	-0.96
								GO Biological Processes	GO:0034453	microtubule anchoring	-2.3	2.9	3.3	-0.96
								GO Biological Processes	GO:0034067	protein localization to Golgi apparatus	-2.3	2.9	3.3	-0.96
								GO Biological Processes	GO:0006275	regulation of DNA replication	-2.3	1.8	3	-0.96
								KEGG Pathway	mmu04668	TNF signaling pathway	-2.3	1.8	3	-0.96
								GO Biological Processes	GO:0032252	secretory granule localization	-2.3	3.5	3.4	-0.96
								GO Biological Processes	GO:2000479	regulation of cAMP-dependent protein kinase activity	-2.3	3.5	3.4	-0.96
								GO Biological Processes	GO:0032688	negative regulation of interferon-beta production	-2.3	3.5	3.4	-0.96
								GO Biological Processes	GO:0032535	regulation of cellular component size	-2.3	1.4	2.8	-0.96
								GO Biological Processes	GO:0044843	cell cycle G1/S phase transition	-2.3	1.6	2.9	-0.95
								KEGG Pathway	mmu04724	Glutamatergic synapse	-2.3	1.8	2.9	-0.95
								GO Biological Processes	GO:0043534	blood vessel endothelial cell migration	-2.3	1.8	2.9	-0.95
								KEGG Pathway	mmu05215	Prostate cancer	-2.3	1.9	3	-0.95
								GO Biological Processes	GO:0060079	excitatory postsynaptic potential	-2.3	1.9	3	-0.95
								KEGG Pathway	mmu05221	Acute myeloid leukemia	-2.3	2.2	3.1	-0.95
								GO Biological Processes	GO:0106106	cold-induced thermogenesis	-2.3	1.7	2.9	-0.95
								GO Biological Processes	GO:0050680	negative regulation of epithelial cell proliferation	-2.3	1.7	2.9	-0.95
								GO Biological Processes	GO:0120161	regulation of cold-induced thermogenesis	-2.3	1.7	2.9	-0.95
								GO Biological Processes	GO:0031109	microtubule polymerization or depolymerization	-2.3	1.8	2.9	-0.95
								GO Biological Processes	GO:0006633	fatty acid biosynthetic process	-2.3	1.7	2.9	-0.95
								GO Biological Processes	GO:0006261	DNA-dependent DNA replication	-2.3	1.7	2.9	-0.95
								GO Biological Processes	GO:0032527	protein exit from endoplasmic reticulum	-2.3	2.4	3.1	-0.95
								GO Biological Processes	GO:0048854	brain morphogenesis	-2.3	2.4	3.1	-0.95
								GO Biological Processes	GO:0040018	positive regulation of multicellular organism growth	-2.3	2.4	3.1	-0.95
								GO Biological Processes	GO:0006887	exocytosis	-2.3	1.4	2.8	-0.95
								GO Biological Processes	GO:0038066	p38MAPK cascade	-2.3	2.3	3.1	-0.95
								Reactome Gene Sets	R-MMU-74751	Insulin receptor signalling cascade	-2.3	2.3	3.1	-0.95
								GO Biological Processes	GO:0046834	lipid phosphorylation	-2.3	2.3	3.1	-0.95
								GO Biological Processes	GO:0140058	neuron projection arborization	-2.3	3.1	3.3	-0.95
								GO Biological Processes	GO:0051258	protein polymerization	-2.3	1.5	2.8	-0.95
								GO Biological Processes	GO:0060968	regulation of gene silencing	-2.3	1.9	2.9	-0.95
								GO Biological Processes	GO:0042866	pyruvate biosynthetic process	-2.3	1.9	2.9	-0.95
								GO Biological Processes	GO:0046887	positive regulation of hormone secretion	-2.3	1.6	2.9	-0.94
								GO Biological Processes	GO:0043113	receptor clustering	-2.3	2	3	-0.93
								GO Biological Processes	GO:0000910	cytokinesis	-2.3	1.7	2.9	-0.93
								GO Biological Processes	GO:0048736	appendage development	-2.3	1.6	2.8	-0.92
								GO Biological Processes	GO:0060173	limb development	-2.3	1.6	2.8	-0.92
								GO Biological Processes	GO:1903034	regulation of response to wounding	-2.3	1.6	2.8	-0.92
								GO Biological Processes	GO:0098660	inorganic ion transmembrane transport	-2.3	1.3	2.7	-0.92
								Reactome Gene Sets	R-MMU-453274	Mitotic G2-G2/M phases	-2.3	1.7	2.9	-0.92
								GO Biological Processes	GO:0061013	regulation of mRNA catabolic process	-2.3	1.7	2.9	-0.92
								GO Biological Processes	GO:0048545	response to steroid hormone	-2.3	1.5	2.8	-0.92
								GO Biological Processes	GO:0032271	regulation of protein polymerization	-2.3	1.5	2.8	-0.92
								GO Biological Processes	GO:0048008	platelet-derived growth factor receptor signaling pathway	-2.3	2.1	3	-0.92
								GO Biological Processes	GO:0032259	methylation	-2.3	1.4	2.7	-0.92
								GO Biological Processes	GO:0043901	negative regulation of multi-organism process	-2.2	1.6	2.8	-0.91
								GO Biological Processes	GO:0046323	glucose import	-2.2	2	2.9	-0.91
								GO Biological Processes	GO:0051193	regulation of cofactor metabolic process	-2.2	2	2.9	-0.91
								GO Biological Processes	GO:1903362	regulation of cellular protein catabolic process	-2.2	1.5	2.8	-0.91
								GO Biological Processes	GO:0043620	regulation of DNA-templated transcription in response to stress	-2.2	2.2	3	-0.9
								GO Biological Processes	GO:0014002	astrocyte development	-2.2	2.4	3.1	-0.9
								GO Biological Processes	GO:0010762	regulation of fibroblast migration	-2.2	2.4	3.1	-0.9
								GO Biological Processes	GO:0051403	stress-activated MAPK cascade	-2.2	1.5	2.7	-0.9
								KEGG Pathway	mmu04659	Th17 cell differentiation	-2.2	1.8	2.9	-0.9
								KEGG Pathway	mmu04922	Glucagon signaling pathway	-2.2	1.8	2.9	-0.9
								GO Biological Processes	GO:0043547	positive regulation of GTPase activity	-2.2	1.5	2.8	-0.9
								GO Biological Processes	GO:0010828	positive regulation of glucose transmembrane transport	-2.2	2.2	3	-0.9
								GO Biological Processes	GO:2000059	negative regulation of ubiquitin-dependent protein catabolic process	-2.2	2.2	3	-0.9
								GO Biological Processes	GO:0006333	chromatin assembly or disassembly	-2.2	1.7	2.8	-0.9
								GO Biological Processes	GO:0001935	endothelial cell proliferation	-2.2	1.7	2.8	-0.9
								GO Biological Processes	GO:0043124	negative regulation of I-kappaB kinase/NF-kappaB signaling	-2.2	2.3	3	-0.9
								GO Biological Processes	GO:0032924	activin receptor signaling pathway	-2.2	2.3	3	-0.9
								GO Biological Processes	GO:0070849	response to epidermal growth factor	-2.2	2.3	3	-0.9
								GO Biological Processes	GO:0034968	histone lysine methylation	-2.2	1.8	2.9	-0.9
								KEGG Pathway	mmu04550	Signaling pathways regulating pluripotency of stem cells	-2.2	1.7	2.8	-0.9
								GO Biological Processes	GO:0050905	neuromuscular process	-2.2	1.7	2.8	-0.9
								GO Biological Processes	GO:0030100	regulation of endocytosis	-2.2	1.5	2.7	-0.9
								GO Biological Processes	GO:0046607	positive regulation of centrosome cycle	-2.2	3.9	3.4	-0.9
								GO Biological Processes	GO:0060213	positive regulation of nuclear-transcribed mRNA poly(A) tail shortening	-2.2	3.9	3.4	-0.9
								GO Biological Processes	GO:0034088	maintenance of mitotic sister chromatid cohesion	-2.2	3.9	3.4	-0.9
								GO Biological Processes	GO:0097688	glutamate receptor clustering	-2.2	3.9	3.4	-0.9
								GO Biological Processes	GO:1905668	positive regulation of protein localization to endosome	-2.2	3.9	3.4	-0.9
								GO Biological Processes	GO:0046929	negative regulation of neurotransmitter secretion	-2.2	3.9	3.4	-0.9
								GO Biological Processes	GO:0035457	cellular response to interferon-alpha	-2.2	3.9	3.4	-0.9
								GO Biological Processes	GO:1904251	regulation of bile acid metabolic process	-2.2	3.9	3.4	-0.9
								GO Biological Processes	GO:0043407	negative regulation of MAP kinase activity	-2.2	2	2.9	-0.89
								Reactome Gene Sets	R-MMU-186763	Downstream signal transduction	-2.2	2.7	3.2	-0.89
								GO Biological Processes	GO:1903861	positive regulation of dendrite extension	-2.2	2.7	3.2	-0.89
								GO Biological Processes	GO:0016577	histone demethylation	-2.2	2.7	3.2	-0.89
								Reactome Gene Sets	R-MMU-5687128	MAPK6/MAPK4 signaling	-2.2	2.7	3.2	-0.89
								GO Biological Processes	GO:0070076	histone lysine demethylation	-2.2	2.7	3.2	-0.89
								GO Biological Processes	GO:0010721	negative regulation of cell development	-2.2	1.4	2.7	-0.88
								GO Biological Processes	GO:0002064	epithelial cell development	-2.2	1.5	2.7	-0.88
								GO Biological Processes	GO:0051098	regulation of binding	-2.2	1.4	2.7	-0.88
								GO Biological Processes	GO:0034764	positive regulation of transmembrane transport	-2.2	1.5	2.7	-0.88
								GO Biological Processes	GO:0060999	positive regulation of dendritic spine development	-2.2	2.1	2.9	-0.87
								KEGG Pathway	mmu04137	Mitophagy - animal	-2.2	2.1	2.9	-0.87
								Reactome Gene Sets	R-MMU-913531	Interferon Signaling	-2.2	2.1	2.9	-0.87
								GO Biological Processes	GO:0048041	focal adhesion assembly	-2.2	2	2.9	-0.87
								GO Biological Processes	GO:0007045	cell-substrate adherens junction assembly	-2.2	2	2.9	-0.87
								GO Biological Processes	GO:1903900	regulation of viral life cycle	-2.2	1.7	2.8	-0.87
								GO Biological Processes	GO:0018393	internal peptidyl-lysine acetylation	-2.2	1.7	2.8	-0.87
								GO Biological Processes	GO:0050714	positive regulation of protein secretion	-2.2	1.4	2.7	-0.87
								GO Biological Processes	GO:2000643	positive regulation of early endosome to late endosome transport	-2.2	4.6	3.6	-0.87
								GO Biological Processes	GO:1900107	regulation of nodal signaling pathway	-2.2	4.6	3.6	-0.87
								GO Biological Processes	GO:0035507	regulation of myosin-light-chain-phosphatase activity	-2.2	4.6	3.6	-0.87
								Reactome Gene Sets	R-MMU-8948747	Regulation of PTEN localization	-2.2	4.6	3.6	-0.87
								GO Biological Processes	GO:1900246	positive regulation of RIG-I signaling pathway	-2.2	4.6	3.6	-0.87
								GO Biological Processes	GO:0044387	negative regulation of protein kinase activity by regulation of protein phosphorylation	-2.2	4.6	3.6	-0.87
								GO Biological Processes	GO:0097062	dendritic spine maintenance	-2.2	2.9	3.2	-0.87
								GO Biological Processes	GO:0046599	regulation of centriole replication	-2.2	2.9	3.2	-0.87
								GO Biological Processes	GO:0101023	vascular endothelial cell proliferation	-2.2	2.9	3.2	-0.87
								GO Biological Processes	GO:1905562	regulation of vascular endothelial cell proliferation	-2.2	2.9	3.2	-0.87
								GO Biological Processes	GO:0010996	response to auditory stimulus	-2.2	2.9	3.2	-0.87
								Reactome Gene Sets	R-MMU-389357	CD28 dependent PI3K/Akt signaling	-2.2	2.9	3.2	-0.87
								GO Biological Processes	GO:0010666	positive regulation of cardiac muscle cell apoptotic process	-2.2	2.9	3.2	-0.87
								GO Biological Processes	GO:0006282	regulation of DNA repair	-2.2	1.7	2.8	-0.87
								GO Biological Processes	GO:0035303	regulation of dephosphorylation	-2.2	1.6	2.7	-0.86
								GO Biological Processes	GO:0000726	non-recombinational repair	-2.2	2.1	2.9	-0.86
								GO Biological Processes	GO:0048016	inositol phosphate-mediated signaling	-2.2	2.1	2.9	-0.86
								GO Biological Processes	GO:0086012	membrane depolarization during cardiac muscle cell action potential	-2.2	3.3	3.3	-0.86
								GO Biological Processes	GO:1904889	regulation of excitatory synapse assembly	-2.2	3.3	3.3	-0.86
								GO Biological Processes	GO:0000188	inactivation of MAPK activity	-2.2	3.3	3.3	-0.86
								GO Biological Processes	GO:0043367	CD4-positive, alpha-beta T cell differentiation	-2.2	1.9	2.8	-0.86
								GO Biological Processes	GO:0032467	positive regulation of cytokinesis	-2.2	2.5	3.1	-0.86
								GO Biological Processes	GO:0003002	regionalization	-2.2	1.4	2.6	-0.86
								GO Biological Processes	GO:0031056	regulation of histone modification	-2.2	1.6	2.7	-0.85
								GO Biological Processes	GO:0044057	regulation of system process	-2.2	1.3	2.6	-0.85
								GO Biological Processes	GO:0043535	regulation of blood vessel endothelial cell migration	-2.2	1.9	2.8	-0.85
								GO Biological Processes	GO:0051607	defense response to virus	-2.1	1.5	2.7	-0.85
								GO Biological Processes	GO:0019932	second-messenger-mediated signaling	-2.1	1.4	2.6	-0.85
								GO Biological Processes	GO:0007099	centriole replication	-2.1	2.4	3	-0.85
								GO Biological Processes	GO:0000070	mitotic sister chromatid segregation	-2.1	1.6	2.7	-0.85
								GO Biological Processes	GO:0048562	embryonic organ morphogenesis	-2.1	1.4	2.6	-0.85
								GO Biological Processes	GO:0099565	chemical synaptic transmission, postsynaptic	-2.1	1.8	2.8	-0.84
								GO Biological Processes	GO:0016079	synaptic vesicle exocytosis	-2.1	1.7	2.7	-0.84
								KEGG Pathway	mmu04022	cGMP-PKG signaling pathway	-2.1	1.6	2.7	-0.84
								Reactome Gene Sets	R-MMU-109581	Apoptosis	-2.1	1.8	2.8	-0.84
								GO Biological Processes	GO:0031348	negative regulation of defense response	-2.1	1.5	2.7	-0.84
								GO Biological Processes	GO:0050688	regulation of defense response to virus	-2.1	1.9	2.8	-0.83
								Reactome Gene Sets	R-MMU-5357801	Programmed Cell Death	-2.1	1.8	2.8	-0.83
								KEGG Pathway	mmu05212	Pancreatic cancer	-2.1	2	2.9	-0.83
								GO Biological Processes	GO:0045661	regulation of myoblast differentiation	-2.1	2	2.9	-0.83
								GO Biological Processes	GO:0032233	positive regulation of actin filament bundle assembly	-2.1	2	2.9	-0.83
								GO Biological Processes	GO:0043967	histone H4 acetylation	-2.1	2	2.9	-0.83
								GO Biological Processes	GO:1902807	negative regulation of cell cycle G1/S phase transition	-2.1	2	2.9	-0.83
								GO Biological Processes	GO:0010959	regulation of metal ion transport	-2.1	1.4	2.6	-0.83
								GO Biological Processes	GO:0050792	regulation of viral process	-2.1	1.6	2.7	-0.83
								GO Biological Processes	GO:0043583	ear development	-2.1	1.5	2.7	-0.83
								GO Biological Processes	GO:0018108	peptidyl-tyrosine phosphorylation	-2.1	1.4	2.6	-0.83
								GO Biological Processes	GO:0043903	regulation of symbiosis, encompassing mutualism through parasitism	-2.1	1.5	2.7	-0.83
								GO Biological Processes	GO:0042133	neurotransmitter metabolic process	-2.1	1.6	2.7	-0.82
								Reactome Gene Sets	R-MMU-5218920	VEGFR2 mediated vascular permeability	-2.1	2.6	3	-0.82
								GO Biological Processes	GO:0045663	positive regulation of myoblast differentiation	-2.1	2.6	3	-0.82
								GO Biological Processes	GO:0071168	protein localization to chromatin	-2.1	2.6	3	-0.82
								GO Biological Processes	GO:0051194	positive regulation of cofactor metabolic process	-2.1	2.6	3	-0.82
								GO Biological Processes	GO:0051984	positive regulation of chromosome segregation	-2.1	2.6	3	-0.82
								GO Biological Processes	GO:0032925	regulation of activin receptor signaling pathway	-2.1	2.6	3	-0.82
								GO Biological Processes	GO:0071695	anatomical structure maturation	-2.1	1.6	2.7	-0.82
								GO Biological Processes	GO:0043954	cellular component maintenance	-2.1	2.1	2.9	-0.82
								GO Biological Processes	GO:0002011	morphogenesis of an epithelial sheet	-2.1	2.1	2.9	-0.82
								KEGG Pathway	mmu05205	Proteoglycans in cancer	-2.1	1.5	2.7	-0.81
								GO Biological Processes	GO:1903578	regulation of ATP metabolic process	-2.1	1.8	2.8	-0.81
								GO Biological Processes	GO:0046031	ADP metabolic process	-2.1	1.8	2.7	-0.81
								GO Biological Processes	GO:0050679	positive regulation of epithelial cell proliferation	-2.1	1.5	2.6	-0.8
								GO Biological Processes	GO:1905269	positive regulation of chromatin organization	-2.1	1.7	2.7	-0.8
								GO Biological Processes	GO:0016525	negative regulation of angiogenesis	-2.1	1.7	2.7	-0.8
								GO Biological Processes	GO:0061614	pri-miRNA transcription by RNA polymerase II	-2.1	2.1	2.9	-0.8
								GO Biological Processes	GO:0001895	retina homeostasis	-2.1	2.1	2.9	-0.8
								GO Biological Processes	GO:0021587	cerebellum morphogenesis	-2.1	2.1	2.9	-0.8
								GO Biological Processes	GO:0032648	regulation of interferon-beta production	-2.1	2.1	2.9	-0.8
								GO Biological Processes	GO:0032956	regulation of actin cytoskeleton organization	-2.1	1.4	2.6	-0.8
								GO Biological Processes	GO:0062013	positive regulation of small molecule metabolic process	-2.1	1.6	2.7	-0.8
								Reactome Gene Sets	R-MMU-5693616	Presynaptic phase of homologous DNA pairing and strand exchange	-2.1	2.5	2.9	-0.79
								KEGG Pathway	mmu05166	HTLV-I infection	-2.1	1.4	2.6	-0.79
								GO Biological Processes	GO:0006898	receptor-mediated endocytosis	-2.1	1.5	2.6	-0.79
								GO Biological Processes	GO:0006475	internal protein amino acid acetylation	-2.1	1.6	2.7	-0.79
								GO Biological Processes	GO:0045022	early endosome to late endosome transport	-2.1	2.3	2.9	-0.79
								GO Biological Processes	GO:0032970	regulation of actin filament-based process	-2.1	1.4	2.6	-0.79
								GO Biological Processes	GO:1903706	regulation of hemopoiesis	-2.1	1.4	2.6	-0.79
								GO Biological Processes	GO:0034333	adherens junction assembly	-2.1	1.9	2.7	-0.78
								GO Biological Processes	GO:0039528	cytoplasmic pattern recognition receptor signaling pathway in response to virus	-2.1	2.8	3	-0.78
								GO Biological Processes	GO:0045736	negative regulation of cyclin-dependent protein serine/threonine kinase activity	-2.1	2.8	3	-0.78
								GO Biological Processes	GO:0010663	positive regulation of striated muscle cell apoptotic process	-2.1	2.8	3	-0.78
								GO Biological Processes	GO:0006346	methylation-dependent chromatin silencing	-2.1	2.8	3	-0.78
								GO Biological Processes	GO:0036293	response to decreased oxygen levels	-2.1	1.5	2.6	-0.78
								KEGG Pathway	mmu04151	PI3K-Akt signaling pathway	-2.1	1.4	2.6	-0.78
								Reactome Gene Sets	R-MMU-195258	RHO GTPase Effectors	-2.1	1.4	2.6	-0.78
								GO Biological Processes	GO:1903441	protein localization to ciliary membrane	-2	3.6	3.2	-0.78
								GO Biological Processes	GO:1902950	regulation of dendritic spine maintenance	-2	3.6	3.2	-0.78
								GO Biological Processes	GO:0045820	negative regulation of glycolytic process	-2	3.6	3.2	-0.78
								Reactome Gene Sets	R-MMU-1660516	Synthesis of PIPs at the early endosome membrane	-2	3.6	3.2	-0.78
								GO Biological Processes	GO:0034350	regulation of glial cell apoptotic process	-2	3.6	3.2	-0.78
								GO Biological Processes	GO:0090308	regulation of methylation-dependent chromatin silencing	-2	3.6	3.2	-0.78
								GO Biological Processes	GO:0035872	nucleotide-binding domain, leucine rich repeat containing receptor signaling pathway	-2	3.6	3.2	-0.78
								Reactome Gene Sets	R-MMU-5621575	CD209 (DC-SIGN) signaling	-2	3.6	3.2	-0.78
								Reactome Gene Sets	R-MMU-1502540	Signaling by Activin	-2	3.6	3.2	-0.78
								GO Biological Processes	GO:1902857	positive regulation of non-motile cilium assembly	-2	3.6	3.2	-0.78
								GO Biological Processes	GO:1905048	regulation of metallopeptidase activity	-2	3.6	3.2	-0.78
								GO Biological Processes	GO:0033169	histone H3-K9 demethylation	-2	3.6	3.2	-0.78
								GO Biological Processes	GO:0034086	maintenance of sister chromatid cohesion	-2	3.6	3.2	-0.78
								Reactome Gene Sets	R-MMU-936440	Negative regulators of DDX58/IFIH1 signaling	-2	3.6	3.2	-0.78
								GO Biological Processes	GO:0031223	auditory behavior	-2	3.6	3.2	-0.78
								GO Biological Processes	GO:1905666	regulation of protein localization to endosome	-2	3.6	3.2	-0.78
								GO Biological Processes	GO:0043467	regulation of generation of precursor metabolites and energy	-2	1.7	2.7	-0.78
								GO Biological Processes	GO:0018212	peptidyl-tyrosine modification	-2	1.4	2.6	-0.78
								GO Biological Processes	GO:0062014	negative regulation of small molecule metabolic process	-2	1.8	2.7	-0.78
								GO Biological Processes	GO:0010771	negative regulation of cell morphogenesis involved in differentiation	-2	1.8	2.7	-0.78
								GO Biological Processes	GO:1901216	positive regulation of neuron death	-2	1.7	2.7	-0.78
								GO Biological Processes	GO:0051588	regulation of neurotransmitter transport	-2	1.6	2.6	-0.78
								GO Biological Processes	GO:0018394	peptidyl-lysine acetylation	-2	1.6	2.6	-0.78
								GO Biological Processes	GO:1990845	adaptive thermogenesis	-2	1.6	2.6	-0.78
								GO Biological Processes	GO:0019359	nicotinamide nucleotide biosynthetic process	-2	1.7	2.7	-0.78
								GO Biological Processes	GO:0048661	positive regulation of smooth muscle cell proliferation	-2	1.7	2.7	-0.78
								GO Biological Processes	GO:0072525	pyridine-containing compound biosynthetic process	-2	1.7	2.7	-0.78
								GO Biological Processes	GO:1904019	epithelial cell apoptotic process	-2	1.7	2.7	-0.78
								GO Biological Processes	GO:0048608	reproductive structure development	-2	1.3	2.5	-0.78
								GO Biological Processes	GO:0045806	negative regulation of endocytosis	-2	2	2.8	-0.78
								GO Biological Processes	GO:0021756	striatum development	-2	3.1	3.1	-0.78
								GO Biological Processes	GO:0150052	regulation of postsynapse assembly	-2	3.1	3.1	-0.78
								GO Biological Processes	GO:0048791	calcium ion-regulated exocytosis of neurotransmitter	-2	3.1	3.1	-0.78
								GO Biological Processes	GO:0044321	response to leptin	-2	3.1	3.1	-0.78
								GO Biological Processes	GO:0039529	RIG-I signaling pathway	-2	3.1	3.1	-0.78
								Reactome Gene Sets	R-MMU-445144	Signal transduction by L1	-2	3.1	3.1	-0.78
								GO Biological Processes	GO:2000641	regulation of early endosome to late endosome transport	-2	3.1	3.1	-0.78
								GO Biological Processes	GO:0031281	positive regulation of cyclase activity	-2	3.1	3.1	-0.78
								GO Biological Processes	GO:0048268	clathrin coat assembly	-2	3.1	3.1	-0.78
								GO Biological Processes	GO:0099150	regulation of postsynaptic specialization assembly	-2	3.1	3.1	-0.78
								GO Biological Processes	GO:0060416	response to growth hormone	-2	3.1	3.1	-0.78
								GO Biological Processes	GO:0000082	G1/S transition of mitotic cell cycle	-2	1.6	2.6	-0.77
								GO Biological Processes	GO:0032412	regulation of ion transmembrane transporter activity	-2	1.5	2.6	-0.77
								GO Biological Processes	GO:0048872	homeostasis of number of cells	-2	1.4	2.5	-0.77
								GO Biological Processes	GO:0002218	activation of innate immune response	-2	1.6	2.6	-0.76
								GO Biological Processes	GO:0022898	regulation of transmembrane transporter activity	-2	1.4	2.5	-0.76
								GO Biological Processes	GO:0048546	digestive tract morphogenesis	-2	2.1	2.8	-0.76
								GO Biological Processes	GO:0031113	regulation of microtubule polymerization	-2	2.1	2.8	-0.76
								GO Biological Processes	GO:0030323	respiratory tube development	-2	1.5	2.6	-0.76
								Reactome Gene Sets	R-MMU-389356	CD28 co-stimulation	-2	2.6	2.9	-0.76
								GO Biological Processes	GO:0001817	regulation of cytokine production	-2	1.3	2.5	-0.76
								GO Biological Processes	GO:1901343	negative regulation of vasculature development	-2	1.7	2.6	-0.76
								Reactome Gene Sets	R-MMU-194840	Rho GTPase cycle	-2	1.7	2.6	-0.76
								GO Biological Processes	GO:0003279	cardiac septum development	-2	1.7	2.6	-0.76
								GO Biological Processes	GO:0030308	negative regulation of cell growth	-2	1.5	2.6	-0.76
								Reactome Gene Sets	R-MMU-5693532	DNA Double-Strand Break Repair	-2	1.6	2.6	-0.76
								KEGG Pathway	mmu01522	Endocrine resistance	-2	1.8	2.7	-0.75
								GO Biological Processes	GO:0010906	regulation of glucose metabolic process	-2	1.7	2.6	-0.75
								Reactome Gene Sets	R-MMU-983231	Factors involved in megakaryocyte development and platelet production	-2	1.7	2.6	-0.75
								KEGG Pathway	mmu04722	Neurotrophin signaling pathway	-2	1.7	2.6	-0.75

## Sheet: HFD-WT vs RC-WT
Upregulated								Downregulated
Category	GO	Description	LogP	Enrichment	Z-score	Log(q-value)		Category	GO	Description	LogP	Enrichment	Z-score	Log(q-value)
KEGG Pathway	mmu04141	Protein processing in endoplasmic reticulum	-29	6	16	-25		GO Biological Processes	GO:0006325	chromatin organization	-9.6	2.4	7.3	-5.4
Reactome Gene Sets	R-MMU-446203	Asparagine N-linked glycosylation	-27	4.6	15	-23		GO Biological Processes	GO:0034968	histone lysine methylation	-8.4	5.2	8.2	-4.5
GO Biological Processes	GO:0009100	glycoprotein metabolic process	-19	3.6	12	-16		GO Biological Processes	GO:0032870	cellular response to hormone stimulus	-8.2	2.6	6.8	-4.4
GO Biological Processes	GO:0006487	protein N-linked glycosylation	-18	8.1	13	-14		GO Biological Processes	GO:0018022	peptidyl-lysine methylation	-7.6	4.6	7.5	-3.9
GO Biological Processes	GO:0006888	ER to Golgi vesicle-mediated transport	-18	5.5	12	-14		GO Biological Processes	GO:0016571	histone methylation	-7.4	4.3	7.3	-3.9
GO Biological Processes	GO:1901137	carbohydrate derivative biosynthetic process	-17	2.7	10	-13		KEGG Pathway	mmu04211	Longevity regulating pathway	-7.3	5.3	7.6	-3.9
GO Biological Processes	GO:0043413	macromolecule glycosylation	-17	4.3	11	-13		GO Biological Processes	GO:0016569	covalent chromatin modification	-7.3	2.6	6.4	-3.9
GO Biological Processes	GO:0006486	protein glycosylation	-17	4.3	11	-13		GO Biological Processes	GO:0016570	histone modification	-7.2	2.6	6.4	-3.9
GO Biological Processes	GO:0070085	glycosylation	-16	4.1	11	-13		GO Biological Processes	GO:1905114	cell surface receptor signaling pathway involved in cell-cell signaling	-7.1	2.4	6.2	-3.8
GO Biological Processes	GO:0034976	response to endoplasmic reticulum stress	-16	3.9	11	-13		GO Biological Processes	GO:0007610	behavior	-6.9	2.2	6	-3.7
GO Biological Processes	GO:0009101	glycoprotein biosynthetic process	-16	3.6	10	-13		GO Biological Processes	GO:0008213	protein alkylation	-6.9	3.7	6.8	-3.7
Reactome Gene Sets	R-MMU-948021	Transport to the Golgi and subsequent modification	-16	4.2	11	-12		GO Biological Processes	GO:0006479	protein methylation	-6.9	3.7	6.8	-3.7
GO Biological Processes	GO:0032527	protein exit from endoplasmic reticulum	-15	9	13	-12		GO Biological Processes	GO:0099565	chemical synaptic transmission, postsynaptic	-6.9	4.9	7.2	-3.7
GO Biological Processes	GO:1903513	endoplasmic reticulum to cytosol transport	-15	12	13	-12		GO Biological Processes	GO:0072657	protein localization to membrane	-6.7	2.4	6	-3.6
GO Biological Processes	GO:0030970	retrograde protein transport, ER to cytosol	-15	12	13	-12		GO Biological Processes	GO:0046578	regulation of Ras protein signal transduction	-6.6	3.3	6.4	-3.6
GO Biological Processes	GO:0048193	Golgi vesicle transport	-15	3.5	10	-12		GO Biological Processes	GO:0016358	dendrite development	-6.6	2.9	6.2	-3.6
KEGG Pathway	mmu00510	N-Glycan biosynthesis	-14	7.9	12	-11		GO Biological Processes	GO:0050808	synapse organization	-6.6	2.5	6	-3.6
Reactome Gene Sets	R-MMU-199977	ER to Golgi Anterograde Transport	-13	4.2	9.8	-10		GO Biological Processes	GO:0071417	cellular response to organonitrogen compound	-6.6	2.3	5.9	-3.6
Reactome Gene Sets	R-MMU-199991	Membrane Trafficking	-12	2.4	8.1	-8.7		GO Biological Processes	GO:0072330	monocarboxylic acid biosynthetic process	-6.5	3	6.2	-3.5
Reactome Gene Sets	R-MMU-5653656	Vesicle-mediated transport	-11	2.3	7.8	-8.2		GO Biological Processes	GO:0009725	response to hormone	-6.4	2.1	5.7	-3.4
KEGG Pathway	mmu03060	Protein export	-11	8.8	11	-8		GO Biological Processes	GO:0045936	negative regulation of phosphate metabolic process	-6.2	2.3	5.7	-3.3
Reactome Gene Sets	R-MMU-446193	Biosynthesis of the N-glycan precursor (dolichol lipid-linked oligosaccharide, LLO) and transfer to	-11	5.6	9.4	-7.9		GO Biological Processes	GO:0010563	negative regulation of phosphorus metabolic process	-6.2	2.3	5.7	-3.3
GO Biological Processes	GO:0036503	ERAD pathway	-11	4.8	9	-7.7		GO Biological Processes	GO:0030029	actin filament-based process	-6.2	2.1	5.6	-3.3
GO Biological Processes	GO:0070972	protein localization to endoplasmic reticulum	-10	6	9.4	-7.6		GO Biological Processes	GO:0051056	regulation of small GTPase mediated signal transduction	-6.1	3	6	-3.3
GO Biological Processes	GO:0030433	ubiquitin-dependent ERAD pathway	-10	5.4	9	-7.2		GO Biological Processes	GO:0120039	plasma membrane bounded cell projection morphogenesis	-6.1	2.1	5.5	-3.3
Reactome Gene Sets	R-MMU-6811442	Intra-Golgi and retrograde Golgi-to-ER traffic	-9.7	3.3	7.8	-6.8		GO Biological Processes	GO:0044283	small molecule biosynthetic process	-6.1	2.1	5.5	-3.3
GO Biological Processes	GO:1904152	regulation of retrograde protein transport, ER to cytosol	-9.5	14	11	-6.7		GO Biological Processes	GO:1901699	cellular response to nitrogen compound	-6.1	2.2	5.6	-3.3
GO Biological Processes	GO:1905897	regulation of response to endoplasmic reticulum stress	-9.4	5.1	8.6	-6.6		GO Biological Processes	GO:0048858	cell projection morphogenesis	-6	2.1	5.5	-3.2
GO Biological Processes	GO:0035966	response to topologically incorrect protein	-9.4	3.9	8	-6.6		GO Biological Processes	GO:0032990	cell part morphogenesis	-6	2.1	5.5	-3.2
Reactome Gene Sets	R-MMU-6807878	COPI-mediated anterograde transport	-9.1	4.3	8.1	-6.3		GO Biological Processes	GO:0010506	regulation of autophagy	-6	3	5.9	-3.2
GO Biological Processes	GO:0045047	protein targeting to ER	-9	7.5	9.1	-6.2		GO Biological Processes	GO:0060079	excitatory postsynaptic potential	-5.9	4.8	6.6	-3.2
GO Biological Processes	GO:0045454	cell redox homeostasis	-9	5.3	8.4	-6.2		GO Biological Processes	GO:0060078	regulation of postsynaptic membrane potential	-5.9	4.2	6.4	-3.2
Reactome Gene Sets	R-MMU-6811434	COPI-dependent Golgi-to-ER retrograde traffic	-8.8	4.3	7.9	-6		GO Biological Processes	GO:0030036	actin cytoskeleton organization	-5.9	2.1	5.4	-3.1
GO Biological Processes	GO:0018279	protein N-linked glycosylation via asparagine	-8.7	9.7	9.5	-6		GO Biological Processes	GO:0051568	histone H3-K4 methylation	-5.8	6.1	6.9	-3.1
GO Biological Processes	GO:0007030	Golgi organization	-8.4	3.8	7.5	-5.7		GO Biological Processes	GO:1901653	cellular response to peptide	-5.8	2.8	5.7	-3.1
GO Biological Processes	GO:0018196	peptidyl-asparagine modification	-8.4	9.2	9.3	-5.7		GO Biological Processes	GO:0062012	regulation of small molecule metabolic process	-5.8	2.6	5.6	-3.1
Reactome Gene Sets	R-MMU-204005	COPII-mediated vesicle transport	-8.4	4.7	7.9	-5.7		GO Biological Processes	GO:0045664	regulation of neuron differentiation	-5.7	2	5.3	-3
GO Biological Processes	GO:1904292	regulation of ERAD pathway	-8.3	8.1	8.9	-5.6		GO Biological Processes	GO:0032787	monocarboxylic acid metabolic process	-5.7	2.2	5.3	-3
GO Biological Processes	GO:0072599	establishment of protein localization to endoplasmic reticulum	-8.2	6.7	8.5	-5.6		GO Biological Processes	GO:0031329	regulation of cellular catabolic process	-5.7	2.1	5.3	-3
GO Biological Processes	GO:0006457	protein folding	-8.1	3.4	7.2	-5.5		GO Biological Processes	GO:0006090	pyruvate metabolic process	-5.7	4	6.2	-3
KEGG Pathway	M00055	N-glycan precursor biosynthesis	-8	11	9.5	-5.4		GO Biological Processes	GO:0046394	carboxylic acid biosynthetic process	-5.6	2.5	5.5	-3
KEGG Pathway	mmu_M00055	N-glycan precursor biosynthesis	-8	11	9.5	-5.4		GO Biological Processes	GO:0031929	TOR signaling	-5.6	4	6.1	-3
Reactome Gene Sets	R-MMU-8856688	Golgi-to-ER retrograde transport	-8	3.6	7.2	-5.3		GO Biological Processes	GO:0016053	organic acid biosynthetic process	-5.6	2.5	5.5	-3
GO Biological Processes	GO:0070861	regulation of protein exit from endoplasmic reticulum	-7.9	8.4	8.7	-5.3		GO Biological Processes	GO:0032868	response to insulin	-5.6	3	5.7	-3
GO Biological Processes	GO:0006986	response to unfolded protein	-7.8	3.9	7.3	-5.2		GO Biological Processes	GO:0019359	nicotinamide nucleotide biosynthetic process	-5.6	4.2	6.2	-3
GO Biological Processes	GO:0006490	oligosaccharide-lipid intermediate biosynthetic process	-7.8	13	9.6	-5.2		GO Biological Processes	GO:0007169	transmembrane receptor protein tyrosine kinase signaling pathway	-5.6	2.2	5.3	-3
GO Biological Processes	GO:0006890	retrograde vesicle-mediated transport, Golgi to ER	-7.7	6.2	8	-5.1		GO Biological Processes	GO:0009896	positive regulation of catabolic process	-5.6	2.4	5.4	-3
GO Biological Processes	GO:0006614	SRP-dependent cotranslational protein targeting to membrane	-7	9.3	8.4	-4.4		GO Biological Processes	GO:0050804	modulation of chemical synaptic transmission	-5.5	2.1	5.2	-3
GO Biological Processes	GO:0006613	cotranslational protein targeting to membrane	-6.7	8.8	8.1	-4.2		GO Biological Processes	GO:0071375	cellular response to peptide hormone stimulus	-5.5	2.9	5.6	-3
KEGG Pathway	mmu04142	Lysosome	-6.4	3.3	6.2	-3.8		GO Biological Processes	GO:0035264	multicellular organism growth	-5.5	3.1	5.7	-3
Reactome Gene Sets	R-MMU-69278	Cell Cycle, Mitotic	-6.2	2	5.5	-3.7		GO Biological Processes	GO:0042866	pyruvate biosynthetic process	-5.5	4.4	6.2	-3
Reactome Gene Sets	R-MMU-1640170	Cell Cycle	-6.2	2	5.5	-3.7		GO Biological Processes	GO:0099177	regulation of trans-synaptic signaling	-5.5	2.1	5.2	-3
Reactome Gene Sets	R-MMU-446219	Synthesis of substrates in N-glycan biosythesis	-6.2	4.5	6.6	-3.6		GO Biological Processes	GO:0019363	pyridine nucleotide biosynthetic process	-5.4	4.1	6	-2.9
GO Biological Processes	GO:1904153	negative regulation of retrograde protein transport, ER to cytosol	-6.1	13	8.5	-3.6		GO Biological Processes	GO:0006109	regulation of carbohydrate metabolic process	-5.3	3.2	5.6	-2.8
Reactome Gene Sets	R-MMU-6798695	Neutrophil degranulation	-6	1.9	5.4	-3.5		GO Biological Processes	GO:0048812	neuron projection morphogenesis	-5.3	2	5	-2.8
GO Biological Processes	GO:0006520	cellular amino acid metabolic process	-6	2.4	5.6	-3.5		GO Biological Processes	GO:0031060	regulation of histone methylation	-5.3	4.9	6.2	-2.8
GO Biological Processes	GO:1904293	negative regulation of ERAD pathway	-5.9	10	7.9	-3.4		GO Biological Processes	GO:0031062	positive regulation of histone methylation	-5.3	6.7	6.7	-2.7
GO Biological Processes	GO:1903573	negative regulation of response to endoplasmic reticulum stress	-5.9	5.3	6.7	-3.4		GO Biological Processes	GO:0072525	pyridine-containing compound biosynthetic process	-5.2	3.9	5.9	-2.7
GO Biological Processes	GO:0010256	endomembrane system organization	-5.9	2.1	5.4	-3.4		GO Biological Processes	GO:1901652	response to peptide	-5.1	2.4	5.2	-2.7
GO Biological Processes	GO:0043161	proteasome-mediated ubiquitin-dependent protein catabolic process	-5.9	2.1	5.4	-3.4		GO Biological Processes	GO:0050803	regulation of synapse structure or activity	-5.1	2.7	5.3	-2.6
GO Biological Processes	GO:0035967	cellular response to topologically incorrect protein	-5.8	3.5	6	-3.3		Reactome Gene Sets	R-MMU-163685	Integration of energy metabolism	-5.1	4.7	6	-2.6
GO Biological Processes	GO:0010498	proteasomal protein catabolic process	-5.8	2	5.3	-3.3		GO Biological Processes	GO:0002262	myeloid cell homeostasis	-5.1	3.2	5.5	-2.6
GO Biological Processes	GO:1901605	alpha-amino acid metabolic process	-5.7	2.6	5.6	-3.2		GO Biological Processes	GO:0009135	purine nucleoside diphosphate metabolic process	-5	4	5.8	-2.6
GO Biological Processes	GO:0006465	signal peptide processing	-5.6	9.5	7.5	-3.2		GO Biological Processes	GO:0009179	purine ribonucleoside diphosphate metabolic process	-5	4	5.8	-2.6
GO Biological Processes	GO:0070862	negative regulation of protein exit from endoplasmic reticulum	-5.6	12	7.9	-3.2		GO Biological Processes	GO:0032869	cellular response to insulin stimulus	-5	3.1	5.4	-2.6
GO Biological Processes	GO:0006488	dolichol-linked oligosaccharide biosynthetic process	-5.6	12	7.9	-3.2		KEGG Pathway	mmu04068	FoxO signaling pathway	-5	3.6	5.6	-2.6
GO Biological Processes	GO:0051604	protein maturation	-5.6	2.2	5.3	-3.2		GO Biological Processes	GO:0006096	glycolytic process	-5	4.3	5.8	-2.6
Reactome Gene Sets	R-MMU-69620	Cell Cycle Checkpoints	-5.5	2.5	5.4	-3.1		GO Biological Processes	GO:0048872	homeostasis of number of cells	-5	2.5	5.2	-2.6
GO Biological Processes	GO:0030968	endoplasmic reticulum unfolded protein response	-5.5	4.3	6.1	-3.1		GO Biological Processes	GO:0038202	TORC1 signaling	-5	6.2	6.4	-2.6
GO Biological Processes	GO:0033365	protein localization to organelle	-5.4	1.7	4.9	-3		GO Biological Processes	GO:0006757	ATP generation from ADP	-5	4.3	5.8	-2.6
GO Biological Processes	GO:0051603	proteolysis involved in cellular protein catabolic process	-5.3	1.8	4.9	-2.9		GO Biological Processes	GO:0042326	negative regulation of phosphorylation	-4.9	2.2	5	-2.5
GO Biological Processes	GO:0044257	cellular protein catabolic process	-5.3	1.7	4.9	-2.9		GO Biological Processes	GO:0007265	Ras protein signal transduction	-4.9	2.3	5	-2.5
CORUM	CORUM:413	(ER)-localized multiprotein complex, Ig heavy chains associated	-5.2	11	7.4	-2.9		Reactome Gene Sets	R-MMU-112316	Neuronal System	-4.9	2.5	5	-2.5
GO Biological Processes	GO:0072657	protein localization to membrane	-5	1.8	4.8	-2.7		GO Biological Processes	GO:0009185	ribonucleoside diphosphate metabolic process	-4.9	3.9	5.6	-2.5
Reactome Gene Sets	R-MMU-69002	DNA Replication Pre-Initiation	-5	3.5	5.5	-2.6		GO Biological Processes	GO:0050905	neuromuscular process	-4.8	3.5	5.4	-2.4
KEGG Pathway	M00072	N-glycosylation by oligosaccharyltransferase	-5	13	7.5	-2.6		GO Biological Processes	GO:0043434	response to peptide hormone	-4.8	2.5	5	-2.4
KEGG Pathway	mmu_M00072	N-glycosylation by oligosaccharyltransferase	-5	13	7.5	-2.6		GO Biological Processes	GO:0120035	regulation of plasma membrane bounded cell projection organization	-4.8	1.9	4.7	-2.4
GO Biological Processes	GO:0043648	dicarboxylic acid metabolic process	-4.8	3.2	5.3	-2.4		GO Biological Processes	GO:1990778	protein localization to cell periphery	-4.8	2.4	5	-2.4
GO Biological Processes	GO:0034620	cellular response to unfolded protein	-4.8	3.5	5.4	-2.4		GO Biological Processes	GO:0007626	locomotory behavior	-4.8	2.7	5.1	-2.4
GO Biological Processes	GO:0006493	protein O-linked glycosylation	-4.7	3.9	5.4	-2.3		GO Biological Processes	GO:0050885	neuromuscular process controlling balance	-4.8	4.7	5.8	-2.4
GO Biological Processes	GO:0060628	regulation of ER to Golgi vesicle-mediated transport	-4.7	7.3	6.3	-2.3		GO Biological Processes	GO:0018205	peptidyl-lysine modification	-4.7	2.4	4.9	-2.4
KEGG Pathway	mmu00515	Mannose type O-glycan biosynthesis	-4.6	6.1	6	-2.3		GO Biological Processes	GO:0030534	adult behavior	-4.7	3	5.2	-2.4
GO Biological Processes	GO:0016485	protein processing	-4.6	2.3	4.8	-2.3		GO Biological Processes	GO:1905475	regulation of protein localization to membrane	-4.7	3	5.2	-2.4
KEGG Pathway	mmu00230	Purine metabolism	-4.6	2.5	4.9	-2.3		GO Biological Processes	GO:0006110	regulation of glycolytic process	-4.7	5.8	6.1	-2.4
CORUM	CORUM:3146	Coatomer-Arf1 complex	-4.6	11	7	-2.2		GO Biological Processes	GO:0030811	regulation of nucleotide catabolic process	-4.7	5.8	6.1	-2.4
GO Biological Processes	GO:0055086	nucleobase-containing small molecule metabolic process	-4.5	1.7	4.4	-2.2		GO Biological Processes	GO:0031344	regulation of cell projection organization	-4.7	1.9	4.6	-2.3
GO Biological Processes	GO:0019941	modification-dependent protein catabolic process	-4.4	1.7	4.4	-2.1		KEGG Pathway	mmu04152	AMPK signaling pathway	-4.7	3.5	5.3	-2.3
Reactome Gene Sets	R-MMU-68962	Activation of the pre-replicative complex	-4.3	5	5.5	-2		Reactome Gene Sets	R-MMU-212436	Generic Transcription Pathway	-4.6	1.9	4.6	-2.3
CORUM	CORUM:414	(ER)-localized multiprotein complex, in absence of Ig heavy chains	-4.2	9.8	6.5	-1.9		GO Biological Processes	GO:0046031	ADP metabolic process	-4.6	3.9	5.5	-2.3
GO Biological Processes	GO:0043632	modification-dependent macromolecule catabolic process	-4.2	1.7	4.2	-1.9		GO Biological Processes	GO:0009755	hormone-mediated signaling pathway	-4.6	3.2	5.2	-2.3
GO Biological Processes	GO:0099550	trans-synaptic signaling, modulating synaptic transmission	-4.2	7.6	6	-1.9		GO Biological Processes	GO:1903432	regulation of TORC1 signaling	-4.6	6.4	6.2	-2.3
Reactome Gene Sets	R-MMU-2980736	Peptide hormone metabolism	-4.1	3.5	4.9	-1.9		Reactome Gene Sets	R-MMU-9006925	Intracellular signaling by second messengers	-4.6	2.9	5	-2.3
GO Biological Processes	GO:0009064	glutamine family amino acid metabolic process	-4.1	3.5	4.9	-1.9		GO Biological Processes	GO:0048589	developmental growth	-4.6	1.9	4.5	-2.3
GO Biological Processes	GO:0035268	protein mannosylation	-4.1	6.2	5.7	-1.8		GO Biological Processes	GO:0072659	protein localization to plasma membrane	-4.6	2.6	4.9	-2.3
Reactome Gene Sets	R-MMU-71403	Citric acid cycle (TCA cycle)	-4.1	6.2	5.7	-1.8		GO Biological Processes	GO:0031331	positive regulation of cellular catabolic process	-4.5	2.3	4.8	-2.3
GO Biological Processes	GO:0006511	ubiquitin-dependent protein catabolic process	-4.1	1.7	4.2	-1.8		GO Biological Processes	GO:0032006	regulation of TOR signaling	-4.5	3.9	5.4	-2.2
GO Biological Processes	GO:0000278	mitotic cell cycle	-4.1	1.6	4.1	-1.8		GO Biological Processes	GO:0019216	regulation of lipid metabolic process	-4.5	2.4	4.8	-2.2
GO Biological Processes	GO:0048194	Golgi vesicle budding	-4.1	4.7	5.2	-1.8		Reactome Gene Sets	R-MMU-4839726	Chromatin organization	-4.5	3	5	-2.2
GO Biological Processes	GO:1903047	mitotic cell cycle process	-4.1	1.7	4.1	-1.8		Reactome Gene Sets	R-MMU-3247509	Chromatin modifying enzymes	-4.5	3	5	-2.2
KEGG Pathway	mmu00330	Arginine and proline metabolism	-4	3.9	5	-1.8		GO Biological Processes	GO:0060322	head development	-4.4	1.9	4.5	-2.2
GO Biological Processes	GO:0005975	carbohydrate metabolic process	-4	1.7	4.2	-1.8		GO Biological Processes	GO:0003249	cell proliferation involved in heart valve morphogenesis	-4.4	30	9.3	-2.2
GO Biological Processes	GO:0035269	protein O-linked mannosylation	-4	7.1	5.8	-1.7		GO Biological Processes	GO:0003250	regulation of cell proliferation involved in heart valve morphogenesis	-4.4	30	9.3	-2.2
GO Biological Processes	GO:0097502	mannosylation	-4	5.9	5.5	-1.7		GO Biological Processes	GO:0050807	regulation of synapse organization	-4.4	2.6	4.8	-2.2
Reactome Gene Sets	R-MMU-71406	Pyruvate metabolism and Citric Acid (TCA) cycle	-4	3.8	4.9	-1.7		GO Biological Processes	GO:0042593	glucose homeostasis	-4.4	2.6	4.8	-2.2
GO Biological Processes	GO:0035437	maintenance of protein localization in endoplasmic reticulum	-3.9	8.8	6.1	-1.7		GO Biological Processes	GO:1902275	regulation of chromatin organization	-4.4	2.9	4.9	-2.2
Reactome Gene Sets	R-MMU-162658	Golgi Cisternae Pericentriolar Stack Reorganization	-3.9	8.8	6.1	-1.7		GO Biological Processes	GO:0043414	macromolecule methylation	-4.4	2.5	4.8	-2.2
Reactome Gene Sets	R-MMU-421837	Clathrin derived vesicle budding	-3.9	3.3	4.7	-1.7		GO Biological Processes	GO:0033500	carbohydrate homeostasis	-4.4	2.6	4.8	-2.2
Reactome Gene Sets	R-MMU-199992	trans-Golgi Network Vesicle Budding	-3.9	3.3	4.7	-1.7		GO Biological Processes	GO:0030336	negative regulation of cell migration	-4.4	2.6	4.8	-2.2
Reactome Gene Sets	R-MMU-69481	G2/M Checkpoints	-3.9	2.9	4.6	-1.7		GO Biological Processes	GO:1990048	anterograde neuronal dense core vesicle transport	-4.4	17	7.9	-2.2
GO Biological Processes	GO:0061136	regulation of proteasomal protein catabolic process	-3.9	2.3	4.3	-1.7		GO Biological Processes	GO:0006165	nucleoside diphosphate phosphorylation	-4.4	3.8	5.2	-2.2
Reactome Gene Sets	R-MMU-983170	Antigen Presentation: Folding, assembly and peptide loading of class I MHC	-3.9	4.4	5	-1.6		GO Biological Processes	GO:0022604	regulation of cell morphogenesis	-4.4	2	4.5	-2.2
Reactome Gene Sets	R-MMU-532668	N-glycan trimming in the ER and Calnexin/Calreticulin cycle	-3.8	5.6	5.3	-1.6		GO Biological Processes	GO:2001169	regulation of ATP biosynthetic process	-4.4	4.7	5.5	-2.1
Reactome Gene Sets	R-MMU-8957275	Post-translational protein phosphorylation	-3.8	2.6	4.4	-1.6		Reactome Gene Sets	R-MMU-1257604	PIP3 activates AKT signaling	-4.3	2.9	4.9	-2.1
Reactome Gene Sets	R-MMU-2132295	MHC class II antigen presentation	-3.8	2.6	4.4	-1.6		GO Biological Processes	GO:0007264	small GTPase mediated signal transduction	-4.3	2.1	4.5	-2.1
Reactome Gene Sets	R-MMU-5358346	Hedgehog ligand biogenesis	-3.8	6.6	5.5	-1.6		GO Biological Processes	GO:0042594	response to starvation	-4.3	3	4.9	-2.1
GO Biological Processes	GO:0090407	organophosphate biosynthetic process	-3.8	1.7	4	-1.6		GO Biological Processes	GO:0035023	regulation of Rho protein signal transduction	-4.3	3.3	5	-2.1
Reactome Gene Sets	R-MMU-176187	Activation of ATR in response to replication stress	-3.8	4.3	4.9	-1.6		GO Biological Processes	GO:0001655	urogenital system development	-4.3	2.3	4.6	-2.1
GO Biological Processes	GO:1904154	positive regulation of retrograde protein transport, ER to cytosol	-3.7	18	7.1	-1.6		GO Biological Processes	GO:0046939	nucleotide phosphorylation	-4.3	3.7	5.1	-2.1
GO Biological Processes	GO:0006489	dolichyl diphosphate biosynthetic process	-3.7	18	7.1	-1.6		GO Biological Processes	GO:0007420	brain development	-4.3	1.9	4.4	-2.1
GO Biological Processes	GO:0046465	dolichyl diphosphate metabolic process	-3.7	18	7.1	-1.6		GO Biological Processes	GO:0010675	regulation of cellular carbohydrate metabolic process	-4.3	3.1	4.9	-2.1
Reactome Gene Sets	R-MMU-453279	Mitotic G1-G1/S phases	-3.7	3	4.5	-1.5		GO Biological Processes	GO:0009132	nucleoside diphosphate metabolic process	-4.2	3.4	5	-2.1
Reactome Gene Sets	R-MMU-69306	DNA Replication	-3.7	2.6	4.3	-1.5		GO Biological Processes	GO:0031056	regulation of histone modification	-4.2	3.1	4.9	-2.1
GO Biological Processes	GO:0006616	SRP-dependent cotranslational protein targeting to membrane, translocation	-3.7	8	5.7	-1.5		KEGG Pathway	mmu04150	mTOR signaling pathway	-4.2	3.1	4.9	-2.1
GO Biological Processes	GO:1903018	regulation of glycoprotein metabolic process	-3.7	3.8	4.7	-1.5		GO Biological Processes	GO:0045926	negative regulation of growth	-4.2	2.5	4.6	-2
Reactome Gene Sets	R-MMU-5694530	Cargo concentration in the ER	-3.7	4.2	4.8	-1.5		GO Biological Processes	GO:0045446	endothelial cell differentiation	-4.2	3.6	5	-2
KEGG Pathway	mmu04110	Cell cycle	-3.7	2.6	4.3	-1.5		GO Biological Processes	GO:0030178	negative regulation of Wnt signaling pathway	-4.2	3.1	4.8	-2
Reactome Gene Sets	R-MMU-69206	G1/S Transition	-3.7	3.5	4.6	-1.5		GO Biological Processes	GO:0098815	modulation of excitatory postsynaptic potential	-4.1	5	5.4	-2
GO Biological Processes	GO:0006900	vesicle budding from membrane	-3.7	3.5	4.6	-1.5		GO Biological Processes	GO:0008344	adult locomotory behavior	-4.1	3.5	5	-2
Reactome Gene Sets	R-MMU-422085	Synthesis, secretion, and deacylation of Ghrelin	-3.6	6.2	5.3	-1.5		GO Biological Processes	GO:0051493	regulation of cytoskeleton organization	-4.1	2	4.3	-2
GO Biological Processes	GO:0006099	tricarboxylic acid cycle	-3.6	4.6	4.9	-1.5		GO Biological Processes	GO:0043470	regulation of carbohydrate catabolic process	-4.1	4.9	5.4	-1.9
Reactome Gene Sets	R-MMU-71387	Metabolism of carbohydrates	-3.6	2.1	4	-1.5		GO Biological Processes	GO:2000146	negative regulation of cell motility	-4.1	2.4	4.5	-1.9
Reactome Gene Sets	R-MMU-68867	Assembly of the pre-replicative complex	-3.6	3.3	4.5	-1.5		GO Biological Processes	GO:0046496	nicotinamide nucleotide metabolic process	-4.1	3	4.7	-1.9
GO Biological Processes	GO:0016050	vesicle organization	-3.6	2	4	-1.4		GO Biological Processes	GO:0016052	carbohydrate catabolic process	-4	3.1	4.8	-1.9
GO Biological Processes	GO:0006605	protein targeting	-3.5	2	4	-1.4		GO Biological Processes	GO:0106106	cold-induced thermogenesis	-4	3.1	4.8	-1.9
GO Biological Processes	GO:0032387	negative regulation of intracellular transport	-3.5	3.2	4.4	-1.4		GO Biological Processes	GO:0120161	regulation of cold-induced thermogenesis	-4	3.1	4.8	-1.9
GO Biological Processes	GO:0051640	organelle localization	-3.5	1.6	3.8	-1.4		KEGG Pathway	mmu04360	Axon guidance	-4	2.9	4.7	-1.9
GO Biological Processes	GO:0006108	malate metabolic process	-3.5	10	5.9	-1.4		GO Biological Processes	GO:0048667	cell morphogenesis involved in neuron differentiation	-4	1.9	4.2	-1.9
CORUM	CORUM:3145	Coatomer complex	-3.5	10	5.9	-1.4		GO Biological Processes	GO:0051196	regulation of coenzyme metabolic process	-4	4.8	5.3	-1.9
GO Biological Processes	GO:0006621	protein retention in ER lumen	-3.5	10	5.9	-1.4		GO Biological Processes	GO:0051571	positive regulation of histone H3-K4 methylation	-4	9.9	6.4	-1.9
GO Biological Processes	GO:0070070	proton-transporting V-type ATPase complex assembly	-3.5	10	5.9	-1.4		GO Biological Processes	GO:0043467	regulation of generation of precursor metabolites and energy	-4	3.3	4.8	-1.9
KEGG Pathway	mmu00020	Citrate cycle (TCA cycle)	-3.5	4.4	4.7	-1.4		GO Biological Processes	GO:0006306	DNA methylation	-4	4.3	5.1	-1.9
KEGG Pathway	mmu00052	Galactose metabolism	-3.5	4.4	4.7	-1.4		GO Biological Processes	GO:0006305	DNA alkylation	-4	4.3	5.1	-1.9
GO Biological Processes	GO:0006101	citrate metabolic process	-3.5	4.4	4.7	-1.4		GO Biological Processes	GO:0072001	renal system development	-4	2.4	4.4	-1.9
GO Biological Processes	GO:0071712	ER-associated misfolded protein catabolic process	-3.5	7.4	5.4	-1.4		GO Biological Processes	GO:0031058	positive regulation of histone modification	-4	3.7	4.9	-1.9
GO Biological Processes	GO:0000281	mitotic cytokinesis	-3.5	3.2	4.3	-1.4		GO Biological Processes	GO:1905269	positive regulation of chromatin organization	-4	3.5	4.9	-1.9
KEGG Pathway	mmu00520	Amino sugar and nucleotide sugar metabolism	-3.4	3.6	4.5	-1.4		GO Biological Processes	GO:0019362	pyridine nucleotide metabolic process	-4	3	4.7	-1.9
Reactome Gene Sets	R-MMU-8982491	Glycogen metabolism	-3.4	4.9	4.8	-1.4		GO Biological Processes	GO:0009108	coenzyme biosynthetic process	-4	2.8	4.6	-1.9
GO Biological Processes	GO:0065002	intracellular protein transmembrane transport	-3.4	3.3	4.4	-1.4		GO Biological Processes	GO:0030308	negative regulation of cell growth	-4	2.8	4.6	-1.9
Reactome Gene Sets	R-MMU-15869	Metabolism of nucleotides	-3.4	2.7	4.1	-1.3		GO Biological Processes	GO:0099173	postsynapse organization	-4	2.7	4.6	-1.9
GO Biological Processes	GO:0044272	sulfur compound biosynthetic process	-3.4	2.9	4.2	-1.3		GO Biological Processes	GO:0007266	Rho protein signal transduction	-4	2.7	4.6	-1.9
GO Biological Processes	GO:0071806	protein transmembrane transport	-3.4	3.3	4.3	-1.3		GO Biological Processes	GO:0061647	histone H3-K9 modification	-4	5.3	5.4	-1.9
GO Biological Processes	GO:1990778	protein localization to cell periphery	-3.3	1.8	3.7	-1.3		GO Biological Processes	GO:0031346	positive regulation of cell projection organization	-3.9	2	4.2	-1.9
GO Biological Processes	GO:0006891	intra-Golgi vesicle-mediated transport	-3.3	4.7	4.7	-1.3		GO Biological Processes	GO:0050890	cognition	-3.9	2.3	4.4	-1.8
Reactome Gene Sets	R-MMU-2500257	Resolution of Sister Chromatid Cohesion	-3.3	2.5	4	-1.3		KEGG Pathway	mmu04724	Glutamatergic synapse	-3.9	3.4	4.8	-1.8
GO Biological Processes	GO:0090317	negative regulation of intracellular protein transport	-3.3	3.8	4.4	-1.3		GO Biological Processes	GO:0006914	autophagy	-3.9	2.2	4.3	-1.8
GO Biological Processes	GO:0070863	positive regulation of protein exit from endoplasmic reticulum	-3.3	6.8	5.1	-1.2		GO Biological Processes	GO:0061919	process utilizing autophagic mechanism	-3.9	2.2	4.3	-1.8
GO Biological Processes	GO:0006491	N-glycan processing	-3.3	6.8	5.1	-1.2		GO Biological Processes	GO:0035418	protein localization to synapse	-3.9	3.9	4.9	-1.8
Reactome Gene Sets	R-MMU-3322077	Glycogen synthesis	-3.3	6.8	5.1	-1.2		GO Biological Processes	GO:0009206	purine ribonucleoside triphosphate biosynthetic process	-3.9	3	4.6	-1.8
GO Biological Processes	GO:1903050	regulation of proteolysis involved in cellular protein catabolic process	-3.2	2.1	3.8	-1.2		GO Biological Processes	GO:0099519	dense core granule cytoskeletal transport	-3.9	13	6.8	-1.8
GO Biological Processes	GO:0016093	polyprenol metabolic process	-3.2	8.8	5.4	-1.2		GO Biological Processes	GO:1902903	regulation of supramolecular fiber organization	-3.9	2.2	4.3	-1.8
GO Biological Processes	GO:0048280	vesicle fusion with Golgi apparatus	-3.2	8.8	5.4	-1.2		GO Biological Processes	GO:0030522	intracellular receptor signaling pathway	-3.9	2.7	4.5	-1.8
GO Biological Processes	GO:0018126	protein hydroxylation	-3.2	4.6	4.6	-1.2		GO Biological Processes	GO:0044057	regulation of system process	-3.9	1.9	4.1	-1.8
GO Biological Processes	GO:0051084	'de novo' posttranslational protein folding	-3.2	4	4.4	-1.2		GO Biological Processes	GO:1901292	nucleoside phosphate catabolic process	-3.8	3	4.6	-1.8
GO Biological Processes	GO:1901293	nucleoside phosphate biosynthetic process	-3.2	1.9	3.7	-1.2		GO Biological Processes	GO:0009145	purine nucleoside triphosphate biosynthetic process	-3.8	3	4.6	-1.8
Reactome Gene Sets	R-MMU-382551	Transport of small molecules	-3.2	1.6	3.5	-1.1		KEGG Pathway	mmu00310	Lysine degradation	-3.8	4.5	5.1	-1.8
Reactome Gene Sets	R-MMU-8873719	RAB geranylgeranylation	-3.2	3.1	4.1	-1.1		GO Biological Processes	GO:0072524	pyridine-containing compound metabolic process	-3.8	2.9	4.5	-1.8
GO Biological Processes	GO:0051656	establishment of organelle localization	-3.2	1.7	3.5	-1.1		GO Biological Processes	GO:0003383	apical constriction	-3.8	22	8	-1.8
GO Biological Processes	GO:0009060	aerobic respiration	-3.2	2.9	4	-1.1		GO Biological Processes	GO:2000793	cell proliferation involved in heart valve development	-3.8	22	8	-1.8
Reactome Gene Sets	R-MMU-381426	Regulation of Insulin-like Growth Factor (IGF) transport and uptake by Insulin-like Growth Factor Bi	-3.2	2.3	3.8	-1.1		GO Biological Processes	GO:0045596	negative regulation of cell differentiation	-3.8	1.8	4	-1.8
Reactome Gene Sets	R-MMU-432722	Golgi Associated Vesicle Biogenesis	-3.2	3.3	4.2	-1.1		GO Biological Processes	GO:0001941	postsynaptic membrane organization	-3.8	5.1	5.2	-1.8
GO Biological Processes	GO:0006561	proline biosynthetic process	-3.2	13	6	-1.1		GO Biological Processes	GO:0040013	negative regulation of locomotion	-3.8	2.2	4.2	-1.8
GO Biological Processes	GO:0036507	protein demannosylation	-3.2	13	6	-1.1		GO Biological Processes	GO:0009201	ribonucleoside triphosphate biosynthetic process	-3.8	3	4.5	-1.8
KEGG Pathway	mmu_M00015	Proline biosynthesis, glutamate => proline	-3.2	13	6	-1.1		GO Biological Processes	GO:0007179	transforming growth factor beta receptor signaling pathway	-3.8	2.9	4.5	-1.8
KEGG Pathway	M00015	Proline biosynthesis, glutamate => proline	-3.2	13	6	-1.1		KEGG Pathway	mmu04530	Tight junction	-3.8	2.9	4.5	-1.8
GO Biological Processes	GO:0036508	protein alpha-1,2-demannosylation	-3.2	13	6	-1.1		GO Biological Processes	GO:0001505	regulation of neurotransmitter levels	-3.8	2.2	4.2	-1.8
GO Biological Processes	GO:1904382	mannose trimming involved in glycoprotein ERAD pathway	-3.2	13	6	-1.1		GO Biological Processes	GO:0051017	actin filament bundle assembly	-3.7	2.8	4.5	-1.7
GO Biological Processes	GO:0035977	protein deglycosylation involved in glycoprotein catabolic process	-3.2	13	6	-1.1		Reactome Gene Sets	R-MMU-380972	Energy dependent regulation of mTOR by LKB1-AMPK	-3.7	6.9	5.6	-1.7
GO Biological Processes	GO:0006753	nucleoside phosphate metabolic process	-3.1	1.6	3.5	-1.1		GO Biological Processes	GO:0090090	negative regulation of canonical Wnt signaling pathway	-3.7	3.3	4.6	-1.7
GO Biological Processes	GO:0042176	regulation of protein catabolic process	-3.1	1.7	3.6	-1.1		GO Biological Processes	GO:0051271	negative regulation of cellular component movement	-3.7	2.3	4.2	-1.7
GO Biological Processes	GO:0090110	cargo loading into COPII-coated vesicle	-3.1	6.3	4.9	-1.1		GO Biological Processes	GO:2001170	negative regulation of ATP biosynthetic process	-3.7	8.8	6	-1.7
GO Biological Processes	GO:1904294	positive regulation of ERAD pathway	-3.1	6.3	4.9	-1.1		GO Biological Processes	GO:0051668	localization within membrane	-3.7	2.7	4.4	-1.7
GO Biological Processes	GO:0006458	'de novo' protein folding	-3.1	3.9	4.3	-1.1		GO Biological Processes	GO:0031400	negative regulation of protein modification process	-3.7	1.9	4	-1.7
GO Biological Processes	GO:0051650	establishment of vesicle localization	-3.1	1.9	3.6	-1.1		GO Biological Processes	GO:0046777	protein autophosphorylation	-3.7	2.5	4.3	-1.7
GO Biological Processes	GO:0006575	cellular modified amino acid metabolic process	-3.1	2.2	3.7	-1.1		GO Biological Processes	GO:0030808	regulation of nucleotide biosynthetic process	-3.7	4	4.8	-1.7
GO Biological Processes	GO:0032386	regulation of intracellular transport	-3.1	1.7	3.5	-1.1		GO Biological Processes	GO:0051193	regulation of cofactor metabolic process	-3.7	4	4.8	-1.7
Reactome Gene Sets	R-MMU-425410	Metal ion SLC transporters	-3.1	5	4.5	-1.1		GO Biological Processes	GO:1900371	regulation of purine nucleotide biosynthetic process	-3.7	4	4.8	-1.7
GO Biological Processes	GO:0009117	nucleotide metabolic process	-3.1	1.6	3.4	-1.1		GO Biological Processes	GO:0009166	nucleotide catabolic process	-3.7	3.1	4.5	-1.7
GO Biological Processes	GO:1903362	regulation of cellular protein catabolic process	-3.1	2	3.6	-1.1		GO Biological Processes	GO:1903829	positive regulation of cellular protein localization	-3.7	2.3	4.2	-1.7
Reactome Gene Sets	R-MMU-6814122	Cooperation of PDCL (PhLP1) and TRiC/CCT in G-protein beta folding	-3	3.8	4.2	-1.1		GO Biological Processes	GO:0071514	genetic imprinting	-3.7	5.6	5.3	-1.7
GO Biological Processes	GO:0072350	tricarboxylic acid metabolic process	-3	3.8	4.2	-1.1		GO Biological Processes	GO:0010508	positive regulation of autophagy	-3.7	3.2	4.6	-1.7
GO Biological Processes	GO:0042982	amyloid precursor protein metabolic process	-3	3.2	4	-1.1		KEGG Pathway	mmu04213	Longevity regulating pathway - multiple species	-3.7	4.3	4.9	-1.7
Reactome Gene Sets	R-MMU-1236974	ER-Phagosome pathway	-3	4.3	4.3	-1		GO Biological Processes	GO:0071407	cellular response to organic cyclic compound	-3.7	2	4	-1.7
Reactome Gene Sets	R-MMU-141444	Amplification of signal from unattached kinetochores via a MAD2 inhibitory signal	-3	2.6	3.8	-1		GO Biological Processes	GO:0006754	ATP biosynthetic process	-3.7	3	4.5	-1.7
Reactome Gene Sets	R-MMU-141424	Amplification of signal from the kinetochores	-3	2.6	3.8	-1		GO Biological Processes	GO:0003158	endothelium development	-3.7	3.2	4.5	-1.7
GO Biological Processes	GO:0019693	ribose phosphate metabolic process	-3	1.7	3.4	-1		GO Biological Processes	GO:0007612	learning	-3.7	2.8	4.4	-1.7
GO Biological Processes	GO:0006560	proline metabolic process	-3	7.8	5	-1		GO Biological Processes	GO:0061572	actin filament bundle organization	-3.7	2.8	4.4	-1.7
Reactome Gene Sets	R-MMU-901042	Calnexin/calreticulin cycle	-3	5.9	4.6	-1		GO Biological Processes	GO:1901950	dense core granule transport	-3.6	12	6.4	-1.7
KEGG Pathway	mmu00620	Pyruvate metabolism	-3	3.7	4.1	-1		GO Biological Processes	GO:0032253	dense core granule localization	-3.6	12	6.4	-1.7
GO Biological Processes	GO:0072595	maintenance of protein localization in organelle	-3	3.7	4.1	-1		Reactome Gene Sets	R-MMU-186763	Downstream signal transduction	-3.6	6.6	5.4	-1.7
Reactome Gene Sets	R-MMU-391251	Protein folding	-3	3.7	4.1	-1		GO Biological Processes	GO:0016577	histone demethylation	-3.6	6.6	5.4	-1.7
Reactome Gene Sets	R-MMU-390466	Chaperonin-mediated protein folding	-3	3.7	4.1	-1		GO Biological Processes	GO:0070076	histone lysine demethylation	-3.6	6.6	5.4	-1.7
GO Biological Processes	GO:0097193	intrinsic apoptotic signaling pathway	-2.9	1.8	3.4	-0.96		GO Biological Processes	GO:1903578	regulation of ATP metabolic process	-3.6	3.6	4.6	-1.7
GO Biological Processes	GO:0007029	endoplasmic reticulum organization	-2.9	3.1	3.9	-0.95		GO Biological Processes	GO:0034404	nucleobase-containing small molecule biosynthetic process	-3.6	2.8	4.3	-1.7
GO Biological Processes	GO:0044282	small molecule catabolic process	-2.8	1.8	3.4	-0.9		GO Biological Processes	GO:0008286	insulin receptor signaling pathway	-3.6	3.2	4.5	-1.7
Reactome Gene Sets	R-MMU-69273	Cyclin A/B1/B2 associated events during G2/M transition	-2.8	4.6	4.2	-0.9		Reactome Gene Sets	R-MMU-165159	mTOR signalling	-3.6	5.5	5.2	-1.7
GO Biological Processes	GO:0009260	ribonucleotide biosynthetic process	-2.8	1.9	3.4	-0.89		GO Biological Processes	GO:2000463	positive regulation of excitatory postsynaptic potential	-3.6	5.5	5.2	-1.7
Reactome Gene Sets	R-MMU-71291	Metabolism of amino acids and derivatives	-2.8	2	3.4	-0.86		GO Biological Processes	GO:0007015	actin filament organization	-3.6	2.1	4.1	-1.7
GO Biological Processes	GO:0033157	regulation of intracellular protein transport	-2.8	2	3.4	-0.86		GO Biological Processes	GO:1904262	negative regulation of TORC1 signaling	-3.6	8.3	5.8	-1.7
Reactome Gene Sets	R-MMU-69618	Mitotic Spindle Checkpoint	-2.8	2.4	3.5	-0.85		GO Biological Processes	GO:1900372	negative regulation of purine nucleotide biosynthetic process	-3.6	8.3	5.8	-1.7
Reactome Gene Sets	R-MMU-5663220	RHO GTPases Activate Formins	-2.8	2.2	3.5	-0.85		GO Biological Processes	GO:0030809	negative regulation of nucleotide biosynthetic process	-3.6	8.3	5.8	-1.7
GO Biological Processes	GO:0097466	ubiquitin-dependent glycoprotein ERAD pathway	-2.8	11	5.3	-0.85		GO Biological Processes	GO:1990845	adaptive thermogenesis	-3.6	2.9	4.4	-1.7
Reactome Gene Sets	R-MMU-1169092	Activation of RAS in B cells	-2.8	11	5.3	-0.85		GO Biological Processes	GO:0071383	cellular response to steroid hormone stimulus	-3.6	2.9	4.4	-1.7
CORUM	CORUM:674	Gamma-secretase complex (Aph1a, Ncstn, Psen1, Psenen, Tmp21)	-2.8	11	5.3	-0.85		GO Biological Processes	GO:0050773	regulation of dendrite development	-3.6	2.6	4.3	-1.7
GO Biological Processes	GO:0019348	dolichol metabolic process	-2.8	11	5.3	-0.85		GO Biological Processes	GO:0044262	cellular carbohydrate metabolic process	-3.6	2.3	4.1	-1.7
GO Biological Processes	GO:0007269	neurotransmitter secretion	-2.8	2	3.4	-0.85		GO Biological Processes	GO:0030511	positive regulation of transforming growth factor beta receptor signaling pathway	-3.5	6.4	5.3	-1.6
GO Biological Processes	GO:0045333	cellular respiration	-2.8	2.1	3.4	-0.84		GO Biological Processes	GO:1903846	positive regulation of cellular response to transforming growth factor beta stimulus	-3.5	6.4	5.3	-1.6
GO Biological Processes	GO:0140014	mitotic nuclear division	-2.8	1.8	3.3	-0.84		GO Biological Processes	GO:0071559	response to transforming growth factor beta	-3.5	2.5	4.2	-1.6
Reactome Gene Sets	R-MMU-1280218	Adaptive Immune System	-2.8	1.5	3.2	-0.83		KEGG Pathway	mmu04910	Insulin signaling pathway	-3.5	3	4.3	-1.6
GO Biological Processes	GO:1901976	regulation of cell cycle checkpoint	-2.7	3.9	4	-0.83		GO Biological Processes	GO:0006338	chromatin remodeling	-3.5	3	4.3	-1.6
GO Biological Processes	GO:0099643	signal release from synapse	-2.7	2	3.4	-0.83		KEGG Pathway	mmu04931	Insulin resistance	-3.5	3.3	4.4	-1.6
GO Biological Processes	GO:0009165	nucleotide biosynthetic process	-2.7	1.8	3.3	-0.83		GO Biological Processes	GO:0010721	negative regulation of cell development	-3.5	2.1	4	-1.6
KEGG Pathway	mmu04612	Antigen processing and presentation	-2.7	2.5	3.6	-0.83		GO Biological Processes	GO:0006733	oxidoreduction coenzyme metabolic process	-3.5	2.7	4.2	-1.6
GO Biological Processes	GO:0071616	acyl-CoA biosynthetic process	-2.7	4.4	4.1	-0.83		GO Biological Processes	GO:0050769	positive regulation of neurogenesis	-3.5	1.8	3.9	-1.6
GO Biological Processes	GO:0035384	thioester biosynthetic process	-2.7	4.4	4.1	-0.83		GO Biological Processes	GO:0090100	positive regulation of transmembrane receptor protein serine/threonine kinase signaling pathway	-3.5	3.2	4.4	-1.6
KEGG Pathway	M00009	Citrate cycle (TCA cycle, Krebs cycle)	-2.7	4.4	4.1	-0.83		GO Biological Processes	GO:0009142	nucleoside triphosphate biosynthetic process	-3.5	2.8	4.2	-1.6
KEGG Pathway	mmu_M00009	Citrate cycle (TCA cycle, Krebs cycle)	-2.7	4.4	4.1	-0.83		GO Biological Processes	GO:0034101	erythrocyte homeostasis	-3.5	2.9	4.3	-1.6
GO Biological Processes	GO:0090150	establishment of protein localization to membrane	-2.7	1.9	3.3	-0.83		GO Biological Processes	GO:0010975	regulation of neuron projection development	-3.5	1.8	3.8	-1.6
GO Biological Processes	GO:0010559	regulation of glycoprotein biosynthetic process	-2.7	3.4	3.8	-0.83		GO Biological Processes	GO:0048813	dendrite morphogenesis	-3.5	2.7	4.2	-1.6
Reactome Gene Sets	R-MMU-68886	M Phase	-2.7	1.7	3.2	-0.81		GO Biological Processes	GO:0002155	regulation of thyroid hormone mediated signaling pathway	-3.4	18	7	-1.5
GO Biological Processes	GO:0006906	vesicle fusion	-2.7	2.5	3.5	-0.8		GO Biological Processes	GO:0001659	temperature homeostasis	-3.4	2.7	4.2	-1.5
GO Biological Processes	GO:0006085	acetyl-CoA biosynthetic process	-2.7	5.2	4.2	-0.8		GO Biological Processes	GO:0099072	regulation of postsynaptic membrane neurotransmitter receptor levels	-3.4	3.4	4.4	-1.5
GO Biological Processes	GO:0035459	cargo loading into vesicle	-2.7	5.2	4.2	-0.8		Reactome Gene Sets	R-MMU-9006936	Signaling by TGF-beta family members	-3.4	3.7	4.5	-1.5
GO Biological Processes	GO:0051648	vesicle localization	-2.7	1.8	3.2	-0.78		GO Biological Processes	GO:0051962	positive regulation of nervous system development	-3.4	1.8	3.8	-1.5
GO Biological Processes	GO:1905898	positive regulation of response to endoplasmic reticulum stress	-2.7	3.7	3.9	-0.78		GO Biological Processes	GO:0032970	regulation of actin filament-based process	-3.4	2	3.9	-1.5
GO Biological Processes	GO:0046390	ribose phosphate biosynthetic process	-2.7	1.9	3.3	-0.77		GO Biological Processes	GO:0048545	response to steroid hormone	-3.4	2.5	4.1	-1.5
Reactome Gene Sets	R-MMU-2467813	Separation of Sister Chromatids	-2.6	2.2	3.4	-0.76		GO Biological Processes	GO:0016525	negative regulation of angiogenesis	-3.4	3.2	4.3	-1.5
GO Biological Processes	GO:0002478	antigen processing and presentation of exogenous peptide antigen	-2.6	4.2	4	-0.76		Reactome Gene Sets	R-MMU-422475	Axon guidance	-3.4	2.3	4	-1.5
GO Biological Processes	GO:0051443	positive regulation of ubiquitin-protein transferase activity	-2.6	4.2	4	-0.76		GO Biological Processes	GO:1903827	regulation of cellular protein localization	-3.4	1.9	3.8	-1.5
GO Biological Processes	GO:0051788	response to misfolded protein	-2.6	4.2	4	-0.76		GO Biological Processes	GO:0043502	regulation of muscle adaptation	-3.4	3.4	4.4	-1.5
GO Biological Processes	GO:0090114	COPII-coated vesicle budding	-2.6	4.2	4	-0.76		GO Biological Processes	GO:0031646	positive regulation of neurological system process	-3.4	3.6	4.4	-1.5
GO Biological Processes	GO:0016054	organic acid catabolic process	-2.6	1.9	3.3	-0.76		GO Biological Processes	GO:0006482	protein demethylation	-3.4	6	5.1	-1.5
GO Biological Processes	GO:0046395	carboxylic acid catabolic process	-2.6	1.9	3.3	-0.76		Reactome Gene Sets	R-MMU-352230	Amino acid transport across the plasma membrane	-3.4	6	5.1	-1.5
GO Biological Processes	GO:0061077	chaperone-mediated protein folding	-2.6	3.1	3.6	-0.75		GO Biological Processes	GO:0035640	exploration behavior	-3.4	6	5.1	-1.5
GO Biological Processes	GO:1901607	alpha-amino acid biosynthetic process	-2.6	2.8	3.6	-0.75		GO Biological Processes	GO:0051569	regulation of histone H3-K4 methylation	-3.4	6	5.1	-1.5
GO Biological Processes	GO:0033539	fatty acid beta-oxidation using acyl-CoA dehydrogenase	-2.6	6.4	4.4	-0.74		GO Biological Processes	GO:0008214	protein dealkylation	-3.4	6	5.1	-1.5
GO Biological Processes	GO:0034599	cellular response to oxidative stress	-2.6	1.8	3.2	-0.71		Reactome Gene Sets	R-MMU-6794362	Protein-protein interactions at synapses	-3.4	3.9	4.5	-1.5
KEGG Pathway	mmu04014	Ras signaling pathway	-2.6	1.9	3.2	-0.71		GO Biological Processes	GO:0043113	receptor clustering	-3.4	3.9	4.5	-1.5
Reactome Gene Sets	R-MMU-68877	Mitotic Prometaphase	-2.6	1.9	3.2	-0.71		Reactome Gene Sets	R-MMU-5628897	TP53 Regulates Metabolic Genes	-3.3	5	4.8	-1.5
GO Biological Processes	GO:0006979	response to oxidative stress	-2.6	1.6	3.1	-0.7		GO Biological Processes	GO:0030866	cortical actin cytoskeleton organization	-3.3	5	4.8	-1.5
GO Biological Processes	GO:0006732	coenzyme metabolic process	-2.6	1.7	3.1	-0.7		GO Biological Processes	GO:0030111	regulation of Wnt signaling pathway	-3.3	2.2	3.9	-1.5
GO Biological Processes	GO:0006836	neurotransmitter transport	-2.5	1.7	3.1	-0.69		GO Biological Processes	GO:0005975	carbohydrate metabolic process	-3.3	1.8	3.8	-1.5
Reactome Gene Sets	R-MMU-68882	Mitotic Anaphase	-2.5	2.1	3.3	-0.69		GO Biological Processes	GO:0045666	positive regulation of neuron differentiation	-3.3	1.9	3.8	-1.5
GO Biological Processes	GO:0009259	ribonucleotide metabolic process	-2.5	1.6	3.1	-0.69		KEGG Pathway	mmu04923	Regulation of lipolysis in adipocytes	-3.3	4.3	4.6	-1.5
Reactome Gene Sets	R-MMU-2555396	Mitotic Metaphase and Anaphase	-2.5	2.1	3.2	-0.67		GO Biological Processes	GO:1903539	protein localization to postsynaptic membrane	-3.3	4.3	4.6	-1.5
GO Biological Processes	GO:0034030	ribonucleoside bisphosphate biosynthetic process	-2.5	3.5	3.7	-0.67		GO Biological Processes	GO:0008285	negative regulation of cell proliferation	-3.3	1.7	3.7	-1.5
GO Biological Processes	GO:0033866	nucleoside bisphosphate biosynthetic process	-2.5	3.5	3.7	-0.67		GO Biological Processes	GO:0010720	positive regulation of cell development	-3.3	1.8	3.7	-1.5
GO Biological Processes	GO:0034033	purine nucleoside bisphosphate biosynthetic process	-2.5	3.5	3.7	-0.67		GO Biological Processes	GO:0042176	regulation of protein catabolic process	-3.3	2	3.8	-1.5
KEGG Pathway	mmu03030	DNA replication	-2.5	3.5	3.7	-0.67		GO Biological Processes	GO:0032259	methylation	-3.3	2.1	3.8	-1.5
GO Biological Processes	GO:0031647	regulation of protein stability	-2.5	1.8	3.1	-0.67		GO Biological Processes	GO:0048598	embryonic morphogenesis	-3.3	1.8	3.7	-1.5
GO Biological Processes	GO:0010815	bradykinin catabolic process	-2.5	8.8	4.7	-0.67		GO Biological Processes	GO:0097435	supramolecular fiber organization	-3.3	1.7	3.7	-1.5
GO Biological Processes	GO:0010757	negative regulation of plasminogen activation	-2.5	8.8	4.7	-0.67		GO Biological Processes	GO:0044728	DNA methylation or demethylation	-3.3	3.5	4.4	-1.5
KEGG Pathway	mmu_M00073	N-glycan precursor trimming	-2.5	8.8	4.7	-0.67		GO Biological Processes	GO:0044030	regulation of DNA methylation	-3.3	5.8	4.9	-1.5
GO Biological Processes	GO:0022417	protein maturation by protein folding	-2.5	8.8	4.7	-0.67		GO Biological Processes	GO:0040018	positive regulation of multicellular organism growth	-3.3	4.8	4.7	-1.4
KEGG Pathway	M00073	N-glycan precursor trimming	-2.5	8.8	4.7	-0.67		GO Biological Processes	GO:2000181	negative regulation of blood vessel morphogenesis	-3.3	3.1	4.2	-1.4
CORUM	CORUM:122	MCM complex	-2.5	8.8	4.7	-0.67		KEGG Pathway	mmu04933	AGE-RAGE signaling pathway in diabetic complications	-3.3	3.3	4.2	-1.4
GO Biological Processes	GO:1904587	response to glycoprotein	-2.5	8.8	4.7	-0.67		GO Biological Processes	GO:2001224	positive regulation of neuron migration	-3.3	7.1	5.2	-1.4
GO Biological Processes	GO:0070072	vacuolar proton-transporting V-type ATPase complex assembly	-2.5	8.8	4.7	-0.67		KEGG Pathway	mmu04012	ErbB signaling pathway	-3.3	3.5	4.3	-1.4
GO Biological Processes	GO:0090261	positive regulation of inclusion body assembly	-2.5	8.8	4.7	-0.67		GO Biological Processes	GO:0001822	kidney development	-3.2	2.2	3.8	-1.4
Reactome Gene Sets	R-MMU-446199	Synthesis of Dolichyl-phosphate	-2.5	8.8	4.7	-0.67		GO Biological Processes	GO:0046883	regulation of hormone secretion	-3.2	2.2	3.8	-1.4
GO Biological Processes	GO:0000070	mitotic sister chromatid segregation	-2.5	2.1	3.2	-0.65		KEGG Pathway	mmu04920	Adipocytokine signaling pathway	-3.2	3.8	4.4	-1.4
GO Biological Processes	GO:0008652	cellular amino acid biosynthetic process	-2.5	2.7	3.4	-0.64		GO Biological Processes	GO:0044089	positive regulation of cellular component biogenesis	-3.2	1.8	3.7	-1.4
Reactome Gene Sets	R-MMU-4086398	Ca2+ pathway	-2.5	3.1	3.5	-0.64		GO Biological Processes	GO:0071560	cellular response to transforming growth factor beta stimulus	-3.2	2.5	3.9	-1.4
GO Biological Processes	GO:0006517	protein deglycosylation	-2.5	5.9	4.1	-0.64		GO Biological Processes	GO:0046879	hormone secretion	-3.2	2	3.7	-1.4
GO Biological Processes	GO:0006086	acetyl-CoA biosynthetic process from pyruvate	-2.5	5.9	4.1	-0.64		KEGG Pathway	mmu04520	Adherens junction	-3.2	3.7	4.3	-1.4
GO Biological Processes	GO:0042984	regulation of amyloid precursor protein biosynthetic process	-2.5	5.9	4.1	-0.64		GO Biological Processes	GO:0032956	regulation of actin cytoskeleton organization	-3.2	2.1	3.7	-1.4
GO Biological Processes	GO:0042983	amyloid precursor protein biosynthetic process	-2.5	5.9	4.1	-0.64		GO Biological Processes	GO:0040008	regulation of growth	-3.2	1.7	3.6	-1.3
GO Biological Processes	GO:0019471	4-hydroxyproline metabolic process	-2.5	5.9	4.1	-0.64		GO Biological Processes	GO:1905477	positive regulation of protein localization to membrane	-3.2	3.2	4.1	-1.3
GO Biological Processes	GO:0090174	organelle membrane fusion	-2.5	2.3	3.3	-0.64		GO Biological Processes	GO:1900542	regulation of purine nucleotide metabolic process	-3.2	3.2	4.1	-1.3
GO Biological Processes	GO:1903364	positive regulation of cellular protein catabolic process	-2.5	2.1	3.2	-0.64		GO Biological Processes	GO:1901626	regulation of postsynaptic membrane organization	-3.2	6.8	5	-1.3
GO Biological Processes	GO:1901606	alpha-amino acid catabolic process	-2.4	2.6	3.3	-0.63		Reactome Gene Sets	R-MMU-3700989	Transcriptional Regulation by TP53	-3.2	2.4	3.8	-1.3
Reactome Gene Sets	R-MMU-428157	Sphingolipid metabolism	-2.4	2.4	3.3	-0.63		GO Biological Processes	GO:1990049	retrograde neuronal dense core vesicle transport	-3.2	15	6.3	-1.3
GO Biological Processes	GO:0006903	vesicle targeting	-2.4	3.4	3.6	-0.63		GO Biological Processes	GO:0061038	uterus morphogenesis	-3.2	15	6.3	-1.3
GO Biological Processes	GO:0017144	drug metabolic process	-2.4	1.4	2.9	-0.63		GO Biological Processes	GO:0046487	glyoxylate metabolic process	-3.2	15	6.3	-1.3
GO Biological Processes	GO:0009152	purine ribonucleotide biosynthetic process	-2.4	1.9	3.1	-0.61		Reactome Gene Sets	R-MMU-163680	AMPK inhibits chREBP transcriptional activation activity	-3.2	15	6.3	-1.3
GO Biological Processes	GO:0051438	regulation of ubiquitin-protein transferase activity	-2.4	3.1	3.4	-0.6		Reactome Gene Sets	R-MMU-1502540	Signaling by Activin	-3.1	9.2	5.5	-1.3
GO Biological Processes	GO:0071277	cellular response to calcium ion	-2.4	2.5	3.3	-0.6		GO Biological Processes	GO:0002087	regulation of respiratory gaseous exchange by neurological system process	-3.1	9.2	5.5	-1.3
GO Biological Processes	GO:1903828	negative regulation of cellular protein localization	-2.4	2.2	3.2	-0.59		GO Biological Processes	GO:0045820	negative regulation of glycolytic process	-3.1	9.2	5.5	-1.3
GO Biological Processes	GO:0015980	energy derivation by oxidation of organic compounds	-2.4	1.8	3	-0.59		Reactome Gene Sets	R-MMU-6794361	Neurexins and neuroligins	-3.1	5.4	4.7	-1.3
Reactome Gene Sets	R-MMU-202040	G-protein activation	-2.4	3.8	3.6	-0.58		GO Biological Processes	GO:0014741	negative regulation of muscle hypertrophy	-3.1	5.4	4.7	-1.3
GO Biological Processes	GO:0048002	antigen processing and presentation of peptide antigen	-2.4	2.6	3.3	-0.57		KEGG Pathway	mmu04727	GABAergic synapse	-3.1	3.4	4.2	-1.3
GO Biological Processes	GO:0048199	vesicle targeting, to, from or within Golgi	-2.4	4.4	3.7	-0.56		GO Biological Processes	GO:0032007	negative regulation of TOR signaling	-3.1	4.5	4.5	-1.3
GO Biological Processes	GO:0051383	kinetochore organization	-2.4	4.4	3.7	-0.56		GO Biological Processes	GO:1990928	response to amino acid starvation	-3.1	4.5	4.5	-1.3
GO Biological Processes	GO:0007033	vacuole organization	-2.3	2	3	-0.55		GO Biological Processes	GO:0060996	dendritic spine development	-3.1	2.9	4	-1.3
GO Biological Processes	GO:0043112	receptor metabolic process	-2.3	1.9	3	-0.55		GO Biological Processes	GO:0000186	activation of MAPKK activity	-3.1	5.3	4.6	-1.3
GO Biological Processes	GO:1901800	positive regulation of proteasomal protein catabolic process	-2.3	2.3	3.1	-0.55		GO Biological Processes	GO:0046847	filopodium assembly	-3.1	4	4.3	-1.3
Reactome Gene Sets	R-MMU-453274	Mitotic G2-G2/M phases	-2.3	2.1	3.1	-0.54		GO Biological Processes	GO:0030041	actin filament polymerization	-3.1	2.6	3.8	-1.3
GO Biological Processes	GO:0061640	cytoskeleton-dependent cytokinesis	-2.3	2.4	3.2	-0.54		GO Biological Processes	GO:0051494	negative regulation of cytoskeleton organization	-3.1	2.7	3.9	-1.3
GO Biological Processes	GO:0009063	cellular amino acid catabolic process	-2.3	2.4	3.2	-0.54		GO Biological Processes	GO:0051188	cofactor biosynthetic process	-3.1	2.3	3.7	-1.3
GO Biological Processes	GO:0006091	generation of precursor metabolites and energy	-2.3	1.6	2.9	-0.54		GO Biological Processes	GO:0009914	hormone transport	-3.1	2	3.6	-1.3
GO Biological Processes	GO:0032482	Rab protein signal transduction	-2.3	2.6	3.2	-0.54		GO Biological Processes	GO:0031669	cellular response to nutrient levels	-3.1	2.5	3.8	-1.3
GO Biological Processes	GO:0006720	isoprenoid metabolic process	-2.3	2.5	3.2	-0.54		GO Biological Processes	GO:0023061	signal release	-3	1.8	3.5	-1.3
GO Biological Processes	GO:0070071	proton-transporting two-sector ATPase complex assembly	-2.3	5.4	3.9	-0.54		GO Biological Processes	GO:0006732	coenzyme metabolic process	-3	2.1	3.6	-1.3
GO Biological Processes	GO:0072425	signal transduction involved in G2 DNA damage checkpoint	-2.3	5.4	3.9	-0.54		GO Biological Processes	GO:0009127	purine nucleoside monophosphate biosynthetic process	-3	2.6	3.9	-1.3
GO Biological Processes	GO:0010755	regulation of plasminogen activation	-2.3	5.4	3.9	-0.54		GO Biological Processes	GO:0009168	purine ribonucleoside monophosphate biosynthetic process	-3	2.6	3.9	-1.3
GO Biological Processes	GO:0006644	phospholipid metabolic process	-2.3	1.6	2.9	-0.53		GO Biological Processes	GO:0120163	negative regulation of cold-induced thermogenesis	-3	4.4	4.4	-1.3
GO Biological Processes	GO:0001919	regulation of receptor recycling	-2.3	3.7	3.5	-0.52		GO Biological Processes	GO:0007611	learning or memory	-3	2.1	3.7	-1.3
GO Biological Processes	GO:0006270	DNA replication initiation	-2.3	3.7	3.5	-0.52		GO Biological Processes	GO:0006006	glucose metabolic process	-3	2.4	3.8	-1.3
Reactome Gene Sets	R-MMU-983705	Signaling by the B Cell Receptor (BCR)	-2.3	2.7	3.2	-0.52		GO Biological Processes	GO:0006140	regulation of nucleotide metabolic process	-3	3.1	4	-1.2
GO Biological Processes	GO:1903052	positive regulation of proteolysis involved in cellular protein catabolic process	-2.3	2.2	3.1	-0.52		GO Biological Processes	GO:1900402	regulation of carbohydrate metabolic process by regulation of transcription from RNA polymerase II p	-3	8.5	5.2	-1.2
Reactome Gene Sets	R-MMU-174143	APC/C-mediated degradation of cell cycle proteins	-2.3	2.4	3.1	-0.51		GO Biological Processes	GO:0030812	negative regulation of nucleotide catabolic process	-3	8.5	5.2	-1.2
Reactome Gene Sets	R-MMU-453276	Regulation of mitotic cell cycle	-2.3	2.4	3.1	-0.51		GO Biological Processes	GO:0051198	negative regulation of coenzyme metabolic process	-3	8.5	5.2	-1.2
GO Biological Processes	GO:0019388	galactose catabolic process	-2.3	7.6	4.3	-0.51		GO Biological Processes	GO:1902116	negative regulation of organelle assembly	-3	5.1	4.5	-1.2
GO Biological Processes	GO:1903069	regulation of ER-associated ubiquitin-dependent protein catabolic process	-2.3	7.6	4.3	-0.51		GO Biological Processes	GO:0045686	negative regulation of glial cell differentiation	-3	5.1	4.5	-1.2
GO Biological Processes	GO:1903288	positive regulation of potassium ion import	-2.3	7.6	4.3	-0.51		GO Biological Processes	GO:1900006	positive regulation of dendrite development	-3	3	3.9	-1.2
Reactome Gene Sets	R-MMU-5658442	Regulation of RAS by GAPs	-2.3	4.2	3.6	-0.5		GO Biological Processes	GO:0060998	regulation of dendritic spine development	-3	3.2	4	-1.2
GO Biological Processes	GO:0006399	tRNA metabolic process	-2.3	1.9	3	-0.5		GO Biological Processes	GO:0061564	axon development	-3	1.8	3.5	-1.2
GO Biological Processes	GO:0044283	small molecule biosynthetic process	-2.2	1.4	2.7	-0.49		GO Biological Processes	GO:0070988	demethylation	-3	3.8	4.2	-1.2
KEGG Pathway	mmu00480	Glutathione metabolism	-2.2	2.7	3.2	-0.49		GO Biological Processes	GO:0051129	negative regulation of cellular component organization	-3	1.7	3.4	-1.2
GO Biological Processes	GO:0036473	cell death in response to oxidative stress	-2.2	2.3	3.1	-0.49		GO Biological Processes	GO:0009743	response to carbohydrate	-3	2.4	3.7	-1.2
GO Biological Processes	GO:0001881	receptor recycling	-2.2	3.2	3.3	-0.49		GO Biological Processes	GO:0050768	negative regulation of neurogenesis	-3	2	3.6	-1.2
GO Biological Processes	GO:0090087	regulation of peptide transport	-2.2	1.4	2.7	-0.49		GO Biological Processes	GO:0110053	regulation of actin filament organization	-3	2.2	3.6	-1.2
GO Biological Processes	GO:0009150	purine ribonucleotide metabolic process	-2.2	1.6	2.8	-0.48		GO Biological Processes	GO:0034330	cell junction organization	-2.9	2.2	3.6	-1.2
GO Biological Processes	GO:0051085	chaperone cofactor-dependent protein refolding	-2.2	3.5	3.4	-0.47		GO Biological Processes	GO:0009156	ribonucleoside monophosphate biosynthetic process	-2.9	2.6	3.7	-1.2
GO Biological Processes	GO:0009225	nucleotide-sugar metabolic process	-2.2	3.5	3.4	-0.47		Reactome Gene Sets	R-MMU-193648	NRAGE signals death through JNK	-2.9	4.3	4.2	-1.2
GO Biological Processes	GO:0008608	attachment of spindle microtubules to kinetochore	-2.2	3.5	3.4	-0.47		Reactome Gene Sets	R-MMU-3214841	PKMTs methylate histone lysines	-2.9	3.8	4.1	-1.2
GO Biological Processes	GO:0031396	regulation of protein ubiquitination	-2.2	1.8	2.9	-0.47		GO Biological Processes	GO:0060999	positive regulation of dendritic spine development	-2.9	3.8	4.1	-1.2
Reactome Gene Sets	R-MMU-425407	SLC-mediated transmembrane transport	-2.2	1.7	2.8	-0.46		GO Biological Processes	GO:1904717	regulation of AMPA glutamate receptor clustering	-2.9	13	5.8	-1.2
GO Biological Processes	GO:1903322	positive regulation of protein modification by small protein conjugation or removal	-2.2	2.1	2.9	-0.45		GO Biological Processes	GO:2000049	positive regulation of cell-cell adhesion mediated by cadherin	-2.9	13	5.8	-1.2
GO Biological Processes	GO:1901136	carbohydrate derivative catabolic process	-2.2	2.1	3	-0.45		GO Biological Processes	GO:0002154	thyroid hormone mediated signaling pathway	-2.9	13	5.8	-1.2
KEGG Pathway	M00011	Citrate cycle, second carbon oxidation, 2-oxoglutarate => oxaloacetate	-2.2	5	3.7	-0.45		GO Biological Processes	GO:0106104	regulation of glutamate receptor clustering	-2.9	13	5.8	-1.2
KEGG Pathway	mmu_M00011	Citrate cycle, second carbon oxidation, 2-oxoglutarate => oxaloacetate	-2.2	5	3.7	-0.45		Reactome Gene Sets	R-MMU-426496	Post-transcriptional silencing by small RNAs	-2.9	13	5.8	-1.2
GO Biological Processes	GO:0009226	nucleotide-sugar biosynthetic process	-2.2	5	3.7	-0.45		GO Biological Processes	GO:0032776	DNA methylation on cytosine	-2.9	13	5.8	-1.2
GO Biological Processes	GO:0030007	cellular potassium ion homeostasis	-2.2	5	3.7	-0.45		GO Biological Processes	GO:0038026	reelin-mediated signaling pathway	-2.9	13	5.8	-1.2
GO Biological Processes	GO:0072522	purine-containing compound biosynthetic process	-2.2	1.7	2.8	-0.44		GO Biological Processes	GO:0003330	regulation of extracellular matrix constituent secretion	-2.9	13	5.8	-1.2
GO Biological Processes	GO:0071459	protein localization to chromosome, centromeric region	-2.2	4	3.5	-0.44		GO Biological Processes	GO:0009749	response to glucose	-2.9	2.5	3.7	-1.2
GO Biological Processes	GO:0070841	inclusion body assembly	-2.2	4	3.5	-0.44		GO Biological Processes	GO:0030099	myeloid cell differentiation	-2.9	1.9	3.5	-1.2
GO Biological Processes	GO:0009154	purine ribonucleotide catabolic process	-2.2	4	3.5	-0.44		GO Biological Processes	GO:0006974	cellular response to DNA damage stimulus	-2.9	1.6	3.4	-1.2
GO Biological Processes	GO:0009261	ribonucleotide catabolic process	-2.2	4	3.5	-0.44		GO Biological Processes	GO:0051272	positive regulation of cellular component movement	-2.9	1.7	3.4	-1.2
GO Biological Processes	GO:0072659	protein localization to plasma membrane	-2.2	1.7	2.8	-0.44		GO Biological Processes	GO:1901343	negative regulation of vasculature development	-2.9	2.8	3.8	-1.2
KEGG Pathway	mmu01200	Carbon metabolism	-2.2	2.1	2.9	-0.43		GO Biological Processes	GO:0032515	negative regulation of phosphoprotein phosphatase activity	-2.9	6	4.6	-1.2
KEGG Pathway	mmu04730	Long-term depression	-2.1	2.6	3.1	-0.43		GO Biological Processes	GO:0043401	steroid hormone mediated signaling pathway	-2.9	2.9	3.8	-1.2
GO Biological Processes	GO:0034205	amyloid-beta formation	-2.1	3.4	3.3	-0.43		GO Biological Processes	GO:0007409	axonogenesis	-2.9	1.8	3.4	-1.2
GO Biological Processes	GO:0019884	antigen processing and presentation of exogenous antigen	-2.1	3.4	3.3	-0.43		GO Biological Processes	GO:0010639	negative regulation of organelle organization	-2.9	1.9	3.5	-1.2
Reactome Gene Sets	R-MMU-4085001	Sialic acid metabolism	-2.1	3.4	3.3	-0.43		GO Biological Processes	GO:0030865	cortical cytoskeleton organization	-2.9	4.2	4.2	-1.1
GO Biological Processes	GO:0055075	potassium ion homeostasis	-2.1	3.4	3.3	-0.43		Reactome Gene Sets	R-MMU-8878159	Transcriptional regulation by RUNX3	-2.9	4.8	4.3	-1.1
GO Biological Processes	GO:0035725	sodium ion transmembrane transport	-2.1	2.1	2.9	-0.41		GO Biological Processes	GO:0030855	epithelial cell differentiation	-2.9	1.7	3.3	-1.1
GO Biological Processes	GO:0031398	positive regulation of protein ubiquitination	-2.1	2.1	2.9	-0.41		Reactome Gene Sets	R-MMU-983168	Antigen processing: Ubiquitination & Proteasome degradation	-2.9	2.2	3.6	-1.1
GO Biological Processes	GO:1901799	negative regulation of proteasomal protein catabolic process	-2.1	2.8	3.1	-0.4		GO Biological Processes	GO:0019827	stem cell population maintenance	-2.9	2.5	3.7	-1.1
GO Biological Processes	GO:0042987	amyloid precursor protein catabolic process	-2.1	3	3.2	-0.4		GO Biological Processes	GO:0042133	neurotransmitter metabolic process	-2.9	2.6	3.7	-1.1
Reactome Gene Sets	R-MMU-112314	Neurotransmitter receptors and postsynaptic signal transmission	-2.1	2	2.8	-0.4		GO Biological Processes	GO:0009746	response to hexose	-2.8	2.4	3.6	-1.1
GO Biological Processes	GO:0006790	sulfur compound metabolic process	-2.1	1.7	2.7	-0.4		GO Biological Processes	GO:0007173	epidermal growth factor receptor signaling pathway	-2.8	3.1	3.8	-1.1
KEGG Pathway	mmu04918	Thyroid hormone synthesis	-2.1	2.4	3	-0.39		GO Biological Processes	GO:0001933	negative regulation of protein phosphorylation	-2.8	1.9	3.4	-1.1
GO Biological Processes	GO:0030004	cellular monovalent inorganic cation homeostasis	-2.1	2.2	2.9	-0.39		GO Biological Processes	GO:0007423	sensory organ development	-2.8	1.7	3.3	-1.1
GO Biological Processes	GO:0051186	cofactor metabolic process	-2.1	1.5	2.6	-0.39		KEGG Pathway	mmu04725	Cholinergic synapse	-2.8	2.9	3.8	-1.1
GO Biological Processes	GO:0009158	ribonucleoside monophosphate catabolic process	-2.1	6.6	3.9	-0.39		GO Biological Processes	GO:0090150	establishment of protein localization to membrane	-2.8	2.3	3.6	-1.1
GO Biological Processes	GO:1903286	regulation of potassium ion import	-2.1	6.6	3.9	-0.39		GO Biological Processes	GO:0031668	cellular response to extracellular stimulus	-2.8	2.3	3.6	-1.1
GO Biological Processes	GO:0009169	purine ribonucleoside monophosphate catabolic process	-2.1	6.6	3.9	-0.39		GO Biological Processes	GO:0051235	maintenance of location	-2.8	2	3.5	-1.1
Reactome Gene Sets	R-MMU-171007	p38MAPK events	-2.1	6.6	3.9	-0.39		GO Biological Processes	GO:0019098	reproductive behavior	-2.8	4.1	4.1	-1.1
GO Biological Processes	GO:0000098	sulfur amino acid catabolic process	-2.1	6.6	3.9	-0.39		GO Biological Processes	GO:0034284	response to monosaccharide	-2.8	2.4	3.6	-1.1
KEGG Pathway	mmu00900	Terpenoid backbone biosynthesis	-2.1	3.8	3.3	-0.39		GO Biological Processes	GO:0098609	cell-cell adhesion	-2.8	1.6	3.3	-1.1
GO Biological Processes	GO:0071218	cellular response to misfolded protein	-2.1	3.8	3.3	-0.39		GO Biological Processes	GO:0060065	uterus development	-2.8	5.7	4.5	-1.1
Reactome Gene Sets	R-MMU-163359	Glucagon signaling in metabolic regulation	-2.1	3.3	3.2	-0.39		GO Biological Processes	GO:1903579	negative regulation of ATP metabolic process	-2.8	5.7	4.5	-1.1
GO Biological Processes	GO:0006536	glutamate metabolic process	-2.1	3.3	3.2	-0.39		GO Biological Processes	GO:0060828	regulation of canonical Wnt signaling pathway	-2.8	2.3	3.5	-1.1
Reactome Gene Sets	R-MMU-451326	Activation of kainate receptors upon glutamate binding	-2.1	3.3	3.2	-0.39		GO Biological Processes	GO:0006304	DNA modification	-2.8	3.1	3.8	-1.1
Reactome Gene Sets	R-MMU-70614	Amino acid synthesis and interconversion (transamination)	-2.1	3.3	3.2	-0.39		GO Biological Processes	GO:0048729	tissue morphogenesis	-2.8	1.7	3.3	-1.1
GO Biological Processes	GO:0006084	acetyl-CoA metabolic process	-2.1	3.3	3.2	-0.39		GO Biological Processes	GO:0016055	Wnt signaling pathway	-2.8	1.9	3.4	-1.1
Reactome Gene Sets	R-MMU-416482	G alpha (12/13) signalling events	-2.1	3.3	3.2	-0.39		GO Biological Processes	GO:0009124	nucleoside monophosphate biosynthetic process	-2.8	2.5	3.6	-1.1
GO Biological Processes	GO:0006767	water-soluble vitamin metabolic process	-2.1	3.3	3.2	-0.39		GO Biological Processes	GO:0018027	peptidyl-lysine dimethylation	-2.8	7.4	4.8	-1.1
GO Biological Processes	GO:0008654	phospholipid biosynthetic process	-2.1	1.9	2.8	-0.39		GO Biological Processes	GO:1901160	primary amino compound metabolic process	-2.8	7.4	4.8	-1.1
Reactome Gene Sets	R-MMU-112315	Transmission across Chemical Synapses	-2.1	1.8	2.7	-0.39		GO Biological Processes	GO:0032688	negative regulation of interferon-beta production	-2.8	7.4	4.8	-1.1
GO Biological Processes	GO:0006518	peptide metabolic process	-2.1	1.4	2.6	-0.39		GO Biological Processes	GO:1902414	protein localization to cell junction	-2.8	7.4	4.8	-1.1
GO Biological Processes	GO:0016999	antibiotic metabolic process	-2.1	2	2.8	-0.39		GO Biological Processes	GO:0032252	secretory granule localization	-2.8	7.4	4.8	-1.1
KEGG Pathway	mmu04145	Phagosome	-2.1	1.8	2.7	-0.38		GO Biological Processes	GO:0044065	regulation of respiratory system process	-2.8	7.4	4.8	-1.1
Reactome Gene Sets	R-MMU-1236975	Antigen processing-Cross presentation	-2.1	2.9	3.1	-0.37		GO Biological Processes	GO:0030218	erythrocyte differentiation	-2.8	2.7	3.7	-1.1
GO Biological Processes	GO:0070059	intrinsic apoptotic signaling pathway in response to endoplasmic reticulum stress	-2.1	2.5	3	-0.37		GO Biological Processes	GO:0008360	regulation of cell shape	-2.8	2.6	3.6	-1.1
GO Biological Processes	GO:0006914	autophagy	-2	1.5	2.6	-0.36		Reactome Gene Sets	R-MMU-186797	Signaling by PDGF	-2.8	4	4	-1.1
GO Biological Processes	GO:0061919	process utilizing autophagic mechanism	-2	1.5	2.6	-0.36		KEGG Pathway	mmu04919	Thyroid hormone signaling pathway	-2.8	2.8	3.7	-1.1
GO Biological Processes	GO:0080135	regulation of cellular response to stress	-2	1.4	2.6	-0.36		GO Biological Processes	GO:0098727	maintenance of cell number	-2.8	2.5	3.6	-1.1
Reactome Gene Sets	R-MMU-8876198	RAB GEFs exchange GTP for GDP on RABs	-2	2.3	2.9	-0.36		GO Biological Processes	GO:0198738	cell-cell signaling by wnt	-2.8	1.8	3.3	-1.1
Reactome Gene Sets	R-MMU-382556	ABC-family proteins mediated transport	-2	2.7	3	-0.34		GO Biological Processes	GO:0032008	positive regulation of TOR signaling	-2.7	4.6	4.2	-1.1
Reactome Gene Sets	R-MMU-111885	Opioid Signalling	-2	2.4	2.9	-0.34		GO Biological Processes	GO:0099003	vesicle-mediated transport in synapse	-2.7	2.2	3.4	-1.1
Reactome Gene Sets	R-MMU-69275	G2/M Transition	-2	2	2.7	-0.34		GO Biological Processes	GO:0034329	cell junction assembly	-2.7	2.3	3.5	-1.1
GO Biological Processes	GO:0051301	cell division	-2	1.4	2.5	-0.34		GO Biological Processes	GO:1900543	negative regulation of purine nucleotide metabolic process	-2.7	5.5	4.4	-1.1
Reactome Gene Sets	R-MMU-1168372	Downstream signaling events of B Cell Receptor (BCR)	-2	3.2	3.1	-0.34		GO Biological Processes	GO:0061298	retina vasculature development in camera-type eye	-2.7	5.5	4.4	-1.1
KEGG Pathway	mmu00500	Starch and sucrose metabolism	-2	3.2	3.1	-0.34		GO Biological Processes	GO:1901538	changes to DNA methylation involved in embryo development	-2.7	11	5.4	-1.1
GO Biological Processes	GO:2000785	regulation of autophagosome assembly	-2	3.2	3.1	-0.34		GO Biological Processes	GO:0043045	DNA methylation involved in embryo development	-2.7	11	5.4	-1.1
GO Biological Processes	GO:0051223	regulation of protein transport	-2	1.4	2.5	-0.34		GO Biological Processes	GO:0097151	positive regulation of inhibitory postsynaptic potential	-2.7	11	5.4	-1.1
GO Biological Processes	GO:0055067	monovalent inorganic cation homeostasis	-2	1.9	2.7	-0.34		GO Biological Processes	GO:0014014	negative regulation of gliogenesis	-2.7	3.9	4	-1.1
GO Biological Processes	GO:0050435	amyloid-beta metabolic process	-2	2.9	3	-0.33		GO Biological Processes	GO:0001885	endothelial cell development	-2.7	3.5	3.9	-1
GO Biological Processes	GO:0006040	amino sugar metabolic process	-2	2.9	3	-0.33		GO Biological Processes	GO:0009314	response to radiation	-2.7	1.9	3.3	-1
Reactome Gene Sets	R-MMU-68949	Orc1 removal from chromatin	-2	3.7	3.2	-0.33		GO Biological Processes	GO:0043500	muscle adaptation	-2.7	2.8	3.6	-1
								GO Biological Processes	GO:0009416	response to light stimulus	-2.7	2.1	3.4	-1
								GO Biological Processes	GO:0006342	chromatin silencing	-2.7	3.2	3.7	-1
								GO Biological Processes	GO:0046434	organophosphate catabolic process	-2.7	2.3	3.4	-1
								GO Biological Processes	GO:0045732	positive regulation of protein catabolic process	-2.7	2.3	3.4	-1
								GO Biological Processes	GO:1903053	regulation of extracellular matrix organization	-2.7	4.5	4.1	-1
								GO Biological Processes	GO:0048511	rhythmic process	-2.7	2	3.3	-1
								GO Biological Processes	GO:0017148	negative regulation of translation	-2.7	2.6	3.5	-1
								GO Biological Processes	GO:0032535	regulation of cellular component size	-2.7	1.9	3.3	-1
								GO Biological Processes	GO:0001654	eye development	-2.7	1.9	3.3	-1
								GO Biological Processes	GO:0045980	negative regulation of nucleotide metabolic process	-2.7	5.3	4.3	-1
								GO Biological Processes	GO:0002009	morphogenesis of an epithelium	-2.7	1.7	3.2	-1
								GO Biological Processes	GO:0043242	negative regulation of protein complex disassembly	-2.7	3.2	3.7	-1
								GO Biological Processes	GO:0009205	purine ribonucleoside triphosphate metabolic process	-2.7	2.1	3.3	-1
								GO Biological Processes	GO:0048871	multicellular organismal homeostasis	-2.7	1.8	3.2	-1
								GO Biological Processes	GO:0062013	positive regulation of small molecule metabolic process	-2.6	2.5	3.5	-0.99
								GO Biological Processes	GO:0043543	protein acylation	-2.6	2.2	3.4	-0.99
								GO Biological Processes	GO:0048593	camera-type eye morphogenesis	-2.6	2.6	3.5	-0.99
								GO Biological Processes	GO:0031644	regulation of neurological system process	-2.6	2.4	3.4	-0.99
								GO Biological Processes	GO:0072358	cardiovascular system development	-2.6	1.6	3.1	-0.99
								Reactome Gene Sets	R-MMU-8943724	Regulation of PTEN gene transcription	-2.6	4.4	4	-0.99
								GO Biological Processes	GO:0097484	dendrite extension	-2.6	4.4	4	-0.99
								GO Biological Processes	GO:0009895	negative regulation of catabolic process	-2.6	2	3.3	-0.98
								GO Biological Processes	GO:1903311	regulation of mRNA metabolic process	-2.6	2.1	3.3	-0.98
								GO Biological Processes	GO:0006091	generation of precursor metabolites and energy	-2.6	1.9	3.2	-0.98
								GO Biological Processes	GO:0150063	visual system development	-2.6	1.9	3.2	-0.98
								GO Biological Processes	GO:0043087	regulation of GTPase activity	-2.6	2	3.3	-0.97
								GO Biological Processes	GO:0090092	regulation of transmembrane receptor protein serine/threonine kinase signaling pathway	-2.6	2.2	3.3	-0.97
								GO Biological Processes	GO:0016049	cell growth	-2.6	1.7	3.2	-0.97
								GO Biological Processes	GO:0051258	protein polymerization	-2.6	2.1	3.3	-0.96
								GO Biological Processes	GO:0071466	cellular response to xenobiotic stimulus	-2.6	2.5	3.4	-0.96
								GO Biological Processes	GO:0000910	cytokinesis	-2.6	2.5	3.4	-0.96
								GO Biological Processes	GO:0010906	regulation of glucose metabolic process	-2.6	2.7	3.5	-0.96
								GO Biological Processes	GO:0002790	peptide secretion	-2.6	1.6	3.1	-0.96
								GO Biological Processes	GO:0009199	ribonucleoside triphosphate metabolic process	-2.6	2	3.3	-0.95
								GO Biological Processes	GO:0044270	cellular nitrogen compound catabolic process	-2.6	1.8	3.2	-0.95
								GO Biological Processes	GO:0030518	intracellular steroid hormone receptor signaling pathway	-2.6	2.9	3.5	-0.95
								GO Biological Processes	GO:0017015	regulation of transforming growth factor beta receptor signaling pathway	-2.6	2.9	3.5	-0.95
								GO Biological Processes	GO:0048880	sensory system development	-2.6	1.8	3.2	-0.95
								GO Biological Processes	GO:0018105	peptidyl-serine phosphorylation	-2.6	2	3.2	-0.95
								GO Biological Processes	GO:0072578	neurotransmitter-gated ion channel clustering	-2.6	6.6	4.4	-0.95
								GO Biological Processes	GO:0038092	nodal signaling pathway	-2.6	6.6	4.4	-0.95
								GO Biological Processes	GO:0051961	negative regulation of nervous system development	-2.6	1.9	3.2	-0.95
								GO Biological Processes	GO:0048592	eye morphogenesis	-2.6	2.4	3.4	-0.95
								GO Biological Processes	GO:0032271	regulation of protein polymerization	-2.6	2.2	3.3	-0.95
								GO Biological Processes	GO:0030335	positive regulation of cell migration	-2.6	1.7	3.1	-0.95
								GO Biological Processes	GO:1901628	positive regulation of postsynaptic membrane organization	-2.6	9.9	5	-0.95
								GO Biological Processes	GO:0032328	alanine transport	-2.6	9.9	5	-0.95
								GO Biological Processes	GO:0046643	regulation of gamma-delta T cell activation	-2.6	9.9	5	-0.95
								GO Biological Processes	GO:0098828	modulation of inhibitory postsynaptic potential	-2.6	9.9	5	-0.95
								GO Biological Processes	GO:0045586	regulation of gamma-delta T cell differentiation	-2.6	9.9	5	-0.95
								GO Biological Processes	GO:0048568	embryonic organ development	-2.6	1.7	3.1	-0.95
								GO Biological Processes	GO:0090087	regulation of peptide transport	-2.6	1.6	3.1	-0.94
								GO Biological Processes	GO:0055088	lipid homeostasis	-2.5	2.5	3.4	-0.92
								GO Biological Processes	GO:0010921	regulation of phosphatase activity	-2.5	2.7	3.4	-0.92
								GO Biological Processes	GO:0001667	ameboidal-type cell migration	-2.5	1.8	3.1	-0.92
								GO Biological Processes	GO:0001944	vasculature development	-2.5	1.6	3	-0.92
								GO Biological Processes	GO:0043433	negative regulation of DNA-binding transcription factor activity	-2.5	2.4	3.4	-0.92
								GO Biological Processes	GO:0030833	regulation of actin filament polymerization	-2.5	2.4	3.4	-0.92
								Reactome Gene Sets	R-MMU-73762	RNA Polymerase I Transcription Initiation	-2.5	4.2	3.9	-0.92
								GO Biological Processes	GO:0061326	renal tubule development	-2.5	2.8	3.5	-0.91
								GO Biological Processes	GO:1903844	regulation of cellular response to transforming growth factor beta stimulus	-2.5	2.8	3.5	-0.91
								GO Biological Processes	GO:0038127	ERBB signaling pathway	-2.5	2.8	3.5	-0.91
								GO Biological Processes	GO:0010769	regulation of cell morphogenesis involved in differentiation	-2.5	1.9	3.2	-0.91
								Reactome Gene Sets	R-MMU-112315	Transmission across Chemical Synapses	-2.5	2.2	3.3	-0.91
								GO Biological Processes	GO:0006094	gluconeogenesis	-2.5	3.3	3.6	-0.91
								GO Biological Processes	GO:0060070	canonical Wnt signaling pathway	-2.5	2	3.2	-0.91
								GO Biological Processes	GO:0043549	regulation of kinase activity	-2.5	1.6	3	-0.91
								GO Biological Processes	GO:0001558	regulation of cell growth	-2.5	1.8	3.1	-0.91
								GO Biological Processes	GO:0030832	regulation of actin filament length	-2.5	2.3	3.3	-0.91
								GO Biological Processes	GO:0046700	heterocycle catabolic process	-2.5	1.8	3.1	-0.91
								GO Biological Processes	GO:0043954	cellular component maintenance	-2.5	3.6	3.7	-0.9
								GO Biological Processes	GO:0009144	purine nucleoside triphosphate metabolic process	-2.5	2	3.2	-0.9
								GO Biological Processes	GO:0060627	regulation of vesicle-mediated transport	-2.5	1.7	3	-0.9
								KEGG Pathway	mmu04066	HIF-1 signaling pathway	-2.5	2.8	3.4	-0.9
								GO Biological Processes	GO:0045814	negative regulation of gene expression, epigenetic	-2.5	3	3.5	-0.9
								GO Biological Processes	GO:0040014	regulation of multicellular organism growth	-2.5	3	3.5	-0.9
								Reactome Gene Sets	R-MMU-4420097	VEGFA-VEGFR2 Pathway	-2.5	3	3.5	-0.9
								GO Biological Processes	GO:0045833	negative regulation of lipid metabolic process	-2.5	3	3.5	-0.9
								GO Biological Processes	GO:0009267	cellular response to starvation	-2.5	2.5	3.3	-0.9
								GO Biological Processes	GO:0048712	negative regulation of astrocyte differentiation	-2.5	6.3	4.3	-0.9
								KEGG Pathway	M00003	Gluconeogenesis, oxaloacetate => fructose-6P	-2.5	6.3	4.3	-0.9
								GO Biological Processes	GO:0042219	cellular modified amino acid catabolic process	-2.5	6.3	4.3	-0.9
								GO Biological Processes	GO:1903909	regulation of receptor clustering	-2.5	6.3	4.3	-0.9
								KEGG Pathway	mmu_M00003	Gluconeogenesis, oxaloacetate => fructose-6P	-2.5	6.3	4.3	-0.9
								GO Biological Processes	GO:0000226	microtubule cytoskeleton organization	-2.5	1.7	3	-0.9
								GO Biological Processes	GO:0018107	peptidyl-threonine phosphorylation	-2.5	2.6	3.4	-0.9
								GO Biological Processes	GO:0090596	sensory organ morphogenesis	-2.5	2	3.2	-0.9
								GO Biological Processes	GO:0014743	regulation of muscle hypertrophy	-2.5	3.2	3.6	-0.9
								GO Biological Processes	GO:0071385	cellular response to glucocorticoid stimulus	-2.5	4.1	3.8	-0.9
								GO Biological Processes	GO:0032924	activin receptor signaling pathway	-2.5	4.1	3.8	-0.9
								GO Biological Processes	GO:0043124	negative regulation of I-kappaB kinase/NF-kappaB signaling	-2.5	4.1	3.8	-0.9
								GO Biological Processes	GO:0040017	positive regulation of locomotion	-2.5	1.7	3	-0.89
								GO Biological Processes	GO:0014070	response to organic cyclic compound	-2.5	1.6	3	-0.89
								GO Biological Processes	GO:0098693	regulation of synaptic vesicle cycle	-2.5	2.5	3.3	-0.89
								GO Biological Processes	GO:0010614	negative regulation of cardiac muscle hypertrophy	-2.5	4.8	3.9	-0.88
								KEGG Pathway	mmu04710	Circadian rhythm	-2.5	4.8	3.9	-0.88
								GO Biological Processes	GO:0030879	mammary gland development	-2.5	2.4	3.3	-0.88
								GO Biological Processes	GO:0099175	regulation of postsynapse organization	-2.5	2.6	3.4	-0.88
								GO Biological Processes	GO:0034332	adherens junction organization	-2.5	2.6	3.4	-0.88
								GO Biological Processes	GO:0015807	L-amino acid transport	-2.5	3.5	3.6	-0.88
								Reactome Gene Sets	R-MMU-422356	Regulation of insulin secretion	-2.5	3.5	3.6	-0.88
								GO Biological Processes	GO:0008154	actin polymerization or depolymerization	-2.5	2.2	3.2	-0.88
								GO Biological Processes	GO:0010638	positive regulation of organelle organization	-2.4	1.7	3	-0.88
								GO Biological Processes	GO:0040029	regulation of gene expression, epigenetic	-2.4	2	3.1	-0.88
								GO Biological Processes	GO:0043010	camera-type eye development	-2.4	1.9	3.1	-0.88
								GO Biological Processes	GO:0070848	response to growth factor	-2.4	1.6	3	-0.88
								GO Biological Processes	GO:0051705	multi-organism behavior	-2.4	3.2	3.5	-0.88
								GO Biological Processes	GO:0030073	insulin secretion	-2.4	2.1	3.2	-0.87
								GO Biological Processes	GO:0009152	purine ribonucleotide biosynthetic process	-2.4	2.1	3.2	-0.87
								GO Biological Processes	GO:0010565	regulation of cellular ketone metabolic process	-2.4	2.6	3.3	-0.87
								GO Biological Processes	GO:0031667	response to nutrient levels	-2.4	1.8	3.1	-0.87
								GO Biological Processes	GO:0018023	peptidyl-lysine trimethylation	-2.4	4	3.7	-0.87
								GO Biological Processes	GO:0061028	establishment of endothelial barrier	-2.4	4	3.7	-0.87
								GO Biological Processes	GO:0043201	response to leucine	-2.4	8.9	4.7	-0.87
								GO Biological Processes	GO:0032927	positive regulation of activin receptor signaling pathway	-2.4	8.9	4.7	-0.87
								GO Biological Processes	GO:1990253	cellular response to leucine starvation	-2.4	8.9	4.7	-0.87
								GO Biological Processes	GO:1903911	positive regulation of receptor clustering	-2.4	8.9	4.7	-0.87
								CORUM	CORUM:6882	Periaxin complex	-2.4	8.9	4.7	-0.87
								GO Biological Processes	GO:0033029	regulation of neutrophil apoptotic process	-2.4	8.9	4.7	-0.87
								GO Biological Processes	GO:0071233	cellular response to leucine	-2.4	8.9	4.7	-0.87
								GO Biological Processes	GO:0070857	regulation of bile acid biosynthetic process	-2.4	8.9	4.7	-0.87
								GO Biological Processes	GO:0035947	regulation of gluconeogenesis by regulation of transcription from RNA polymerase II promoter	-2.4	8.9	4.7	-0.87
								GO Biological Processes	GO:0061351	neural precursor cell proliferation	-2.4	2.3	3.2	-0.87
								GO Biological Processes	GO:0019318	hexose metabolic process	-2.4	2.1	3.2	-0.86
								GO Biological Processes	GO:0099504	synaptic vesicle cycle	-2.4	2.1	3.2	-0.86
								GO Biological Processes	GO:0001666	response to hypoxia	-2.4	2.2	3.2	-0.86
								KEGG Pathway	mmu04144	Endocytosis	-2.4	2	3.1	-0.86
								GO Biological Processes	GO:0019319	hexose biosynthetic process	-2.4	3.1	3.5	-0.86
								GO Biological Processes	GO:1901880	negative regulation of protein depolymerization	-2.4	3.1	3.5	-0.86
								GO Biological Processes	GO:0033599	regulation of mammary gland epithelial cell proliferation	-2.4	6	4.1	-0.86
								GO Biological Processes	GO:0051195	negative regulation of cofactor metabolic process	-2.4	6	4.1	-0.86
								GO Biological Processes	GO:0019439	aromatic compound catabolic process	-2.4	1.7	3	-0.85
								GO Biological Processes	GO:0045931	positive regulation of mitotic cell cycle	-2.4	2.3	3.2	-0.85
								GO Biological Processes	GO:0001568	blood vessel development	-2.4	1.6	2.9	-0.84
								GO Biological Processes	GO:0003382	epithelial cell morphogenesis	-2.4	3.9	3.6	-0.84
								GO Biological Processes	GO:0071384	cellular response to corticosteroid stimulus	-2.4	3.9	3.6	-0.84
								GO Biological Processes	GO:0010799	regulation of peptidyl-threonine phosphorylation	-2.4	3.9	3.6	-0.84
								GO Biological Processes	GO:0042058	regulation of epidermal growth factor receptor signaling pathway	-2.4	3.4	3.5	-0.83
								GO Biological Processes	GO:0048286	lung alveolus development	-2.4	3.4	3.5	-0.83
								GO Biological Processes	GO:0035303	regulation of dephosphorylation	-2.4	2.3	3.2	-0.83
								GO Biological Processes	GO:0046034	ATP metabolic process	-2.4	2	3.1	-0.83
								GO Biological Processes	GO:0051186	cofactor metabolic process	-2.4	1.7	3	-0.83
								GO Biological Processes	GO:0097061	dendritic spine organization	-2.4	2.8	3.4	-0.83
								GO Biological Processes	GO:0002064	epithelial cell development	-2.3	2	3.1	-0.82
								Reactome Gene Sets	R-MMU-5633007	Regulation of TP53 Activity	-2.3	2.7	3.3	-0.81
								GO Biological Processes	GO:1902904	negative regulation of supramolecular fiber organization	-2.3	2.4	3.2	-0.81
								GO Biological Processes	GO:0071363	cellular response to growth factor stimulus	-2.3	1.6	2.9	-0.81
								GO Biological Processes	GO:0009306	protein secretion	-2.3	1.6	2.9	-0.81
								GO Biological Processes	GO:1903146	regulation of autophagy of mitochondrion	-2.3	4.5	3.8	-0.81
								GO Biological Processes	GO:0007026	negative regulation of microtubule depolymerization	-2.3	4.5	3.8	-0.81
								GO Biological Processes	GO:1901890	positive regulation of cell junction assembly	-2.3	4.5	3.8	-0.81
								GO Biological Processes	GO:0033598	mammary gland epithelial cell proliferation	-2.3	4.5	3.8	-0.81
								GO Biological Processes	GO:0034644	cellular response to UV	-2.3	3.1	3.4	-0.81
								KEGG Pathway	mmu01230	Biosynthesis of amino acids	-2.3	3.1	3.4	-0.81
								Reactome Gene Sets	R-MMU-6807070	PTEN Regulation	-2.3	3.4	3.5	-0.81
								GO Biological Processes	GO:0060560	developmental growth involved in morphogenesis	-2.3	2	3	-0.81
								GO Biological Processes	GO:0051489	regulation of filopodium assembly	-2.3	3.8	3.6	-0.81
								GO Biological Processes	GO:0006349	regulation of gene expression by genetic imprinting	-2.3	5.7	4	-0.8
								GO Biological Processes	GO:0098969	neurotransmitter receptor transport to postsynaptic membrane	-2.3	5.7	4	-0.8
								GO Biological Processes	GO:0003177	pulmonary valve development	-2.3	5.7	4	-0.8
								GO Biological Processes	GO:2000136	regulation of cell proliferation involved in heart morphogenesis	-2.3	5.7	4	-0.8
								GO Biological Processes	GO:0048638	regulation of developmental growth	-2.3	1.8	2.9	-0.8
								GO Biological Processes	GO:0009991	response to extracellular stimulus	-2.3	1.8	2.9	-0.8
								GO Biological Processes	GO:2000147	positive regulation of cell motility	-2.3	1.6	2.9	-0.79
								GO Biological Processes	GO:0036293	response to decreased oxygen levels	-2.3	2.1	3	-0.79
								GO Biological Processes	GO:0046890	regulation of lipid biosynthetic process	-2.3	2.3	3.1	-0.79
								GO Biological Processes	GO:0071456	cellular response to hypoxia	-2.3	2.8	3.3	-0.79
								GO Biological Processes	GO:0032465	regulation of cytokinesis	-2.3	3	3.3	-0.79
								GO Biological Processes	GO:0090066	regulation of anatomical structure size	-2.3	1.6	2.9	-0.79
								GO Biological Processes	GO:0007346	regulation of mitotic cell cycle	-2.3	1.7	2.9	-0.79
								GO Biological Processes	GO:0070278	extracellular matrix constituent secretion	-2.3	8.1	4.4	-0.79
								GO Biological Processes	GO:1901163	regulation of trophoblast cell migration	-2.3	8.1	4.4	-0.79
								GO Biological Processes	GO:0097113	AMPA glutamate receptor clustering	-2.3	8.1	4.4	-0.79
								GO Biological Processes	GO:0014874	response to stimulus involved in regulation of muscle adaptation	-2.3	8.1	4.4	-0.79
								GO Biological Processes	GO:0010872	regulation of cholesterol esterification	-2.3	8.1	4.4	-0.79
								GO Biological Processes	GO:0061299	retina vasculature morphogenesis in camera-type eye	-2.3	8.1	4.4	-0.79
								KEGG Pathway	mmu_M00035	Methionine degradation	-2.3	8.1	4.4	-0.79
								KEGG Pathway	M00035	Methionine degradation	-2.3	8.1	4.4	-0.79
								GO Biological Processes	GO:0032102	negative regulation of response to external stimulus	-2.3	1.9	2.9	-0.78
								GO Biological Processes	GO:0007178	transmembrane receptor protein serine/threonine kinase signaling pathway	-2.3	1.8	2.9	-0.78
								GO Biological Processes	GO:0061005	cell differentiation involved in kidney development	-2.3	3.7	3.5	-0.78
								GO Biological Processes	GO:0034655	nucleobase-containing compound catabolic process	-2.3	1.7	2.9	-0.78
								GO Biological Processes	GO:0033032	regulation of myeloid cell apoptotic process	-2.3	4.4	3.7	-0.78
								GO Biological Processes	GO:0000002	mitochondrial genome maintenance	-2.3	4.4	3.7	-0.78
								GO Biological Processes	GO:0018210	peptidyl-threonine modification	-2.3	2.5	3.2	-0.77
								GO Biological Processes	GO:0022411	cellular component disassembly	-2.3	1.8	2.9	-0.77
								GO Biological Processes	GO:0010923	negative regulation of phosphatase activity	-2.3	3	3.3	-0.77
								GO Biological Processes	GO:0009260	ribonucleotide biosynthetic process	-2.3	2.1	3	-0.77
								GO Biological Processes	GO:0060541	respiratory system development	-2.3	2	3	-0.77
								GO Biological Processes	GO:0034248	regulation of cellular amide metabolic process	-2.3	1.8	2.9	-0.76
								GO Biological Processes	GO:0051223	regulation of protein transport	-2.3	1.6	2.8	-0.76
								GO Biological Processes	GO:0071900	regulation of protein serine/threonine kinase activity	-2.3	1.7	2.9	-0.76
								GO Biological Processes	GO:1904375	regulation of protein localization to cell periphery	-2.3	2.4	3.1	-0.76
								GO Biological Processes	GO:0010976	positive regulation of neuron projection development	-2.2	1.8	2.9	-0.75
								GO Biological Processes	GO:0032042	mitochondrial DNA metabolic process	-2.2	5.4	3.9	-0.75
								GO Biological Processes	GO:0061323	cell proliferation involved in heart morphogenesis	-2.2	5.4	3.9	-0.75
								GO Biological Processes	GO:0070734	histone H3-K27 methylation	-2.2	5.4	3.9	-0.75
								GO Biological Processes	GO:1903540	establishment of protein localization to postsynaptic membrane	-2.2	5.4	3.9	-0.75
								GO Biological Processes	GO:0098877	neurotransmitter receptor transport to plasma membrane	-2.2	5.4	3.9	-0.75
								GO Biological Processes	GO:0010666	positive regulation of cardiac muscle cell apoptotic process	-2.2	5.4	3.9	-0.75
								Reactome Gene Sets	R-MMU-389357	CD28 dependent PI3K/Akt signaling	-2.2	5.4	3.9	-0.75
								Reactome Gene Sets	R-MMU-194138	Signaling by VEGF	-2.2	2.7	3.2	-0.75
								GO Biological Processes	GO:0034762	regulation of transmembrane transport	-2.2	1.6	2.8	-0.75
								GO Biological Processes	GO:0071478	cellular response to radiation	-2.2	2.3	3.1	-0.74
								GO Biological Processes	GO:0071453	cellular response to oxygen levels	-2.2	2.4	3.1	-0.74
								GO Biological Processes	GO:0048710	regulation of astrocyte differentiation	-2.2	4.3	3.6	-0.74
								GO Biological Processes	GO:0055090	acylglycerol homeostasis	-2.2	4.3	3.6	-0.74
								GO Biological Processes	GO:1904707	positive regulation of vascular smooth muscle cell proliferation	-2.2	4.3	3.6	-0.74
								GO Biological Processes	GO:0070328	triglyceride homeostasis	-2.2	4.3	3.6	-0.74
								GO Biological Processes	GO:0051567	histone H3-K9 methylation	-2.2	4.3	3.6	-0.74
								GO Biological Processes	GO:0035308	negative regulation of protein dephosphorylation	-2.2	4.3	3.6	-0.74
								GO Biological Processes	GO:0009141	nucleoside triphosphate metabolic process	-2.2	1.9	2.9	-0.74
								GO Biological Processes	GO:0048639	positive regulation of developmental growth	-2.2	2.1	3	-0.74
								GO Biological Processes	GO:0033673	negative regulation of kinase activity	-2.2	2.1	3	-0.74
								GO Biological Processes	GO:0045859	regulation of protein kinase activity	-2.2	1.6	2.8	-0.74
								GO Biological Processes	GO:1990138	neuron projection extension	-2.2	2.1	3	-0.74
								GO Biological Processes	GO:0007498	mesoderm development	-2.2	2.5	3.1	-0.74
								GO Biological Processes	GO:0043244	regulation of protein complex disassembly	-2.2	2.5	3.1	-0.74
								GO Biological Processes	GO:0010771	negative regulation of cell morphogenesis involved in differentiation	-2.2	2.7	3.2	-0.74
								GO Biological Processes	GO:0045598	regulation of fat cell differentiation	-2.2	2.4	3.1	-0.73
								GO Biological Processes	GO:0009791	post-embryonic development	-2.2	2.4	3.1	-0.73
								GO Biological Processes	GO:0007017	microtubule-based process	-2.2	1.5	2.7	-0.73
								Reactome Gene Sets	R-MMU-193704	p75 NTR receptor-mediated signalling	-2.2	2.9	3.2	-0.73
								GO Biological Processes	GO:0046364	monosaccharide biosynthetic process	-2.2	2.9	3.2	-0.73
								GO Biological Processes	GO:0018209	peptidyl-serine modification	-2.2	1.8	2.9	-0.73
								GO Biological Processes	GO:0030072	peptide hormone secretion	-2.2	1.9	2.9	-0.73
								GO Biological Processes	GO:0051648	vesicle localization	-2.2	1.9	2.9	-0.73
								Reactome Gene Sets	R-MMU-983169	Class I MHC mediated antigen processing & presentation	-2.2	1.9	2.9	-0.72
								GO Biological Processes	GO:0034249	negative regulation of cellular amide metabolic process	-2.2	2.3	3	-0.72
								GO Biological Processes	GO:0070201	regulation of establishment of protein localization	-2.2	1.5	2.7	-0.72
								GO Biological Processes	GO:0032922	circadian regulation of gene expression	-2.2	3.2	3.3	-0.72
								GO Biological Processes	GO:1901184	regulation of ERBB signaling pathway	-2.2	3.2	3.3	-0.72
								KEGG Pathway	mmu04550	Signaling pathways regulating pluripotency of stem cells	-2.2	2.4	3	-0.72
								GO Biological Processes	GO:1904251	regulation of bile acid metabolic process	-2.2	7.4	4.2	-0.72
								GO Biological Processes	GO:0070986	left/right axis specification	-2.2	7.4	4.2	-0.72
								GO Biological Processes	GO:0097688	glutamate receptor clustering	-2.2	7.4	4.2	-0.72
								GO Biological Processes	GO:0072044	collecting duct development	-2.2	7.4	4.2	-0.72
								GO Biological Processes	GO:2000615	regulation of histone H3-K9 acetylation	-2.2	7.4	4.2	-0.72
								GO Biological Processes	GO:0001781	neutrophil apoptotic process	-2.2	7.4	4.2	-0.72
								GO Biological Processes	GO:0090557	establishment of endothelial intestinal barrier	-2.2	7.4	4.2	-0.72
								GO Biological Processes	GO:0007440	foregut morphogenesis	-2.2	7.4	4.2	-0.72
								GO Biological Processes	GO:0061450	trophoblast cell migration	-2.2	7.4	4.2	-0.72
								GO Biological Processes	GO:0008202	steroid metabolic process	-2.2	1.9	2.9	-0.72
								GO Biological Processes	GO:0048009	insulin-like growth factor receptor signaling pathway	-2.2	4.1	3.5	-0.72
								GO Biological Processes	GO:0031114	regulation of microtubule depolymerization	-2.2	4.1	3.5	-0.72
								GO Biological Processes	GO:0003176	aortic valve development	-2.2	5.2	3.7	-0.72
								GO Biological Processes	GO:0060080	inhibitory postsynaptic potential	-2.2	5.2	3.7	-0.72
								GO Biological Processes	GO:0010663	positive regulation of striated muscle cell apoptotic process	-2.2	5.2	3.7	-0.72
								GO Biological Processes	GO:0043576	regulation of respiratory gaseous exchange	-2.2	5.2	3.7	-0.72
								Reactome Gene Sets	R-MMU-9006934	Signaling by Receptor Tyrosine Kinases	-2.2	1.8	2.8	-0.71
								GO Biological Processes	GO:0051650	establishment of vesicle localization	-2.2	2	2.9	-0.71
								GO Biological Processes	GO:0006470	protein dephosphorylation	-2.2	2	2.9	-0.71
								GO Biological Processes	GO:0008064	regulation of actin polymerization or depolymerization	-2.2	2.2	3	-0.71
								GO Biological Processes	GO:0006111	regulation of gluconeogenesis	-2.2	3.5	3.3	-0.7
								GO Biological Processes	GO:0046390	ribose phosphate biosynthetic process	-2.1	2	2.9	-0.7
								GO Biological Processes	GO:0045444	fat cell differentiation	-2.1	2	2.9	-0.7
								GO Biological Processes	GO:0016239	positive regulation of macroautophagy	-2.1	3.1	3.2	-0.7
								Reactome Gene Sets	R-MMU-204998	Cell death signalling via NRAGE, NRIF and NADE	-2.1	3.1	3.2	-0.7
								GO Biological Processes	GO:0048168	regulation of neuronal synaptic plasticity	-2.1	3.1	3.2	-0.7
								GO Biological Processes	GO:0050771	negative regulation of axonogenesis	-2.1	3.1	3.2	-0.7
								GO Biological Processes	GO:0043542	endothelial cell migration	-2.1	2.1	2.9	-0.69
								GO Biological Processes	GO:0031532	actin cytoskeleton reorganization	-2.1	2.6	3.1	-0.69
								GO Biological Processes	GO:0106027	neuron projection organization	-2.1	2.6	3.1	-0.69
								GO Biological Processes	GO:0019218	regulation of steroid metabolic process	-2.1	2.6	3.1	-0.69
								GO Biological Processes	GO:0006164	purine nucleotide biosynthetic process	-2.1	2	2.9	-0.69
								GO Biological Processes	GO:0033028	myeloid cell apoptotic process	-2.1	4	3.4	-0.68
								GO Biological Processes	GO:0006520	cellular amino acid metabolic process	-2.1	1.9	2.8	-0.67
								Reactome Gene Sets	R-MMU-983231	Factors involved in megakaryocyte development and platelet production	-2.1	2.5	3	-0.67
								GO Biological Processes	GO:0036294	cellular response to decreased oxygen levels	-2.1	2.5	3	-0.67
								GO Biological Processes	GO:0016573	histone acetylation	-2.1	2.3	3	-0.67
								GO Biological Processes	GO:0032648	regulation of interferon-beta production	-2.1	3.4	3.3	-0.67
								GO Biological Processes	GO:0021587	cerebellum morphogenesis	-2.1	3.4	3.3	-0.67
								GO Biological Processes	GO:2001222	regulation of neuron migration	-2.1	3.4	3.3	-0.67
								GO Biological Processes	GO:0002088	lens development in camera-type eye	-2.1	2.8	3.1	-0.67
								KEGG Pathway	mmu04350	TGF-beta signaling pathway	-2.1	2.8	3.1	-0.67
								GO Biological Processes	GO:0034333	adherens junction assembly	-2.1	2.8	3.1	-0.67
								GO Biological Processes	GO:0042632	cholesterol homeostasis	-2.1	2.8	3.1	-0.67
								GO Biological Processes	GO:0060216	definitive hemopoiesis	-2.1	5	3.6	-0.67
								GO Biological Processes	GO:0031061	negative regulation of histone methylation	-2.1	5	3.6	-0.67
								GO Biological Processes	GO:0062009	secondary palate development	-2.1	5	3.6	-0.67
								Reactome Gene Sets	R-MMU-201451	Signaling by BMP	-2.1	5	3.6	-0.67
								GO Biological Processes	GO:0043255	regulation of carbohydrate biosynthetic process	-2.1	2.6	3	-0.67
								GO Biological Processes	GO:0007565	female pregnancy	-2.1	2.2	2.9	-0.67
								GO Biological Processes	GO:0007416	synapse assembly	-2.1	2.1	2.9	-0.67
								GO Biological Processes	GO:0009165	nucleotide biosynthetic process	-2.1	1.9	2.8	-0.66
								GO Biological Processes	GO:0050806	positive regulation of synaptic transmission	-2.1	1.8	2.7	-0.66
								GO Biological Processes	GO:0010817	regulation of hormone levels	-2.1	1.6	2.7	-0.66
								GO Biological Processes	GO:0043583	ear development	-2.1	2	2.8	-0.66
								GO Biological Processes	GO:0055092	sterol homeostasis	-2.1	2.8	3.1	-0.66
								GO Biological Processes	GO:0008593	regulation of Notch signaling pathway	-2.1	2.8	3.1	-0.66
								GO Biological Processes	GO:0035304	regulation of protein dephosphorylation	-2.1	2.8	3.1	-0.66
								GO Biological Processes	GO:0006898	receptor-mediated endocytosis	-2.1	2	2.8	-0.66
								GO Biological Processes	GO:0051090	regulation of DNA-binding transcription factor activity	-2.1	1.7	2.7	-0.66
								GO Biological Processes	GO:1903670	regulation of sprouting angiogenesis	-2.1	3	3.1	-0.66
								GO Biological Processes	GO:0008542	visual learning	-2.1	3	3.1	-0.66
								GO Biological Processes	GO:0021549	cerebellum development	-2.1	2.6	3	-0.66
								GO Biological Processes	GO:0042136	neurotransmitter biosynthetic process	-2.1	2.6	3	-0.66
								GO Biological Processes	GO:0008544	epidermis development	-2.1	1.8	2.7	-0.66
								GO Biological Processes	GO:0032525	somite rostral/caudal axis specification	-2.1	6.9	3.9	-0.66
								GO Biological Processes	GO:0033169	histone H3-K9 demethylation	-2.1	6.9	3.9	-0.66
								GO Biological Processes	GO:1903651	positive regulation of cytoplasmic transport	-2.1	6.9	3.9	-0.66
								GO Biological Processes	GO:0043970	histone H3-K9 acetylation	-2.1	6.9	3.9	-0.66
								GO Biological Processes	GO:0042492	gamma-delta T cell differentiation	-2.1	6.9	3.9	-0.66
								CORUM	CORUM:2750	Gata1-Fog1-MeCP1 complex	-2.1	6.9	3.9	-0.66
								GO Biological Processes	GO:0035176	social behavior	-2.1	3.4	3.2	-0.66
								GO Biological Processes	GO:0051703	intraspecies interaction between organisms	-2.1	3.4	3.2	-0.66
								Reactome Gene Sets	R-MMU-170834	Signaling by TGF-beta Receptor Complex	-2.1	3.4	3.2	-0.66
								GO Biological Processes	GO:0043666	regulation of phosphoprotein phosphatase activity	-2.1	3.4	3.2	-0.66
								Reactome Gene Sets	R-MMU-1433557	Signaling by SCF-KIT	-2.1	3.9	3.4	-0.66
								GO Biological Processes	GO:0001525	angiogenesis	-2.1	1.6	2.7	-0.65
								GO Biological Processes	GO:0001763	morphogenesis of a branching structure	-2.1	2	2.8	-0.65
								GO Biological Processes	GO:0048732	gland development	-2.1	1.7	2.7	-0.65
								GO Biological Processes	GO:2001252	positive regulation of chromosome organization	-2.1	2.1	2.8	-0.65
								GO Biological Processes	GO:0008306	associative learning	-2.1	2.6	3	-0.64
								GO Biological Processes	GO:0014897	striated muscle hypertrophy	-2.1	2.6	3	-0.64
								GO Biological Processes	GO:0016241	regulation of macroautophagy	-2.1	2.6	3	-0.64
								GO Biological Processes	GO:0072522	purine-containing compound biosynthetic process	-2	1.9	2.8	-0.64
								GO Biological Processes	GO:0001701	in utero embryonic development	-2	1.6	2.6	-0.63
								GO Biological Processes	GO:1903649	regulation of cytoplasmic transport	-2	4.8	3.5	-0.63
								GO Biological Processes	GO:0048266	behavioral response to pain	-2	4.8	3.5	-0.63
								GO Biological Processes	GO:0030325	adrenal gland development	-2	4.8	3.5	-0.63
								GO Biological Processes	GO:0051443	positive regulation of ubiquitin-protein transferase activity	-2	4.8	3.5	-0.63
								GO Biological Processes	GO:0032480	negative regulation of type I interferon production	-2	4.8	3.5	-0.63
								GO Biological Processes	GO:0060041	retina development in camera-type eye	-2	2.2	2.8	-0.63
								GO Biological Processes	GO:0006417	regulation of translation	-2	1.8	2.7	-0.63
								GO Biological Processes	GO:0032608	interferon-beta production	-2	3.3	3.2	-0.63
								GO Biological Processes	GO:0061138	morphogenesis of a branching epithelium	-2	2	2.8	-0.62
								GO Biological Processes	GO:0043269	regulation of ion transport	-2	1.5	2.6	-0.62
								GO Biological Processes	GO:0033044	regulation of chromosome organization	-2	1.8	2.7	-0.62
								GO Biological Processes	GO:0030521	androgen receptor signaling pathway	-2	3.8	3.3	-0.62
								GO Biological Processes	GO:0061333	renal tubule morphogenesis	-2	2.7	3	-0.62
								GO Biological Processes	GO:0030902	hindbrain development	-2	2.2	2.8	-0.62
								GO Biological Processes	GO:0032273	positive regulation of protein polymerization	-2	2.4	2.9	-0.62
								GO Biological Processes	GO:0010611	regulation of cardiac muscle hypertrophy	-2	2.9	3	-0.61
								KEGG Pathway	mmu05220	Chronic myeloid leukemia	-2	2.9	3	-0.61
								GO Biological Processes	GO:0097120	receptor localization to synapse	-2	2.9	3	-0.61
								GO Biological Processes	GO:1901293	nucleoside phosphate biosynthetic process	-2	1.8	2.7	-0.61
								GO Biological Processes	GO:0050796	regulation of insulin secretion	-2	2.1	2.8	-0.61
								KEGG Pathway	mmu05418	Fluid shear stress and atherosclerosis	-2	2.3	2.8	-0.61
								GO Biological Processes	GO:0018393	internal peptidyl-lysine acetylation	-2	2.3	2.8	-0.61

## Sheet: HFD-KO vs RC-WT
Upregulated								Downregulated
Category	GO	Description	LogP	Enrichment	Z-score	Log(q-value)		Category	GO	Description	LogP	Enrichment	Z-score	Log(q-value)
Reactome Gene Sets	R-MMU-72766	Translation	-47	4.2	18	-43		GO Biological Processes	GO:0007017	microtubule-based process	-12	1.8	7.6	-7.4
KEGG Pathway	mmu00190	Oxidative phosphorylation	-42	4.9	18	-38		GO Biological Processes	GO:0120031	plasma membrane bounded cell projection assembly	-11	2	7.5	-7
Reactome Gene Sets	R-MMU-1428517	The citric acid (TCA) cycle and respiratory electron transport	-35	4.6	16	-31		GO Biological Processes	GO:0000226	microtubule cytoskeleton organization	-11	1.9	7.4	-7
KEGG Pathway	mmu05016	Huntington's disease	-34	3.8	15	-30		GO Biological Processes	GO:0030031	cell projection assembly	-11	2	7.4	-7
GO Biological Processes	GO:0007005	mitochondrion organization	-33	2.7	14	-30		GO Biological Processes	GO:0060271	cilium assembly	-11	2.3	7.6	-7
KEGG Pathway	mmu05012	Parkinson's disease	-33	4.3	15	-29		GO Biological Processes	GO:0007420	brain development	-10	1.9	7.2	-7
KEGG Pathway	mmu05010	Alzheimer's disease	-33	3.9	15	-29		GO Biological Processes	GO:0060322	head development	-10	1.8	7	-6.7
GO Biological Processes	GO:0045333	cellular respiration	-30	3.9	14	-26		GO Biological Processes	GO:0007610	behavior	-10	1.8	7	-6.7
GO Biological Processes	GO:0009117	nucleotide metabolic process	-28	2.4	13	-25		GO Biological Processes	GO:0030073	insulin secretion	-10	2.5	7.4	-6.7
KEGG Pathway	mmu03010	Ribosome	-28	3.7	14	-25		GO Biological Processes	GO:0044782	cilium organization	-9.7	2.2	7.1	-6.5
Reactome Gene Sets	R-MMU-72689	Formation of a pool of free 40S subunits	-28	4.7	14	-25		GO Biological Processes	GO:0032870	cellular response to hormone stimulus	-9.7	1.9	7	-6.5
GO Biological Processes	GO:0006753	nucleoside phosphate metabolic process	-28	2.4	13	-25		GO Biological Processes	GO:0030072	peptide hormone secretion	-9.6	2.3	7.2	-6.5
GO Biological Processes	GO:0009150	purine ribonucleotide metabolic process	-28	2.6	13	-24		GO Biological Processes	GO:0120039	plasma membrane bounded cell projection morphogenesis	-9.6	1.8	6.9	-6.5
CORUM	CORUM:382	Respiratory chain complex I, mitochondrial	-27	7	15	-24		GO Biological Processes	GO:0023061	signal release	-9.5	1.9	6.9	-6.4
GO Biological Processes	GO:0022900	electron transport chain	-27	4.9	14	-24		GO Biological Processes	GO:0048858	cell projection morphogenesis	-9.4	1.8	6.8	-6.4
GO Biological Processes	GO:0009259	ribonucleotide metabolic process	-27	2.6	13	-24		GO Biological Processes	GO:0048812	neuron projection morphogenesis	-9.3	1.8	6.7	-6.2
GO Biological Processes	GO:0009167	purine ribonucleoside monophosphate metabolic process	-26	3	13	-23		GO Biological Processes	GO:0031344	regulation of cell projection organization	-9.1	1.7	6.6	-6.1
GO Biological Processes	GO:0009123	nucleoside monophosphate metabolic process	-26	3	13	-23		GO Biological Processes	GO:0006325	chromatin organization	-9.1	1.7	6.6	-6.1
GO Biological Processes	GO:0022904	respiratory electron transport chain	-26	5	14	-23		GO Biological Processes	GO:0032990	cell part morphogenesis	-8.9	1.7	6.5	-5.9
GO Biological Processes	GO:0009126	purine nucleoside monophosphate metabolic process	-26	3	13	-23		GO Biological Processes	GO:0120035	regulation of plasma membrane bounded cell projection organization	-8.6	1.7	6.4	-5.6
Reactome Gene Sets	R-MMU-163200	Respiratory electron transport, ATP synthesis by chemiosmotic coupling, and heat production by uncoupling	-26	4.9	14	-23		GO Biological Processes	GO:0016569	covalent chromatin modification	-8.4	1.9	6.4	-5.5
GO Biological Processes	GO:0019693	ribose phosphate metabolic process	-26	2.5	12	-23		GO Biological Processes	GO:0046879	hormone secretion	-8.1	2	6.4	-5.2
GO Biological Processes	GO:0055086	nucleobase-containing small molecule metabolic process	-26	2.2	12	-23		GO Biological Processes	GO:0009914	hormone transport	-8.1	2	6.3	-5.2
GO Biological Processes	GO:0009161	ribonucleoside monophosphate metabolic process	-26	3	13	-23		GO Biological Processes	GO:0048880	sensory system development	-7.9	1.9	6.3	-5.1
GO Biological Processes	GO:0006163	purine nucleotide metabolic process	-25	2.5	12	-23		GO Biological Processes	GO:0045664	regulation of neuron differentiation	-7.9	1.6	6.1	-5.1
Reactome Gene Sets	R-MMU-72737	Cap-dependent Translation Initiation	-25	4.2	13	-23		GO Biological Processes	GO:0150063	visual system development	-7.7	1.9	6.2	-4.9
Reactome Gene Sets	R-MMU-72613	Eukaryotic Translation Initiation	-25	4.2	13	-23		GO Biological Processes	GO:1990778	protein localization to cell periphery	-7.7	2	6.2	-4.9
GO Biological Processes	GO:0006518	peptide metabolic process	-25	2.1	12	-22		GO Biological Processes	GO:0002790	peptide secretion	-7.6	1.7	6	-4.8
GO Biological Processes	GO:0009205	purine ribonucleoside triphosphate metabolic process	-25	2.9	12	-22		GO Biological Processes	GO:0042593	glucose homeostasis	-7.4	2.1	6.1	-4.6
GO Biological Processes	GO:0046034	ATP metabolic process	-25	3.1	12	-22		GO Biological Processes	GO:0009306	protein secretion	-7.3	1.7	5.9	-4.6
GO Biological Processes	GO:0009141	nucleoside triphosphate metabolic process	-25	2.8	12	-22		GO Biological Processes	GO:0033500	carbohydrate homeostasis	-7.3	2.1	6.1	-4.6
GO Biological Processes	GO:0009144	purine nucleoside triphosphate metabolic process	-25	2.9	12	-22		GO Biological Processes	GO:0097106	postsynaptic density organization	-7.3	4.6	7.1	-4.5
CORUM	CORUM:381	Respiratory chain complex I, mitochondrial	-25	6.9	14	-22		GO Biological Processes	GO:0001654	eye development	-7.2	1.9	5.9	-4.4
Reactome Gene Sets	R-MMU-1799339	SRP-dependent cotranslational protein targeting to membrane	-25	4.6	13	-22		GO Biological Processes	GO:0034330	cell junction organization	-7.2	2.1	6	-4.4
Reactome Gene Sets	R-MMU-156827	L13a-mediated translational silencing of Ceruloplasmin expression	-25	4.2	13	-22		GO Biological Processes	GO:0016570	histone modification	-7.2	1.8	5.9	-4.4
GO Biological Processes	GO:0009199	ribonucleoside triphosphate metabolic process	-25	2.9	12	-22		GO Biological Processes	GO:0035264	multicellular organism growth	-7.1	2.2	6	-4.4
GO Biological Processes	GO:0006091	generation of precursor metabolites and energy	-25	2.6	12	-22		GO Biological Processes	GO:0097107	postsynaptic density assembly	-7	5.8	7.3	-4.3
Reactome Gene Sets	R-MMU-72706	GTP hydrolysis and joining of the 60S ribosomal subunit	-25	4.2	13	-22		GO Biological Processes	GO:0045936	negative regulation of phosphate metabolic process	-7	1.7	5.7	-4.3
Reactome Gene Sets	R-MMU-975956	Nonsense Mediated Decay (NMD) independent of the Exon Junction Complex (EJC)	-24	4.5	13	-22		GO Biological Processes	GO:0010563	negative regulation of phosphorus metabolic process	-7	1.7	5.7	-4.3
GO Biological Processes	GO:0072521	purine-containing compound metabolic process	-24	2.4	12	-21		GO Biological Processes	GO:0008285	negative regulation of cell proliferation	-6.9	1.6	5.6	-4.2
Reactome Gene Sets	R-MMU-5389840	Mitochondrial translation elongation	-23	4.7	13	-21		GO Biological Processes	GO:0050890	cognition	-6.8	2	5.8	-4.2
GO Biological Processes	GO:0017144	drug metabolic process	-23	2.1	11	-20		GO Biological Processes	GO:0009725	response to hormone	-6.8	1.6	5.6	-4.2
GO Biological Processes	GO:0042775	mitochondrial ATP synthesis coupled electron transport	-23	5.5	13	-20		GO Biological Processes	GO:0048667	cell morphogenesis involved in neuron differentiation	-6.8	1.7	5.6	-4.2
KEGG Pathway	mmu04932	Non-alcoholic fatty liver disease (NAFLD)	-23	3.6	12	-20		GO Biological Processes	GO:0030029	actin filament-based process	-6.8	1.6	5.5	-4.2
Reactome Gene Sets	R-MMU-5368287	Mitochondrial translation	-22	4.5	13	-20		GO Biological Processes	GO:0072659	protein localization to plasma membrane	-6.7	2	5.8	-4.1
GO Biological Processes	GO:0033108	mitochondrial respiratory chain complex assembly	-22	4.8	13	-20		GO Biological Processes	GO:0071375	cellular response to peptide hormone stimulus	-6.7	2.1	5.8	-4.1
GO Biological Processes	GO:0043604	amide biosynthetic process	-22	2	11	-20		Reactome Gene Sets	R-MMU-6794362	Protein-protein interactions at synapses	-6.5	3.3	6.2	-3.9
GO Biological Processes	GO:0042773	ATP synthesis coupled electron transport	-22	5.2	13	-19		GO Biological Processes	GO:0031346	positive regulation of cell projection organization	-6.5	1.8	5.5	-3.9
Reactome Gene Sets	R-MMU-5419276	Mitochondrial translation termination	-22	4.5	12	-19		GO Biological Processes	GO:0090276	regulation of peptide hormone secretion	-6.5	2.1	5.7	-3.9
GO Biological Processes	GO:0006119	oxidative phosphorylation	-21	4.2	12	-19		GO Biological Processes	GO:0034762	regulation of transmembrane transport	-6.4	1.7	5.4	-3.9
GO Biological Processes	GO:0032981	mitochondrial respiratory chain complex I assembly	-21	5.9	13	-18		GO Biological Processes	GO:0035418	protein localization to synapse	-6.4	3	6.1	-3.9
GO Biological Processes	GO:0010257	NADH dehydrogenase complex assembly	-21	5.9	13	-18		GO Biological Processes	GO:0048589	developmental growth	-6.3	1.6	5.3	-3.8
Reactome Gene Sets	R-MMU-611105	Respiratory electron transport	-21	5.1	12	-18		GO Biological Processes	GO:0007612	learning	-6.3	2.3	5.7	-3.8
Reactome Gene Sets	R-MMU-6799198	Complex I biogenesis	-21	5.3	12	-18		GO Biological Processes	GO:0050769	positive regulation of neurogenesis	-6.3	1.7	5.3	-3.8
GO Biological Processes	GO:0015980	energy derivation by oxidation of organic compounds	-20	2.8	11	-18		GO Biological Processes	GO:0050796	regulation of insulin secretion	-6.2	2.2	5.6	-3.7
Reactome Gene Sets	R-MMU-927802	Nonsense-Mediated Decay (NMD)	-20	3.8	11	-17		GO Biological Processes	GO:0009855	determination of bilateral symmetry	-6.2	2.5	5.7	-3.7
Reactome Gene Sets	R-MMU-975957	Nonsense Mediated Decay (NMD) enhanced by the Exon Junction Complex (EJC)	-20	3.8	11	-17		GO Biological Processes	GO:0072657	protein localization to membrane	-6.2	1.7	5.3	-3.7
GO Biological Processes	GO:0043043	peptide biosynthetic process	-19	2	10	-17		GO Biological Processes	GO:0007626	locomotory behavior	-6.2	2	5.5	-3.7
GO Biological Processes	GO:0006412	translation	-19	2	9.9	-16		GO Biological Processes	GO:0009799	specification of symmetry	-6.2	2.5	5.7	-3.7
Reactome Gene Sets	R-MMU-72312	rRNA processing	-17	3	10	-14		GO Biological Processes	GO:0099084	postsynaptic specialization organization	-6.1	4	6.3	-3.7
Reactome Gene Sets	R-MMU-6791226	Major pathway of rRNA processing in the nucleolus and cytosol	-17	3	10	-14		GO Biological Processes	GO:0007389	pattern specification process	-6.1	1.7	5.3	-3.7
Reactome Gene Sets	R-MMU-8868773	rRNA processing in the nucleus and cytosol	-17	3	10	-14		GO Biological Processes	GO:1904861	excitatory synapse assembly	-6.1	4.7	6.5	-3.7
GO Biological Processes	GO:0051186	cofactor metabolic process	-17	2.1	9.5	-14		GO Biological Processes	GO:0061564	axon development	-6.1	1.7	5.3	-3.7
GO Biological Processes	GO:0006839	mitochondrial transport	-15	2.8	9.4	-13		GO Biological Processes	GO:0051962	positive regulation of nervous system development	-6	1.6	5.2	-3.6
GO Biological Processes	GO:1901137	carbohydrate derivative biosynthetic process	-15	1.9	8.6	-12		KEGG Pathway	mmu04520	Adherens junction	-6	3.1	5.9	-3.6
Reactome Gene Sets	R-MMU-72695	Formation of the ternary complex, and subsequently, the 43S complex	-14	4.6	9.8	-12		GO Biological Processes	GO:0099173	postsynapse organization	-6	2.2	5.5	-3.6
GO Biological Processes	GO:0009152	purine ribonucleotide biosynthetic process	-14	2.5	8.7	-11		GO Biological Processes	GO:1901653	cellular response to peptide	-5.9	1.9	5.3	-3.5
GO Biological Processes	GO:0009260	ribonucleotide biosynthetic process	-13	2.5	8.5	-11		GO Biological Processes	GO:0043010	camera-type eye development	-5.8	1.8	5.2	-3.4
GO Biological Processes	GO:0046390	ribose phosphate biosynthetic process	-13	2.4	8.4	-10		GO Biological Processes	GO:0098655	cation transmembrane transport	-5.8	1.6	5	-3.4
GO Biological Processes	GO:0072522	purine-containing compound biosynthetic process	-13	2.4	8.4	-10		GO Biological Processes	GO:0097435	supramolecular fiber organization	-5.8	1.6	5	-3.4
GO Biological Processes	GO:1990542	mitochondrial transmembrane transport	-13	3.7	9	-10		Reactome Gene Sets	R-MMU-212436	Generic Transcription Pathway	-5.8	1.6	5	-3.3
GO Biological Processes	GO:0006164	purine nucleotide biosynthetic process	-12	2.4	8.2	-9.9		GO Biological Processes	GO:0007015	actin filament organization	-5.7	1.8	5.1	-3.3
GO Biological Processes	GO:1901293	nucleoside phosphate biosynthetic process	-12	2.2	8.1	-9.7		GO Biological Processes	GO:0051592	response to calcium ion	-5.7	2.5	5.5	-3.3
Reactome Gene Sets	R-MMU-72702	Ribosomal scanning and start codon recognition	-12	4	8.9	-9.6		GO Biological Processes	GO:0007611	learning or memory	-5.7	1.9	5.2	-3.3
Reactome Gene Sets	R-MMU-72649	Translation initiation complex formation	-12	4	8.9	-9.6		GO Biological Processes	GO:1902532	negative regulation of intracellular signal transduction	-5.7	1.7	5	-3.3
GO Biological Processes	GO:0090407	organophosphate biosynthetic process	-12	1.9	7.8	-9.5		GO Biological Processes	GO:0007423	sensory organ development	-5.6	1.6	5	-3.3
GO Biological Processes	GO:0009165	nucleotide biosynthetic process	-12	2.2	7.9	-9.4		GO Biological Processes	GO:0016358	dendrite development	-5.6	1.9	5.1	-3.2
Reactome Gene Sets	R-MMU-72662	Activation of the mRNA upon binding of the cap-binding complex and eIFs, and subsequent binding to 4	-12	4	8.7	-9.3		GO Biological Processes	GO:0042326	negative regulation of phosphorylation	-5.6	1.7	5	-3.2
GO Biological Processes	GO:0051188	cofactor biosynthetic process	-12	2.3	7.9	-9.3		GO Biological Processes	GO:0046883	regulation of hormone secretion	-5.6	1.9	5.1	-3.2
GO Biological Processes	GO:0032543	mitochondrial translation	-11	3.5	8.4	-9		GO Biological Processes	GO:0051493	regulation of cytoskeleton organization	-5.5	1.6	4.9	-3.2
GO Biological Processes	GO:0044283	small molecule biosynthetic process	-11	1.7	7.4	-8.9		GO Biological Processes	GO:0010720	positive regulation of cell development	-5.5	1.6	4.9	-3.2
GO Biological Processes	GO:0009060	aerobic respiration	-11	3.5	8.3	-8.6		GO Biological Processes	GO:0045666	positive regulation of neuron differentiation	-5.5	1.7	5	-3.2
GO Biological Processes	GO:0007006	mitochondrial membrane organization	-11	3.1	8	-8.4		GO Biological Processes	GO:0070986	left/right axis specification	-5.5	6.8	6.6	-3.2
GO Biological Processes	GO:1903047	mitotic cell cycle process	-11	1.7	7.2	-8.4		GO Biological Processes	GO:0031023	microtubule organizing center organization	-5.5	2.4	5.3	-3.2
Reactome Gene Sets	R-MMU-71403	Citric acid cycle (TCA cycle)	-11	6.5	8.9	-8.3		GO Biological Processes	GO:0007368	determination of left/right symmetry	-5.5	2.4	5.3	-3.2
GO Biological Processes	GO:0140053	mitochondrial gene expression	-11	3	7.9	-8.3		GO Biological Processes	GO:0007507	heart development	-5.5	1.6	4.9	-3.2
GO Biological Processes	GO:0009168	purine ribonucleoside monophosphate biosynthetic process	-10	2.6	7.6	-8		GO Biological Processes	GO:0009743	response to carbohydrate	-5.4	2.1	5.1	-3.1
GO Biological Processes	GO:0009127	purine nucleoside monophosphate biosynthetic process	-10	2.6	7.6	-8		GO Biological Processes	GO:0061572	actin filament bundle organization	-5.4	2.2	5.2	-3.1
GO Biological Processes	GO:0006790	sulfur compound metabolic process	-10	2.1	7.3	-8		GO Biological Processes	GO:0048729	tissue morphogenesis	-5.4	1.6	4.8	-3.1
GO Biological Processes	GO:0009124	nucleoside monophosphate biosynthetic process	-10	2.5	7.5	-7.9		GO Biological Processes	GO:1905114	cell surface receptor signaling pathway involved in cell-cell signaling	-5.4	1.6	4.9	-3.1
GO Biological Processes	GO:0042254	ribosome biogenesis	-10	2.1	7.2	-7.9		GO Biological Processes	GO:0045859	regulation of protein kinase activity	-5.4	1.6	4.8	-3.1
GO Biological Processes	GO:0006732	coenzyme metabolic process	-10	2	7.2	-7.8		GO Biological Processes	GO:1902115	regulation of organelle assembly	-5.4	2.1	5.1	-3.1
Reactome Gene Sets	R-MMU-71406	Pyruvate metabolism and Citric Acid (TCA) cycle	-9.9	4	8	-7.6		GO Biological Processes	GO:0043549	regulation of kinase activity	-5.4	1.5	4.8	-3.1
GO Biological Processes	GO:0042255	ribosome assembly	-9.9	3.4	7.8	-7.6		GO Biological Processes	GO:0016311	dephosphorylation	-5.4	1.8	4.9	-3.1
GO Biological Processes	GO:0009156	ribonucleoside monophosphate biosynthetic process	-9.9	2.5	7.4	-7.6		GO Biological Processes	GO:0032886	regulation of microtubule-based process	-5.3	2	5	-3
GO Biological Processes	GO:0051301	cell division	-9.8	1.7	6.9	-7.5		GO Biological Processes	GO:0001678	cellular glucose homeostasis	-5.3	2.2	5.1	-3
Reactome Gene Sets	R-MMU-8953854	Metabolism of RNA	-9.8	1.8	6.9	-7.5		GO Biological Processes	GO:0022604	regulation of cell morphogenesis	-5.3	1.6	4.8	-3
KEGG Pathway	mmu01200	Carbon metabolism	-9.7	2.8	7.4	-7.4		KEGG Pathway	mmu04911	Insulin secretion	-5.3	2.7	5.3	-3
GO Biological Processes	GO:0044282	small molecule catabolic process	-9.6	2	7	-7.4		GO Biological Processes	GO:0034329	cell junction assembly	-5.3	2	5	-3
GO Biological Processes	GO:0009142	nucleoside triphosphate biosynthetic process	-9.6	2.5	7.2	-7.3		GO Biological Processes	GO:0050808	synapse organization	-5.3	1.7	4.8	-3
GO Biological Processes	GO:0009206	purine ribonucleoside triphosphate biosynthetic process	-9.5	2.5	7.2	-7.2		GO Biological Processes	GO:0030855	epithelial cell differentiation	-5.3	1.6	4.8	-3
GO Biological Processes	GO:0009145	purine nucleoside triphosphate biosynthetic process	-9.3	2.5	7.2	-7.1		GO Biological Processes	GO:0098698	postsynaptic specialization assembly	-5.3	4.3	5.9	-3
GO Biological Processes	GO:0015985	energy coupled proton transport, down electrochemical gradient	-9.3	5.4	8.1	-7		GO Biological Processes	GO:0051017	actin filament bundle assembly	-5.2	2.2	5	-3
GO Biological Processes	GO:0015986	ATP synthesis coupled proton transport	-9.3	5.4	8.1	-7		GO Biological Processes	GO:0007169	transmembrane receptor protein tyrosine kinase signaling pathway	-5.2	1.6	4.7	-2.9
GO Biological Processes	GO:0009201	ribonucleoside triphosphate biosynthetic process	-9.1	2.5	7	-6.9		GO Biological Processes	GO:0046626	regulation of insulin receptor signaling pathway	-5	2.8	5.2	-2.8
GO Biological Processes	GO:0006754	ATP biosynthetic process	-9	2.6	7	-6.8		GO Biological Processes	GO:0048598	embryonic morphogenesis	-5	1.5	4.6	-2.7
GO Biological Processes	GO:0006120	mitochondrial electron transport, NADH to ubiquinone	-9	5.6	8	-6.8		GO Biological Processes	GO:0048568	embryonic organ development	-4.9	1.6	4.6	-2.7
GO Biological Processes	GO:0006457	protein folding	-8.8	2.4	6.9	-6.6		GO Biological Processes	GO:0099175	regulation of postsynapse organization	-4.9	2.3	5	-2.7
GO Biological Processes	GO:0072655	establishment of protein localization to mitochondrion	-8.7	2.9	7.1	-6.5		GO Biological Processes	GO:0030036	actin cytoskeleton organization	-4.9	1.5	4.6	-2.7
GO Biological Processes	GO:0043648	dicarboxylic acid metabolic process	-8.6	3	7	-6.3		GO Biological Processes	GO:1901652	response to peptide	-4.9	1.7	4.7	-2.7
GO Biological Processes	GO:0042273	ribosomal large subunit biogenesis	-8.2	3	6.9	-6		GO Biological Processes	GO:0072330	monocarboxylic acid biosynthetic process	-4.9	1.9	4.7	-2.7
GO Biological Processes	GO:0009108	coenzyme biosynthetic process	-8.2	2.2	6.5	-6		GO Biological Processes	GO:0043434	response to peptide hormone	-4.9	1.8	4.7	-2.7
GO Biological Processes	GO:0006626	protein targeting to mitochondrion	-8.1	3.1	6.9	-5.9		GO Biological Processes	GO:0032922	circadian regulation of gene expression	-4.9	2.9	5.2	-2.7
Reactome Gene Sets	R-MMU-556833	Metabolism of lipids	-8.1	1.6	6.1	-5.9		GO Biological Processes	GO:0045446	endothelial cell differentiation	-4.9	2.4	5	-2.7
GO Biological Processes	GO:0070585	protein localization to mitochondrion	-8	2.8	6.7	-5.8		GO Biological Processes	GO:0009749	response to glucose	-4.8	2.1	4.8	-2.6
Reactome Gene Sets	R-MMU-69278	Cell Cycle, Mitotic	-8	1.7	6.1	-5.8		GO Biological Processes	GO:1900076	regulation of cellular response to insulin stimulus	-4.8	2.6	5	-2.6
Reactome Gene Sets	R-MMU-8949613	Cristae formation	-7.9	5.6	7.5	-5.8		GO Biological Processes	GO:0048286	lung alveolus development	-4.8	3	5.1	-2.6
Reactome Gene Sets	R-MMU-163210	Formation of ATP by chemiosmotic coupling	-7.9	5.6	7.5	-5.8		GO Biological Processes	GO:0010975	regulation of neuron projection development	-4.8	1.5	4.5	-2.6
GO Biological Processes	GO:2001233	regulation of apoptotic signaling pathway	-7.8	1.8	6.1	-5.6		GO Biological Processes	GO:0099151	regulation of postsynaptic density assembly	-4.8	5.8	5.9	-2.6
GO Biological Processes	GO:1902600	proton transmembrane transport	-7.5	2.8	6.5	-5.3		GO Biological Processes	GO:0003002	regionalization	-4.8	1.7	4.6	-2.6
KEGG Pathway	mmu01230	Biosynthesis of amino acids	-7.4	2.9	6.4	-5.2		GO Biological Processes	GO:0008286	insulin receptor signaling pathway	-4.8	2.3	4.9	-2.6
GO Biological Processes	GO:0044242	cellular lipid catabolic process	-7.3	2.1	6.1	-5.2		GO Biological Processes	GO:0046628	positive regulation of insulin receptor signaling pathway	-4.7	4.6	5.6	-2.6
GO Biological Processes	GO:0044272	sulfur compound biosynthetic process	-7.2	2.9	6.4	-5.1		GO Biological Processes	GO:0051640	organelle localization	-4.7	1.5	4.4	-2.6
CORUM	CORUM:538	Cytochrome c oxidase, mitochondrial	-7.2	6.5	7.3	-5		GO Biological Processes	GO:0010817	regulation of hormone levels	-4.7	1.6	4.4	-2.5
Reactome Gene Sets	R-MMU-1640170	Cell Cycle	-7.2	1.6	5.7	-5		GO Biological Processes	GO:0007098	centrosome cycle	-4.7	2.3	4.8	-2.5
GO Biological Processes	GO:0006575	cellular modified amino acid metabolic process	-7.2	2.2	6	-5		GO Biological Processes	GO:0007409	axonogenesis	-4.7	1.6	4.5	-2.5
Reactome Gene Sets	R-MMU-1592230	Mitochondrial biogenesis	-7.1	4.5	6.8	-4.9		GO Biological Processes	GO:0034765	regulation of ion transmembrane transport	-4.7	1.6	4.5	-2.5
GO Biological Processes	GO:0005975	carbohydrate metabolic process	-7.1	1.6	5.7	-4.9		GO Biological Processes	GO:0009746	response to hexose	-4.7	2	4.7	-2.5
GO Biological Processes	GO:0022613	ribonucleoprotein complex biogenesis	-7.1	1.7	5.7	-4.9		GO Biological Processes	GO:0072358	cardiovascular system development	-4.7	1.5	4.4	-2.5
CORUM	CORUM:495	Cytochrome bc1-complex, mitochondrial	-7.1	7	7.3	-4.9		KEGG Pathway	mmu05031	Amphetamine addiction	-4.7	2.8	5	-2.5
GO Biological Processes	GO:0009166	nucleotide catabolic process	-7.1	2.3	6.1	-4.9		GO Biological Processes	GO:0070201	regulation of establishment of protein localization	-4.7	1.5	4.4	-2.5
GO Biological Processes	GO:0044743	protein transmembrane import into intracellular organelle	-7	3.7	6.6	-4.9		GO Biological Processes	GO:0071322	cellular response to carbohydrate stimulus	-4.7	2.2	4.7	-2.5
GO Biological Processes	GO:0002181	cytoplasmic translation	-7	2.7	6.2	-4.9		GO Biological Processes	GO:0090087	regulation of peptide transport	-4.7	1.5	4.4	-2.5
GO Biological Processes	GO:0034404	nucleobase-containing small molecule biosynthetic process	-7	2.2	5.9	-4.9		GO Biological Processes	GO:0030522	intracellular receptor signaling pathway	-4.6	2	4.6	-2.5
GO Biological Processes	GO:1901605	alpha-amino acid metabolic process	-6.9	2.1	5.8	-4.8		GO Biological Processes	GO:0034284	response to monosaccharide	-4.6	2	4.6	-2.5
GO Biological Processes	GO:1901292	nucleoside phosphate catabolic process	-6.9	2.3	5.9	-4.7		GO Biological Processes	GO:0002791	regulation of peptide secretion	-4.6	1.6	4.4	-2.5
Reactome Gene Sets	R-MMU-71291	Metabolism of amino acids and derivatives	-6.9	2.1	5.8	-4.7		GO Biological Processes	GO:0051656	establishment of organelle localization	-4.6	1.6	4.4	-2.4
GO Biological Processes	GO:0030150	protein import into mitochondrial matrix	-6.8	5.2	6.8	-4.6		GO Biological Processes	GO:0030111	regulation of Wnt signaling pathway	-4.5	1.8	4.5	-2.4
GO Biological Processes	GO:0016042	lipid catabolic process	-6.7	1.8	5.6	-4.6		KEGG Pathway	mmu04068	FoxO signaling pathway	-4.5	2.2	4.7	-2.4
CORUM	CORUM:3047	Parvulin-associated pre-rRNP complex	-6.7	3.3	6.3	-4.6		GO Biological Processes	GO:0032101	regulation of response to external stimulus	-4.5	1.5	4.3	-2.4
GO Biological Processes	GO:0071806	protein transmembrane transport	-6.7	3.1	6.2	-4.6		GO Biological Processes	GO:0051056	regulation of small GTPase mediated signal transduction	-4.5	1.8	4.5	-2.4
GO Biological Processes	GO:0000028	ribosomal small subunit assembly	-6.7	4.8	6.7	-4.6		GO Biological Processes	GO:0035641	locomotory exploration behavior	-4.5	5.4	5.6	-2.4
GO Biological Processes	GO:0006605	protein targeting	-6.7	1.9	5.7	-4.6		GO Biological Processes	GO:0034332	adherens junction organization	-4.5	2.3	4.7	-2.4
GO Biological Processes	GO:0030258	lipid modification	-6.7	2	5.7	-4.6		GO Biological Processes	GO:0044057	regulation of system process	-4.5	1.5	4.3	-2.4
GO Biological Processes	GO:0006364	rRNA processing	-6.6	2	5.7	-4.5		GO Biological Processes	GO:1905874	regulation of postsynaptic density organization	-4.5	4.8	5.5	-2.4
GO Biological Processes	GO:0006733	oxidoreduction coenzyme metabolic process	-6.6	2.1	5.7	-4.5		GO Biological Processes	GO:0006470	protein dephosphorylation	-4.5	1.9	4.5	-2.4
GO Biological Processes	GO:2001234	negative regulation of apoptotic signaling pathway	-6.6	2	5.6	-4.5		GO Biological Processes	GO:0032024	positive regulation of insulin secretion	-4.5	2.5	4.8	-2.4
Reactome Gene Sets	R-MMU-8978868	Fatty acid metabolism	-6.4	2.1	5.6	-4.3		Reactome Gene Sets	R-MMU-163685	Integration of energy metabolism	-4.5	2.7	4.8	-2.4
GO Biological Processes	GO:0007007	inner mitochondrial membrane organization	-6.3	4	6.3	-4.2		GO Biological Processes	GO:0031646	positive regulation of neurological system process	-4.5	2.6	4.8	-2.4
GO Biological Processes	GO:0140014	mitotic nuclear division	-6.2	1.9	5.4	-4.2		GO Biological Processes	GO:0048511	rhythmic process	-4.4	1.8	4.4	-2.4
GO Biological Processes	GO:0065002	intracellular protein transmembrane transport	-6.2	3.1	5.9	-4.1		KEGG Pathway	mmu04930	Type II diabetes mellitus	-4.4	3.2	5	-2.4
GO Biological Processes	GO:0046395	carboxylic acid catabolic process	-6.2	2	5.4	-4.1		GO Biological Processes	GO:0045216	cell-cell junction organization	-4.4	2.1	4.6	-2.4
GO Biological Processes	GO:0016054	organic acid catabolic process	-6.2	2	5.4	-4.1		GO Biological Processes	GO:0003006	developmental process involved in reproduction	-4.4	1.4	4.2	-2.4
GO Biological Processes	GO:0000070	mitotic sister chromatid segregation	-6.2	2.2	5.5	-4.1		GO Biological Processes	GO:0051223	regulation of protein transport	-4.4	1.5	4.2	-2.4
GO Biological Processes	GO:0072593	reactive oxygen species metabolic process	-6.1	1.8	5.3	-4.1		Reactome Gene Sets	R-MMU-422475	Axon guidance	-4.4	1.8	4.4	-2.4
GO Biological Processes	GO:0007059	chromosome segregation	-6.1	1.8	5.3	-4.1		GO Biological Processes	GO:1903531	negative regulation of secretion by cell	-4.4	1.9	4.4	-2.4
GO Biological Processes	GO:0046434	organophosphate catabolic process	-6.1	2	5.4	-4.1		Reactome Gene Sets	R-MMU-112316	Neuronal System	-4.4	1.7	4.4	-2.3
GO Biological Processes	GO:0006979	response to oxidative stress	-6.1	1.7	5.2	-4		GO Biological Processes	GO:0010564	regulation of cell cycle process	-4.4	1.5	4.3	-2.3
GO Biological Processes	GO:0015672	monovalent inorganic cation transport	-6.1	1.6	5.2	-4		GO Biological Processes	GO:0001933	negative regulation of protein phosphorylation	-4.4	1.6	4.3	-2.3
GO Biological Processes	GO:0032787	monocarboxylic acid metabolic process	-6	1.5	5.1	-4		Reactome Gene Sets	R-MMU-6794361	Neurexins and neuroligins	-4.4	3.7	5.1	-2.3
GO Biological Processes	GO:0019395	fatty acid oxidation	-6	2.5	5.6	-4		GO Biological Processes	GO:0001944	vasculature development	-4.4	1.5	4.2	-2.3
GO Biological Processes	GO:0042274	ribosomal small subunit biogenesis	-6	2.8	5.7	-4		GO Biological Processes	GO:0002064	epithelial cell development	-4.4	1.8	4.4	-2.3
GO Biological Processes	GO:0006520	cellular amino acid metabolic process	-6	1.8	5.3	-3.9		KEGG Pathway	mmu04919	Thyroid hormone signaling pathway	-4.4	2.3	4.6	-2.3
GO Biological Processes	GO:0000819	sister chromatid segregation	-6	2	5.3	-3.9		GO Biological Processes	GO:0007018	microtubule-based movement	-4.4	1.8	4.4	-2.3
KEGG Pathway	mmu04142	Lysosome	-5.9	2.3	5.4	-3.8		GO Biological Processes	GO:0051271	negative regulation of cellular component movement	-4.4	1.7	4.3	-2.3
GO Biological Processes	GO:0006122	mitochondrial electron transport, ubiquinol to cytochrome c	-5.8	5.8	6.4	-3.8		GO Biological Processes	GO:0002009	morphogenesis of an epithelium	-4.4	1.5	4.2	-2.3
KEGG Pathway	M00009	Citrate cycle (TCA cycle, Krebs cycle)	-5.8	4.2	6.1	-3.8		GO Biological Processes	GO:0060972	left/right pattern formation	-4.3	4.2	5.2	-2.3
KEGG Pathway	mmu_M00009	Citrate cycle (TCA cycle, Krebs cycle)	-5.8	4.2	6.1	-3.8		GO Biological Processes	GO:0018022	peptidyl-lysine methylation	-4.3	2.2	4.6	-2.3
GO Biological Processes	GO:0034440	lipid oxidation	-5.8	2.4	5.4	-3.8		GO Biological Processes	GO:0050708	regulation of protein secretion	-4.3	1.6	4.2	-2.3
GO Biological Processes	GO:1901136	carbohydrate derivative catabolic process	-5.8	2.3	5.4	-3.7		GO Biological Processes	GO:0030335	positive regulation of cell migration	-4.3	1.5	4.2	-2.3
GO Biological Processes	GO:0010823	negative regulation of mitochondrion organization	-5.7	3	5.6	-3.7		GO Biological Processes	GO:0009912	auditory receptor cell fate commitment	-4.3	8.4	6	-2.3
GO Biological Processes	GO:0097190	apoptotic signaling pathway	-5.7	1.5	5	-3.7		GO Biological Processes	GO:0060120	inner ear receptor cell fate commitment	-4.3	8.4	6	-2.3
Reactome Gene Sets	R-MMU-71387	Metabolism of carbohydrates	-5.7	1.9	5.1	-3.7		GO Biological Processes	GO:0098662	inorganic cation transmembrane transport	-4.3	1.5	4.2	-2.3
GO Biological Processes	GO:0008637	apoptotic mitochondrial changes	-5.7	2.3	5.3	-3.7		GO Biological Processes	GO:0070588	calcium ion transmembrane transport	-4.3	1.8	4.3	-2.3
GO Biological Processes	GO:2001243	negative regulation of intrinsic apoptotic signaling pathway	-5.6	2.4	5.3	-3.6		GO Biological Processes	GO:0045787	positive regulation of cell cycle	-4.3	1.7	4.3	-2.3
GO Biological Processes	GO:2001242	regulation of intrinsic apoptotic signaling pathway	-5.6	2	5.2	-3.6		GO Biological Processes	GO:0051129	negative regulation of cellular component organization	-4.3	1.4	4.1	-2.2
KEGG Pathway	mmu05014	Amyotrophic lateral sclerosis (ALS)	-5.5	3	5.5	-3.5		GO Biological Processes	GO:0010921	regulation of phosphatase activity	-4.3	2.2	4.5	-2.2
GO Biological Processes	GO:0016072	rRNA metabolic process	-5.5	1.9	5	-3.5		GO Biological Processes	GO:1902414	protein localization to cell junction	-4.3	5.1	5.4	-2.2
GO Biological Processes	GO:0071616	acyl-CoA biosynthetic process	-5.5	4.1	5.9	-3.5		GO Biological Processes	GO:0048813	dendrite morphogenesis	-4.3	2	4.4	-2.2
GO Biological Processes	GO:0035384	thioester biosynthetic process	-5.5	4.1	5.9	-3.5		GO Biological Processes	GO:0099068	postsynapse assembly	-4.2	3.6	5	-2.2
GO Biological Processes	GO:0046394	carboxylic acid biosynthetic process	-5.5	1.7	4.9	-3.5		GO Biological Processes	GO:0014070	response to organic cyclic compound	-4.2	1.4	4.1	-2.2
GO Biological Processes	GO:0016053	organic acid biosynthetic process	-5.5	1.7	4.9	-3.5		GO Biological Processes	GO:0009755	hormone-mediated signaling pathway	-4.2	2.1	4.4	-2.2
GO Biological Processes	GO:0046902	regulation of mitochondrial membrane permeability	-5.4	2.9	5.4	-3.4		GO Biological Processes	GO:0032869	cellular response to insulin stimulus	-4.2	1.9	4.3	-2.2
KEGG Pathway	mmu01210	2-Oxocarboxylic acid metabolism	-5.4	4.5	5.9	-3.4		GO Biological Processes	GO:0016571	histone methylation	-4.2	2.1	4.4	-2.2
KEGG Pathway	mmu00071	Fatty acid degradation	-5.4	3	5.4	-3.4		GO Biological Processes	GO:0001568	blood vessel development	-4.2	1.5	4.1	-2.2
GO Biological Processes	GO:0008610	lipid biosynthetic process	-5.3	1.5	4.8	-3.4		GO Biological Processes	GO:0071417	cellular response to organonitrogen compound	-4.2	1.5	4.1	-2.2
GO Biological Processes	GO:0009066	aspartate family amino acid metabolic process	-5.3	3.2	5.5	-3.3		GO Biological Processes	GO:0030325	adrenal gland development	-4.2	4.1	5.1	-2.2
GO Biological Processes	GO:0006635	fatty acid beta-oxidation	-5.3	2.7	5.3	-3.3		GO Biological Processes	GO:1905475	regulation of protein localization to membrane	-4.2	2	4.3	-2.2
GO Biological Processes	GO:0098660	inorganic ion transmembrane transport	-5.3	1.5	4.7	-3.3		GO Biological Processes	GO:0030336	negative regulation of cell migration	-4.1	1.8	4.2	-2.2
Reactome Gene Sets	R-MMU-196854	Metabolism of vitamins and cofactors	-5.3	2	4.9	-3.3		GO Biological Processes	GO:0008593	regulation of Notch signaling pathway	-4.1	2.5	4.5	-2.2
GO Biological Processes	GO:0008608	attachment of spindle microtubules to kinetochore	-5.2	3.6	5.5	-3.2		GO Biological Processes	GO:0045682	regulation of epidermis development	-4.1	2.5	4.5	-2.2
GO Biological Processes	GO:0046496	nicotinamide nucleotide metabolic process	-5.2	2	4.9	-3.2		GO Biological Processes	GO:0051298	centrosome duplication	-4.1	2.7	4.6	-2.1
GO Biological Processes	GO:0031647	regulation of protein stability	-5.2	1.7	4.8	-3.2		GO Biological Processes	GO:0060828	regulation of canonical Wnt signaling pathway	-4.1	1.9	4.3	-2.1
GO Biological Processes	GO:0051129	negative regulation of cellular component organization	-5.2	1.4	4.6	-3.2		GO Biological Processes	GO:0010038	response to metal ion	-4.1	1.8	4.2	-2.1
GO Biological Processes	GO:0009311	oligosaccharide metabolic process	-5.2	3.4	5.5	-3.2		GO Biological Processes	GO:0010976	positive regulation of neuron projection development	-4.1	1.7	4.1	-2.1
KEGG Pathway	mmu00480	Glutathione metabolism	-5.2	2.8	5.2	-3.2		GO Biological Processes	GO:0099003	vesicle-mediated transport in synapse	-4.1	1.8	4.2	-2.1
GO Biological Processes	GO:0006687	glycosphingolipid metabolic process	-5.2	3.2	5.4	-3.2		GO Biological Processes	GO:0031400	negative regulation of protein modification process	-4.1	1.5	4.1	-2.1
GO Biological Processes	GO:0072524	pyridine-containing compound metabolic process	-5.1	2	4.9	-3.1		GO Biological Processes	GO:0007635	chemosensory behavior	-4.1	4.3	5.1	-2.1
GO Biological Processes	GO:0033539	fatty acid beta-oxidation using acyl-CoA dehydrogenase	-5.1	5.7	5.9	-3.1		GO Biological Processes	GO:0120032	regulation of plasma membrane bounded cell projection assembly	-4	1.9	4.3	-2.1
GO Biological Processes	GO:0046514	ceramide catabolic process	-5.1	4.3	5.6	-3.1		GO Biological Processes	GO:0071333	cellular response to glucose stimulus	-4	2.1	4.3	-2.1
GO Biological Processes	GO:0019362	pyridine nucleotide metabolic process	-5.1	2	4.9	-3.1		GO Biological Processes	GO:0009895	negative regulation of catabolic process	-4	1.7	4.1	-2.1
GO Biological Processes	GO:0098655	cation transmembrane transport	-5	1.4	4.5	-3.1		GO Biological Processes	GO:1904889	regulation of excitatory synapse assembly	-4	4.8	5.1	-2.1
Reactome Gene Sets	R-MMU-3299685	Detoxification of Reactive Oxygen Species	-5	3.5	5.4	-3.1		KEGG Pathway	mmu04024	cAMP signaling pathway	-4	1.9	4.2	-2.1
GO Biological Processes	GO:0006099	tricarboxylic acid cycle	-5	3.5	5.4	-3.1		GO Biological Processes	GO:1902903	regulation of supramolecular fiber organization	-4	1.7	4.1	-2
GO Biological Processes	GO:0098662	inorganic cation transmembrane transport	-5	1.5	4.6	-3.1		GO Biological Processes	GO:1904062	regulation of cation transmembrane transport	-4	1.7	4.1	-2
GO Biological Processes	GO:0062012	regulation of small molecule metabolic process	-4.9	1.6	4.6	-3		GO Biological Processes	GO:0008213	protein alkylation	-4	2	4.2	-2
GO Biological Processes	GO:1901607	alpha-amino acid biosynthetic process	-4.9	2.7	5	-3		GO Biological Processes	GO:0006479	protein methylation	-4	2	4.2	-2
GO Biological Processes	GO:0051260	protein homooligomerization	-4.9	1.6	4.6	-3		GO Biological Processes	GO:1900078	positive regulation of cellular response to insulin stimulus	-4	3.9	4.9	-2
KEGG Pathway	mmu00270	Cysteine and methionine metabolism	-4.9	2.9	5.1	-2.9		GO Biological Processes	GO:1904893	negative regulation of STAT cascade	-4	3.9	4.9	-2
KEGG Pathway	mmu04975	Fat digestion and absorption	-4.8	3.1	5.1	-2.9		GO Biological Processes	GO:0030856	regulation of epithelial cell differentiation	-4	2.1	4.3	-2
KEGG Pathway	mmu00020	Citrate cycle (TCA cycle)	-4.8	3.4	5.2	-2.9		GO Biological Processes	GO:0035050	embryonic heart tube development	-4	2.5	4.4	-2
GO Biological Processes	GO:0006101	citrate metabolic process	-4.8	3.4	5.2	-2.9		GO Biological Processes	GO:0003158	endothelium development	-4	2.2	4.3	-2
Reactome Gene Sets	R-MMU-69273	Cyclin A/B1/B2 associated events during G2/M transition	-4.8	4.1	5.4	-2.9		GO Biological Processes	GO:0060491	regulation of cell projection assembly	-4	1.9	4.2	-2
GO Biological Processes	GO:0016052	carbohydrate catabolic process	-4.8	2	4.7	-2.9		GO Biological Processes	GO:0048871	multicellular organismal homeostasis	-3.9	1.5	4	-2
GO Biological Processes	GO:0009100	glycoprotein metabolic process	-4.8	1.6	4.5	-2.9		GO Biological Processes	GO:2000146	negative regulation of cell motility	-3.9	1.7	4.1	-2
Reactome Gene Sets	R-MMU-428157	Sphingolipid metabolism	-4.8	2.4	4.9	-2.8		GO Biological Processes	GO:0071331	cellular response to hexose stimulus	-3.9	2.1	4.2	-2
GO Biological Processes	GO:0043467	regulation of generation of precursor metabolites and energy	-4.7	2.1	4.7	-2.8		GO Biological Processes	GO:0070507	regulation of microtubule cytoskeleton organization	-3.9	1.9	4.1	-2
GO Biological Processes	GO:0048285	organelle fission	-4.7	1.5	4.4	-2.8		GO Biological Processes	GO:0030155	regulation of cell adhesion	-3.9	1.4	3.9	-2
GO Biological Processes	GO:0006140	regulation of nucleotide metabolic process	-4.7	2.2	4.7	-2.7		GO Biological Processes	GO:0035773	insulin secretion involved in cellular response to glucose stimulus	-3.9	2.4	4.4	-2
Reactome Gene Sets	R-MMU-194840	Rho GTPase cycle	-4.7	2.1	4.7	-2.7		GO Biological Processes	GO:0010638	positive regulation of organelle organization	-3.9	1.5	3.9	-2
GO Biological Processes	GO:0042391	regulation of membrane potential	-4.6	1.5	4.4	-2.7		GO Biological Processes	GO:0060996	dendritic spine development	-3.9	2.2	4.2	-2
GO Biological Processes	GO:0030149	sphingolipid catabolic process	-4.6	3.5	5.2	-2.7		GO Biological Processes	GO:0001525	angiogenesis	-3.9	1.5	4	-2
GO Biological Processes	GO:0006665	sphingolipid metabolic process	-4.6	2.1	4.7	-2.7		GO Biological Processes	GO:0035176	social behavior	-3.9	2.9	4.5	-2
GO Biological Processes	GO:0098813	nuclear chromosome segregation	-4.6	1.7	4.5	-2.7		GO Biological Processes	GO:0051703	intraspecies interaction between organisms	-3.9	2.9	4.5	-2
GO Biological Processes	GO:0051604	protein maturation	-4.6	1.7	4.4	-2.7		GO Biological Processes	GO:0034968	histone lysine methylation	-3.9	2.2	4.3	-2
KEGG Pathway	mmu00330	Arginine and proline metabolism	-4.6	2.8	4.9	-2.7		GO Biological Processes	GO:0071326	cellular response to monosaccharide stimulus	-3.9	2.1	4.2	-2
Reactome Gene Sets	R-MMU-446219	Synthesis of substrates in N-glycan biosythesis	-4.6	2.6	4.8	-2.7		Reactome Gene Sets	R-MMU-5620912	Anchoring of the basal body to the plasma membrane	-3.9	2.3	4.3	-2
GO Biological Processes	GO:1900542	regulation of purine nucleotide metabolic process	-4.6	2.2	4.7	-2.7		GO Biological Processes	GO:0006281	DNA repair	-3.9	1.5	3.9	-2
GO Biological Processes	GO:0019318	hexose metabolic process	-4.6	1.8	4.5	-2.7		GO Biological Processes	GO:0097120	receptor localization to synapse	-3.9	2.6	4.4	-2
GO Biological Processes	GO:0008652	cellular amino acid biosynthetic process	-4.5	2.6	4.8	-2.6		GO Biological Processes	GO:0007623	circadian rhythm	-3.8	1.9	4.1	-1.9
GO Biological Processes	GO:0005996	monosaccharide metabolic process	-4.5	1.7	4.4	-2.6		GO Biological Processes	GO:0045814	negative regulation of gene expression, epigenetic	-3.8	2.4	4.3	-1.9
Reactome Gene Sets	R-MMU-446193	Biosynthesis of the N-glycan precursor (dolichol lipid-linked oligosaccharide, LLO) and transfer to	-4.5	2.5	4.7	-2.6		GO Biological Processes	GO:0032231	regulation of actin filament bundle assembly	-3.8	2.3	4.2	-1.9
GO Biological Processes	GO:0000281	mitotic cytokinesis	-4.5	2.5	4.7	-2.6		GO Biological Processes	GO:1901699	cellular response to nitrogen compound	-3.8	1.5	3.9	-1.9
GO Biological Processes	GO:0006066	alcohol metabolic process	-4.5	1.6	4.4	-2.6		GO Biological Processes	GO:0006469	negative regulation of protein kinase activity	-3.8	1.9	4.1	-1.9
GO Biological Processes	GO:0010821	regulation of mitochondrion organization	-4.5	2	4.5	-2.6		GO Biological Processes	GO:0099150	regulation of postsynaptic specialization assembly	-3.8	4.5	4.9	-1.9
Reactome Gene Sets	R-MMU-69620	Cell Cycle Checkpoints	-4.5	1.8	4.4	-2.6		GO Biological Processes	GO:0150052	regulation of postsynapse assembly	-3.8	4.5	4.9	-1.9
GO Biological Processes	GO:0090559	regulation of membrane permeability	-4.4	2.5	4.7	-2.5		GO Biological Processes	GO:0072148	epithelial cell fate commitment	-3.8	4.5	4.9	-1.9
GO Biological Processes	GO:0006631	fatty acid metabolic process	-4.4	1.6	4.3	-2.5		GO Biological Processes	GO:0198738	cell-cell signaling by wnt	-3.8	1.6	3.9	-1.9
GO Biological Processes	GO:0034599	cellular response to oxidative stress	-4.4	1.7	4.3	-2.5		GO Biological Processes	GO:0045604	regulation of epidermal cell differentiation	-3.8	2.8	4.4	-1.9
GO Biological Processes	GO:0019915	lipid storage	-4.4	2.4	4.7	-2.5		GO Biological Processes	GO:1903753	negative regulation of p38MAPK cascade	-3.8	7.2	5.5	-1.9
Reactome Gene Sets	R-MMU-3700989	Transcriptional Regulation by TP53	-4.4	1.7	4.4	-2.5		GO Biological Processes	GO:0040013	negative regulation of locomotion	-3.8	1.6	3.9	-1.9
Reactome Gene Sets	R-MMU-174143	APC/C-mediated degradation of cell cycle proteins	-4.4	2.3	4.6	-2.5		GO Biological Processes	GO:0046683	response to organophosphorus	-3.8	2.3	4.2	-1.9
Reactome Gene Sets	R-MMU-453276	Regulation of mitotic cell cycle	-4.4	2.3	4.6	-2.5		GO Biological Processes	GO:0090278	negative regulation of peptide hormone secretion	-3.8	2.6	4.3	-1.9
Reactome Gene Sets	R-MMU-446203	Asparagine N-linked glycosylation	-4.4	1.7	4.3	-2.5		GO Biological Processes	GO:0051648	vesicle localization	-3.8	1.7	4	-1.9
GO Biological Processes	GO:0006643	membrane lipid metabolic process	-4.4	1.9	4.4	-2.5		GO Biological Processes	GO:0034333	adherens junction assembly	-3.7	2.4	4.2	-1.9
Reactome Gene Sets	R-MMU-69656	Cyclin A:Cdk2-associated events at S phase entry	-4.3	3.7	5	-2.5		GO Biological Processes	GO:0002088	lens development in camera-type eye	-3.7	2.4	4.2	-1.9
GO Biological Processes	GO:0009154	purine ribonucleotide catabolic process	-4.3	3.7	5	-2.5		GO Biological Processes	GO:0031644	regulation of neurological system process	-3.7	1.9	4	-1.9
GO Biological Processes	GO:0009261	ribonucleotide catabolic process	-4.3	3.7	5	-2.5		GO Biological Processes	GO:2000147	positive regulation of cell motility	-3.7	1.5	3.8	-1.9
KEGG Pathway	mmu01212	Fatty acid metabolism	-4.3	2.7	4.7	-2.5		GO Biological Processes	GO:0046777	protein autophosphorylation	-3.7	1.8	4	-1.8
GO Biological Processes	GO:0034470	ncRNA processing	-4.3	1.6	4.2	-2.4		GO Biological Processes	GO:0032868	response to insulin	-3.7	1.8	4	-1.8
GO Biological Processes	GO:0022618	ribonucleoprotein complex assembly	-4.3	1.7	4.3	-2.4		Reactome Gene Sets	R-MMU-9006934	Signaling by Receptor Tyrosine Kinases	-3.7	1.6	3.9	-1.8
KEGG Pathway	mmu_M00087	beta-Oxidation	-4.3	4.8	5.3	-2.4		Reactome Gene Sets	R-MMU-5610787	Hedgehog 'off' state	-3.7	2.8	4.3	-1.8
KEGG Pathway	M00087	beta-Oxidation	-4.3	4.8	5.3	-2.4		GO Biological Processes	GO:1903539	protein localization to postsynaptic membrane	-3.7	2.8	4.3	-1.8
GO Biological Processes	GO:1903578	regulation of ATP metabolic process	-4.3	2.2	4.5	-2.4		GO Biological Processes	GO:1905515	non-motile cilium assembly	-3.7	2.6	4.3	-1.8
Reactome Gene Sets	R-MMU-156590	Glutathione conjugation	-4.3	3.5	4.9	-2.4		GO Biological Processes	GO:0010769	regulation of cell morphogenesis involved in differentiation	-3.7	1.6	3.9	-1.8
Reactome Gene Sets	R-MMU-194315	Signaling by Rho GTPases	-4.3	1.5	4.2	-2.4		GO Biological Processes	GO:0051272	positive regulation of cellular component movement	-3.7	1.5	3.8	-1.8
GO Biological Processes	GO:0051259	protein complex oligomerization	-4.3	1.4	4.1	-2.4		GO Biological Processes	GO:0048514	blood vessel morphogenesis	-3.7	1.4	3.8	-1.8
GO Biological Processes	GO:0042180	cellular ketone metabolic process	-4.3	1.8	4.3	-2.4		GO Biological Processes	GO:0098609	cell-cell adhesion	-3.7	1.4	3.7	-1.8
GO Biological Processes	GO:0071826	ribonucleoprotein complex subunit organization	-4.2	1.7	4.2	-2.4		GO Biological Processes	GO:0008643	carbohydrate transport	-3.7	2	4	-1.8
GO Biological Processes	GO:0009101	glycoprotein biosynthetic process	-4.2	1.7	4.2	-2.4		GO Biological Processes	GO:0098660	inorganic ion transmembrane transport	-3.6	1.4	3.7	-1.8
Reactome Gene Sets	R-MMU-2500257	Resolution of Sister Chromatid Cohesion	-4.2	2	4.4	-2.4		GO Biological Processes	GO:0016055	Wnt signaling pathway	-3.6	1.5	3.8	-1.8
Reactome Gene Sets	R-MMU-141444	Amplification of signal from unattached kinetochores via a MAD2 inhibitory signal	-4.2	2.2	4.4	-2.4		GO Biological Processes	GO:0090277	positive regulation of peptide hormone secretion	-3.6	2.1	4	-1.8
Reactome Gene Sets	R-MMU-141424	Amplification of signal from the kinetochores	-4.2	2.2	4.4	-2.4		GO Biological Processes	GO:0001822	kidney development	-3.6	1.7	3.9	-1.8
GO Biological Processes	GO:0006664	glycolipid metabolic process	-4.2	2.3	4.5	-2.3		GO Biological Processes	GO:0032970	regulation of actin filament-based process	-3.6	1.6	3.8	-1.8
GO Biological Processes	GO:0007264	small GTPase mediated signal transduction	-4.2	1.5	4.1	-2.3		GO Biological Processes	GO:0048608	reproductive structure development	-3.6	1.5	3.8	-1.8
Reactome Gene Sets	R-MMU-15869	Metabolism of nucleotides	-4.1	2.1	4.4	-2.3		Reactome Gene Sets	R-MMU-5358351	Signaling by Hedgehog	-3.6	2.3	4.1	-1.8
GO Biological Processes	GO:0009062	fatty acid catabolic process	-4.1	2.2	4.4	-2.3		GO Biological Processes	GO:0048592	eye morphogenesis	-3.6	1.9	3.9	-1.8
GO Biological Processes	GO:0050821	protein stabilization	-4.1	1.8	4.2	-2.3		GO Biological Processes	GO:0007219	Notch signaling pathway	-3.6	1.9	3.9	-1.8
GO Biological Processes	GO:0046466	membrane lipid catabolic process	-4.1	3.2	4.7	-2.3		GO Biological Processes	GO:0033673	negative regulation of kinase activity	-3.6	1.8	3.9	-1.8
GO Biological Processes	GO:1903509	liposaccharide metabolic process	-4.1	2.3	4.4	-2.3		GO Biological Processes	GO:0014074	response to purine-containing compound	-3.6	2.2	4	-1.8
GO Biological Processes	GO:0006672	ceramide metabolic process	-4.1	2.3	4.4	-2.3		GO Biological Processes	GO:0008544	epidermis development	-3.6	1.6	3.8	-1.7
GO Biological Processes	GO:0006195	purine nucleotide catabolic process	-4.1	3.3	4.8	-2.3		GO Biological Processes	GO:0018205	peptidyl-lysine modification	-3.6	1.6	3.8	-1.7
GO Biological Processes	GO:0051881	regulation of mitochondrial membrane potential	-4.1	2.3	4.4	-2.3		GO Biological Processes	GO:0097061	dendritic spine organization	-3.6	2.3	4.1	-1.7
GO Biological Processes	GO:0072332	intrinsic apoptotic signaling pathway by p53 class mediator	-4.1	2.3	4.4	-2.3		GO Biological Processes	GO:0044089	positive regulation of cellular component biogenesis	-3.6	1.5	3.7	-1.7
KEGG Pathway	mmu04260	Cardiac muscle contraction	-4.1	2.3	4.4	-2.3		GO Biological Processes	GO:0040017	positive regulation of locomotion	-3.6	1.5	3.7	-1.7
GO Biological Processes	GO:0097193	intrinsic apoptotic signaling pathway	-4.1	1.6	4.1	-2.3		GO Biological Processes	GO:0000722	telomere maintenance via recombination	-3.5	4.7	4.8	-1.7
Reactome Gene Sets	R-MMU-2262752	Cellular responses to stress	-4.1	1.6	4.1	-2.3		GO Biological Processes	GO:0003128	heart field specification	-3.5	4.7	4.8	-1.7
GO Biological Processes	GO:1901615	organic hydroxy compound metabolic process	-4.1	1.5	4	-2.3		GO Biological Processes	GO:0031329	regulation of cellular catabolic process	-3.5	1.4	3.7	-1.7
GO Biological Processes	GO:1901361	organic cyclic compound catabolic process	-4.1	1.5	4	-2.3		GO Biological Processes	GO:0051705	multi-organism behavior	-3.5	2.4	4.1	-1.7
GO Biological Processes	GO:0006749	glutathione metabolic process	-4	2.5	4.5	-2.2		GO Biological Processes	GO:0040029	regulation of gene expression, epigenetic	-3.5	1.7	3.8	-1.7
GO Biological Processes	GO:0044770	cell cycle phase transition	-4	1.5	4	-2.2		GO Biological Processes	GO:0070848	response to growth factor	-3.5	1.4	3.7	-1.7
GO Biological Processes	GO:0017185	peptidyl-lysine hydroxylation	-4	5.8	5.3	-2.2		GO Biological Processes	GO:0051048	negative regulation of secretion	-3.5	1.7	3.8	-1.7
GO Biological Processes	GO:0009132	nucleoside diphosphate metabolic process	-4	2	4.2	-2.2		GO Biological Processes	GO:0060914	heart formation	-3.5	3.5	4.4	-1.7
KEGG Pathway	M00011	Citrate cycle, second carbon oxidation, 2-oxoglutarate => oxaloacetate	-4	4.5	5	-2.2		GO Biological Processes	GO:0010586	miRNA metabolic process	-3.5	3.5	4.4	-1.7
GO Biological Processes	GO:0046479	glycosphingolipid catabolic process	-4	4.5	5	-2.2		Reactome Gene Sets	R-MMU-380284	Loss of proteins required for interphase microtubule organization from the centrosome	-3.5	2.5	4.1	-1.7
KEGG Pathway	mmu_M00011	Citrate cycle, second carbon oxidation, 2-oxoglutarate => oxaloacetate	-4	4.5	5	-2.2		Reactome Gene Sets	R-MMU-380259	Loss of Nlp from mitotic centrosomes	-3.5	2.5	4.1	-1.7
GO Biological Processes	GO:0072350	tricarboxylic acid metabolic process	-4	2.9	4.5	-2.2		GO Biological Processes	GO:0050885	neuromuscular process controlling balance	-3.5	2.5	4.1	-1.7
GO Biological Processes	GO:1902229	regulation of intrinsic apoptotic signaling pathway in response to DNA damage	-4	2.9	4.5	-2.2		GO Biological Processes	GO:1904659	glucose transmembrane transport	-3.5	2.2	4	-1.7
GO Biological Processes	GO:0031329	regulation of cellular catabolic process	-3.9	1.4	3.9	-2.1		GO Biological Processes	GO:0030048	actin filament-based movement	-3.5	2.2	4	-1.7
GO Biological Processes	GO:0010942	positive regulation of cell death	-3.9	1.4	3.9	-2.1		GO Biological Processes	GO:1900006	positive regulation of dendrite development	-3.5	2.2	4	-1.7
GO Biological Processes	GO:0006084	acetyl-CoA metabolic process	-3.9	3.1	4.6	-2.1		GO Biological Processes	GO:0051348	negative regulation of transferase activity	-3.5	1.7	3.8	-1.7
GO Biological Processes	GO:0097345	mitochondrial outer membrane permeabilization	-3.9	3.2	4.6	-2.1		GO Biological Processes	GO:0007276	gamete generation	-3.5	1.4	3.7	-1.7
Reactome Gene Sets	R-MMU-5663220	RHO GTPases Activate Formins	-3.9	1.9	4.1	-2.1		GO Biological Processes	GO:0043618	regulation of transcription from RNA polymerase II promoter in response to stress	-3.5	2.8	4.2	-1.7
GO Biological Processes	GO:0016999	antibiotic metabolic process	-3.9	1.9	4.1	-2.1		GO Biological Processes	GO:0060173	limb development	-3.5	1.8	3.8	-1.7
GO Biological Processes	GO:0032091	negative regulation of protein binding	-3.9	2.1	4.2	-2.1		GO Biological Processes	GO:0048736	appendage development	-3.5	1.8	3.8	-1.7
GO Biological Processes	GO:0010639	negative regulation of organelle organization	-3.8	1.5	3.9	-2.1		GO Biological Processes	GO:0019932	second-messenger-mediated signaling	-3.5	1.5	3.7	-1.7
KEGG Pathway	mmu00511	Other glycan degradation	-3.8	3.9	4.7	-2		GO Biological Processes	GO:0009791	post-embryonic development	-3.5	2	3.9	-1.7
GO Biological Processes	GO:0006085	acetyl-CoA biosynthetic process	-3.8	3.9	4.7	-2		GO Biological Processes	GO:0061458	reproductive system development	-3.5	1.5	3.7	-1.7
KEGG Pathway	mmu00010	Glycolysis / Gluconeogenesis	-3.8	2.4	4.2	-2		GO Biological Processes	GO:0099504	synaptic vesicle cycle	-3.5	1.8	3.8	-1.7
GO Biological Processes	GO:0019751	polyol metabolic process	-3.8	2	4.1	-2		GO Biological Processes	GO:0098534	centriole assembly	-3.5	3	4.3	-1.7
Reactome Gene Sets	R-MMU-8953897	Cellular responses to external stimuli	-3.8	1.5	3.9	-2		GO Biological Processes	GO:0045747	positive regulation of Notch signaling pathway	-3.5	3	4.3	-1.7
GO Biological Processes	GO:1902686	mitochondrial outer membrane permeabilization involved in programmed cell death	-3.8	3	4.4	-2		GO Biological Processes	GO:0032386	regulation of intracellular transport	-3.5	1.5	3.7	-1.7
GO Biological Processes	GO:0061077	chaperone-mediated protein folding	-3.8	2.5	4.3	-2		GO Biological Processes	GO:0106027	neuron projection organization	-3.5	2.2	4	-1.7
GO Biological Processes	GO:0019216	regulation of lipid metabolic process	-3.8	1.5	3.9	-2		GO Biological Processes	GO:0043269	regulation of ion transport	-3.5	1.4	3.6	-1.7
GO Biological Processes	GO:0071459	protein localization to chromosome, centromeric region	-3.8	3.5	4.6	-2		GO Biological Processes	GO:0008645	hexose transmembrane transport	-3.5	2.1	3.9	-1.7
GO Biological Processes	GO:0009067	aspartate family amino acid biosynthetic process	-3.8	3.5	4.6	-2		GO Biological Processes	GO:1903076	regulation of protein localization to plasma membrane	-3.5	2.1	3.9	-1.7
Reactome Gene Sets	R-MMU-69202	Cyclin E associated events during G1/S transition	-3.8	3.5	4.6	-2		KEGG Pathway	mmu04931	Insulin resistance	-3.5	2.1	3.9	-1.7
GO Biological Processes	GO:0061082	myeloid leukocyte cytokine production	-3.7	3.1	4.5	-2		GO Biological Processes	GO:0043086	negative regulation of catalytic activity	-3.5	1.4	3.6	-1.7
GO Biological Processes	GO:0010269	response to selenium ion	-3.7	6.5	5.2	-2		GO Biological Processes	GO:0018105	peptidyl-serine phosphorylation	-3.4	1.6	3.7	-1.7
GO Biological Processes	GO:0009135	purine nucleoside diphosphate metabolic process	-3.7	2	4.1	-2		GO Biological Processes	GO:0048593	camera-type eye morphogenesis	-3.4	2	3.9	-1.7
GO Biological Processes	GO:0006165	nucleoside diphosphate phosphorylation	-3.7	2	4.1	-2		GO Biological Processes	GO:0110053	regulation of actin filament organization	-3.4	1.7	3.7	-1.7
GO Biological Processes	GO:0009179	purine ribonucleoside diphosphate metabolic process	-3.7	2	4.1	-2		GO Biological Processes	GO:0099072	regulation of postsynaptic membrane neurotransmitter receptor levels	-3.4	2.2	4	-1.7
GO Biological Processes	GO:0043068	positive regulation of programmed cell death	-3.7	1.4	3.8	-1.9		GO Biological Processes	GO:0072001	renal system development	-3.4	1.6	3.7	-1.7
GO Biological Processes	GO:0046031	ADP metabolic process	-3.7	2.1	4.1	-1.9		GO Biological Processes	GO:0035640	exploration behavior	-3.4	3.4	4.3	-1.6
GO Biological Processes	GO:1902165	regulation of intrinsic apoptotic signaling pathway in response to DNA damage by p53 class mediator	-3.7	4.2	4.7	-1.9		Reactome Gene Sets	R-MMU-352230	Amino acid transport across the plasma membrane	-3.4	3.4	4.3	-1.6
GO Biological Processes	GO:0019377	glycolipid catabolic process	-3.7	4.2	4.7	-1.9		GO Biological Processes	GO:0060287	epithelial cilium movement involved in determination of left/right asymmetry	-3.4	6.3	5	-1.6
GO Biological Processes	GO:0070071	proton-transporting two-sector ATPase complex assembly	-3.7	4.2	4.7	-1.9		GO Biological Processes	GO:0071277	cellular response to calcium ion	-3.4	2.4	4	-1.6
GO Biological Processes	GO:1905710	positive regulation of membrane permeability	-3.7	2.8	4.3	-1.9		GO Biological Processes	GO:0046426	negative regulation of JAK-STAT cascade	-3.4	3.6	4.4	-1.6
GO Biological Processes	GO:1902108	regulation of mitochondrial membrane permeability involved in apoptotic process	-3.7	2.8	4.3	-1.9		GO Biological Processes	GO:0007160	cell-matrix adhesion	-3.4	1.8	3.7	-1.6
GO Biological Processes	GO:0061640	cytoskeleton-dependent cytokinesis	-3.7	2.1	4.1	-1.9		GO Biological Processes	GO:0035480	regulation of Notch signaling pathway involved in heart induction	-3.4	8.1	5.3	-1.6
GO Biological Processes	GO:1902850	microtubule cytoskeleton organization involved in mitosis	-3.7	1.9	4	-1.9		GO Biological Processes	GO:0045053	protein retention in Golgi apparatus	-3.4	8.1	5.3	-1.6
GO Biological Processes	GO:0016051	carbohydrate biosynthetic process	-3.7	1.7	3.9	-1.9		GO Biological Processes	GO:0035481	positive regulation of Notch signaling pathway involved in heart induction	-3.4	8.1	5.3	-1.6
Reactome Gene Sets	R-MMU-68882	Mitotic Anaphase	-3.7	1.8	3.9	-1.9		GO Biological Processes	GO:0003137	Notch signaling pathway involved in heart induction	-3.4	8.1	5.3	-1.6
GO Biological Processes	GO:0043065	positive regulation of apoptotic process	-3.7	1.4	3.7	-1.9		Reactome Gene Sets	R-MMU-5617833	Cilium Assembly	-3.4	1.8	3.7	-1.6
GO Biological Processes	GO:0034033	purine nucleoside bisphosphate biosynthetic process	-3.6	2.9	4.3	-1.9		GO Biological Processes	GO:0006342	chromatin silencing	-3.4	2.3	3.9	-1.6
GO Biological Processes	GO:0046320	regulation of fatty acid oxidation	-3.6	2.9	4.3	-1.9		GO Biological Processes	GO:0043149	stress fiber assembly	-3.3	2.1	3.9	-1.6
GO Biological Processes	GO:0033866	nucleoside bisphosphate biosynthetic process	-3.6	2.9	4.3	-1.9		GO Biological Processes	GO:0030038	contractile actin filament bundle assembly	-3.3	2.1	3.9	-1.6
GO Biological Processes	GO:0034030	ribonucleoside bisphosphate biosynthetic process	-3.6	2.9	4.3	-1.9		GO Biological Processes	GO:0015749	monosaccharide transmembrane transport	-3.3	2.1	3.8	-1.6
GO Biological Processes	GO:0043523	regulation of neuron apoptotic process	-3.6	1.6	3.8	-1.9		GO Biological Processes	GO:0120163	negative regulation of cold-induced thermogenesis	-3.3	2.8	4.1	-1.6
Reactome Gene Sets	R-MMU-2555396	Mitotic Metaphase and Anaphase	-3.6	1.8	3.9	-1.9		Reactome Gene Sets	R-MMU-400206	Regulation of lipid metabolism by Peroxisome proliferator-activated receptor alpha (PPARalpha)	-3.3	4.4	4.5	-1.6
GO Biological Processes	GO:0051988	regulation of attachment of spindle microtubules to kinetochore	-3.6	4.5	4.7	-1.9		GO Biological Processes	GO:0030900	forebrain development	-3.3	1.5	3.6	-1.6
GO Biological Processes	GO:0043457	regulation of cellular respiration	-3.6	3	4.3	-1.8		GO Biological Processes	GO:0007346	regulation of mitotic cell cycle	-3.3	1.5	3.6	-1.6
Reactome Gene Sets	R-MMU-4085001	Sialic acid metabolism	-3.6	3	4.3	-1.8		GO Biological Processes	GO:0018107	peptidyl-threonine phosphorylation	-3.3	2	3.8	-1.6
GO Biological Processes	GO:0046939	nucleotide phosphorylation	-3.6	2	4	-1.8		GO Biological Processes	GO:0033365	protein localization to organelle	-3.3	1.4	3.5	-1.6
Reactome Gene Sets	R-MMU-77286	mitochondrial fatty acid beta-oxidation of saturated fatty acids	-3.6	5.2	4.8	-1.8		GO Biological Processes	GO:0009798	axis specification	-3.3	2.2	3.9	-1.6
Reactome Gene Sets	R-MMU-70326	Glucose metabolism	-3.6	2.5	4.2	-1.8		GO Biological Processes	GO:0007264	small GTPase mediated signal transduction	-3.3	1.5	3.6	-1.6
GO Biological Processes	GO:0070125	mitochondrial translational elongation	-3.6	7.8	5.2	-1.8		GO Biological Processes	GO:0071900	regulation of protein serine/threonine kinase activity	-3.3	1.5	3.6	-1.6
CORUM	CORUM:440	Succinate dehydrogenase complex II, mitochondrial	-3.6	7.8	5.2	-1.8		GO Biological Processes	GO:0008306	associative learning	-3.3	2.1	3.8	-1.6
GO Biological Processes	GO:0044772	mitotic cell cycle phase transition	-3.6	1.5	3.7	-1.8		GO Biological Processes	GO:0001655	urogenital system development	-3.3	1.6	3.6	-1.6
GO Biological Processes	GO:0033674	positive regulation of kinase activity	-3.6	1.4	3.7	-1.8		Reactome Gene Sets	R-MMU-8854518	AURKA Activation by TPX2	-3.3	2.4	3.9	-1.6
GO Biological Processes	GO:0043549	regulation of kinase activity	-3.5	1.3	3.6	-1.8		GO Biological Processes	GO:0044270	cellular nitrogen compound catabolic process	-3.3	1.5	3.5	-1.6
GO Biological Processes	GO:0035966	response to topologically incorrect protein	-3.5	1.9	3.9	-1.8		GO Biological Processes	GO:0034219	carbohydrate transmembrane transport	-3.3	2.1	3.8	-1.6
GO Biological Processes	GO:0021782	glial cell development	-3.5	2	3.9	-1.8		GO Biological Processes	GO:1904951	positive regulation of establishment of protein localization	-3.3	1.5	3.5	-1.5
GO Biological Processes	GO:0007265	Ras protein signal transduction	-3.5	1.5	3.7	-1.8		GO Biological Processes	GO:0030866	cortical actin cytoskeleton organization	-3.3	2.9	4.1	-1.5
GO Biological Processes	GO:0070997	neuron death	-3.5	1.5	3.7	-1.8		GO Biological Processes	GO:0010639	negative regulation of organelle organization	-3.3	1.5	3.5	-1.5
GO Biological Processes	GO:0051640	organelle localization	-3.5	1.4	3.6	-1.8		GO Biological Processes	GO:0032465	regulation of cytokinesis	-3.2	2.3	3.9	-1.5
GO Biological Processes	GO:1903580	positive regulation of ATP metabolic process	-3.5	2.6	4.1	-1.8		GO Biological Processes	GO:1902017	regulation of cilium assembly	-3.2	2.5	3.9	-1.5
GO Biological Processes	GO:0006458	'de novo' protein folding	-3.5	2.8	4.2	-1.8		GO Biological Processes	GO:0061061	muscle structure development	-3.2	1.4	3.5	-1.5
GO Biological Processes	GO:0010664	negative regulation of striated muscle cell apoptotic process	-3.5	2.8	4.2	-1.8		GO Biological Processes	GO:1904375	regulation of protein localization to cell periphery	-3.2	2	3.7	-1.5
GO Biological Processes	GO:1901214	regulation of neuron death	-3.5	1.5	3.7	-1.8		GO Biological Processes	GO:0010827	regulation of glucose transmembrane transport	-3.2	2.2	3.8	-1.5
Reactome Gene Sets	R-MMU-1483206	Glycerophospholipid biosynthesis	-3.5	1.9	3.9	-1.8		GO Biological Processes	GO:0007044	cell-substrate junction assembly	-3.2	2.2	3.8	-1.5
GO Biological Processes	GO:0008630	intrinsic apoptotic signaling pathway in response to DNA damage	-3.5	1.9	3.9	-1.8		Reactome Gene Sets	R-MMU-3108232	SUMO E3 ligases SUMOylate target proteins	-3.2	1.9	3.7	-1.5
GO Biological Processes	GO:0072329	monocarboxylic acid catabolic process	-3.5	1.9	3.9	-1.8		GO Biological Processes	GO:0045444	fat cell differentiation	-3.2	1.7	3.6	-1.5
GO Biological Processes	GO:0051347	positive regulation of transferase activity	-3.5	1.4	3.6	-1.8		GO Biological Processes	GO:0050678	regulation of epithelial cell proliferation	-3.2	1.6	3.5	-1.5
GO Biological Processes	GO:0033365	protein localization to organelle	-3.5	1.3	3.6	-1.8		GO Biological Processes	GO:0002753	cytoplasmic pattern recognition receptor signaling pathway	-3.2	3	4.1	-1.5
GO Biological Processes	GO:0051402	neuron apoptotic process	-3.5	1.6	3.7	-1.7		GO Biological Processes	GO:0071407	cellular response to organic cyclic compound	-3.2	1.5	3.5	-1.5
GO Biological Processes	GO:0051193	regulation of cofactor metabolic process	-3.4	2.2	3.9	-1.7		GO Biological Processes	GO:0003143	embryonic heart tube morphogenesis	-3.2	2.4	3.9	-1.5
GO Biological Processes	GO:1990000	amyloid fibril formation	-3.4	3.9	4.4	-1.7		GO Biological Processes	GO:0045596	negative regulation of cell differentiation	-3.2	1.4	3.4	-1.5
GO Biological Processes	GO:0042407	cristae formation	-3.4	3.9	4.4	-1.7		KEGG Pathway	mmu04933	AGE-RAGE signaling pathway in diabetic complications	-3.2	2.1	3.7	-1.5
Reactome Gene Sets	R-MMU-69206	G1/S Transition	-3.4	2.4	4	-1.7		GO Biological Processes	GO:0046887	positive regulation of hormone secretion	-3.2	1.9	3.6	-1.5
GO Biological Processes	GO:0006090	pyruvate metabolic process	-3.4	1.9	3.8	-1.7		GO Biological Processes	GO:0010923	negative regulation of phosphatase activity	-3.2	2.3	3.8	-1.5
GO Biological Processes	GO:0009185	ribonucleoside diphosphate metabolic process	-3.4	2	3.8	-1.7		KEGG Pathway	mmu04722	Neurotrophin signaling pathway	-3.2	2	3.7	-1.5
GO Biological Processes	GO:1902110	positive regulation of mitochondrial membrane permeability involved in apoptotic process	-3.4	2.9	4.2	-1.7		GO Biological Processes	GO:0018209	peptidyl-serine modification	-3.2	1.6	3.5	-1.5
GO Biological Processes	GO:0017004	cytochrome complex assembly	-3.4	2.9	4.2	-1.7		GO Biological Processes	GO:0051591	response to cAMP	-3.2	2.5	3.9	-1.5
GO Biological Processes	GO:0001836	release of cytochrome c from mitochondria	-3.4	2.3	4	-1.7		GO Biological Processes	GO:0048562	embryonic organ morphogenesis	-3.2	1.6	3.5	-1.5
KEGG Pathway	mmu04110	Cell cycle	-3.4	1.9	3.8	-1.7		GO Biological Processes	GO:0050804	modulation of chemical synaptic transmission	-3.1	1.4	3.4	-1.4
GO Biological Processes	GO:0055088	lipid homeostasis	-3.4	1.8	3.8	-1.7		GO Biological Processes	GO:0034764	positive regulation of transmembrane transport	-3.1	1.7	3.5	-1.4
GO Biological Processes	GO:0031163	metallo-sulfur cluster assembly	-3.4	3.5	4.3	-1.7		GO Biological Processes	GO:0007224	smoothened signaling pathway	-3.1	1.9	3.6	-1.4
GO Biological Processes	GO:0051383	kinetochore organization	-3.4	3.5	4.3	-1.7		GO Biological Processes	GO:0060968	regulation of gene silencing	-3.1	2.2	3.7	-1.4
GO Biological Processes	GO:0016226	iron-sulfur cluster assembly	-3.4	3.5	4.3	-1.7		GO Biological Processes	GO:0046700	heterocycle catabolic process	-3.1	1.5	3.4	-1.4
GO Biological Processes	GO:0090201	negative regulation of release of cytochrome c from mitochondria	-3.4	3.5	4.3	-1.7		GO Biological Processes	GO:0099177	regulation of trans-synaptic signaling	-3.1	1.4	3.4	-1.4
Reactome Gene Sets	R-MMU-6798695	Neutrophil degranulation	-3.4	1.4	3.6	-1.7		GO Biological Processes	GO:0031503	protein-containing complex localization	-3.1	1.7	3.5	-1.4
GO Biological Processes	GO:0018198	peptidyl-cysteine modification	-3.4	2.5	4	-1.7		GO Biological Processes	GO:0090263	positive regulation of canonical Wnt signaling pathway	-3.1	2.1	3.7	-1.4
GO Biological Processes	GO:2000377	regulation of reactive oxygen species metabolic process	-3.4	1.7	3.7	-1.7		GO Biological Processes	GO:0051222	positive regulation of protein transport	-3.1	1.5	3.4	-1.4
Reactome Gene Sets	R-MMU-69618	Mitotic Spindle Checkpoint	-3.4	1.9	3.8	-1.7		GO Biological Processes	GO:0061178	regulation of insulin secretion involved in cellular response to glucose stimulus	-3.1	2.3	3.7	-1.4
GO Biological Processes	GO:0035794	positive regulation of mitochondrial membrane permeability	-3.4	2.7	4.1	-1.7		GO Biological Processes	GO:0016577	histone demethylation	-3.1	3.4	4.1	-1.4
GO Biological Processes	GO:0000027	ribosomal large subunit assembly	-3.4	2.7	4.1	-1.7		GO Biological Processes	GO:0070076	histone lysine demethylation	-3.1	3.4	4.1	-1.4
GO Biological Processes	GO:0072657	protein localization to membrane	-3.3	1.4	3.5	-1.7		GO Biological Processes	GO:0003007	heart morphogenesis	-3.1	1.6	3.5	-1.4
GO Biological Processes	GO:0019439	aromatic compound catabolic process	-3.3	1.4	3.5	-1.7		GO Biological Processes	GO:0007051	spindle organization	-3.1	1.8	3.6	-1.4
GO Biological Processes	GO:0009064	glutamine family amino acid metabolic process	-3.3	2.2	3.9	-1.7		GO Biological Processes	GO:0098693	regulation of synaptic vesicle cycle	-3.1	1.9	3.6	-1.4
GO Biological Processes	GO:0051289	protein homotetramerization	-3.3	2	3.8	-1.7		GO Biological Processes	GO:2000463	positive regulation of excitatory postsynaptic potential	-3.1	2.9	3.9	-1.4
GO Biological Processes	GO:0043649	dicarboxylic acid catabolic process	-3.3	4.2	4.4	-1.6		GO Biological Processes	GO:1905268	negative regulation of chromatin organization	-3.1	2.5	3.8	-1.4
GO Biological Processes	GO:0006644	phospholipid metabolic process	-3.3	1.5	3.6	-1.6		GO Biological Processes	GO:0070988	demethylation	-3.1	2.5	3.8	-1.4
GO Biological Processes	GO:0090199	regulation of release of cytochrome c from mitochondria	-3.3	2.5	3.9	-1.6		GO Biological Processes	GO:0071363	cellular response to growth factor stimulus	-3.1	1.4	3.4	-1.4
GO Biological Processes	GO:0010001	glial cell differentiation	-3.3	1.6	3.6	-1.6		KEGG Pathway	mmu04550	Signaling pathways regulating pluripotency of stem cells	-3.1	1.9	3.6	-1.4
GO Biological Processes	GO:0010876	lipid localization	-3.3	1.5	3.5	-1.6		GO Biological Processes	GO:0050905	neuromuscular process	-3.1	1.9	3.6	-1.4
Reactome Gene Sets	R-MMU-68867	Assembly of the pre-replicative complex	-3.2	2.2	3.8	-1.6		GO Biological Processes	GO:0060837	blood vessel endothelial cell differentiation	-3.1	5.6	4.6	-1.4
Reactome Gene Sets	R-MMU-2467813	Separation of Sister Chromatids	-3.2	1.8	3.6	-1.6		GO Biological Processes	GO:0003139	secondary heart field specification	-3.1	5.6	4.6	-1.4
GO Biological Processes	GO:0019217	regulation of fatty acid metabolic process	-3.2	2	3.7	-1.6		Reactome Gene Sets	R-MMU-1059683	Interleukin-6 signaling	-3.1	5.6	4.6	-1.4
GO Biological Processes	GO:0006734	NADH metabolic process	-3.2	3	4	-1.6		GO Biological Processes	GO:0098597	observational learning	-3.1	5.6	4.6	-1.4
GO Biological Processes	GO:0006536	glutamate metabolic process	-3.2	3	4	-1.6		GO Biological Processes	GO:0031032	actomyosin structure organization	-3.1	1.7	3.5	-1.4
GO Biological Processes	GO:0006108	malate metabolic process	-3.2	5.6	4.6	-1.6		GO Biological Processes	GO:0046888	negative regulation of hormone secretion	-3.1	2.1	3.7	-1.4
GO Biological Processes	GO:0042776	mitochondrial ATP synthesis coupled proton transport	-3.2	5.6	4.6	-1.6		Reactome Gene Sets	R-MMU-1502540	Signaling by Activin	-3.1	4.7	4.4	-1.4
Reactome Gene Sets	R-MMU-111453	BH3-only proteins associate with and inactivate anti-apoptotic BCL-2 members	-3.2	5.6	4.6	-1.6		GO Biological Processes	GO:0043620	regulation of DNA-templated transcription in response to stress	-3.1	2.5	3.8	-1.4
GO Biological Processes	GO:0006689	ganglioside catabolic process	-3.2	5.6	4.6	-1.6		GO Biological Processes	GO:0007043	cell-cell junction assembly	-3.1	2	3.6	-1.4
GO Biological Processes	GO:0043461	proton-transporting ATP synthase complex assembly	-3.2	5.6	4.6	-1.6		GO Biological Processes	GO:1902275	regulation of chromatin organization	-3	1.7	3.5	-1.4
GO Biological Processes	GO:0006986	response to unfolded protein	-3.2	1.9	3.7	-1.6		GO Biological Processes	GO:0051650	establishment of vesicle localization	-3	1.6	3.4	-1.4
KEGG Pathway	mmu00620	Pyruvate metabolism	-3.2	2.7	3.9	-1.6		KEGG Pathway	mmu04530	Tight junction	-3	1.8	3.5	-1.4
GO Biological Processes	GO:0006677	glycosylceramide metabolic process	-3.2	3.7	4.2	-1.6		GO Biological Processes	GO:0035303	regulation of dephosphorylation	-3	1.8	3.5	-1.4
GO Biological Processes	GO:0043393	regulation of protein binding	-3.2	1.6	3.5	-1.6		GO Biological Processes	GO:0050807	regulation of synapse organization	-3	1.6	3.4	-1.4
GO Biological Processes	GO:1902230	negative regulation of intrinsic apoptotic signaling pathway in response to DNA damage	-3.2	3.1	4.1	-1.5		GO Biological Processes	GO:0046578	regulation of Ras protein signal transduction	-3	1.7	3.5	-1.4
GO Biological Processes	GO:0018126	protein hydroxylation	-3.2	3.1	4.1	-1.5		GO Biological Processes	GO:0060997	dendritic spine morphogenesis	-3	2.3	3.7	-1.4
Reactome Gene Sets	R-MMU-196849	Metabolism of water-soluble vitamins and cofactors	-3.2	1.9	3.6	-1.5		GO Biological Processes	GO:0050770	regulation of axonogenesis	-3	1.7	3.5	-1.4
KEGG Pathway	mmu00564	Glycerophospholipid metabolism	-3.2	2	3.7	-1.5		GO Biological Processes	GO:0046394	carboxylic acid biosynthetic process	-3	1.5	3.4	-1.4
Reactome Gene Sets	R-MMU-453279	Mitotic G1-G1/S phases	-3.2	2.1	3.7	-1.5		GO Biological Processes	GO:0031016	pancreas development	-3	2.2	3.6	-1.4
Reactome Gene Sets	R-MMU-69615	G1/S DNA Damage Checkpoints	-3.2	3.3	4.1	-1.5		GO Biological Processes	GO:1904017	cellular response to Thyroglobulin triiodothyronine	-3	10	5.2	-1.4
GO Biological Processes	GO:0006783	heme biosynthetic process	-3.2	3.3	4.1	-1.5		GO Biological Processes	GO:0061368	behavioral response to formalin induced pain	-3	10	5.2	-1.4
Reactome Gene Sets	R-MMU-68877	Mitotic Prometaphase	-3.2	1.7	3.5	-1.5		CORUM	CORUM:5566	Isl1-Jak1-Stat3 complex	-3	10	5.2	-1.4
GO Biological Processes	GO:0042771	intrinsic apoptotic signaling pathway in response to DNA damage by p53 class mediator	-3.2	2.5	3.9	-1.5		GO Biological Processes	GO:1904016	response to Thyroglobulin triiodothyronine	-3	10	5.2	-1.4
GO Biological Processes	GO:0045859	regulation of protein kinase activity	-3.2	1.3	3.4	-1.5		GO Biological Processes	GO:0006211	5-methylcytosine catabolic process	-3	10	5.2	-1.4
Reactome Gene Sets	R-MMU-68886	M Phase	-3.2	1.5	3.5	-1.5		GO Biological Processes	GO:0019857	5-methylcytosine metabolic process	-3	10	5.2	-1.4
KEGG Pathway	mmu00600	Sphingolipid metabolism	-3.2	2.4	3.8	-1.5		GO Biological Processes	GO:0061366	behavioral response to chemical pain	-3	10	5.2	-1.4
GO Biological Processes	GO:0034655	nucleobase-containing compound catabolic process	-3.1	1.4	3.4	-1.5		GO Biological Processes	GO:0050795	regulation of behavior	-3	2.1	3.6	-1.4
GO Biological Processes	GO:0043524	negative regulation of neuron apoptotic process	-3.1	1.7	3.5	-1.5		GO Biological Processes	GO:0060999	positive regulation of dendritic spine development	-3	2.4	3.7	-1.4
Reactome Gene Sets	R-MMU-69306	DNA Replication	-3.1	1.8	3.6	-1.5		GO Biological Processes	GO:0001505	regulation of neurotransmitter levels	-3	1.5	3.4	-1.4
GO Biological Processes	GO:0009063	cellular amino acid catabolic process	-3.1	2	3.6	-1.5		GO Biological Processes	GO:1905477	positive regulation of protein localization to membrane	-3	2.1	3.6	-1.4
Reactome Gene Sets	R-MMU-69242	S Phase	-3.1	2	3.6	-1.5		GO Biological Processes	GO:0051225	spindle assembly	-3	2.1	3.6	-1.4
GO Biological Processes	GO:0009636	response to toxic substance	-3.1	1.5	3.4	-1.4		GO Biological Processes	GO:0007045	cell-substrate adherens junction assembly	-3	2.3	3.7	-1.4
GO Biological Processes	GO:0034660	ncRNA metabolic process	-3.1	1.4	3.3	-1.4		GO Biological Processes	GO:0048041	focal adhesion assembly	-3	2.3	3.7	-1.4
Reactome Gene Sets	R-MMU-156580	Phase II - Conjugation of compounds	-3.1	2	3.6	-1.4		GO Biological Processes	GO:0016053	organic acid biosynthetic process	-3	1.5	3.4	-1.4
Reactome Gene Sets	R-MMU-70263	Gluconeogenesis	-3	3	3.9	-1.4		GO Biological Processes	GO:0007099	centriole replication	-3	2.9	3.8	-1.3
GO Biological Processes	GO:0006779	porphyrin-containing compound biosynthetic process	-3	3	3.9	-1.4		Reactome Gene Sets	R-MMU-2990846	SUMOylation	-3	1.8	3.5	-1.3
GO Biological Processes	GO:0000280	nuclear division	-3	1.4	3.3	-1.4		GO Biological Processes	GO:0001667	ameboidal-type cell migration	-3	1.5	3.3	-1.3
GO Biological Processes	GO:0080135	regulation of cellular response to stress	-3	1.3	3.3	-1.4		GO Biological Processes	GO:0035335	peptidyl-tyrosine dephosphorylation	-3	3.3	4	-1.3
Reactome Gene Sets	R-MMU-453274	Mitotic G2-G2/M phases	-3	1.8	3.5	-1.4		GO Biological Processes	GO:0045724	positive regulation of cilium assembly	-3	3.3	4	-1.3
GO Biological Processes	GO:0051084	'de novo' posttranslational protein folding	-3	2.7	3.8	-1.4		GO Biological Processes	GO:0050803	regulation of synapse structure or activity	-3	1.6	3.4	-1.3
GO Biological Processes	GO:0034312	diol biosynthetic process	-3	3.5	4	-1.4		KEGG Pathway	mmu04510	Focal adhesion	-3	1.7	3.4	-1.3
GO Biological Processes	GO:0044270	cellular nitrogen compound catabolic process	-3	1.4	3.3	-1.4		GO Biological Processes	GO:0061001	regulation of dendritic spine morphogenesis	-3	2.6	3.7	-1.3
GO Biological Processes	GO:0042398	cellular modified amino acid biosynthetic process	-3	2.5	3.7	-1.4		GO Biological Processes	GO:0018023	peptidyl-lysine trimethylation	-3	2.7	3.8	-1.3
GO Biological Processes	GO:0000266	mitochondrial fission	-3	2.5	3.7	-1.4		GO Biological Processes	GO:0035278	miRNA mediated inhibition of translation	-3	3.9	4.1	-1.3
KEGG Pathway	mmu00260	Glycine, serine and threonine metabolism	-3	2.5	3.7	-1.4		GO Biological Processes	GO:0072578	neurotransmitter-gated ion channel clustering	-3	3.9	4.1	-1.3
GO Biological Processes	GO:0072523	purine-containing compound catabolic process	-3	2.5	3.7	-1.4		GO Biological Processes	GO:0038092	nodal signaling pathway	-3	3.9	4.1	-1.3
GO Biological Processes	GO:0017038	protein import	-3	1.6	3.4	-1.3		GO Biological Processes	GO:0060627	regulation of vesicle-mediated transport	-3	1.4	3.3	-1.3
GO Biological Processes	GO:0010662	regulation of striated muscle cell apoptotic process	-3	2.2	3.6	-1.3		GO Biological Processes	GO:0006346	methylation-dependent chromatin silencing	-3	3.5	4	-1.3
GO Biological Processes	GO:0042982	amyloid precursor protein metabolic process	-3	2.2	3.6	-1.3		GO Biological Processes	GO:0071901	negative regulation of protein serine/threonine kinase activity	-2.9	2	3.5	-1.3
GO Biological Processes	GO:0000462	maturation of SSU-rRNA from tricistronic rRNA transcript (SSU-rRNA, 5.8S rRNA, LSU-rRNA)	-3	2.8	3.8	-1.3		GO Biological Processes	GO:0050714	positive regulation of protein secretion	-2.9	1.6	3.3	-1.3
GO Biological Processes	GO:0072330	monocarboxylic acid biosynthetic process	-3	1.5	3.3	-1.3		GO Biological Processes	GO:0030178	negative regulation of Wnt signaling pathway	-2.9	1.8	3.4	-1.3
GO Biological Processes	GO:0045981	positive regulation of nucleotide metabolic process	-3	2.3	3.6	-1.3		GO Biological Processes	GO:0018210	peptidyl-threonine modification	-2.9	1.9	3.5	-1.3
GO Biological Processes	GO:1900544	positive regulation of purine nucleotide metabolic process	-3	2.3	3.6	-1.3		GO Biological Processes	GO:1901321	positive regulation of heart induction	-2.9	6.8	4.7	-1.3
GO Biological Processes	GO:0006813	potassium ion transport	-2.9	1.6	3.3	-1.3		Reactome Gene Sets	R-MMU-9645139	Stat5 Activation	-2.9	6.8	4.7	-1.3
GO Biological Processes	GO:0072594	establishment of protein localization to organelle	-2.9	1.4	3.3	-1.3		GO Biological Processes	GO:0072602	interleukin-4 secretion	-2.9	6.8	4.7	-1.3
GO Biological Processes	GO:0006107	oxaloacetate metabolic process	-2.9	4.2	4.1	-1.3		GO Biological Processes	GO:2000015	regulation of determination of dorsal identity	-2.9	6.8	4.7	-1.3
GO Biological Processes	GO:1901857	positive regulation of cellular respiration	-2.9	4.2	4.1	-1.3		GO Biological Processes	GO:1904683	regulation of metalloendopeptidase activity	-2.9	6.8	4.7	-1.3
GO Biological Processes	GO:1902166	negative regulation of intrinsic apoptotic signaling pathway in response to DNA damage by p53 class	-2.9	4.2	4.1	-1.3		GO Biological Processes	GO:0050673	epithelial cell proliferation	-2.9	1.5	3.3	-1.3
GO Biological Processes	GO:1901606	alpha-amino acid catabolic process	-2.9	2	3.5	-1.3		GO Biological Processes	GO:0045913	positive regulation of carbohydrate metabolic process	-2.9	2.2	3.6	-1.3
GO Biological Processes	GO:0045860	positive regulation of protein kinase activity	-2.9	1.4	3.2	-1.3		Reactome Gene Sets	R-MMU-2565942	Regulation of PLK1 Activity at G2/M Transition	-2.9	2.2	3.6	-1.3
GO Biological Processes	GO:0070085	glycosylation	-2.9	1.6	3.3	-1.3		GO Biological Processes	GO:0008589	regulation of smoothened signaling pathway	-2.9	2.2	3.6	-1.3
KEGG Pathway	mmu_M00079	Keratan sulfate degradation	-2.9	6.2	4.5	-1.3		GO Biological Processes	GO:0048679	regulation of axon regeneration	-2.9	3	3.8	-1.3
KEGG Pathway	M00079	Keratan sulfate degradation	-2.9	6.2	4.5	-1.3		GO Biological Processes	GO:0090596	sensory organ morphogenesis	-2.9	1.6	3.3	-1.3
GO Biological Processes	GO:0002905	regulation of mature B cell apoptotic process	-2.9	6.2	4.5	-1.3		GO Biological Processes	GO:0007163	establishment or maintenance of cell polarity	-2.9	1.7	3.4	-1.3
Reactome Gene Sets	R-MMU-176417	Phosphorylation of Emi1	-2.9	6.2	4.5	-1.3		GO Biological Processes	GO:0051347	positive regulation of transferase activity	-2.9	1.4	3.2	-1.3
GO Biological Processes	GO:0097503	sialylation	-2.9	6.2	4.5	-1.3		GO Biological Processes	GO:0044380	protein localization to cytoskeleton	-2.9	2.4	3.6	-1.3
GO Biological Processes	GO:0002901	mature B cell apoptotic process	-2.9	6.2	4.5	-1.3		GO Biological Processes	GO:0090066	regulation of anatomical structure size	-2.9	1.4	3.2	-1.3
GO Biological Processes	GO:0075525	viral translational termination-reinitiation	-2.9	6.2	4.5	-1.3		GO Biological Processes	GO:1904064	positive regulation of cation transmembrane transport	-2.9	1.8	3.4	-1.3
GO Biological Processes	GO:0002906	negative regulation of mature B cell apoptotic process	-2.9	6.2	4.5	-1.3		GO Biological Processes	GO:0007156	homophilic cell adhesion via plasma membrane adhesion molecules	-2.9	2	3.5	-1.3
GO Biological Processes	GO:1990743	protein sialylation	-2.9	6.2	4.5	-1.3		GO Biological Processes	GO:0002521	leukocyte differentiation	-2.9	1.4	3.2	-1.3
GO Biological Processes	GO:0034614	cellular response to reactive oxygen species	-2.9	1.7	3.4	-1.3		GO Biological Processes	GO:0072698	protein localization to microtubule cytoskeleton	-2.9	2.5	3.7	-1.3
GO Biological Processes	GO:1902991	regulation of amyloid precursor protein catabolic process	-2.9	2.6	3.7	-1.3		GO Biological Processes	GO:0006109	regulation of carbohydrate metabolic process	-2.9	1.7	3.4	-1.3
Reactome Gene Sets	R-MMU-77289	Mitochondrial Fatty Acid Beta-Oxidation	-2.9	2.6	3.7	-1.3		GO Biological Processes	GO:0060070	canonical Wnt signaling pathway	-2.9	1.6	3.3	-1.3
GO Biological Processes	GO:0000470	maturation of LSU-rRNA	-2.9	2.9	3.8	-1.3		GO Biological Processes	GO:0006110	regulation of glycolytic process	-2.9	2.6	3.7	-1.3
GO Biological Processes	GO:0033014	tetrapyrrole biosynthetic process	-2.9	2.9	3.8	-1.3		GO Biological Processes	GO:0030811	regulation of nucleotide catabolic process	-2.9	2.6	3.7	-1.3
KEGG Pathway	M00001	Glycolysis (Embden-Meyerhof pathway), glucose => pyruvate	-2.9	2.9	3.8	-1.3		GO Biological Processes	GO:0032956	regulation of actin cytoskeleton organization	-2.9	1.5	3.3	-1.3
KEGG Pathway	mmu_M00001	Glycolysis (Embden-Meyerhof pathway), glucose => pyruvate	-2.9	2.9	3.8	-1.3		Reactome Gene Sets	R-MMU-380287	Centrosome maturation	-2.9	2.2	3.5	-1.3
GO Biological Processes	GO:0097164	ammonium ion metabolic process	-2.9	1.7	3.3	-1.3		Reactome Gene Sets	R-MMU-380270	Recruitment of mitotic centrosome proteins and complexes	-2.9	2.2	3.5	-1.3
GO Biological Processes	GO:0051983	regulation of chromosome segregation	-2.9	1.9	3.4	-1.3		GO Biological Processes	GO:0032102	negative regulation of response to external stimulus	-2.9	1.5	3.3	-1.3
Reactome Gene Sets	R-MMU-8957275	Post-translational protein phosphorylation	-2.9	1.8	3.4	-1.3		GO Biological Processes	GO:0042532	negative regulation of tyrosine phosphorylation of STAT protein	-2.9	4.3	4.1	-1.3
Reactome Gene Sets	R-MMU-425397	Transport of vitamins, nucleosides, and related molecules	-2.9	2.5	3.6	-1.3		GO Biological Processes	GO:0035970	peptidyl-threonine dephosphorylation	-2.9	4.3	4.1	-1.3
Reactome Gene Sets	R-MMU-4086400	PCP/CE pathway	-2.9	2.5	3.6	-1.3		Reactome Gene Sets	R-MMU-418038	Nucleotide-like (purinergic) receptors	-2.9	4.3	4.1	-1.3
Reactome Gene Sets	R-MMU-917937	Iron uptake and transport	-2.9	2.2	3.5	-1.3		GO Biological Processes	GO:0031987	locomotion involved in locomotory behavior	-2.9	4.3	4.1	-1.3
Reactome Gene Sets	R-MMU-1793185	Chondroitin sulfate/dermatan sulfate metabolism	-2.9	2.4	3.6	-1.3		GO Biological Processes	GO:0010225	response to UV-C	-2.9	4.3	4.1	-1.3
GO Biological Processes	GO:1901029	negative regulation of mitochondrial outer membrane permeabilization involved in apoptotic signaling	-2.9	4.9	4.2	-1.3		GO Biological Processes	GO:1903827	regulation of cellular protein localization	-2.9	1.4	3.2	-1.3
GO Biological Processes	GO:0045039	protein import into mitochondrial inner membrane	-2.9	4.9	4.2	-1.3		GO Biological Processes	GO:0000724	double-strand break repair via homologous recombination	-2.9	1.9	3.4	-1.3
GO Biological Processes	GO:0046700	heterocycle catabolic process	-2.8	1.4	3.2	-1.3		GO Biological Processes	GO:0000725	recombinational repair	-2.9	1.9	3.4	-1.3
GO Biological Processes	GO:0009312	oligosaccharide biosynthetic process	-2.8	3.6	3.9	-1.3		GO Biological Processes	GO:0021537	telencephalon development	-2.9	1.6	3.3	-1.3
GO Biological Processes	GO:0071243	cellular response to arsenic-containing substance	-2.8	3.6	3.9	-1.3		GO Biological Processes	GO:0003013	circulatory system process	-2.9	1.4	3.2	-1.3
KEGG Pathway	M00003	Gluconeogenesis, oxaloacetate => fructose-6P	-2.8	3.3	3.8	-1.2		GO Biological Processes	GO:0022412	cellular process involved in reproduction in multicellular organism	-2.8	1.5	3.2	-1.3
GO Biological Processes	GO:0061081	positive regulation of myeloid leukocyte cytokine production involved in immune response	-2.8	3.3	3.8	-1.2		GO Biological Processes	GO:0072525	pyridine-containing compound biosynthetic process	-2.8	2	3.4	-1.3
KEGG Pathway	mmu_M00003	Gluconeogenesis, oxaloacetate => fructose-6P	-2.8	3.3	3.8	-1.2		GO Biological Processes	GO:0060998	regulation of dendritic spine development	-2.8	2.1	3.5	-1.3
Reactome Gene Sets	R-MMU-69275	G2/M Transition	-2.8	1.7	3.3	-1.2		GO Biological Processes	GO:0019359	nicotinamide nucleotide biosynthetic process	-2.8	2	3.4	-1.3
GO Biological Processes	GO:0019359	nicotinamide nucleotide biosynthetic process	-2.8	1.8	3.3	-1.2		GO Biological Processes	GO:0048015	phosphatidylinositol-mediated signaling	-2.8	1.8	3.4	-1.3
GO Biological Processes	GO:0007052	mitotic spindle organization	-2.8	1.8	3.3	-1.2		GO Biological Processes	GO:0031122	cytoplasmic microtubule organization	-2.8	2.4	3.6	-1.2
Reactome Gene Sets	R-MMU-1660661	Sphingolipid de novo biosynthesis	-2.8	2.4	3.5	-1.2		GO Biological Processes	GO:0006633	fatty acid biosynthetic process	-2.8	1.9	3.4	-1.2
GO Biological Processes	GO:0051262	protein tetramerization	-2.8	1.6	3.2	-1.2		GO Biological Processes	GO:0006813	potassium ion transport	-2.8	1.6	3.3	-1.2
GO Biological Processes	GO:0046148	pigment biosynthetic process	-2.8	2.2	3.5	-1.2		GO Biological Processes	GO:0097119	postsynaptic density protein 95 clustering	-2.8	5.1	4.3	-1.2
GO Biological Processes	GO:0030261	chromosome condensation	-2.8	2.3	3.5	-1.2		GO Biological Processes	GO:0090270	regulation of fibroblast growth factor production	-2.8	5.1	4.3	-1.2
GO Biological Processes	GO:0034508	centromere complex assembly	-2.8	2.8	3.6	-1.2		GO Biological Processes	GO:0002934	desmosome organization	-2.8	5.1	4.3	-1.2
GO Biological Processes	GO:0006486	protein glycosylation	-2.7	1.6	3.2	-1.2		GO Biological Processes	GO:0070857	regulation of bile acid biosynthetic process	-2.8	5.1	4.3	-1.2
GO Biological Processes	GO:0043413	macromolecule glycosylation	-2.7	1.6	3.2	-1.2		GO Biological Processes	GO:0002315	marginal zone B cell differentiation	-2.8	5.1	4.3	-1.2
GO Biological Processes	GO:0009991	response to extracellular stimulus	-2.7	1.4	3.1	-1.1		GO Biological Processes	GO:0032927	positive regulation of activin receptor signaling pathway	-2.8	5.1	4.3	-1.2
GO Biological Processes	GO:0051656	establishment of organelle localization	-2.7	1.4	3.1	-1.1		GO Biological Processes	GO:0090269	fibroblast growth factor production	-2.8	5.1	4.3	-1.2
GO Biological Processes	GO:0006096	glycolytic process	-2.7	1.9	3.3	-1.1		GO Biological Processes	GO:2000637	positive regulation of gene silencing by miRNA	-2.8	3.4	3.9	-1.2
GO Biological Processes	GO:0072331	signal transduction by p53 class mediator	-2.7	1.7	3.2	-1.1		GO Biological Processes	GO:0031061	negative regulation of histone methylation	-2.8	3.4	3.9	-1.2
KEGG Pathway	mmu00230	Purine metabolism	-2.7	1.6	3.2	-1.1		GO Biological Processes	GO:0050995	negative regulation of lipid catabolic process	-2.8	3.4	3.9	-1.2
GO Biological Processes	GO:0042063	gliogenesis	-2.7	1.4	3.1	-1.1		GO Biological Processes	GO:0019827	stem cell population maintenance	-2.8	1.8	3.3	-1.2
GO Biological Processes	GO:1902903	regulation of supramolecular fiber organization	-2.7	1.4	3.1	-1.1		GO Biological Processes	GO:0007281	germ cell development	-2.8	1.5	3.2	-1.2
KEGG Pathway	mmu00410	beta-Alanine metabolism	-2.7	2.6	3.5	-1.1		GO Biological Processes	GO:0031589	cell-substrate adhesion	-2.8	1.5	3.2	-1.2
GO Biological Processes	GO:0002082	regulation of oxidative phosphorylation	-2.7	2.6	3.5	-1.1		GO Biological Processes	GO:0006974	cellular response to DNA damage stimulus	-2.8	1.3	3.1	-1.2
GO Biological Processes	GO:0010667	negative regulation of cardiac muscle cell apoptotic process	-2.7	2.6	3.5	-1.1		GO Biological Processes	GO:0045974	regulation of translation, ncRNA-mediated	-2.8	3.7	3.9	-1.2
GO Biological Processes	GO:0071900	regulation of protein serine/threonine kinase activity	-2.7	1.4	3.1	-1.1		GO Biological Processes	GO:0040033	negative regulation of translation, ncRNA-mediated	-2.8	3.7	3.9	-1.2
GO Biological Processes	GO:0046685	response to arsenic-containing substance	-2.7	2.9	3.6	-1.1		GO Biological Processes	GO:0055090	acylglycerol homeostasis	-2.8	2.9	3.7	-1.2
GO Biological Processes	GO:0034311	diol metabolic process	-2.7	2.9	3.6	-1.1		GO Biological Processes	GO:0070328	triglyceride homeostasis	-2.8	2.9	3.7	-1.2
GO Biological Processes	GO:0000226	microtubule cytoskeleton organization	-2.7	1.3	3	-1.1		GO Biological Processes	GO:0002793	positive regulation of peptide secretion	-2.8	1.5	3.2	-1.2
GO Biological Processes	GO:0072525	pyridine-containing compound biosynthetic process	-2.7	1.8	3.2	-1.1		GO Biological Processes	GO:0048546	digestive tract morphogenesis	-2.8	2.5	3.6	-1.2
GO Biological Processes	GO:0010656	negative regulation of muscle cell apoptotic process	-2.7	2.1	3.4	-1.1		GO Biological Processes	GO:0097479	synaptic vesicle localization	-2.8	1.7	3.3	-1.2
GO Biological Processes	GO:0006123	mitochondrial electron transport, cytochrome c to oxygen	-2.7	3.9	3.8	-1.1		GO Biological Processes	GO:0042490	mechanoreceptor differentiation	-2.8	2.1	3.4	-1.2
GO Biological Processes	GO:0019646	aerobic electron transport chain	-2.7	3.9	3.8	-1.1		GO Biological Processes	GO:0045494	photoreceptor cell maintenance	-2.8	2.7	3.6	-1.2
GO Biological Processes	GO:0009068	aspartate family amino acid catabolic process	-2.7	3.9	3.8	-1.1		GO Biological Processes	GO:0051235	maintenance of location	-2.8	1.5	3.2	-1.2
GO Biological Processes	GO:1901215	negative regulation of neuron death	-2.7	1.5	3.1	-1.1		GO Biological Processes	GO:0001947	heart looping	-2.8	2.4	3.5	-1.2
GO Biological Processes	GO:0034502	protein localization to chromosome	-2.7	1.9	3.3	-1.1		GO Biological Processes	GO:0016458	gene silencing	-2.8	1.6	3.2	-1.2
KEGG Pathway	mmu03320	PPAR signaling pathway	-2.7	1.9	3.3	-1.1		GO Biological Processes	GO:0040008	regulation of growth	-2.7	1.3	3.1	-1.2
GO Biological Processes	GO:0044843	cell cycle G1/S phase transition	-2.7	1.6	3.1	-1.1		KEGG Pathway	mmu04015	Rap1 signaling pathway	-2.7	1.7	3.2	-1.2
Reactome Gene Sets	R-MMU-1483257	Phospholipid metabolism	-2.7	1.6	3.1	-1.1		GO Biological Processes	GO:0099645	neurotransmitter receptor localization to postsynaptic specialization membrane	-2.7	3	3.7	-1.2
GO Biological Processes	GO:0008315	G2/MI transition of meiotic cell cycle	-2.7	7.8	4.5	-1.1		GO Biological Processes	GO:0008206	bile acid metabolic process	-2.7	3	3.7	-1.2
CORUM	CORUM:1103	Wave1-Bcl-xl-Pancortin-2 complex, focal ischemic stroke induced	-2.7	7.8	4.5	-1.1		GO Biological Processes	GO:0006482	protein demethylation	-2.7	3	3.7	-1.2
GO Biological Processes	GO:1902445	regulation of mitochondrial membrane permeability involved in programmed necrotic cell death	-2.7	7.8	4.5	-1.1		GO Biological Processes	GO:0008214	protein dealkylation	-2.7	3	3.7	-1.2
GO Biological Processes	GO:0110030	regulation of G2/MI transition of meiotic cell cycle	-2.7	7.8	4.5	-1.1		GO Biological Processes	GO:0099633	protein localization to postsynaptic specialization membrane	-2.7	3	3.7	-1.2
GO Biological Processes	GO:0032690	negative regulation of interleukin-1 alpha production	-2.7	7.8	4.5	-1.1		GO Biological Processes	GO:0070252	actin-mediated cell contraction	-2.7	2.1	3.4	-1.2
GO Biological Processes	GO:0006533	aspartate catabolic process	-2.7	7.8	4.5	-1.1		GO Biological Processes	GO:0060541	respiratory system development	-2.7	1.6	3.2	-1.2
GO Biological Processes	GO:0030208	dermatan sulfate biosynthetic process	-2.7	7.8	4.5	-1.1		GO Biological Processes	GO:0003012	muscle system process	-2.7	1.5	3.1	-1.2
GO Biological Processes	GO:0046947	hydroxylysine biosynthetic process	-2.7	7.8	4.5	-1.1		GO Biological Processes	GO:0031347	regulation of defense response	-2.7	1.4	3.1	-1.2
GO Biological Processes	GO:0006106	fumarate metabolic process	-2.7	7.8	4.5	-1.1		GO Biological Processes	GO:0019439	aromatic compound catabolic process	-2.7	1.4	3.1	-1.2
GO Biological Processes	GO:0046946	hydroxylysine metabolic process	-2.7	7.8	4.5	-1.1		GO Biological Processes	GO:1903706	regulation of hemopoiesis	-2.7	1.5	3.1	-1.2
GO Biological Processes	GO:0110032	positive regulation of G2/MI transition of meiotic cell cycle	-2.7	7.8	4.5	-1.1		GO Biological Processes	GO:0048017	inositol lipid-mediated signaling	-2.7	1.8	3.2	-1.2
GO Biological Processes	GO:0051098	regulation of binding	-2.7	1.4	3	-1.1		KEGG Pathway	mmu05030	Cocaine addiction	-2.7	2.5	3.5	-1.2
GO Biological Processes	GO:0051293	establishment of spindle localization	-2.7	2.4	3.4	-1.1		GO Biological Processes	GO:0002066	columnar/cuboidal epithelial cell development	-2.7	2.2	3.4	-1.2
Reactome Gene Sets	R-MMU-72165	mRNA Splicing - Minor Pathway	-2.7	2.3	3.4	-1.1		GO Biological Processes	GO:0008015	blood circulation	-2.7	1.4	3.1	-1.2
GO Biological Processes	GO:2001236	regulation of extrinsic apoptotic signaling pathway	-2.7	1.6	3.2	-1.1		GO Biological Processes	GO:0050773	regulation of dendrite development	-2.7	1.7	3.2	-1.2
GO Biological Processes	GO:1901028	regulation of mitochondrial outer membrane permeabilization involved in apoptotic signaling pathway	-2.7	3.1	3.6	-1.1		GO Biological Processes	GO:0071805	potassium ion transmembrane transport	-2.7	1.7	3.2	-1.2
Reactome Gene Sets	R-MMU-9006934	Signaling by Receptor Tyrosine Kinases	-2.7	1.4	3	-1.1		GO Biological Processes	GO:0071804	cellular potassium ion transport	-2.7	1.7	3.2	-1.2
GO Biological Processes	GO:0006757	ATP generation from ADP	-2.7	1.9	3.2	-1.1		GO Biological Processes	GO:2001257	regulation of cation channel activity	-2.7	1.7	3.2	-1.2
Reactome Gene Sets	R-MMU-211859	Biological oxidations	-2.6	1.6	3.1	-1.1		GO Biological Processes	GO:0007050	cell cycle arrest	-2.7	1.8	3.3	-1.2
GO Biological Processes	GO:0030322	stabilization of membrane potential	-2.6	3.4	3.7	-1.1		GO Biological Processes	GO:0031056	regulation of histone modification	-2.7	1.8	3.2	-1.2
GO Biological Processes	GO:0006103	2-oxoglutarate metabolic process	-2.6	3.4	3.7	-1.1		GO Biological Processes	GO:0042430	indole-containing compound metabolic process	-2.7	3.2	3.7	-1.2
KEGG Pathway	mmu_M00075	N-glycan biosynthesis, complex type	-2.6	3.4	3.7	-1.1		Reactome Gene Sets	R-MMU-1489509	DAG and IP3 signaling	-2.7	3.2	3.7	-1.2
KEGG Pathway	M00075	N-glycan biosynthesis, complex type	-2.6	3.4	3.7	-1.1		GO Biological Processes	GO:0086019	cell-cell signaling involved in cardiac conduction	-2.7	3.2	3.7	-1.2
GO Biological Processes	GO:0031667	response to nutrient levels	-2.6	1.4	3	-1.1		GO Biological Processes	GO:0060148	positive regulation of posttranscriptional gene silencing	-2.7	3.2	3.7	-1.2
KEGG Pathway	mmu00630	Glyoxylate and dicarboxylate metabolism	-2.6	2.7	3.5	-1.1		GO Biological Processes	GO:0019363	pyridine nucleotide biosynthetic process	-2.7	2	3.3	-1.2
GO Biological Processes	GO:0046365	monosaccharide catabolic process	-2.6	2.7	3.5	-1.1		GO Biological Processes	GO:0033674	positive regulation of kinase activity	-2.7	1.4	3.1	-1.2
GO Biological Processes	GO:0010658	striated muscle cell apoptotic process	-2.6	2.1	3.3	-1.1		GO Biological Processes	GO:0010172	embryonic body morphogenesis	-2.7	4.1	3.9	-1.2
GO Biological Processes	GO:0006820	anion transport	-2.6	1.3	3	-1.1		GO Biological Processes	GO:0031054	pre-miRNA processing	-2.7	4.1	3.9	-1.2
GO Biological Processes	GO:0015711	organic anion transport	-2.6	1.4	3	-1.1		GO Biological Processes	GO:1901077	regulation of relaxation of muscle	-2.7	4.1	3.9	-1.2
GO Biological Processes	GO:0035967	cellular response to topologically incorrect protein	-2.6	1.8	3.2	-1.1		GO Biological Processes	GO:0051492	regulation of stress fiber assembly	-2.7	2.1	3.3	-1.1
GO Biological Processes	GO:0009408	response to heat	-2.6	1.8	3.2	-1.1		GO Biological Processes	GO:0007292	female gamete generation	-2.7	1.8	3.2	-1.1
GO Biological Processes	GO:0051187	cofactor catabolic process	-2.6	2.1	3.3	-1.1		Reactome Gene Sets	R-MMU-1852241	Organelle biogenesis and maintenance	-2.7	1.6	3.2	-1.1
KEGG Pathway	mmu00561	Glycerolipid metabolism	-2.6	2.1	3.3	-1.1		GO Biological Processes	GO:0031668	cellular response to extracellular stimulus	-2.7	1.6	3.2	-1.1
GO Biological Processes	GO:0019363	pyridine nucleotide biosynthetic process	-2.6	1.8	3.2	-1.1		GO Biological Processes	GO:0032288	myelin assembly	-2.7	3.5	3.8	-1.1
GO Biological Processes	GO:0006914	autophagy	-2.6	1.4	3	-1.1		GO Biological Processes	GO:0006699	bile acid biosynthetic process	-2.7	3.5	3.8	-1.1
GO Biological Processes	GO:0061919	process utilizing autophagic mechanism	-2.6	1.4	3	-1.1		GO Biological Processes	GO:0031330	negative regulation of cellular catabolic process	-2.7	1.6	3.1	-1.1
GO Biological Processes	GO:0016049	cell growth	-2.6	1.3	3	-1.1		GO Biological Processes	GO:0098727	maintenance of cell number	-2.7	1.7	3.2	-1.1
GO Biological Processes	GO:0046173	polyol biosynthetic process	-2.6	2	3.2	-1.1		GO Biological Processes	GO:0061512	protein localization to cilium	-2.6	2.4	3.4	-1.1
GO Biological Processes	GO:0043410	positive regulation of MAPK cascade	-2.6	1.3	3	-1.1		GO Biological Processes	GO:0046676	negative regulation of insulin secretion	-2.6	2.4	3.4	-1.1
KEGG Pathway	mmu00510	N-Glycan biosynthesis	-2.6	2.2	3.3	-1.1		GO Biological Processes	GO:0071248	cellular response to metal ion	-2.6	1.8	3.2	-1.1
Reactome Gene Sets	R-MMU-6806667	Metabolism of fat-soluble vitamins	-2.6	2.2	3.3	-1.1		GO Biological Processes	GO:0045785	positive regulation of cell adhesion	-2.6	1.5	3.1	-1.1
Reactome Gene Sets	R-MMU-1660662	Glycosphingolipid metabolism	-2.6	2.4	3.4	-1.1		Reactome Gene Sets	R-MMU-9006925	Intracellular signaling by second messengers	-2.6	1.7	3.1	-1.1
GO Biological Processes	GO:0009069	serine family amino acid metabolic process	-2.6	2.4	3.4	-1.1		GO Biological Processes	GO:0097480	establishment of synaptic vesicle localization	-2.6	1.7	3.2	-1.1
GO Biological Processes	GO:0044839	cell cycle G2/M phase transition	-2.6	1.7	3.1	-1.1		GO Biological Processes	GO:0048489	synaptic vesicle transport	-2.6	1.7	3.2	-1.1
GO Biological Processes	GO:0045786	negative regulation of cell cycle	-2.6	1.4	3	-1.1		GO Biological Processes	GO:0090075	relaxation of muscle	-2.6	2.9	3.6	-1.1
GO Biological Processes	GO:0009266	response to temperature stimulus	-2.6	1.6	3.1	-1.1		KEGG Pathway	mmu04710	Circadian rhythm	-2.6	2.9	3.6	-1.1
GO Biological Processes	GO:0042181	ketone biosynthetic process	-2.6	2.3	3.3	-1.1		GO Biological Processes	GO:0032232	negative regulation of actin filament bundle assembly	-2.6	2.9	3.6	-1.1
GO Biological Processes	GO:0000910	cytokinesis	-2.6	1.6	3.1	-1.1		GO Biological Processes	GO:0002792	negative regulation of peptide secretion	-2.6	1.8	3.2	-1.1
Reactome Gene Sets	R-MMU-68949	Orc1 removal from chromatin	-2.6	2.8	3.5	-1		GO Biological Processes	GO:0001508	action potential	-2.6	1.8	3.2	-1.1
GO Biological Processes	GO:0019320	hexose catabolic process	-2.6	2.8	3.5	-1		GO Biological Processes	GO:0030177	positive regulation of Wnt signaling pathway	-2.6	1.8	3.2	-1.1
GO Biological Processes	GO:0006681	galactosylceramide metabolic process	-2.6	4.3	3.8	-1		Reactome Gene Sets	R-MMU-74751	Insulin receptor signalling cascade	-2.6	2.5	3.4	-1.1
GO Biological Processes	GO:1903748	negative regulation of establishment of protein localization to mitochondrion	-2.6	4.3	3.8	-1		Reactome Gene Sets	R-MMU-380320	Recruitment of NuMA to mitotic centrosomes	-2.6	2	3.3	-1.1
Reactome Gene Sets	R-MMU-6804116	TP53 Regulates Transcription of Genes Involved in G1 Cell Cycle Arrest	-2.6	4.3	3.8	-1		GO Biological Processes	GO:0043949	regulation of cAMP-mediated signaling	-2.6	2.3	3.4	-1.1
GO Biological Processes	GO:0006013	mannose metabolic process	-2.6	4.3	3.8	-1		GO Biological Processes	GO:0040018	positive regulation of multicellular organism growth	-2.6	2.6	3.5	-1.1
GO Biological Processes	GO:0006012	galactose metabolic process	-2.6	4.3	3.8	-1		GO Biological Processes	GO:0031057	negative regulation of histone modification	-2.6	2.6	3.5	-1.1
GO Biological Processes	GO:0106049	regulation of cellular response to osmotic stress	-2.6	4.3	3.8	-1		GO Biological Processes	GO:0060964	regulation of gene silencing by miRNA	-2.6	2.6	3.5	-1.1
GO Biological Processes	GO:0034551	mitochondrial respiratory chain complex III assembly	-2.6	4.3	3.8	-1		GO Biological Processes	GO:0010907	positive regulation of glucose metabolic process	-2.6	2.6	3.5	-1.1
GO Biological Processes	GO:0017062	respiratory chain complex III assembly	-2.6	4.3	3.8	-1		GO Biological Processes	GO:0086065	cell communication involved in cardiac conduction	-2.6	2.7	3.5	-1.1
GO Biological Processes	GO:0042440	pigment metabolic process	-2.5	2	3.2	-1		GO Biological Processes	GO:0051647	nucleus localization	-2.6	2.7	3.5	-1.1
Reactome Gene Sets	R-MMU-381426	Regulation of Insulin-like Growth Factor (IGF) transport and uptake by Insulin-like Growth Factor Bi	-2.5	1.7	3.1	-1		GO Biological Processes	GO:0043491	protein kinase B signaling	-2.6	1.7	3.1	-1.1
GO Biological Processes	GO:0016485	protein processing	-2.5	1.5	3	-1		GO Biological Processes	GO:0007269	neurotransmitter secretion	-2.6	1.7	3.1	-1.1
GO Biological Processes	GO:0006637	acyl-CoA metabolic process	-2.5	1.9	3.1	-1		GO Biological Processes	GO:0051668	localization within membrane	-2.6	1.7	3.1	-1.1
Reactome Gene Sets	R-MMU-69002	DNA Replication Pre-Initiation	-2.5	1.9	3.1	-1		GO Biological Processes	GO:0045876	positive regulation of sister chromatid cohesion	-2.6	4.6	4	-1.1
GO Biological Processes	GO:0035383	thioester metabolic process	-2.5	1.9	3.1	-1		GO Biological Processes	GO:0006586	indolalkylamine metabolic process	-2.6	4.6	4	-1.1
GO Biological Processes	GO:0034620	cellular response to unfolded protein	-2.5	1.9	3.1	-1		GO Biological Processes	GO:0090209	negative regulation of triglyceride metabolic process	-2.6	4.6	4	-1.1
GO Biological Processes	GO:0033865	nucleoside bisphosphate metabolic process	-2.5	1.8	3.1	-1		GO Biological Processes	GO:0006568	tryptophan metabolic process	-2.6	4.6	4	-1.1
GO Biological Processes	GO:0034032	purine nucleoside bisphosphate metabolic process	-2.5	1.8	3.1	-1		GO Biological Processes	GO:0035864	response to potassium ion	-2.6	5.8	4.2	-1.1
GO Biological Processes	GO:0033875	ribonucleoside bisphosphate metabolic process	-2.5	1.8	3.1	-1		GO Biological Processes	GO:0086023	adenylate cyclase-activating adrenergic receptor signaling pathway involved in heart process	-2.6	5.8	4.2	-1.1
GO Biological Processes	GO:0032692	negative regulation of interleukin-1 production	-2.5	2.6	3.4	-1		GO Biological Processes	GO:1900020	positive regulation of protein kinase C activity	-2.6	5.8	4.2	-1.1
GO Biological Processes	GO:1902253	regulation of intrinsic apoptotic signaling pathway by p53 class mediator	-2.5	2.6	3.4	-1		GO Biological Processes	GO:0035280	miRNA loading onto RISC involved in gene silencing by miRNA	-2.6	5.8	4.2	-1.1
GO Biological Processes	GO:0051085	chaperone cofactor-dependent protein refolding	-2.5	2.6	3.4	-1		GO Biological Processes	GO:1900019	regulation of protein kinase C activity	-2.6	5.8	4.2	-1.1
GO Biological Processes	GO:0042168	heme metabolic process	-2.5	2.6	3.4	-1		Reactome Gene Sets	R-MMU-426496	Post-transcriptional silencing by small RNAs	-2.6	5.8	4.2	-1.1
GO Biological Processes	GO:1904666	regulation of ubiquitin protein ligase activity	-2.5	3	3.5	-1		GO Biological Processes	GO:0038026	reelin-mediated signaling pathway	-2.6	5.8	4.2	-1.1
Reactome Gene Sets	R-MMU-2132295	MHC class II antigen presentation	-2.5	1.8	3.1	-1		GO Biological Processes	GO:0035865	cellular response to potassium ion	-2.6	5.8	4.2	-1.1
GO Biological Processes	GO:0033615	mitochondrial proton-transporting ATP synthase complex assembly	-2.5	5.2	3.9	-1		GO Biological Processes	GO:0002154	thyroid hormone mediated signaling pathway	-2.6	5.8	4.2	-1.1
GO Biological Processes	GO:1905446	regulation of mitochondrial ATP synthesis coupled electron transport	-2.5	5.2	3.9	-1		GO Biological Processes	GO:0008542	visual learning	-2.6	2.2	3.3	-1.1
KEGG Pathway	mmu_M00085	Fatty acid biosynthesis, elongation, mitochondria	-2.5	5.2	3.9	-1		GO Biological Processes	GO:0045860	positive regulation of protein kinase activity	-2.6	1.4	3	-1.1
KEGG Pathway	M00085	Fatty acid biosynthesis, elongation, mitochondria	-2.5	5.2	3.9	-1		GO Biological Processes	GO:0072347	response to anesthetic	-2.6	2.4	3.4	-1.1
Reactome Gene Sets	R-MMU-2142770	Synthesis of 15-eicosatetraenoic acid derivatives	-2.5	5.2	3.9	-1		GO Biological Processes	GO:0032535	regulation of cellular component size	-2.6	1.5	3	-1.1
Reactome Gene Sets	R-MMU-450302	activated TAK1 mediates p38 MAPK activation	-2.5	5.2	3.9	-1		GO Biological Processes	GO:0099565	chemical synaptic transmission, postsynaptic	-2.6	2	3.2	-1.1
GO Biological Processes	GO:0000082	G1/S transition of mitotic cell cycle	-2.5	1.6	3	-1		GO Biological Processes	GO:0045926	negative regulation of growth	-2.6	1.6	3.1	-1.1
GO Biological Processes	GO:0034248	regulation of cellular amide metabolic process	-2.5	1.4	2.9	-0.99		GO Biological Processes	GO:0008016	regulation of heart contraction	-2.6	1.7	3.1	-1.1
Reactome Gene Sets	R-MMU-8956319	Nucleobase catabolism	-2.5	2.4	3.3	-0.99		Reactome Gene Sets	R-MMU-3247509	Chromatin modifying enzymes	-2.6	1.7	3.1	-1.1
Reactome Gene Sets	R-MMU-382551	Transport of small molecules	-2.5	1.3	2.9	-0.99		Reactome Gene Sets	R-MMU-4839726	Chromatin organization	-2.6	1.7	3.1	-1.1
GO Biological Processes	GO:0051235	maintenance of location	-2.5	1.4	2.9	-0.99		GO Biological Processes	GO:0045833	negative regulation of lipid metabolic process	-2.6	2	3.2	-1.1
Reactome Gene Sets	R-MMU-975634	Retinoid metabolism and transport	-2.5	2.3	3.2	-0.99		GO Biological Processes	GO:0006096	glycolytic process	-2.6	2	3.2	-1.1
GO Biological Processes	GO:0042987	amyloid precursor protein catabolic process	-2.5	2.3	3.2	-0.99		Reactome Gene Sets	R-MMU-4420097	VEGFA-VEGFR2 Pathway	-2.6	2	3.2	-1.1
GO Biological Processes	GO:0034982	mitochondrial protein processing	-2.5	3.6	3.6	-0.99		KEGG Pathway	mmu04910	Insulin signaling pathway	-2.6	1.8	3.1	-1.1
GO Biological Processes	GO:0061615	glycolytic process through fructose-6-phosphate	-2.5	3.6	3.6	-0.99		GO Biological Processes	GO:0030534	adult behavior	-2.6	1.7	3.1	-1.1
GO Biological Processes	GO:0051299	centrosome separation	-2.5	3.6	3.6	-0.99		GO Biological Processes	GO:0099643	signal release from synapse	-2.6	1.7	3.1	-1.1
GO Biological Processes	GO:1903862	positive regulation of oxidative phosphorylation	-2.5	3.6	3.6	-0.99		GO Biological Processes	GO:0060612	adipose tissue development	-2.5	2.4	3.4	-1.1
GO Biological Processes	GO:0042866	pyruvate biosynthetic process	-2.5	1.8	3.1	-0.99		GO Biological Processes	GO:0042491	inner ear auditory receptor cell differentiation	-2.5	2.4	3.4	-1.1
GO Biological Processes	GO:0006744	ubiquinone biosynthetic process	-2.5	3.2	3.5	-0.99		GO Biological Processes	GO:0030865	cortical cytoskeleton organization	-2.5	2.4	3.4	-1.1
GO Biological Processes	GO:1901663	quinone biosynthetic process	-2.5	3.2	3.5	-0.99		Reactome Gene Sets	R-MMU-383280	Nuclear Receptor transcription pathway	-2.5	2.4	3.4	-1.1
GO Biological Processes	GO:0034501	protein localization to kinetochore	-2.5	3.2	3.5	-0.99		GO Biological Processes	GO:0045616	regulation of keratinocyte differentiation	-2.5	2.8	3.5	-1
GO Biological Processes	GO:0000463	maturation of LSU-rRNA from tricistronic rRNA transcript (SSU-rRNA, 5.8S rRNA, LSU-rRNA)	-2.5	3.2	3.5	-0.99		Reactome Gene Sets	R-MMU-177929	Signaling by EGFR	-2.5	2.5	3.4	-1
GO Biological Processes	GO:0090502	RNA phosphodiester bond hydrolysis, endonucleolytic	-2.5	3.2	3.5	-0.99		GO Biological Processes	GO:0032924	activin receptor signaling pathway	-2.5	2.5	3.4	-1
GO Biological Processes	GO:0010660	regulation of muscle cell apoptotic process	-2.5	1.8	3	-0.97		GO Biological Processes	GO:1901522	positive regulation of transcription from RNA polymerase II promoter involved in cellular response t	-2.5	3.4	3.6	-1
GO Biological Processes	GO:0051493	regulation of cytoskeleton organization	-2.4	1.3	2.8	-0.97		Reactome Gene Sets	R-MMU-8849932	Synaptic adhesion-like molecules	-2.5	3.4	3.6	-1
Reactome Gene Sets	R-MMU-9609507	Protein localization	-2.4	1.8	3	-0.96		GO Biological Processes	GO:0003230	cardiac atrium development	-2.5	2.7	3.4	-1
Reactome Gene Sets	R-MMU-77075	RNA Pol II CTD phosphorylation and interaction with CE	-2.4	2.7	3.3	-0.95		GO Biological Processes	GO:0070570	regulation of neuron projection regeneration	-2.5	2.7	3.4	-1
GO Biological Processes	GO:0051051	negative regulation of transport	-2.4	1.3	2.8	-0.95		GO Biological Processes	GO:0106070	regulation of adenylate cyclase-activating G protein-coupled receptor signaling pathway	-2.5	3.8	3.7	-1
GO Biological Processes	GO:0014902	myotube differentiation	-2.4	1.7	3	-0.95		GO Biological Processes	GO:0014733	regulation of skeletal muscle adaptation	-2.5	3.8	3.7	-1
GO Biological Processes	GO:0007346	regulation of mitotic cell cycle	-2.4	1.3	2.8	-0.94		GO Biological Processes	GO:1901361	organic cyclic compound catabolic process	-2.5	1.4	2.9	-1
GO Biological Processes	GO:1902532	negative regulation of intracellular signal transduction	-2.4	1.3	2.8	-0.94		KEGG Pathway	mmu04713	Circadian entrainment	-2.5	2	3.2	-1
GO Biological Processes	GO:2000378	negative regulation of reactive oxygen species metabolic process	-2.4	2	3.1	-0.93		GO Biological Processes	GO:0006757	ATP generation from ADP	-2.5	2	3.2	-1
GO Biological Processes	GO:0010975	regulation of neuron projection development	-2.4	1.3	2.8	-0.92		GO Biological Processes	GO:0098742	cell-cell adhesion via plasma-membrane adhesion molecules	-2.5	1.6	3	-1
Reactome Gene Sets	R-MMU-917977	Transferrin endocytosis and recycling	-2.4	2.5	3.2	-0.92		GO Biological Processes	GO:0001666	response to hypoxia	-2.5	1.6	3	-1
GO Biological Processes	GO:0019674	NAD metabolic process	-2.4	2.2	3.1	-0.91		GO Biological Processes	GO:0050994	regulation of lipid catabolic process	-2.5	2.3	3.3	-1
GO Biological Processes	GO:0033013	tetrapyrrole metabolic process	-2.4	2.2	3.1	-0.91		GO Biological Processes	GO:0006302	double-strand break repair	-2.5	1.6	3	-1
GO Biological Processes	GO:0051294	establishment of spindle orientation	-2.4	2.4	3.2	-0.9		GO Biological Processes	GO:0048638	regulation of developmental growth	-2.5	1.4	2.9	-1
GO Biological Processes	GO:1902652	secondary alcohol metabolic process	-2.4	1.7	2.9	-0.9		GO Biological Processes	GO:0062012	regulation of small molecule metabolic process	-2.5	1.5	3	-1
GO Biological Processes	GO:0045862	positive regulation of proteolysis	-2.4	1.4	2.8	-0.89		KEGG Pathway	mmu04725	Cholinergic synapse	-2.5	1.9	3.1	-1
GO Biological Processes	GO:0010665	regulation of cardiac muscle cell apoptotic process	-2.3	2	3	-0.88		GO Biological Processes	GO:1904019	epithelial cell apoptotic process	-2.5	1.9	3.1	-1
GO Biological Processes	GO:0072527	pyrimidine-containing compound metabolic process	-2.3	2	3	-0.88		GO Biological Processes	GO:0001701	in utero embryonic development	-2.5	1.4	2.9	-1
GO Biological Processes	GO:0043270	positive regulation of ion transport	-2.3	1.4	2.8	-0.87		GO Biological Processes	GO:0055080	cation homeostasis	-2.5	1.3	2.9	-1
GO Biological Processes	GO:0008203	cholesterol metabolic process	-2.3	1.7	2.9	-0.86		GO Biological Processes	GO:0045786	negative regulation of cell cycle	-2.5	1.4	2.9	-1
GO Biological Processes	GO:0042632	cholesterol homeostasis	-2.3	1.8	3	-0.86		GO Biological Processes	GO:0010676	positive regulation of cellular carbohydrate metabolic process	-2.5	2.2	3.2	-1
GO Biological Processes	GO:0043268	positive regulation of potassium ion transport	-2.3	2.1	3	-0.86		Reactome Gene Sets	R-MMU-194840	Rho GTPase cycle	-2.5	1.8	3.1	-1
GO Biological Processes	GO:0010971	positive regulation of G2/M transition of mitotic cell cycle	-2.3	2.6	3.2	-0.86		GO Biological Processes	GO:0003279	cardiac septum development	-2.5	1.8	3.1	-1
KEGG Pathway	mmu00062	Fatty acid elongation	-2.3	2.6	3.2	-0.86		GO Biological Processes	GO:0007140	male meiotic nuclear division	-2.5	2.4	3.3	-1
Reactome Gene Sets	R-MMU-77387	Insulin receptor recycling	-2.3	2.6	3.2	-0.86		GO Biological Processes	GO:0051259	protein complex oligomerization	-2.5	1.3	2.9	-1
Reactome Gene Sets	R-MMU-176408	Regulation of APC/C activators between G1/S and early anaphase	-2.3	2.6	3.2	-0.86		GO Biological Processes	GO:0060249	anatomical structure homeostasis	-2.5	1.4	2.9	-1
GO Biological Processes	GO:0016486	peptide hormone processing	-2.3	3	3.3	-0.86		GO Biological Processes	GO:0003341	cilium movement	-2.5	2.1	3.2	-1
Reactome Gene Sets	R-MMU-69563	p53-Dependent G1 DNA Damage Response	-2.3	3	3.3	-0.86		GO Biological Processes	GO:0006865	amino acid transport	-2.5	1.7	3	-1
Reactome Gene Sets	R-MMU-9609523	Insertion of tail-anchored proteins into the endoplasmic reticulum membrane	-2.3	3	3.3	-0.86		GO Biological Processes	GO:0014909	smooth muscle cell migration	-2.5	2	3.1	-1
Reactome Gene Sets	R-MMU-69580	p53-Dependent G1/S DNA damage checkpoint	-2.3	3	3.3	-0.86		GO Biological Processes	GO:0035270	endocrine system development	-2.5	1.8	3.1	-1
Reactome Gene Sets	R-MMU-114452	Activation of BH3-only proteins	-2.3	3	3.3	-0.86		GO Biological Processes	GO:0045598	regulation of fat cell differentiation	-2.5	1.8	3.1	-1
Reactome Gene Sets	R-MMU-187577	SCF(Skp2)-mediated degradation of p27/p21	-2.3	3	3.3	-0.86		GO Biological Processes	GO:0017158	regulation of calcium ion-dependent exocytosis	-2.5	1.8	3.1	-1
GO Biological Processes	GO:0006743	ubiquinone metabolic process	-2.3	3	3.3	-0.86		GO Biological Processes	GO:0061003	positive regulation of dendritic spine morphogenesis	-2.5	3	3.4	-1
Reactome Gene Sets	R-MMU-74259	Purine catabolism	-2.3	3	3.3	-0.86		GO Biological Processes	GO:0036003	positive regulation of transcription from RNA polymerase II promoter in response to stress	-2.5	3	3.4	-1
GO Biological Processes	GO:0000479	endonucleolytic cleavage of tricistronic rRNA transcript (SSU-rRNA, 5.8S rRNA, LSU-rRNA)	-2.3	3.9	3.5	-0.86		GO Biological Processes	GO:0014910	regulation of smooth muscle cell migration	-2.4	2	3.1	-1
Reactome Gene Sets	R-MMU-1614558	Degradation of cysteine and homocysteine	-2.3	3.9	3.5	-0.86		KEGG Pathway	mmu04012	ErbB signaling pathway	-2.4	2	3.1	-1
GO Biological Processes	GO:0072321	chaperone-mediated protein transport	-2.3	3.9	3.5	-0.86		GO Biological Processes	GO:2000211	regulation of glutamate metabolic process	-2.4	7.6	4.4	-1
Reactome Gene Sets	R-MMU-390247	Beta-oxidation of very long chain fatty acids	-2.3	3.9	3.5	-0.86		CORUM	CORUM:1164	ActRIIA-ActRIB-Smad3-Arip1 complex	-2.4	7.6	4.4	-1
GO Biological Processes	GO:0006560	proline metabolic process	-2.3	3.9	3.5	-0.86		Reactome Gene Sets	R-MMU-165158	Activation of AKT2	-2.4	7.6	4.4	-1
GO Biological Processes	GO:0006707	cholesterol catabolic process	-2.3	3.9	3.5	-0.86		GO Biological Processes	GO:0071896	protein localization to adherens junction	-2.4	7.6	4.4	-1
GO Biological Processes	GO:0016127	sterol catabolic process	-2.3	3.9	3.5	-0.86		GO Biological Processes	GO:0032053	ciliary basal body organization	-2.4	7.6	4.4	-1
Reactome Gene Sets	R-MMU-189451	Heme biosynthesis	-2.3	3.9	3.5	-0.86		GO Biological Processes	GO:0071878	negative regulation of adenylate cyclase-activating adrenergic receptor signaling pathway	-2.4	7.6	4.4	-1
GO Biological Processes	GO:0019374	galactolipid metabolic process	-2.3	3.9	3.5	-0.86		GO Biological Processes	GO:0097167	circadian regulation of translation	-2.4	7.6	4.4	-1
GO Biological Processes	GO:1904667	negative regulation of ubiquitin protein ligase activity	-2.3	3.9	3.5	-0.86		Reactome Gene Sets	R-MMU-400511	Synthesis, secretion, and inactivation of Glucose-dependent Insulinotropic Polypeptide (GIP)	-2.4	7.6	4.4	-1
KEGG Pathway	mmu_M00010	Citrate cycle, first carbon oxidation, oxaloacetate => 2-oxoglutarate	-2.3	3.9	3.5	-0.86		GO Biological Processes	GO:0097211	cellular response to gonadotropin-releasing hormone	-2.4	7.6	4.4	-1
GO Biological Processes	GO:0090336	positive regulation of brown fat cell differentiation	-2.3	3.9	3.5	-0.86		GO Biological Processes	GO:0140192	regulation of adenylate cyclase-activating adrenergic receptor signaling pathway involved in heart p	-2.4	7.6	4.4	-1
GO Biological Processes	GO:0015780	nucleotide-sugar transmembrane transport	-2.3	3.9	3.5	-0.86		GO Biological Processes	GO:0015734	taurine transport	-2.4	7.6	4.4	-1
GO Biological Processes	GO:0061684	chaperone-mediated autophagy	-2.3	3.9	3.5	-0.86		GO Biological Processes	GO:0060125	negative regulation of growth hormone secretion	-2.4	7.6	4.4	-1
GO Biological Processes	GO:1905245	regulation of aspartic-type peptidase activity	-2.3	3.9	3.5	-0.86		GO Biological Processes	GO:0090660	cerebrospinal fluid circulation	-2.4	7.6	4.4	-1
GO Biological Processes	GO:0000478	endonucleolytic cleavage involved in rRNA processing	-2.3	3.9	3.5	-0.86		CORUM	CORUM:2954	Smad1-Notch1-p300-Pcaf complex	-2.4	7.6	4.4	-1
KEGG Pathway	M00010	Citrate cycle, first carbon oxidation, oxaloacetate => 2-oxoglutarate	-2.3	3.9	3.5	-0.86		GO Biological Processes	GO:0090074	negative regulation of protein homodimerization activity	-2.4	7.6	4.4	-1
GO Biological Processes	GO:0010507	negative regulation of autophagy	-2.3	1.9	3	-0.86		GO Biological Processes	GO:0097210	response to gonadotropin-releasing hormone	-2.4	7.6	4.4	-1
GO Biological Processes	GO:0045454	cell redox homeostasis	-2.3	2	3	-0.86		GO Biological Processes	GO:1904684	negative regulation of metalloendopeptidase activity	-2.4	7.6	4.4	-1
GO Biological Processes	GO:0043462	regulation of ATPase activity	-2.3	2	3	-0.86		GO Biological Processes	GO:0070366	regulation of hepatocyte differentiation	-2.4	7.6	4.4	-1
GO Biological Processes	GO:2001239	regulation of extrinsic apoptotic signaling pathway in absence of ligand	-2.3	2.2	3	-0.85		GO Biological Processes	GO:0035196	production of miRNAs involved in gene silencing by miRNA	-2.4	2.5	3.3	-1
GO Biological Processes	GO:0032102	negative regulation of response to external stimulus	-2.3	1.4	2.7	-0.85		GO Biological Processes	GO:0009314	response to radiation	-2.4	1.4	2.9	-1
GO Biological Processes	GO:1905952	regulation of lipid localization	-2.3	1.6	2.8	-0.84		GO Biological Processes	GO:0032412	regulation of ion transmembrane transporter activity	-2.4	1.6	2.9	-1
GO Biological Processes	GO:0000302	response to reactive oxygen species	-2.3	1.5	2.8	-0.84		KEGG Pathway	mmu04724	Glutamatergic synapse	-2.4	1.9	3.1	-1
Reactome Gene Sets	R-MMU-113418	Formation of the Early Elongation Complex	-2.3	2.4	3.1	-0.84		GO Biological Processes	GO:0043087	regulation of GTPase activity	-2.4	1.5	2.9	-1
GO Biological Processes	GO:0006767	water-soluble vitamin metabolic process	-2.3	2.4	3.1	-0.84		GO Biological Processes	GO:0048639	positive regulation of developmental growth	-2.4	1.6	3	-1
GO Biological Processes	GO:0006220	pyrimidine nucleotide metabolic process	-2.3	2.4	3.1	-0.84		GO Biological Processes	GO:0002065	columnar/cuboidal epithelial cell differentiation	-2.4	1.8	3	-1
GO Biological Processes	GO:0043154	negative regulation of cysteine-type endopeptidase activity involved in apoptotic process	-2.3	1.8	2.9	-0.84		GO Biological Processes	GO:0046605	regulation of centrosome cycle	-2.4	2.3	3.2	-1
GO Biological Processes	GO:0032963	collagen metabolic process	-2.3	1.7	2.9	-0.84		GO Biological Processes	GO:0098900	regulation of action potential	-2.4	2.3	3.2	-1
GO Biological Processes	GO:0072697	protein localization to cell cortex	-2.3	3.3	3.4	-0.84		GO Biological Processes	GO:0090307	mitotic spindle assembly	-2.4	2.3	3.2	-1
GO Biological Processes	GO:1905063	regulation of vascular smooth muscle cell differentiation	-2.3	3.3	3.4	-0.84		GO Biological Processes	GO:0010092	specification of animal organ identity	-2.4	2.6	3.3	-0.99
Reactome Gene Sets	R-MMU-200425	Import of palmitoyl-CoA into the mitochondrial matrix	-2.3	3.3	3.4	-0.84		GO Biological Processes	GO:0086091	regulation of heart rate by cardiac conduction	-2.4	2.8	3.4	-0.99
GO Biological Processes	GO:0097066	response to thyroid hormone	-2.3	3.3	3.4	-0.84		GO Biological Processes	GO:0032467	positive regulation of cytokinesis	-2.4	2.8	3.4	-0.99
GO Biological Processes	GO:0099550	trans-synaptic signaling, modulating synaptic transmission	-2.3	3.3	3.4	-0.84		GO Biological Processes	GO:0071539	protein localization to centrosome	-2.4	2.8	3.4	-0.99
GO Biological Processes	GO:0090151	establishment of protein localization to mitochondrial membrane	-2.3	3.3	3.4	-0.84		KEGG Pathway	mmu04360	Axon guidance	-2.4	1.7	3	-0.99
GO Biological Processes	GO:0000096	sulfur amino acid metabolic process	-2.3	2.3	3.1	-0.84		GO Biological Processes	GO:0017156	calcium ion regulated exocytosis	-2.4	1.7	3	-0.99
GO Biological Processes	GO:0006836	neurotransmitter transport	-2.3	1.4	2.7	-0.84		GO Biological Processes	GO:0050727	regulation of inflammatory response	-2.4	1.5	2.9	-0.98
GO Biological Processes	GO:0007266	Rho protein signal transduction	-2.3	1.5	2.8	-0.84		GO Biological Processes	GO:0060359	response to ammonium ion	-2.4	1.9	3.1	-0.98
GO Biological Processes	GO:0061024	membrane organization	-2.3	1.2	2.7	-0.84		GO Biological Processes	GO:0110020	regulation of actomyosin structure organization	-2.4	1.9	3.1	-0.98
GO Biological Processes	GO:0055092	sterol homeostasis	-2.3	1.8	2.9	-0.83		GO Biological Processes	GO:0010959	regulation of metal ion transport	-2.4	1.4	2.9	-0.98
GO Biological Processes	GO:2001235	positive regulation of apoptotic signaling pathway	-2.2	1.5	2.8	-0.82		GO Biological Processes	GO:0009952	anterior/posterior pattern specification	-2.4	1.6	2.9	-0.98
GO Biological Processes	GO:0010506	regulation of autophagy	-2.2	1.5	2.7	-0.81		GO Biological Processes	GO:0035305	negative regulation of dephosphorylation	-2.4	2	3.1	-0.97
GO Biological Processes	GO:0006413	translational initiation	-2.2	1.7	2.8	-0.8		GO Biological Processes	GO:0007632	visual behavior	-2.4	2.1	3.1	-0.97
GO Biological Processes	GO:0034605	cellular response to heat	-2.2	1.9	2.9	-0.8		KEGG Pathway	mmu04925	Aldosterone synthesis and secretion	-2.4	2	3.1	-0.97
GO Biological Processes	GO:1901264	carbohydrate derivative transport	-2.2	1.9	2.9	-0.8		KEGG Pathway	mmu04022	cGMP-PKG signaling pathway	-2.4	1.7	3	-0.97
Reactome Gene Sets	R-MMU-1630316	Glycosaminoglycan metabolism	-2.2	1.7	2.8	-0.8		GO Biological Processes	GO:0001895	retina homeostasis	-2.4	2.3	3.2	-0.97
GO Biological Processes	GO:0000086	G2/M transition of mitotic cell cycle	-2.2	1.7	2.8	-0.8		GO Biological Processes	GO:0021587	cerebellum morphogenesis	-2.4	2.3	3.2	-0.97
GO Biological Processes	GO:0002115	store-operated calcium entry	-2.2	2.7	3.1	-0.8		GO Biological Processes	GO:1902117	positive regulation of organelle assembly	-2.4	2.1	3.1	-0.97
Reactome Gene Sets	R-MMU-975576	N-glycan antennae elongation in the medial/trans-Golgi	-2.2	2.7	3.1	-0.8		Reactome Gene Sets	R-MMU-389357	CD28 dependent PI3K/Akt signaling	-2.4	3.2	3.5	-0.97
GO Biological Processes	GO:0071902	positive regulation of protein serine/threonine kinase activity	-2.2	1.4	2.7	-0.8		GO Biological Processes	GO:0007141	male meiosis I	-2.4	3.2	3.5	-0.97
GO Biological Processes	GO:0001505	regulation of neurotransmitter levels	-2.2	1.4	2.7	-0.79		GO Biological Processes	GO:0035510	DNA dealkylation	-2.4	3.2	3.5	-0.97
GO Biological Processes	GO:0050435	amyloid-beta metabolic process	-2.2	2.1	3	-0.79		GO Biological Processes	GO:0030217	T cell differentiation	-2.4	1.5	2.9	-0.97
GO Biological Processes	GO:0051653	spindle localization	-2.2	2.1	3	-0.79		GO Biological Processes	GO:0032409	regulation of transporter activity	-2.4	1.5	2.9	-0.97
GO Biological Processes	GO:0006766	vitamin metabolic process	-2.2	1.9	2.9	-0.78		GO Biological Processes	GO:0098771	inorganic ion homeostasis	-2.4	1.3	2.8	-0.97
GO Biological Processes	GO:0009895	negative regulation of catabolic process	-2.2	1.4	2.7	-0.78		GO Biological Processes	GO:0035588	G protein-coupled purinergic receptor signaling pathway	-2.4	4.2	3.7	-0.97
GO Biological Processes	GO:0040008	regulation of growth	-2.2	1.2	2.6	-0.77		GO Biological Processes	GO:0001973	adenosine receptor signaling pathway	-2.4	4.2	3.7	-0.97
GO Biological Processes	GO:0030490	maturation of SSU-rRNA	-2.2	2.2	3	-0.77		GO Biological Processes	GO:1904251	regulation of bile acid metabolic process	-2.4	4.2	3.7	-0.97
GO Biological Processes	GO:0006024	glycosaminoglycan biosynthetic process	-2.2	2.2	3	-0.77		GO Biological Processes	GO:0051052	regulation of DNA metabolic process	-2.4	1.4	2.8	-0.97
GO Biological Processes	GO:0046165	alcohol biosynthetic process	-2.2	1.6	2.8	-0.77		KEGG Pathway	mmu04921	Oxytocin signaling pathway	-2.4	1.7	3	-0.96
Reactome Gene Sets	R-MMU-70268	Pyruvate metabolism	-2.2	2.5	3.1	-0.77		GO Biological Processes	GO:0030098	lymphocyte differentiation	-2.4	1.4	2.8	-0.96
Reactome Gene Sets	R-MMU-389661	Glyoxylate metabolism and glycine degradation	-2.2	2.5	3.1	-0.77		GO Biological Processes	GO:0030323	respiratory tube development	-2.4	1.6	2.9	-0.96
GO Biological Processes	GO:0044342	type B pancreatic cell proliferation	-2.2	2.5	3.1	-0.77		GO Biological Processes	GO:0033044	regulation of chromosome organization	-2.4	1.5	2.8	-0.95
Reactome Gene Sets	R-MMU-72086	mRNA Capping	-2.2	2.5	3.1	-0.77		Reactome Gene Sets	R-MMU-422356	Regulation of insulin secretion	-2.4	2.2	3.1	-0.95
GO Biological Processes	GO:0071804	cellular potassium ion transport	-2.2	1.5	2.7	-0.77		GO Biological Processes	GO:1903078	positive regulation of protein localization to plasma membrane	-2.4	2.2	3.1	-0.95
GO Biological Processes	GO:0071805	potassium ion transmembrane transport	-2.2	1.5	2.7	-0.77		GO Biological Processes	GO:0060147	regulation of posttranscriptional gene silencing	-2.4	2.4	3.2	-0.95
GO Biological Processes	GO:0016125	sterol metabolic process	-2.2	1.6	2.8	-0.77		GO Biological Processes	GO:0048536	spleen development	-2.4	2.4	3.2	-0.95
GO Biological Processes	GO:0090150	establishment of protein localization to membrane	-2.2	1.5	2.7	-0.77		Reactome Gene Sets	R-MMU-2428928	IRS-related events triggered by IGF1R	-2.4	2.4	3.2	-0.95
GO Biological Processes	GO:0010657	muscle cell apoptotic process	-2.2	1.7	2.8	-0.77		GO Biological Processes	GO:0060966	regulation of gene silencing by RNA	-2.4	2.4	3.2	-0.95
GO Biological Processes	GO:0032781	positive regulation of ATPase activity	-2.2	2.3	3	-0.77		GO Biological Processes	GO:0003382	epithelial cell morphogenesis	-2.4	2.4	3.2	-0.95
GO Biological Processes	GO:0032506	cytokinetic process	-2.2	2.3	3	-0.77		GO Biological Processes	GO:0014051	gamma-aminobutyric acid secretion	-2.4	3.6	3.5	-0.95
GO Biological Processes	GO:0006778	porphyrin-containing compound metabolic process	-2.2	2.3	3	-0.77		GO Biological Processes	GO:0048732	gland development	-2.4	1.4	2.8	-0.95
Reactome Gene Sets	R-MMU-432720	Lysosome Vesicle Biogenesis	-2.2	2.4	3	-0.77		GO Biological Processes	GO:0006836	neurotransmitter transport	-2.4	1.5	2.9	-0.95
Reactome Gene Sets	R-MMU-163841	Gamma carboxylation, hypusine formation and arylsulfatase activation	-2.2	2.4	3	-0.77		GO Biological Processes	GO:2001251	negative regulation of chromosome organization	-2.4	1.7	2.9	-0.95
GO Biological Processes	GO:0040001	establishment of mitotic spindle localization	-2.2	2.4	3	-0.77		GO Biological Processes	GO:0010942	positive regulation of cell death	-2.4	1.3	2.8	-0.94
Reactome Gene Sets	R-MMU-6791312	TP53 Regulates Transcription of Cell Cycle Genes	-2.2	2.4	3	-0.77		GO Biological Processes	GO:0045445	myoblast differentiation	-2.3	1.9	3	-0.94
GO Biological Processes	GO:0042558	pteridine-containing compound metabolic process	-2.2	2.4	3	-0.77		GO Biological Processes	GO:0042866	pyruvate biosynthetic process	-2.3	1.9	3	-0.94
KEGG Pathway	mmu01524	Platinum drug resistance	-2.2	1.8	2.8	-0.77		GO Biological Processes	GO:0009416	response to light stimulus	-2.3	1.5	2.9	-0.94
Reactome Gene Sets	R-MMU-171007	p38MAPK events	-2.2	4.5	3.5	-0.76		GO Biological Processes	GO:1904377	positive regulation of protein localization to cell periphery	-2.3	2.1	3.1	-0.94
GO Biological Processes	GO:1905906	regulation of amyloid fibril formation	-2.2	4.5	3.5	-0.76		GO Biological Processes	GO:0022037	metencephalon development	-2.3	1.8	3	-0.94
GO Biological Processes	GO:0006531	aspartate metabolic process	-2.2	4.5	3.5	-0.76		GO Biological Processes	GO:0032925	regulation of activin receptor signaling pathway	-2.3	2.9	3.3	-0.94
GO Biological Processes	GO:0019388	galactose catabolic process	-2.2	4.5	3.5	-0.76		GO Biological Processes	GO:0060384	innervation	-2.3	2.9	3.3	-0.94
GO Biological Processes	GO:0006566	threonine metabolic process	-2.2	4.5	3.5	-0.76		GO Biological Processes	GO:0051589	negative regulation of neurotransmitter transport	-2.3	2.9	3.3	-0.94
GO Biological Processes	GO:0010032	meiotic chromosome condensation	-2.2	4.5	3.5	-0.76		Reactome Gene Sets	R-MMU-5218920	VEGFR2 mediated vascular permeability	-2.3	2.9	3.3	-0.94
GO Biological Processes	GO:0006102	isocitrate metabolic process	-2.2	4.5	3.5	-0.76		Reactome Gene Sets	R-MMU-421270	Cell-cell junction organization	-2.3	2.5	3.2	-0.94
GO Biological Processes	GO:0009438	methylglyoxal metabolic process	-2.2	4.5	3.5	-0.76		GO Biological Processes	GO:0009409	response to cold	-2.3	2.5	3.2	-0.94
GO Biological Processes	GO:0006729	tetrahydrobiopterin biosynthetic process	-2.2	4.5	3.5	-0.76		GO Biological Processes	GO:0031060	regulation of histone methylation	-2.3	2.1	3.1	-0.94
Reactome Gene Sets	R-MMU-6804114	TP53 Regulates Transcription of Genes Involved in G2 Cell Cycle Arrest	-2.2	4.5	3.5	-0.76		GO Biological Processes	GO:0060113	inner ear receptor cell differentiation	-2.3	2	3	-0.94
GO Biological Processes	GO:0000075	cell cycle checkpoint	-2.2	1.5	2.7	-0.76		GO Biological Processes	GO:1905508	protein localization to microtubule organizing center	-2.3	2.7	3.2	-0.93
GO Biological Processes	GO:0006487	protein N-linked glycosylation	-2.2	1.9	2.8	-0.76		GO Biological Processes	GO:0003209	cardiac atrium morphogenesis	-2.3	2.7	3.2	-0.93
GO Biological Processes	GO:0046364	monosaccharide biosynthetic process	-2.2	1.8	2.8	-0.76		GO Biological Processes	GO:0031214	biomineral tissue development	-2.3	1.7	2.9	-0.93
GO Biological Processes	GO:0042219	cellular modified amino acid catabolic process	-2.2	2.9	3.1	-0.76		GO Biological Processes	GO:0031103	axon regeneration	-2.3	2.3	3.1	-0.93
GO Biological Processes	GO:0006309	apoptotic DNA fragmentation	-2.2	2.9	3.1	-0.76		Reactome Gene Sets	R-MMU-983705	Signaling by the B Cell Receptor (BCR)	-2.3	2.3	3.1	-0.93
GO Biological Processes	GO:0010544	negative regulation of platelet activation	-2.2	2.9	3.1	-0.76		GO Biological Processes	GO:0042908	xenobiotic transport	-2.3	5.1	3.8	-0.93
GO Biological Processes	GO:0044794	positive regulation by host of viral process	-2.2	2.9	3.1	-0.76		GO Biological Processes	GO:0000820	regulation of glutamine family amino acid metabolic process	-2.3	5.1	3.8	-0.93
GO Biological Processes	GO:0007017	microtubule-based process	-2.1	1.2	2.6	-0.74		GO Biological Processes	GO:0035507	regulation of myosin-light-chain-phosphatase activity	-2.3	5.1	3.8	-0.93
GO Biological Processes	GO:0043405	regulation of MAP kinase activity	-2.1	1.4	2.6	-0.74		GO Biological Processes	GO:1900246	positive regulation of RIG-I signaling pathway	-2.3	5.1	3.8	-0.93
GO Biological Processes	GO:1902749	regulation of cell cycle G2/M phase transition	-2.1	1.7	2.8	-0.74		GO Biological Processes	GO:1901201	regulation of extracellular matrix assembly	-2.3	5.1	3.8	-0.93
GO Biological Processes	GO:0007584	response to nutrient	-2.1	1.7	2.7	-0.74		GO Biological Processes	GO:0090381	regulation of heart induction	-2.3	5.1	3.8	-0.93
Reactome Gene Sets	R-MMU-193648	NRAGE signals death through JNK	-2.1	2.1	2.9	-0.74		GO Biological Processes	GO:0044387	negative regulation of protein kinase activity by regulation of protein phosphorylation	-2.3	5.1	3.8	-0.93
GO Biological Processes	GO:1901987	regulation of cell cycle phase transition	-2.1	1.4	2.6	-0.74		GO Biological Processes	GO:0043983	histone H4-K12 acetylation	-2.3	5.1	3.8	-0.93
GO Biological Processes	GO:0006121	mitochondrial electron transport, succinate to ubiquinone	-2.1	5.8	3.7	-0.74		GO Biological Processes	GO:0034655	nucleobase-containing compound catabolic process	-2.3	1.4	2.8	-0.93
GO Biological Processes	GO:0046121	deoxyribonucleoside catabolic process	-2.1	5.8	3.7	-0.74		GO Biological Processes	GO:0016482	cytosolic transport	-2.3	1.7	2.9	-0.92
GO Biological Processes	GO:2000563	positive regulation of CD4-positive, alpha-beta T cell proliferation	-2.1	5.8	3.7	-0.74		GO Biological Processes	GO:0051897	positive regulation of protein kinase B signaling	-2.3	1.9	3	-0.92
GO Biological Processes	GO:0071962	mitotic sister chromatid cohesion, centromeric	-2.1	5.8	3.7	-0.74		GO Biological Processes	GO:1903305	regulation of regulated secretory pathway	-2.3	1.6	2.9	-0.92
Reactome Gene Sets	R-MMU-140179	Amine Oxidase reactions	-2.1	5.8	3.7	-0.74		GO Biological Processes	GO:0031669	cellular response to nutrient levels	-2.3	1.6	2.9	-0.92
Reactome Gene Sets	R-MMU-69478	G2/M DNA replication checkpoint	-2.1	5.8	3.7	-0.74		GO Biological Processes	GO:0008154	actin polymerization or depolymerization	-2.3	1.6	2.9	-0.92
GO Biological Processes	GO:0060282	positive regulation of oocyte development	-2.1	5.8	3.7	-0.74		GO Biological Processes	GO:0051260	protein homooligomerization	-2.3	1.4	2.8	-0.92
GO Biological Processes	GO:0090521	glomerular visceral epithelial cell migration	-2.1	5.8	3.7	-0.74		GO Biological Processes	GO:0051896	regulation of protein kinase B signaling	-2.3	1.7	2.9	-0.92
GO Biological Processes	GO:1903553	positive regulation of extracellular exosome assembly	-2.1	5.8	3.7	-0.74		GO Biological Processes	GO:0062013	positive regulation of small molecule metabolic process	-2.3	1.7	2.9	-0.92
GO Biological Processes	GO:1990086	lens fiber cell apoptotic process	-2.1	5.8	3.7	-0.74		Reactome Gene Sets	R-MMU-373760	L1CAM interactions	-2.3	2.2	3.1	-0.91
GO Biological Processes	GO:0032286	central nervous system myelin maintenance	-2.1	5.8	3.7	-0.74		GO Biological Processes	GO:0001941	postsynaptic membrane organization	-2.3	2.4	3.1	-0.91
GO Biological Processes	GO:0055129	L-proline biosynthetic process	-2.1	5.8	3.7	-0.74		GO Biological Processes	GO:0070918	production of small RNA involved in gene silencing by RNA	-2.3	2.4	3.1	-0.91
GO Biological Processes	GO:0030951	establishment or maintenance of microtubule cytoskeleton polarity	-2.1	5.8	3.7	-0.74		GO Biological Processes	GO:0016574	histone ubiquitination	-2.3	2.4	3.1	-0.91
Reactome Gene Sets	R-MMU-156711	Polo-like kinase mediated events	-2.1	5.8	3.7	-0.74		GO Biological Processes	GO:0031050	dsRNA processing	-2.3	2.4	3.1	-0.91
GO Biological Processes	GO:1902109	negative regulation of mitochondrial membrane permeability involved in apoptotic process	-2.1	5.8	3.7	-0.74		Reactome Gene Sets	R-MMU-2428924	IGF1R signaling cascade	-2.3	2.4	3.1	-0.91
GO Biological Processes	GO:1905881	positive regulation of oogenesis	-2.1	5.8	3.7	-0.74		GO Biological Processes	GO:0048168	regulation of neuronal synaptic plasticity	-2.3	2.1	3	-0.91
Reactome Gene Sets	R-MMU-948021	Transport to the Golgi and subsequent modification	-2.1	1.5	2.7	-0.73		KEGG Pathway	mmu04720	Long-term potentiation	-2.3	2.1	3	-0.91
GO Biological Processes	GO:0000165	MAPK cascade	-2.1	1.2	2.5	-0.73		GO Biological Processes	GO:0061371	determination of heart left/right asymmetry	-2.3	2.1	3	-0.91
GO Biological Processes	GO:0032386	regulation of intracellular transport	-2.1	1.3	2.6	-0.73		GO Biological Processes	GO:0051051	negative regulation of transport	-2.3	1.4	2.7	-0.91
Reactome Gene Sets	R-MMU-69052	Switching of origins to a post-replicative state	-2.1	2.1	2.9	-0.73		GO Biological Processes	GO:0043068	positive regulation of programmed cell death	-2.3	1.3	2.7	-0.9
GO Biological Processes	GO:0072010	glomerular epithelium development	-2.1	3.1	3.1	-0.73		GO Biological Processes	GO:0001659	temperature homeostasis	-2.3	1.6	2.9	-0.9
GO Biological Processes	GO:0010878	cholesterol storage	-2.1	3.1	3.1	-0.73		GO Biological Processes	GO:0034767	positive regulation of ion transmembrane transport	-2.3	1.6	2.9	-0.9
GO Biological Processes	GO:0051382	kinetochore assembly	-2.1	3.1	3.1	-0.73		GO Biological Processes	GO:1903034	regulation of response to wounding	-2.3	1.6	2.9	-0.9
GO Biological Processes	GO:0045073	regulation of chemokine biosynthetic process	-2.1	3.1	3.1	-0.73		GO Biological Processes	GO:0003205	cardiac chamber development	-2.3	1.6	2.8	-0.9
GO Biological Processes	GO:1902430	negative regulation of amyloid-beta formation	-2.1	3.1	3.1	-0.73		GO Biological Processes	GO:0010810	regulation of cell-substrate adhesion	-2.3	1.6	2.8	-0.9
GO Biological Processes	GO:0030259	lipid glycosylation	-2.1	3.1	3.1	-0.73		GO Biological Processes	GO:0071559	response to transforming growth factor beta	-2.3	1.6	2.8	-0.9
[truncated: 192 more rows]

## Sheet: Overlapping stress genes
Upregulated								Downregulated
[truncated: 490 more rows]

## Sheet: HFD-KO vs RC-WT only
Upregulated								Downregulated
[truncated: 424 more rows]

## Sheet: HFD-WT females vs males
Upregulated								Downregulated
[truncated: 641 more rows]
