# Supplementary material
Source: publisher figshare collection journal article supplement (https://diabetesjournals.figshare.com/articles/dataset/_/12170184)

**Figure S9**

**A.**

**GTT: RC male vs female**

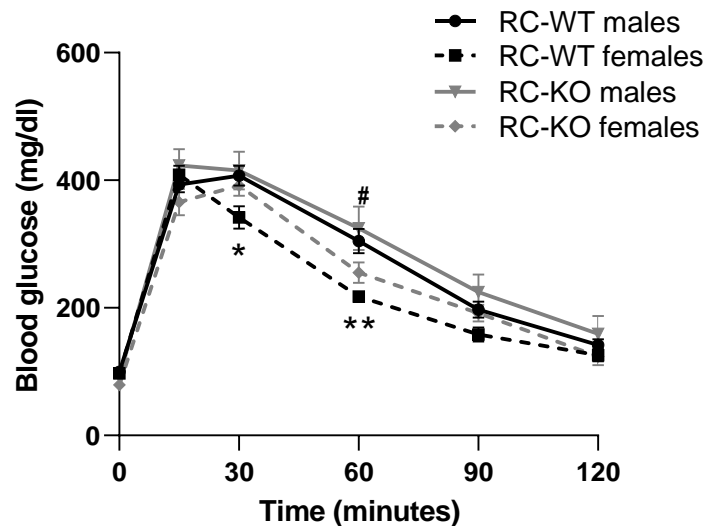

**B.**

**GTT: HFD male vs female**

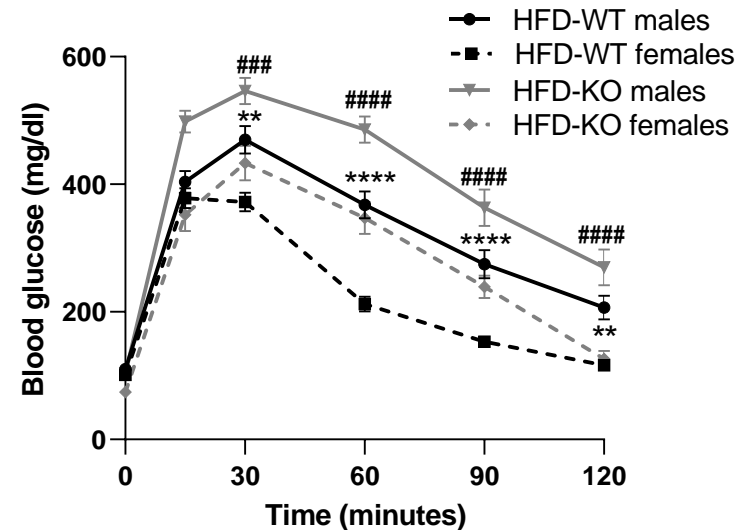

**C.**

**GTT: HFD+ver males vs females**

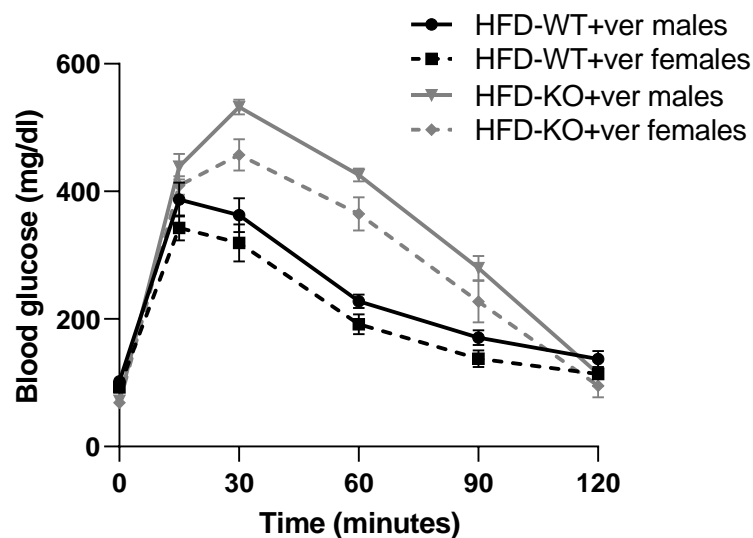

**D.**

**GTT AUC: males vs females**

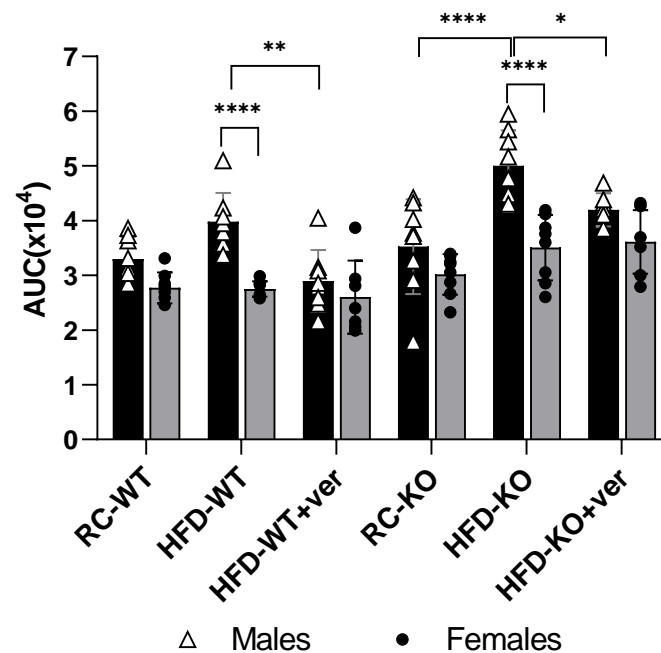

Supplement: Supplementary file 3 [file 2]
