# Supplementary material
Source: publisher figshare collection journal article supplement (https://diabetesjournals.figshare.com/articles/dataset/_/12170184)

**Figure S10****A.****ITT: RC males vs females**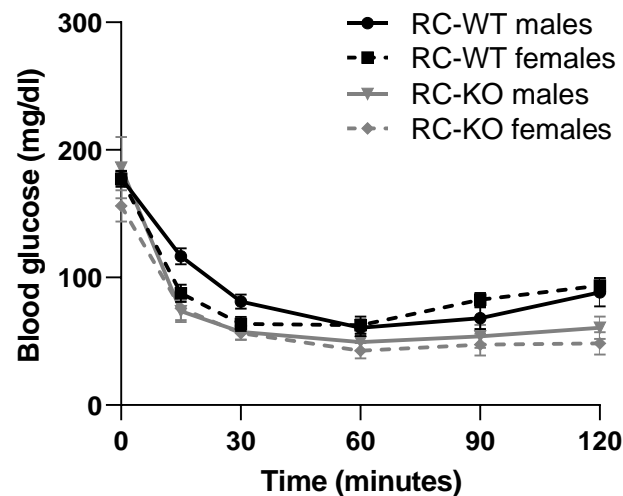**B.****ITT: HFD males vs females**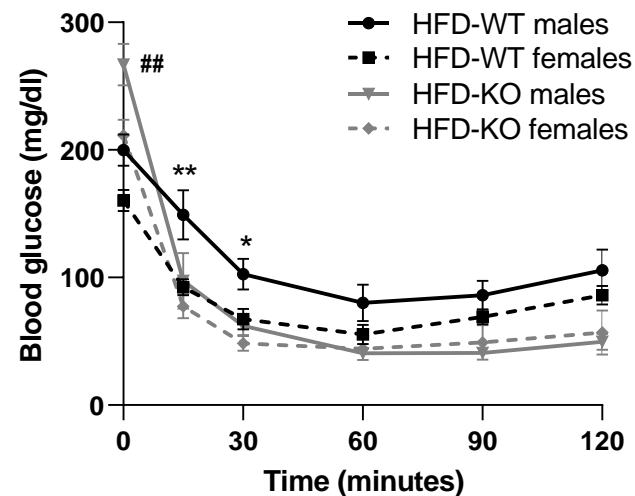**C.****ITT: HFD+ver males vs females**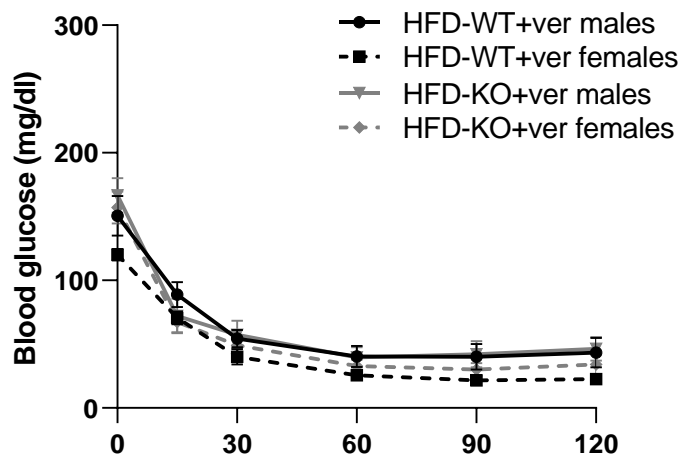**D.****ITT AUC: males vs females**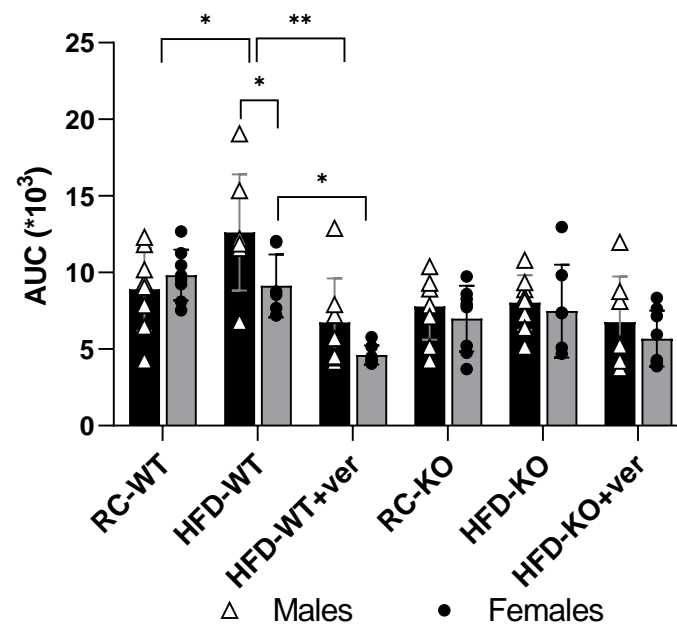

Supplement: Supplementary file 6 [file 2]
