# Supplementary material
Source: publisher figshare collection journal article supplement (https://diabetesjournals.figshare.com/articles/dataset/_/12170184)

**Figure S8**

**A. Weight gain on HFD: males vs females**

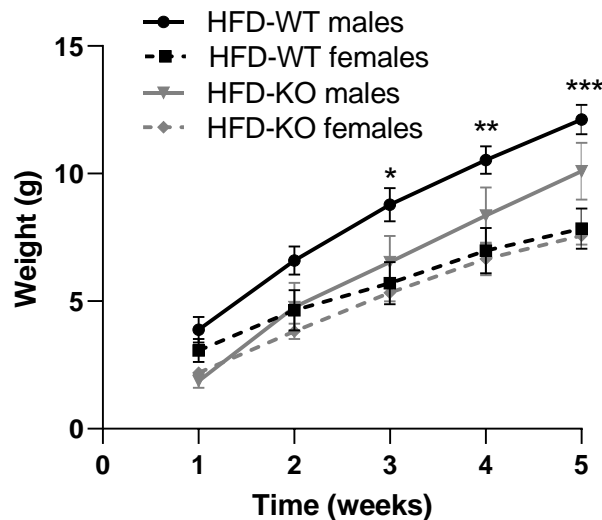

**B. Weight gain on HFD+ver: males vs females**

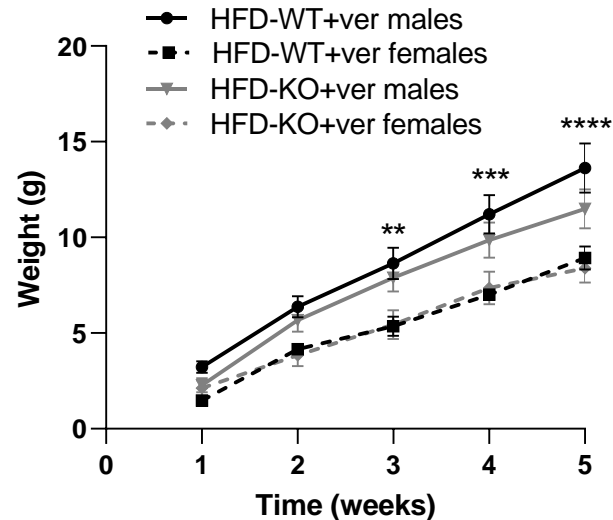

**C. Fasting glucose: males vs females**

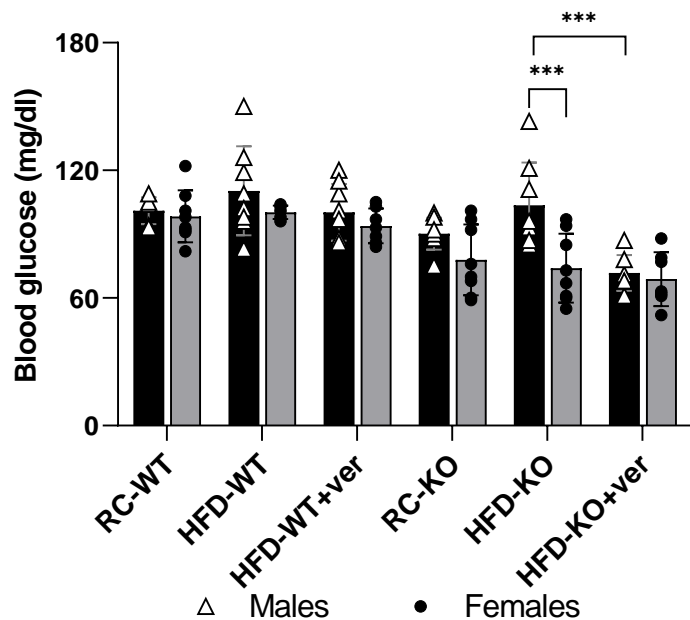

**D. Fed glucose: males vs females**

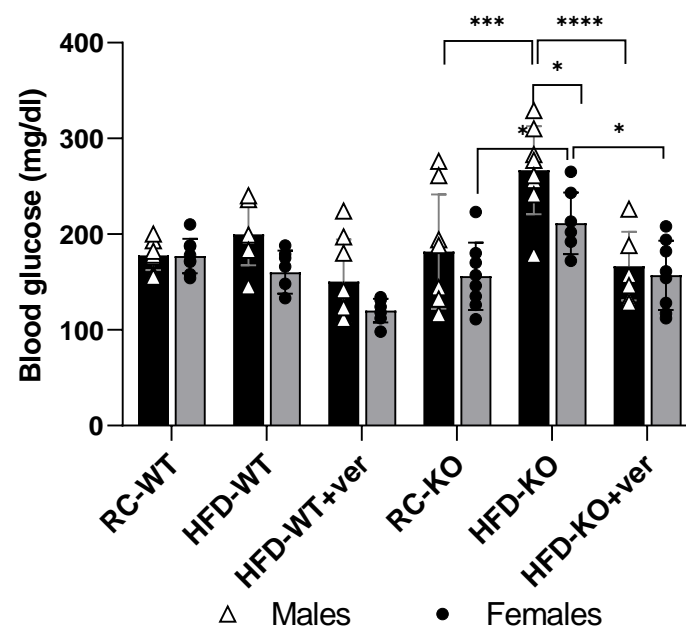

Supplement: Supplementary file 10 [file 2]
