# Supplementary material
Source: publisher figshare collection journal article supplement (https://diabetesjournals.figshare.com/articles/dataset/_/12170184)

Figure S12

A.

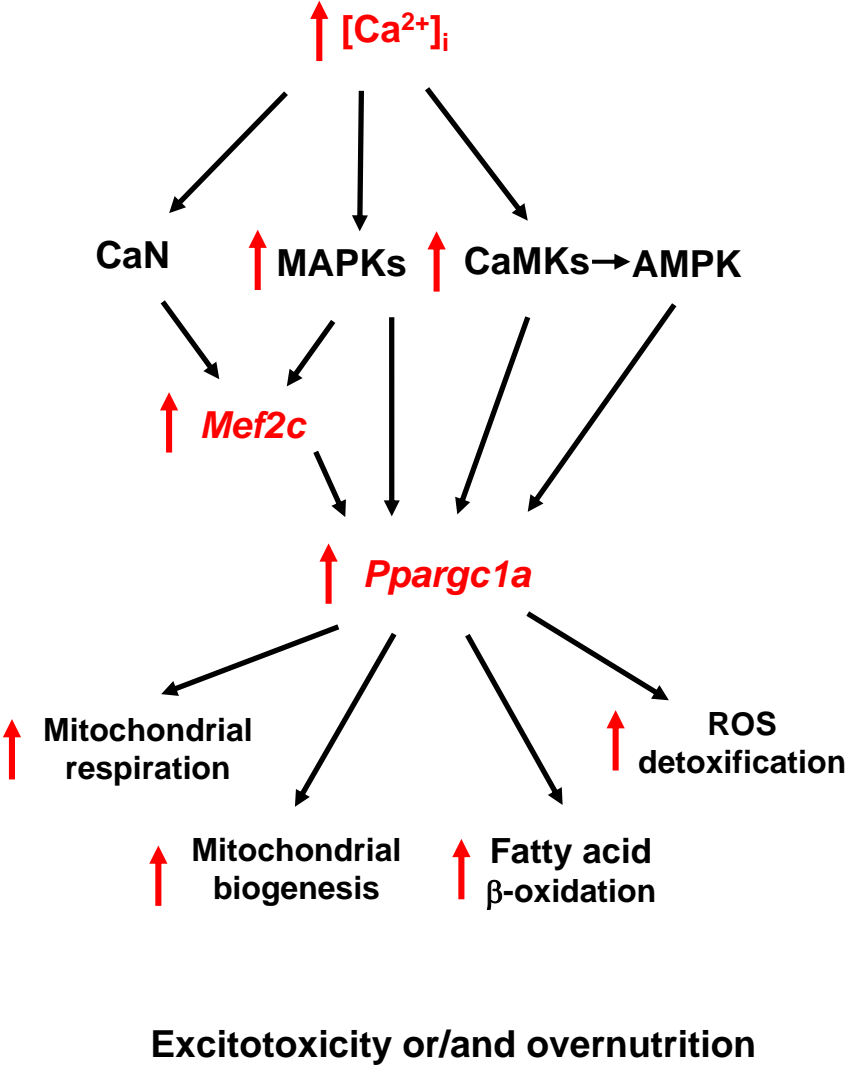

B.

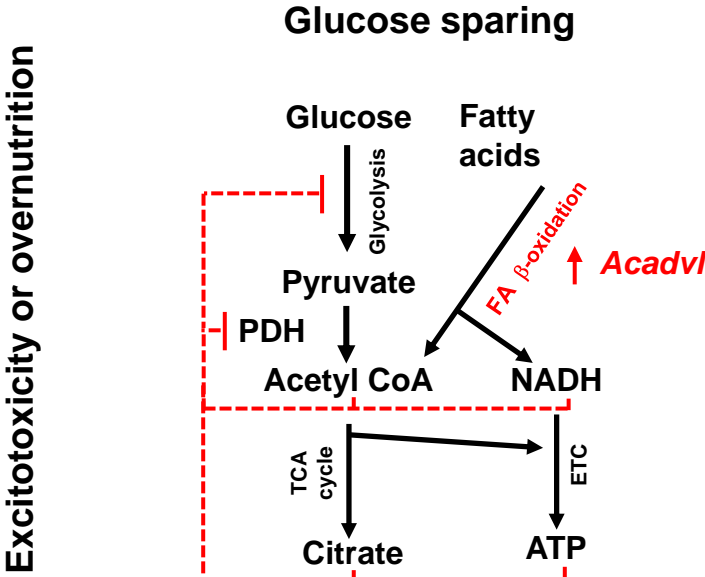

C.

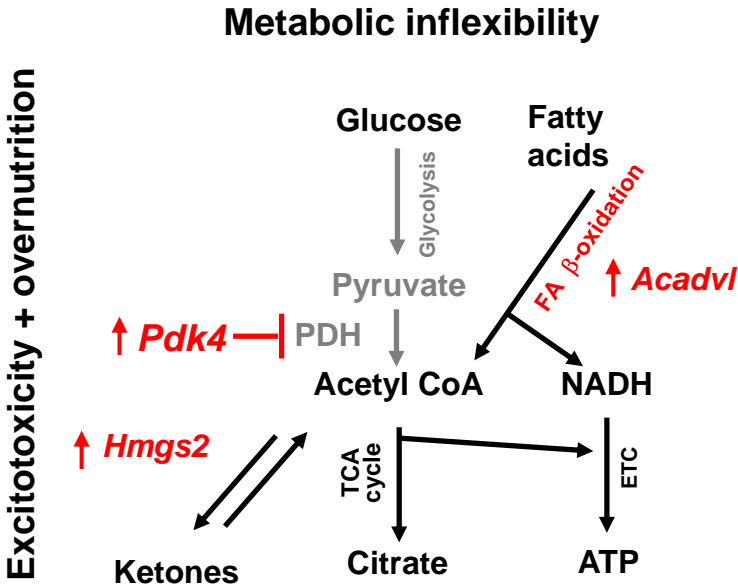

Supplement: Supplementary file 1 [file 2]

Figure S11

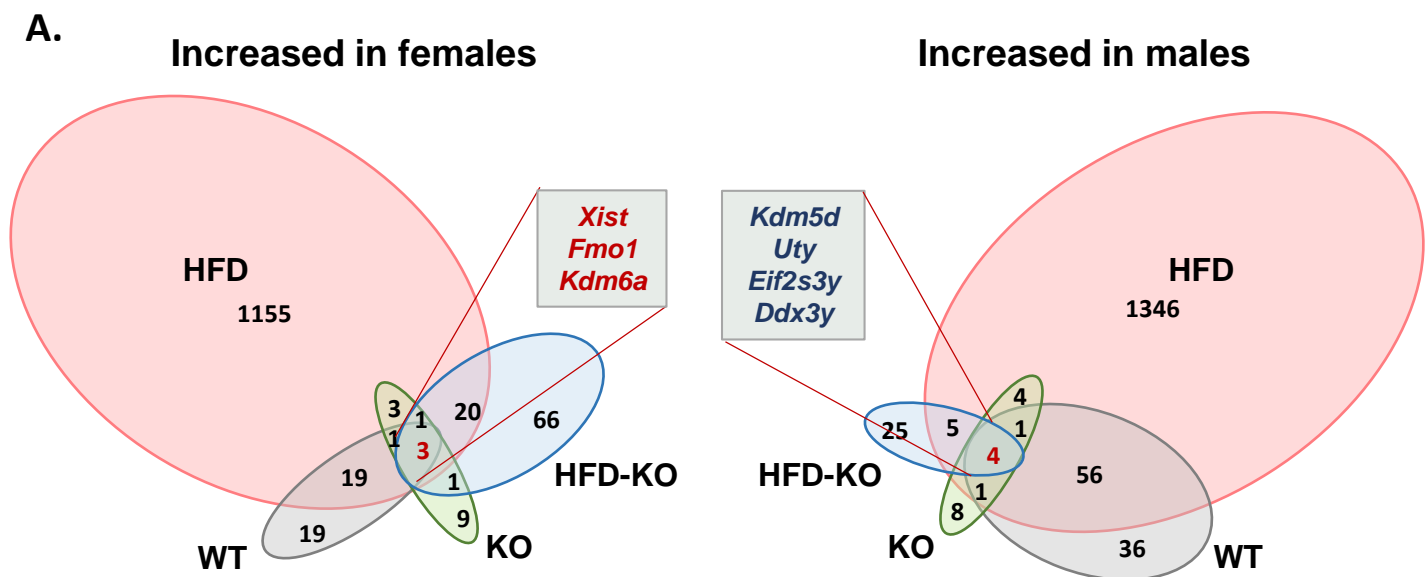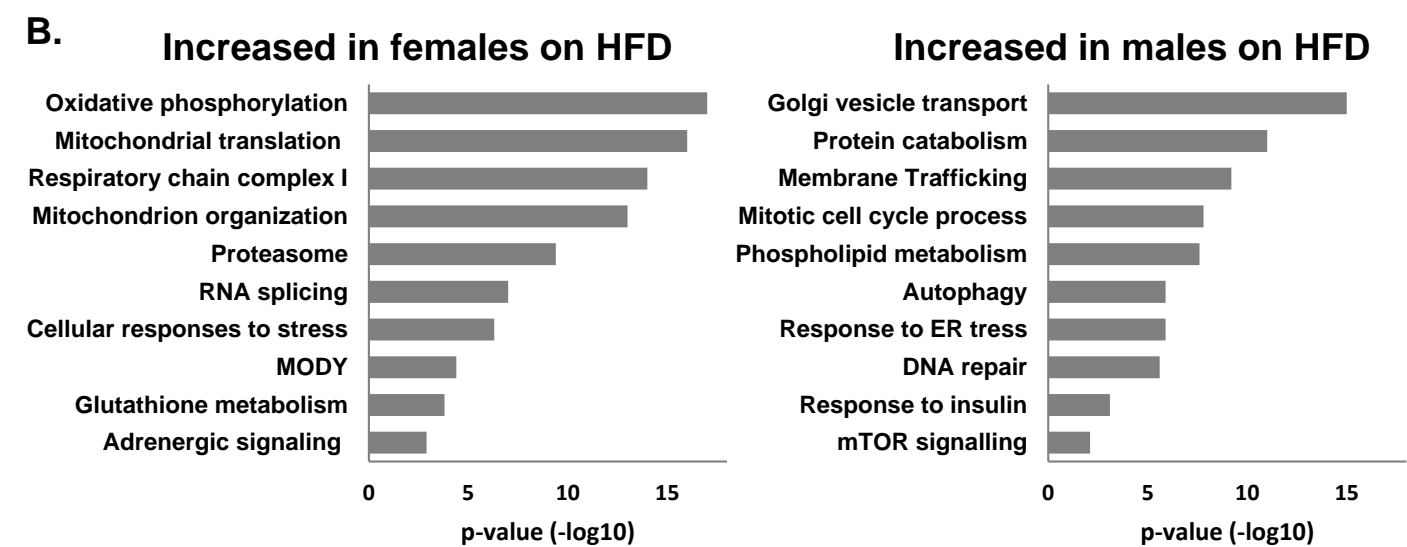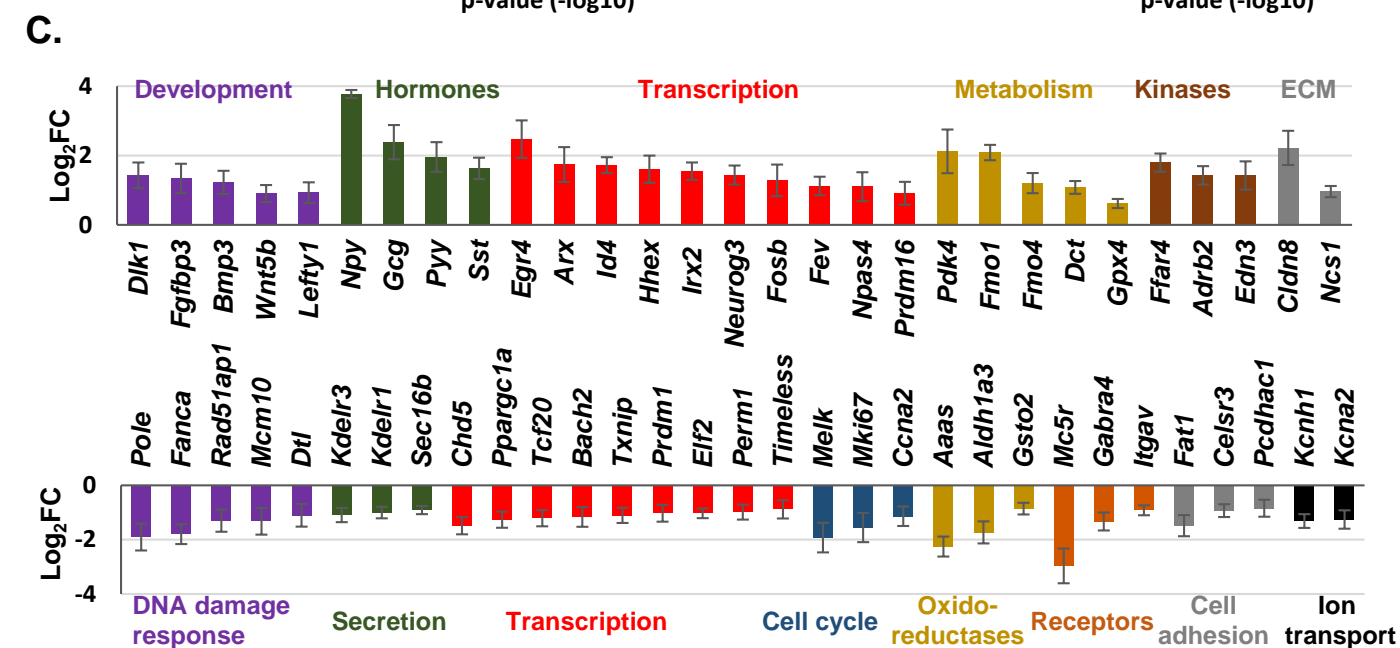

Supplement: Supplementary file 2 [file 2]

Figure S7

URGs in HFD-KO only

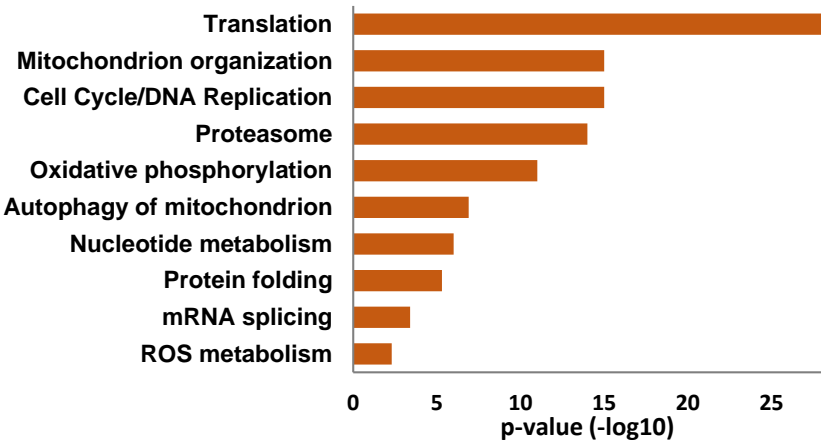

DRGs in KO-HFD only

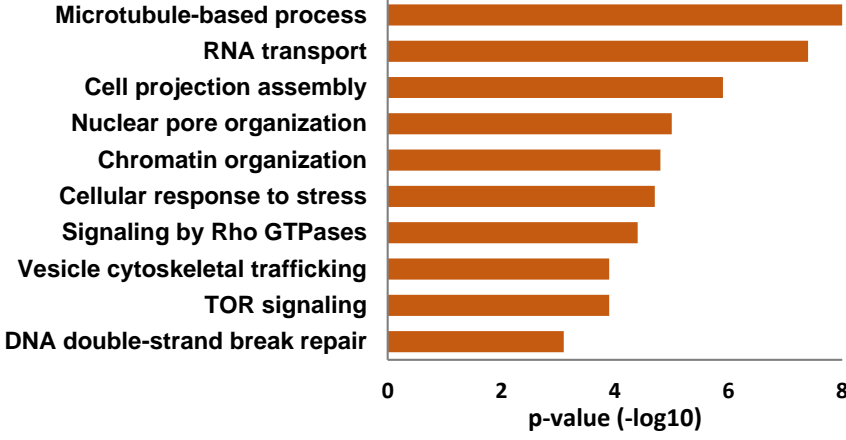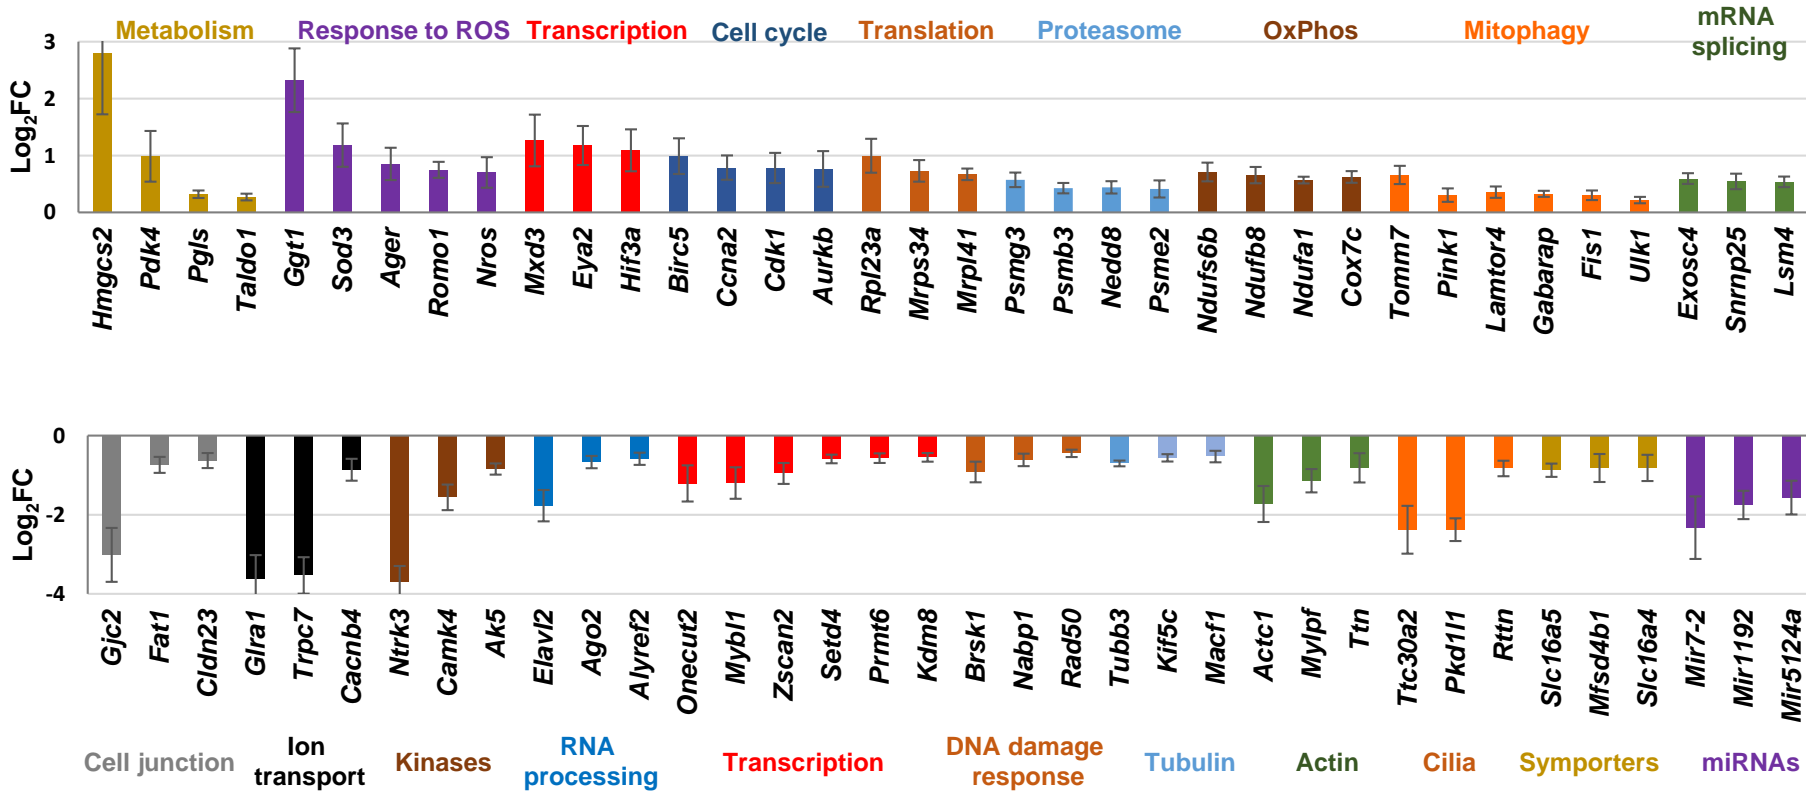

Supplement: Supplementary file 4 [file 2]

Figure S3

A. RC-KO vs RC-WT

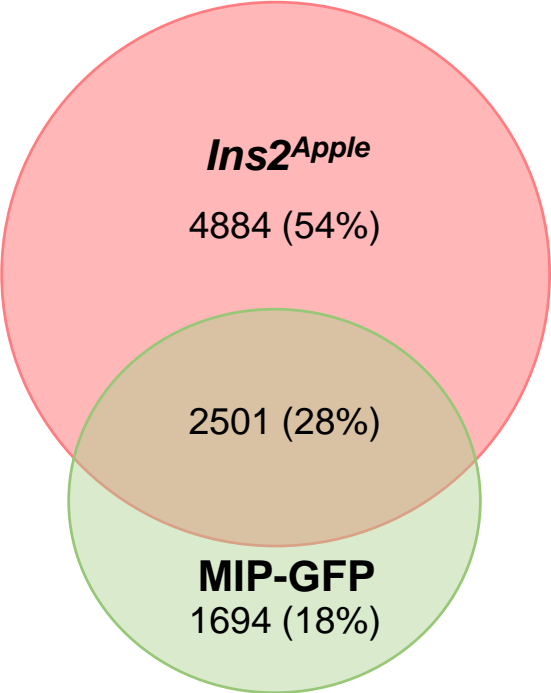

B.

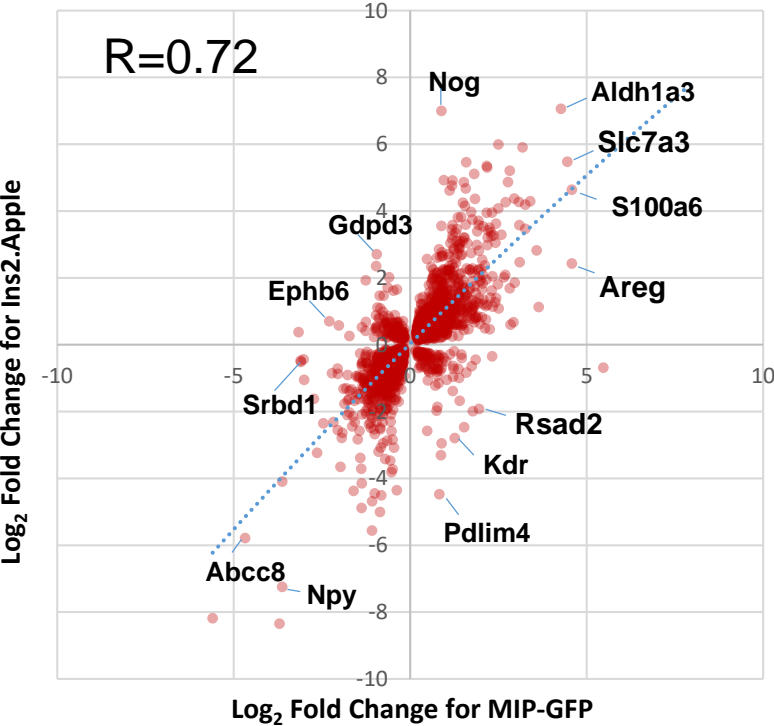

Supplement: Supplementary file 5 [file 2]

**Figure S5**

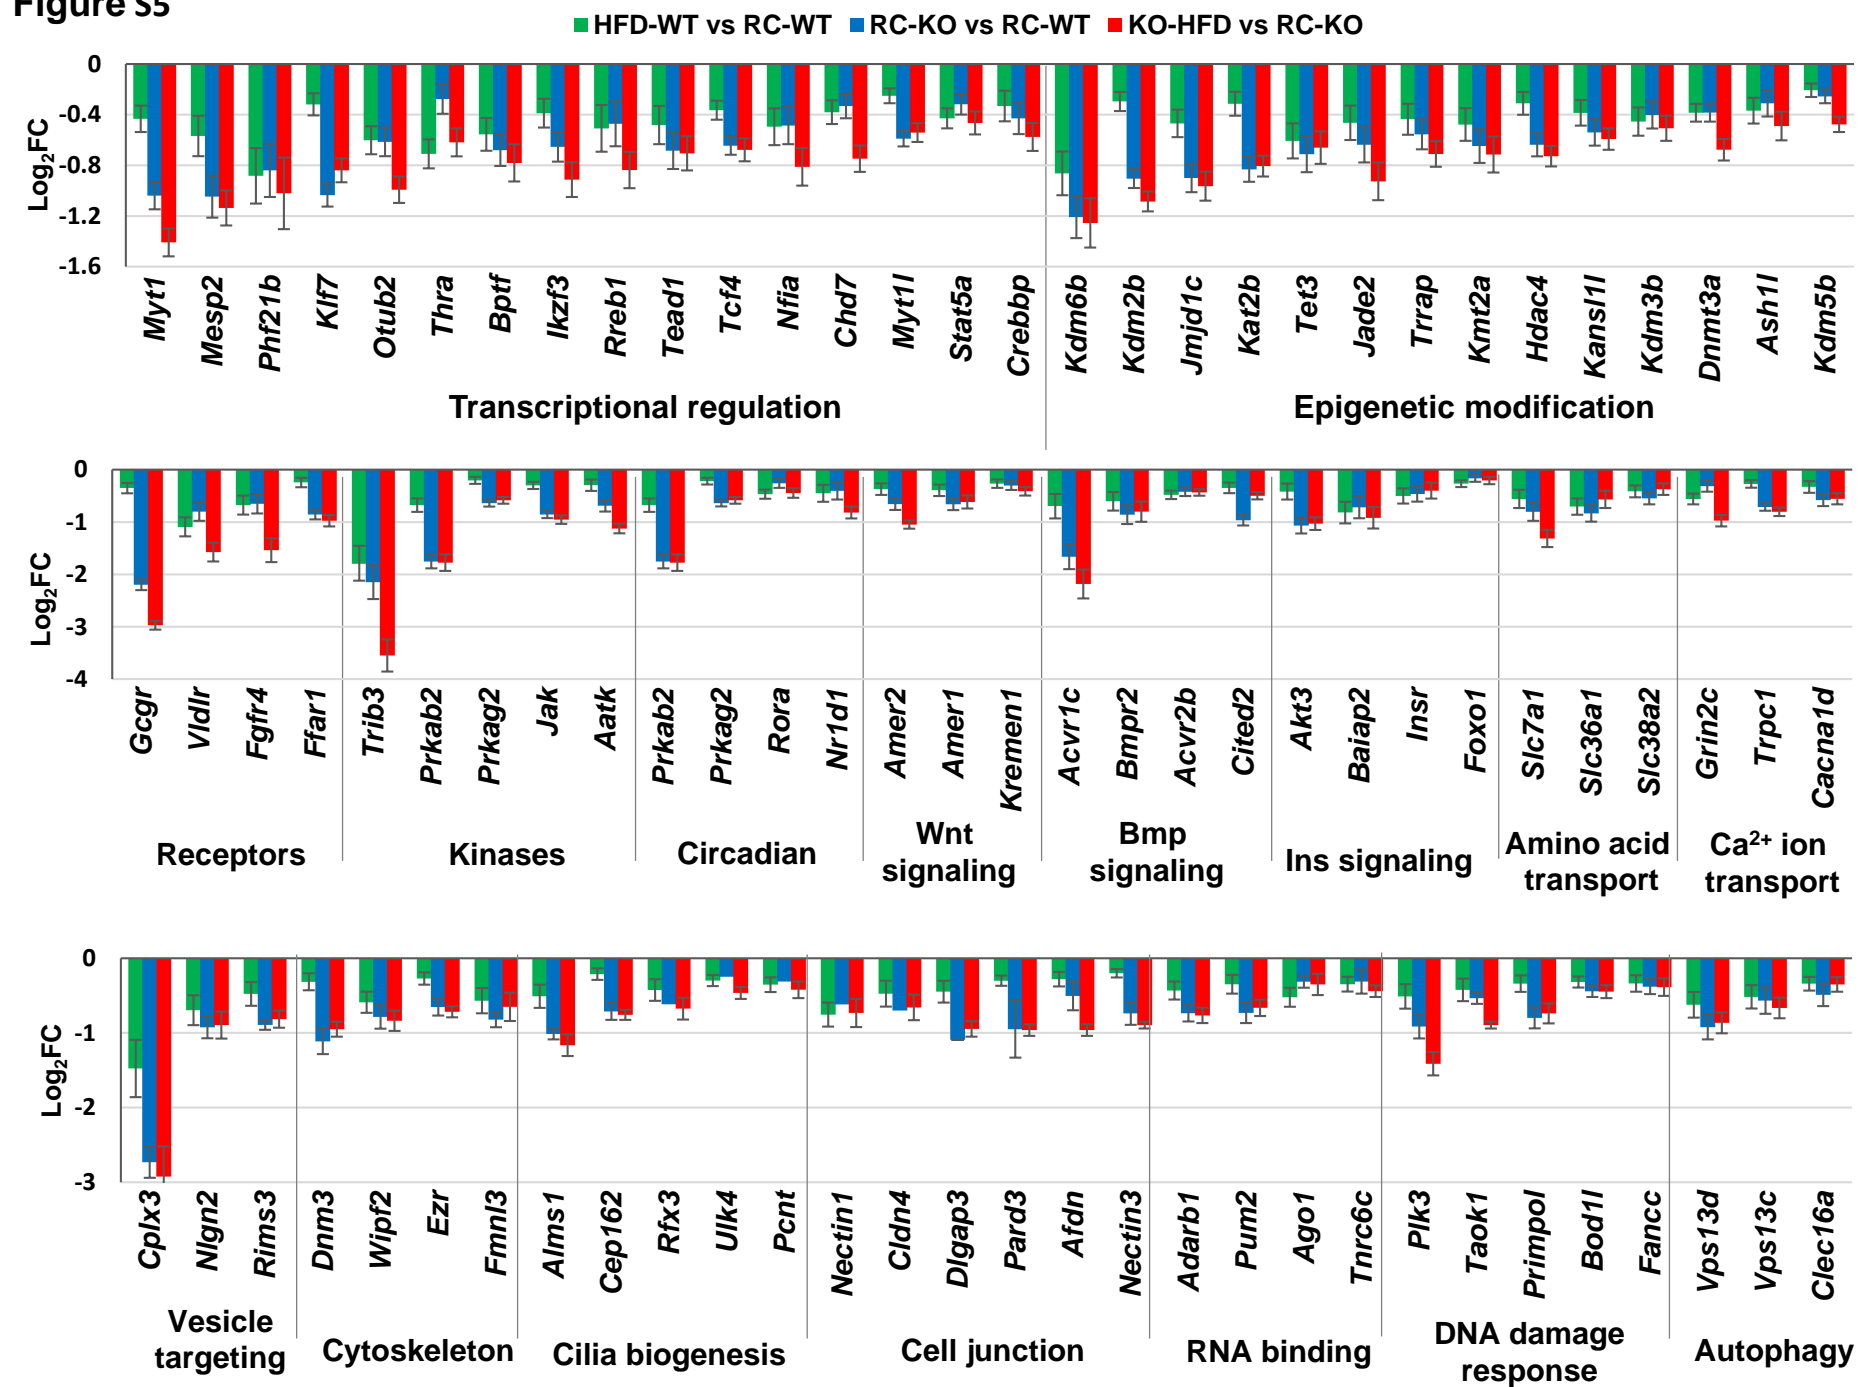

Supplement: Supplementary file 7 [file 2]

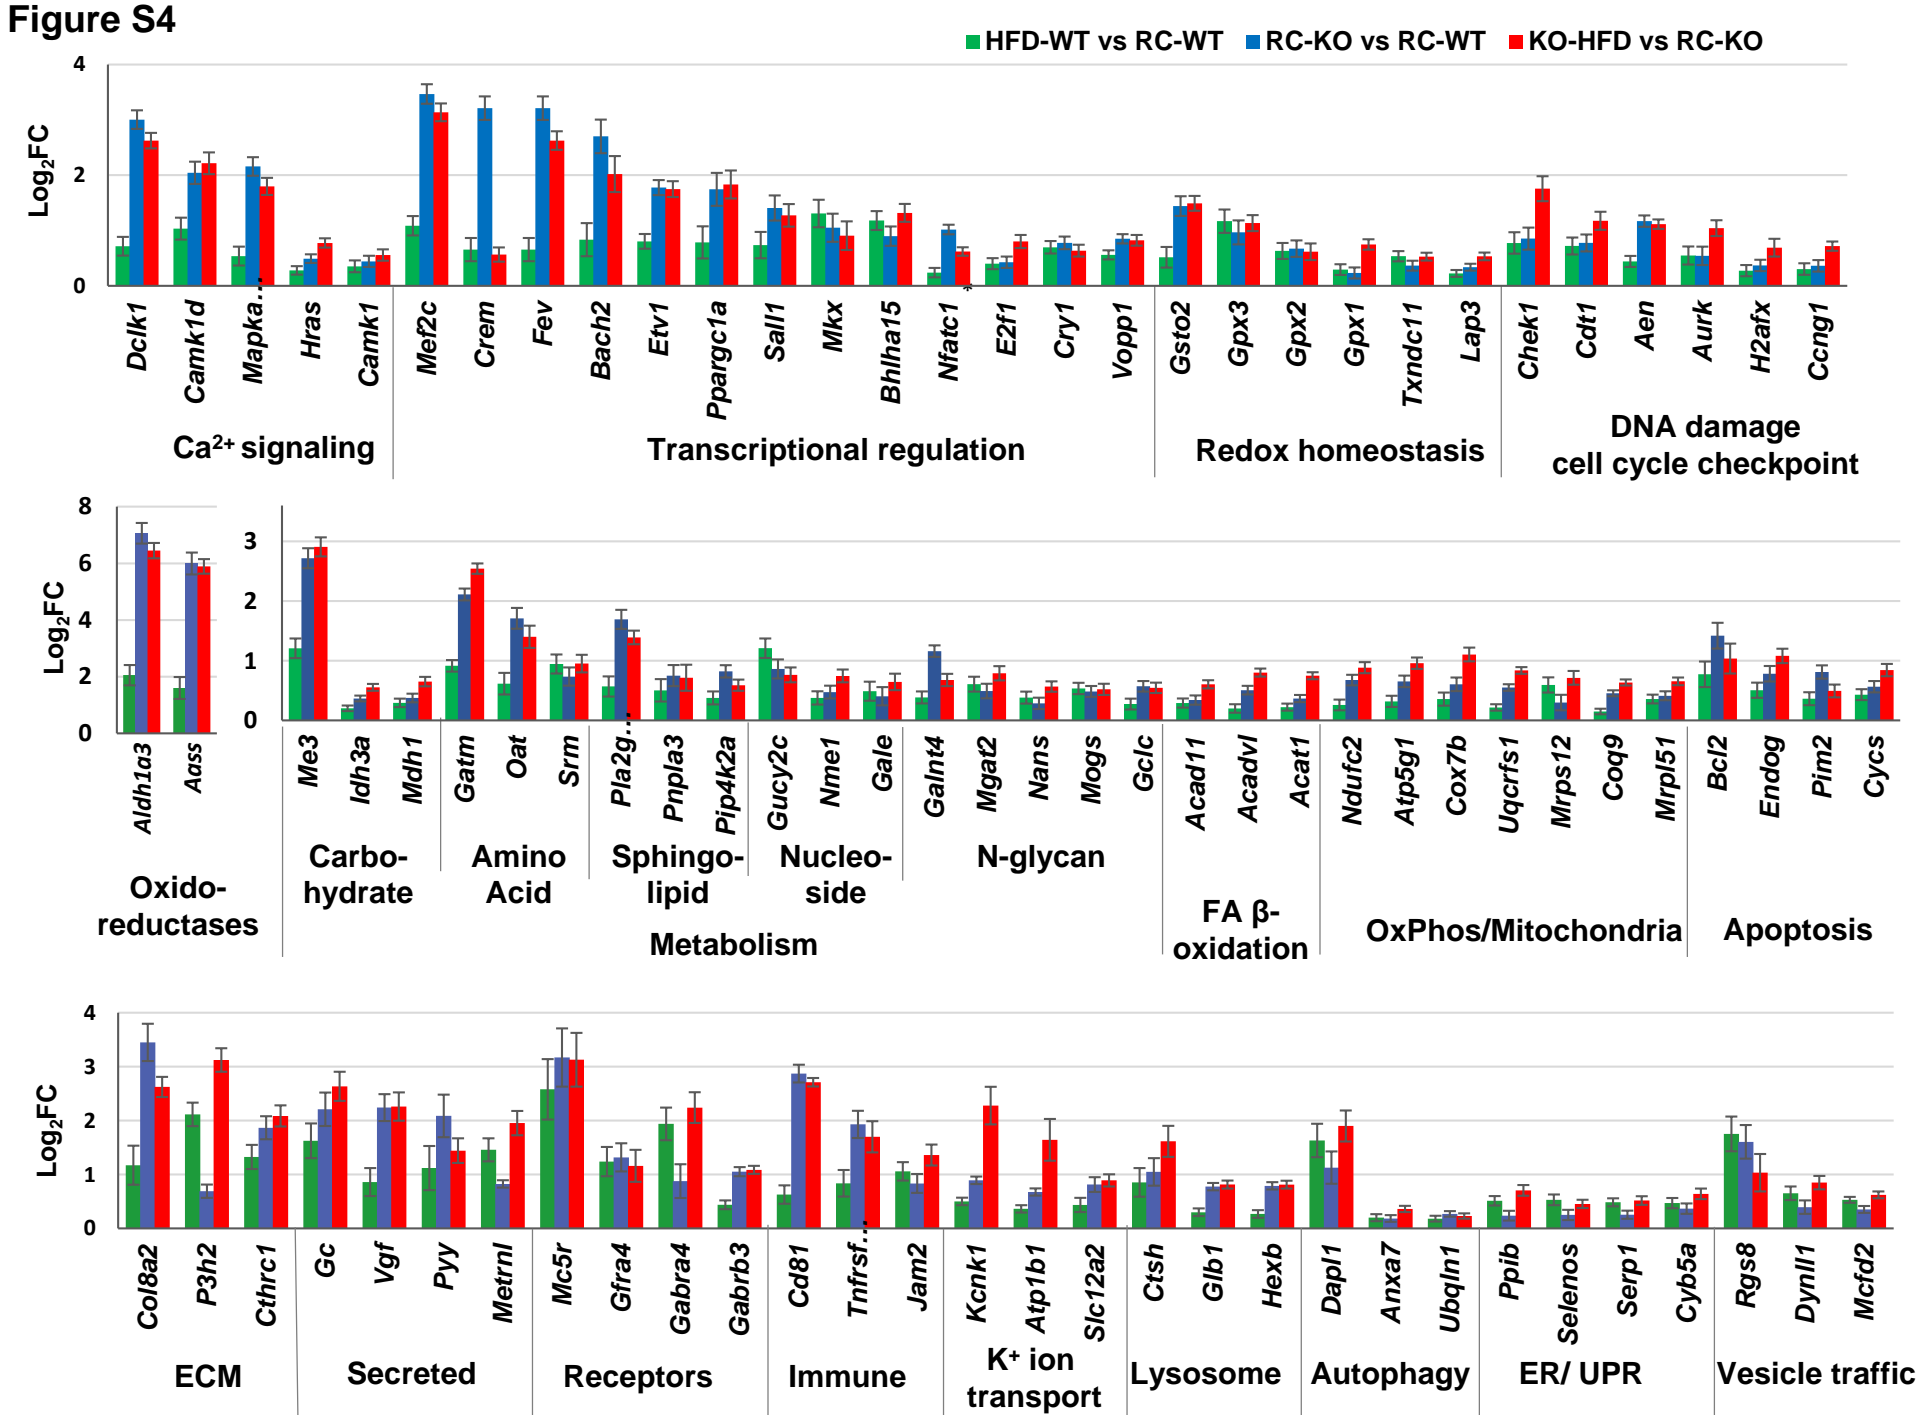

Supplement: Supplementary file 8 [file 2]

**A.**

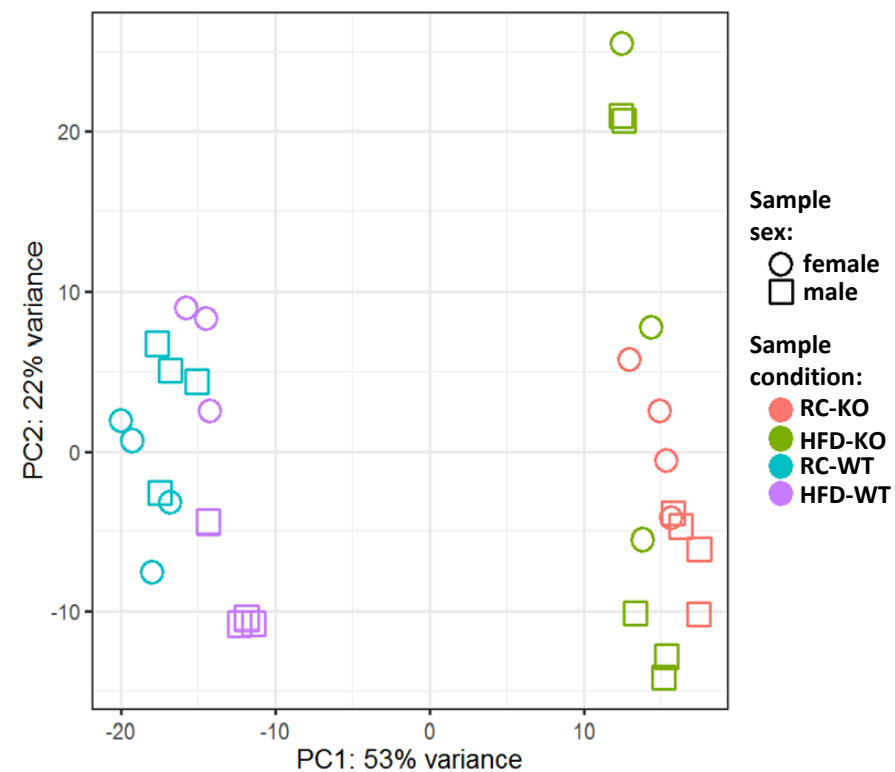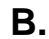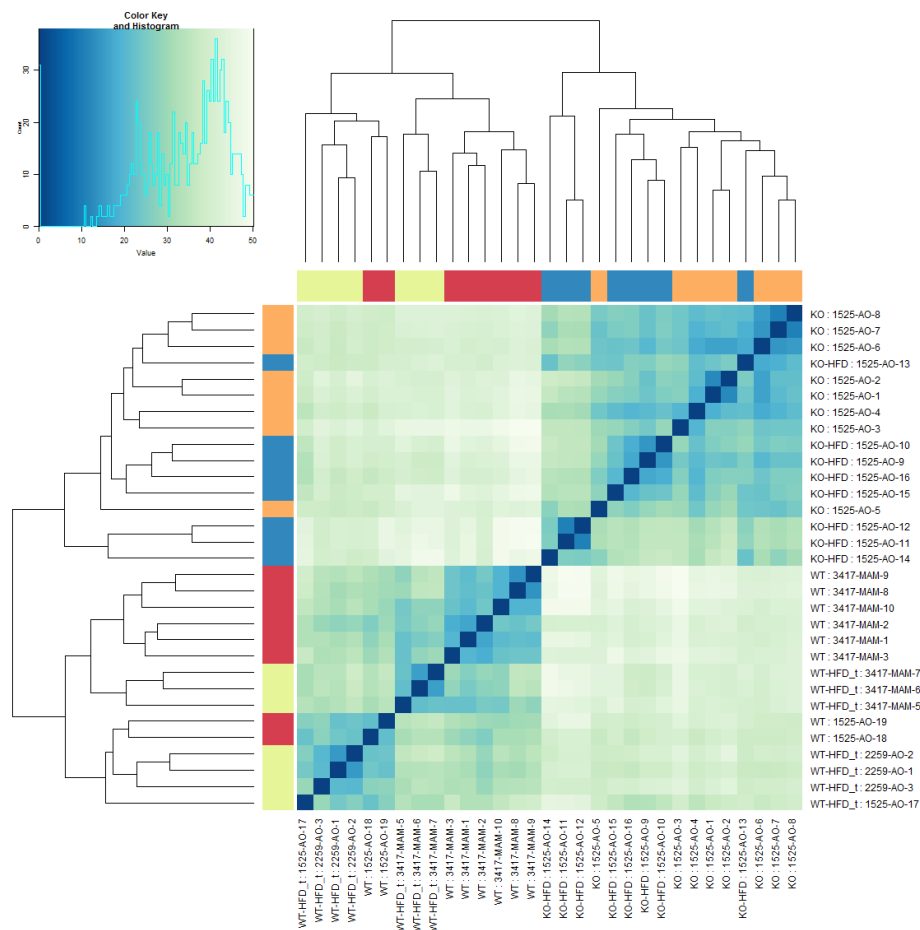

Supplement: Supplementary file 9 [file 2]

Figure S6

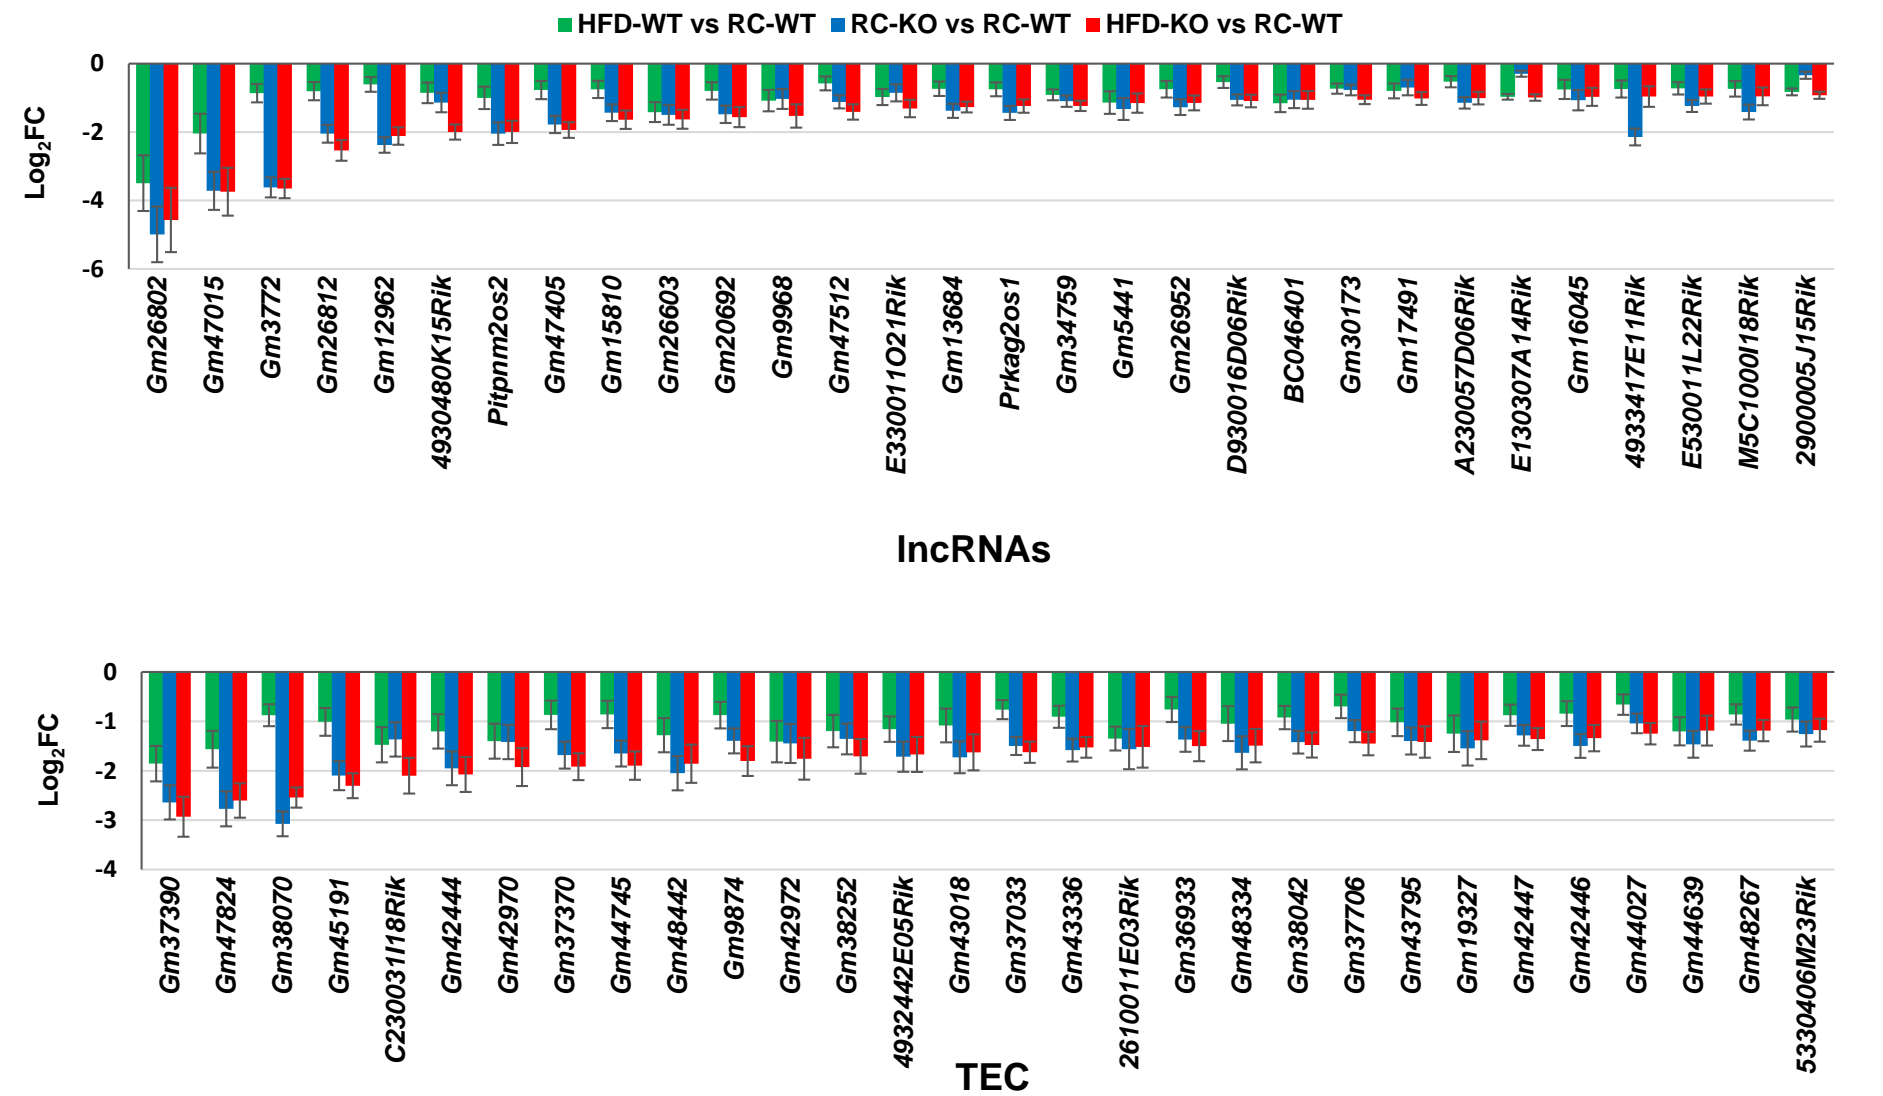

Supplement: Supplementary file 11 [file 2]

**Figure S1**

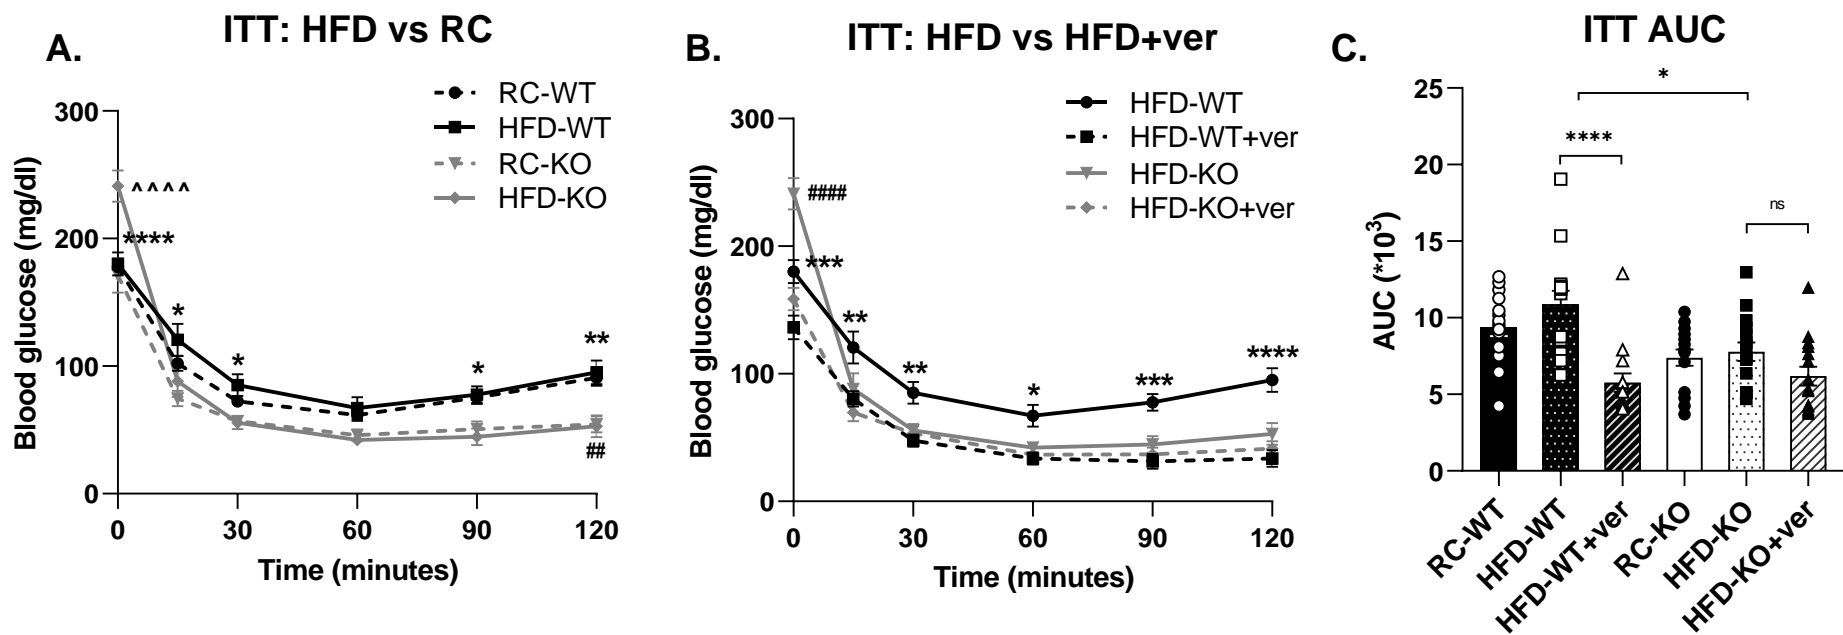

Supplement: Supplementary file 12 [file 2]
